# Supplementary material for: Circ4207 regulates vasculogenic mimicry formation in colorectal cancer through the miR-20b-5p/VEGFA axis
Source: Research Square preprint supplement (doi:10.21203/rs.3.rs-4395844/v1), 2024-05-23
Supplement: Supplementary file 1 [file 16e0683a22c15bc18cc42db7.docx]

| **Gene name** | **Forward primer (5’-3’)** | **Reverse primer (5’-3’)** |
| --- | --- | --- |
| Circ4207 | TCCAACATCATCCCCATTAGGTAC | ACTTCGGGGATTTGAGGTATTCAT |
| Circ4207(Divergent) | TCCAACATCATCCCCATTAGGTAC | ACTTCGGGGATTTGAGGTATTCAT |
| Circ4207(Convergent) | ATCATCCCCATTAGGTACTGTTG | TTCCAAGTCGAACAGGCCGAT |
| ATP9A | ATAGAGAACACGCTGTGGGC | CAAGTCGAACAGGCCGATCT |
| miR-20b-5p | GGATCGCAAAGTGCTCATAGTGC | GTGCAGGGTCCGAGGT |
| E-cadherin | GCTGATCGGGAGGGTGAATC | GAGCAGAAGAAGAGCAAGCAATAG |
| N-cadherin | ACAGCCGTGTGTGAAAATGC | ATCCCCGCTGTGTTGTTTCT |
| Vimentin | GGCGAGGAGAGCAGGATTTC | TGGGTATCAACCAGAGGGAGT |
| VE-cadherin | TTTGCCATCCAAGGGGAGTC | TCTCATAGTCCAGGGGCTTTT |
| FN | CCGCCGAATGTAGGACAAGA | CCACTCATCTCCAACGGCAT |
| STAT3 | ACCAGCAGTATAGCCGCTTC | GCCACAATCCGGGCAATCT |
| VEGFA | GGGCAGAATCATCACGAAGT | TGGTGATGTTGGACTCCTCA |
| VEGFR1 | AATCATTCCGAAGCAAGGTGTG | AGCTTGTAGGTGGCAACATGAA |
| VEGFR2 | TGCCTACCTCACCTGTTTCC | CGTCTGGTTGTCATCTGGGA |
| Smad4 | CCTGTTCACAATGAGCTTGCAT | CCTACCTGAACATCCATTTCAA |
| Smad5 | TGTTGGGCTGGAAACAAGGT | GCTGGGAGCTGAAATGGACT |
| HIF-1A | TGATGACCAGCAACTTGAGG | CTGGGGCATGGTAAAAGAAA |
| GAPDH | GATTTGGTCGTATTGGGCGC | TTCCCGTTCTCAGCCTTGAC |
| U6 | CGCTTCGGCAGCACATATACTA | CGCTTCACGAATTTGCGTGTCA |

Table S1: Sequences of the qRT-PCR primers used in this study

Table S2: Sequences of the siRNA, miR mimics and inhibitor used in this study

| **Gene name** | **Probe (5’-3’)** |
| --- | --- |
| Si-Circ4207-001 | AUCCCCAUUAGGUACUGUUGUTTACAACAGUACCUAAUGGGGAUTT |
| Si-Circ4207-002 | CCAUUAGGUACUGUUGUGGGUTTACCCACAACAGUACCUAAUGGTT |
| Si-Circ4207-003 | ACAUCAUCCCCAUUAGGUACUTTAGUACCUAAUGGGGAUGAUGUTT |
| miR-20b-5p-mimcis | CAAAGUGCUCAUAGUGCAGGUAG |
| miR-20b-5p-inhibitor | CUACCUGCACUAUGAGCACUUUG |
| miR-20b-5p-NC | ACCUGCACUAUGAGCACUUUGUU |

Table S3: Sequences of the FISH probes used in this study

| **Gene name** | **Probe (5’-3’)** |
| --- | --- |
| Circ4207 | TCCAACATCATCCCCATTAGGTAC |
| miR-20b-5p | ACTTCGGGGATTTGAGGTATTCAT |
