# Supplementary material for: Circ4207 regulates vasculogenic mimicry formation in colorectal cancer through the miR-20b-5p/VEGFA axis
Source: Research Square preprint supplement (doi:10.21203/rs.3.rs-4395844/v1), 2024-05-23
Supplement: Supplementary file 2 [file 7ed02f928881e7eb59d29eba.docx]

**Additional file 1:**
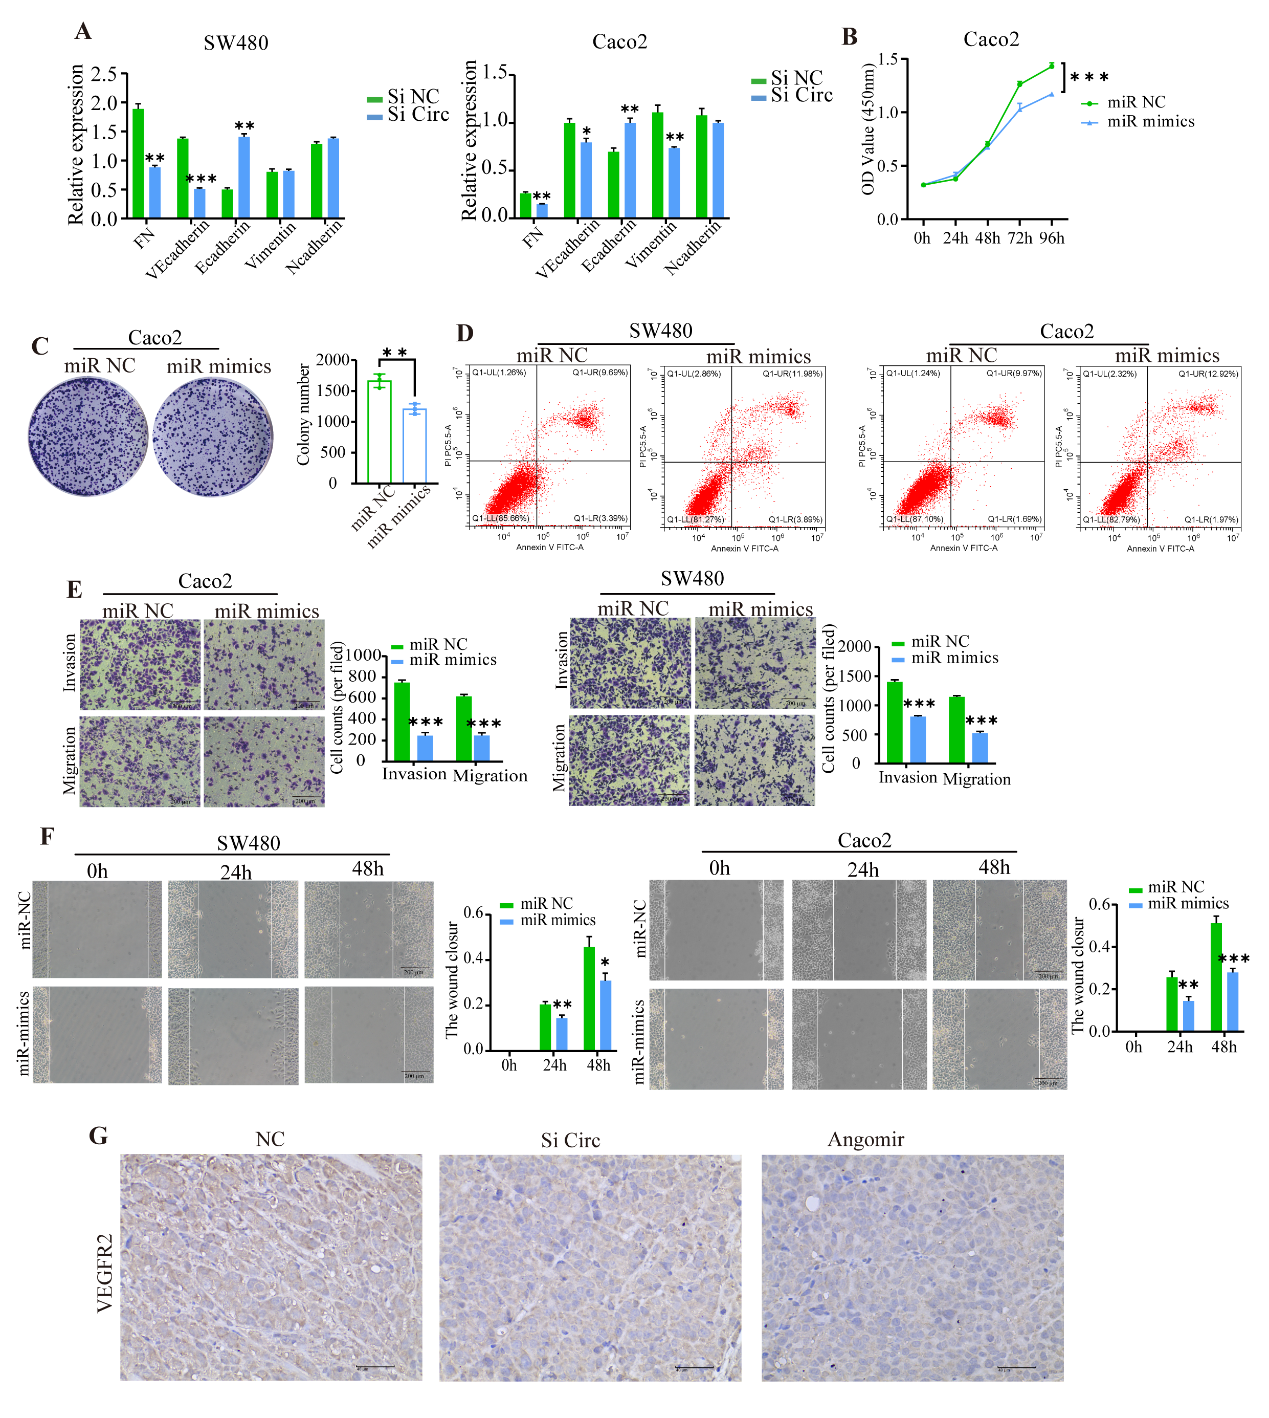


Fig.S1: **A** The expression of VM-related molecules was detected by qRT-PCR. **B-C** CCK8 assay and colony formation assay was used to detect proliferation ability. **D** The apoptosis was detected by flow cytometry. **E-F** Transwell and wound-healing assays were used to determine the migration and invasion abilities of the cells.

**G** The expression of VEGFR2 was detected by immunohistochemistry.
