# Supplementary material for: Circ4207 regulates vasculogenic mimicry formation in colorectal cancer through the miR-20b-5p/VEGFA axis
Source: Research Square preprint supplement (doi:10.21203/rs.3.rs-4395844/v1), 2024-05-23
Supplement: Supplementary file 3 [file beeab7c51f1aecc39c6de95b.docx]

**PAGE**

**Fig.1E**







**Fig.1F**







**WB Si Circ4207(SW480) Fig.6C**

**actin**

**
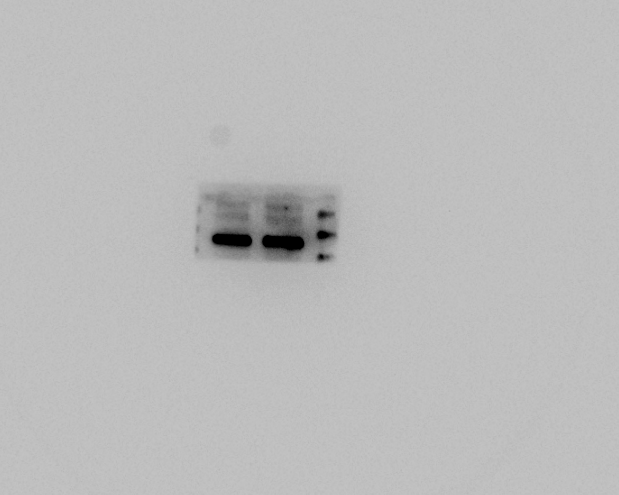

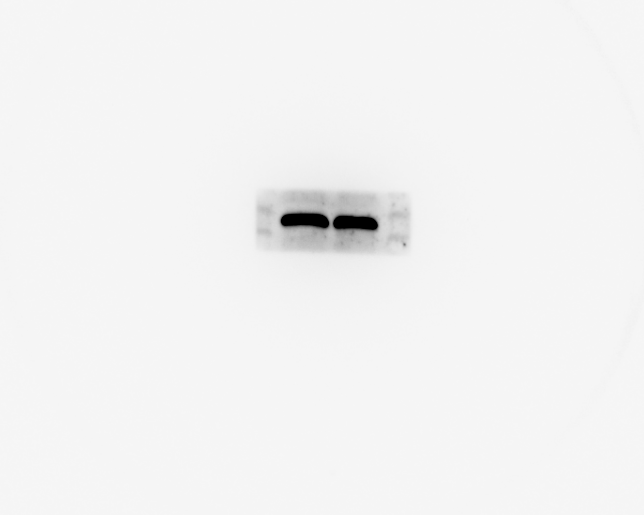
**

**VEGFA**

**
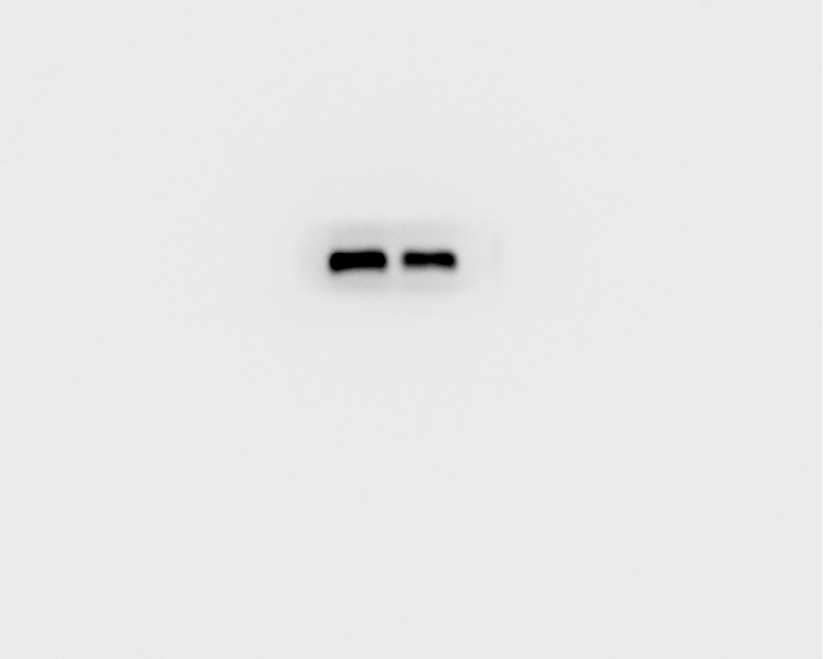

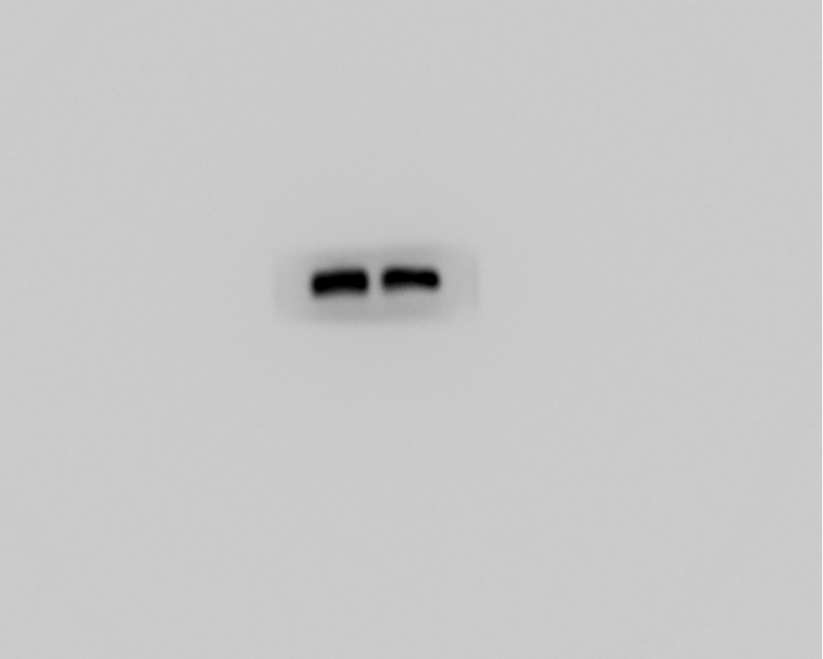

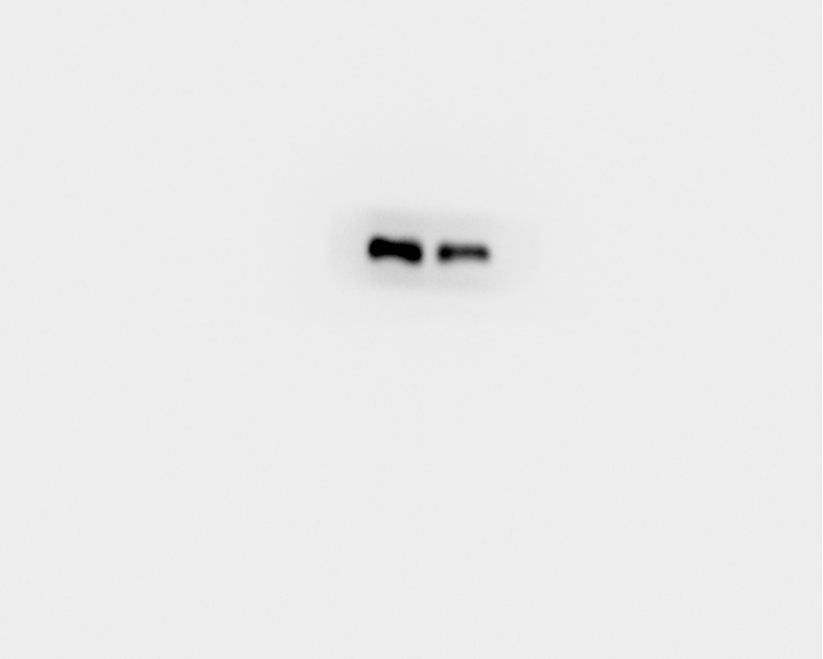
**

**VEGFR1**

**
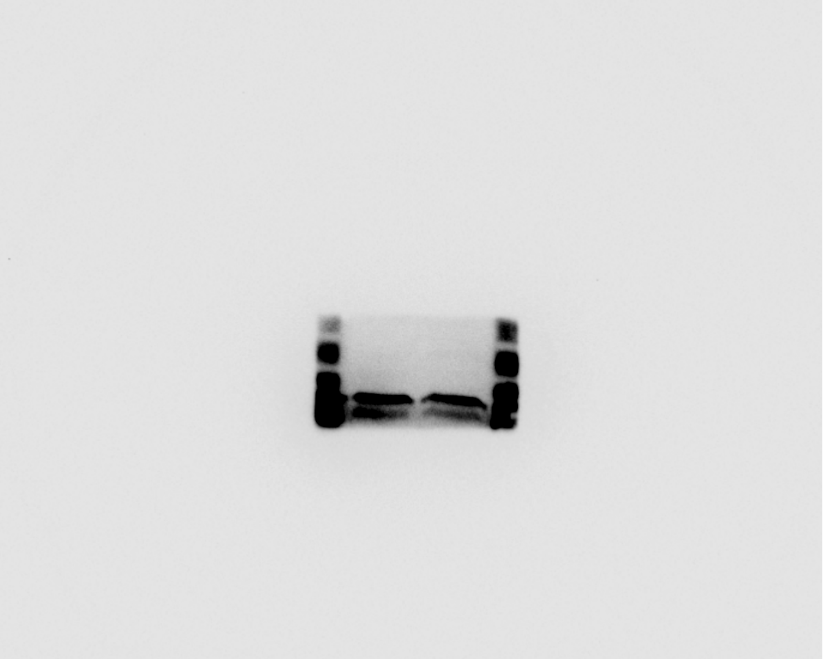

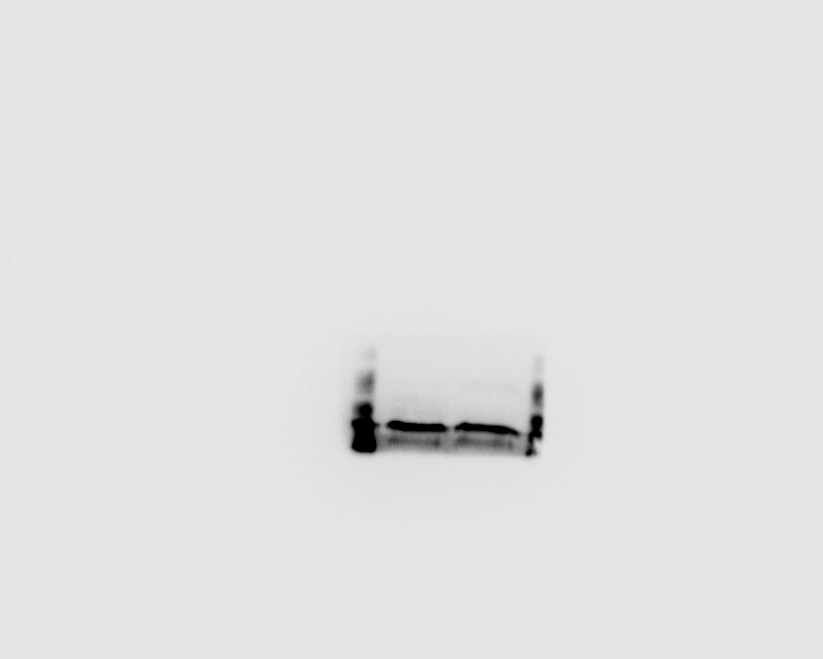

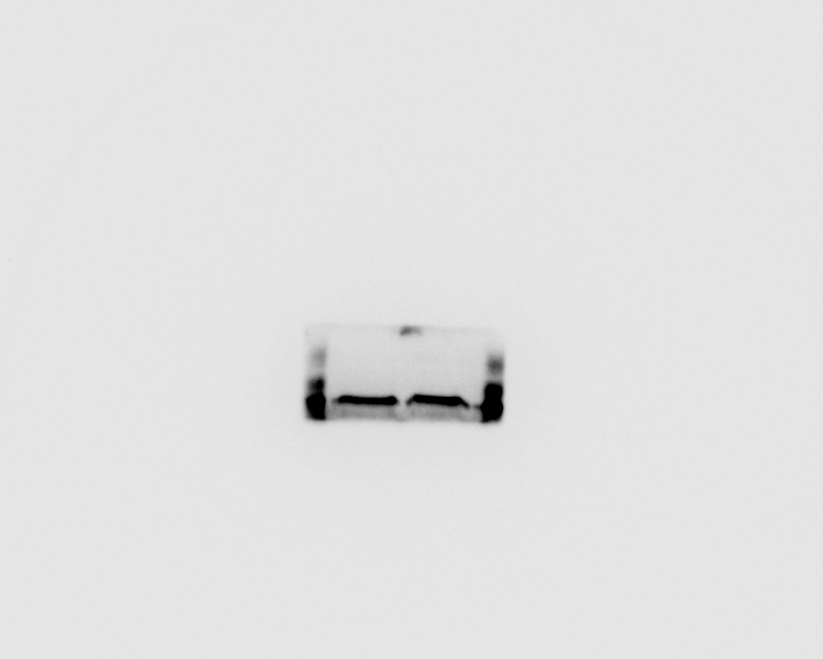
**

**VEGFR2**

**
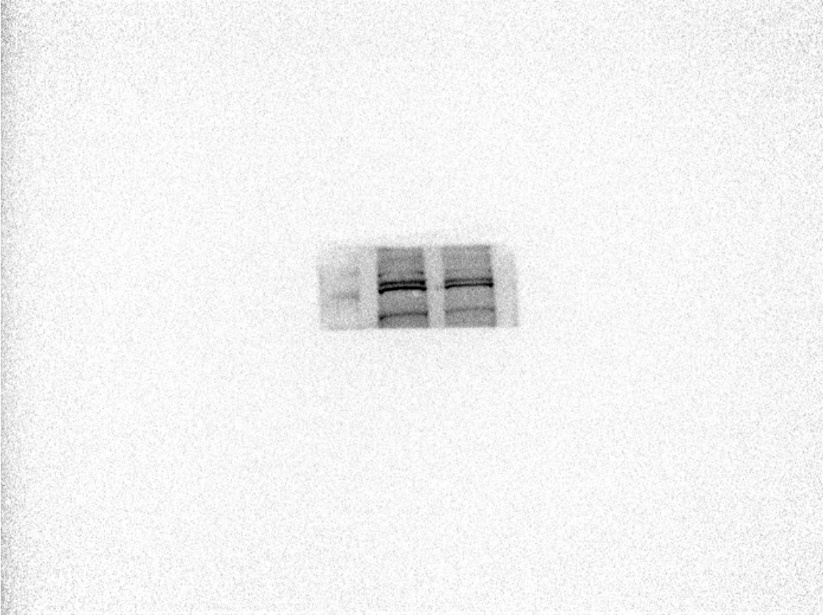

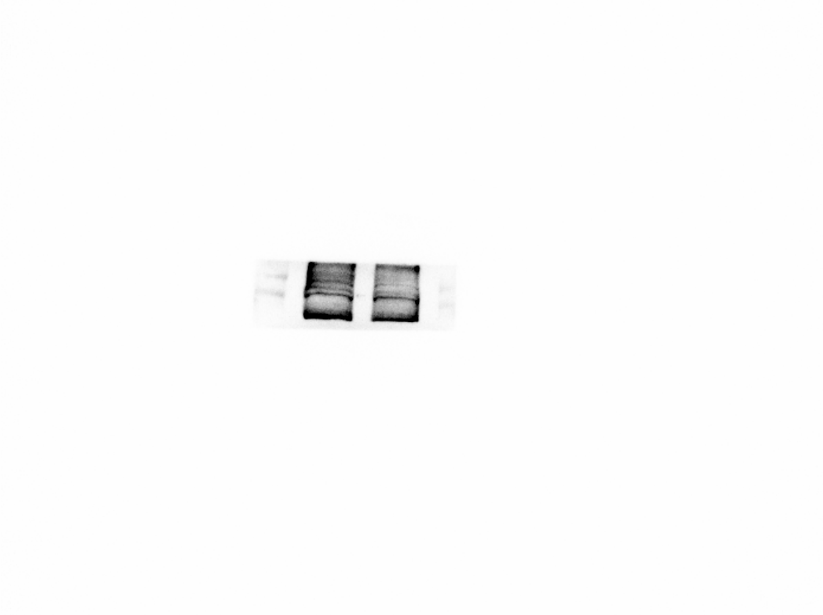

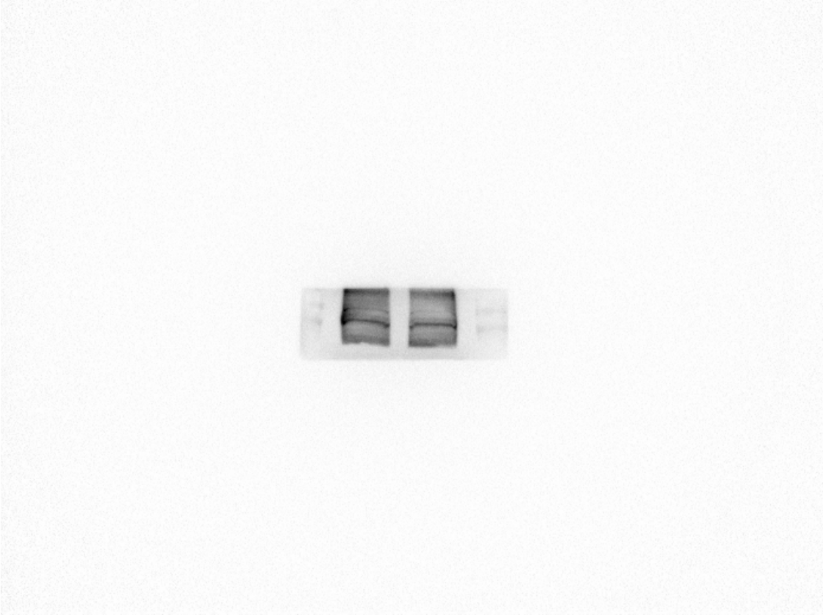
**

**WB-Si Circ4207(Caco2)**

**Actin**

**
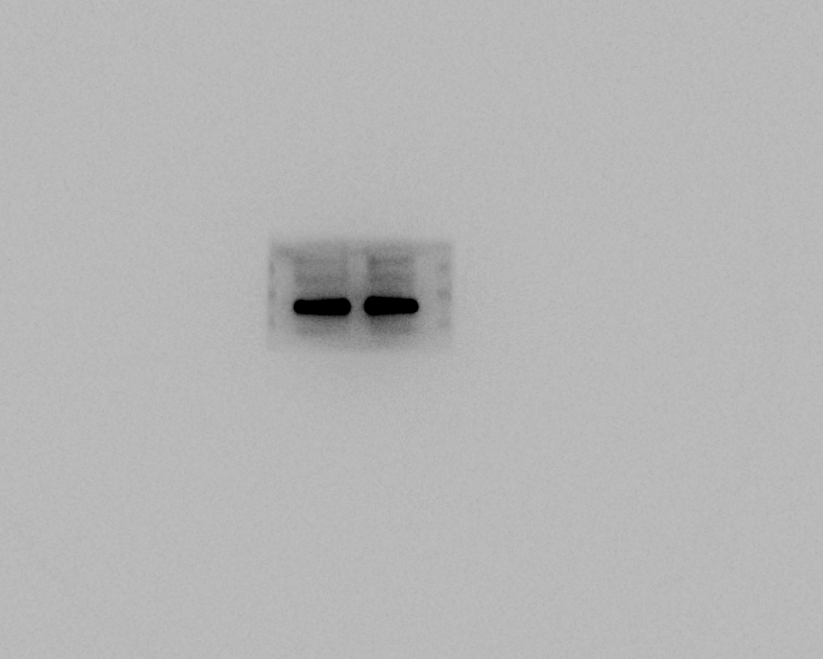

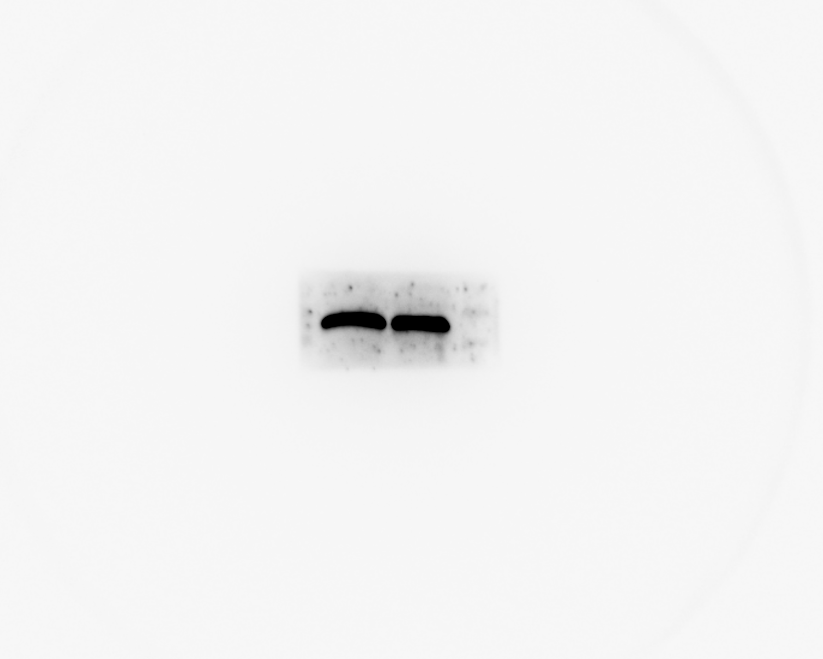
**

**VEGFA**

**
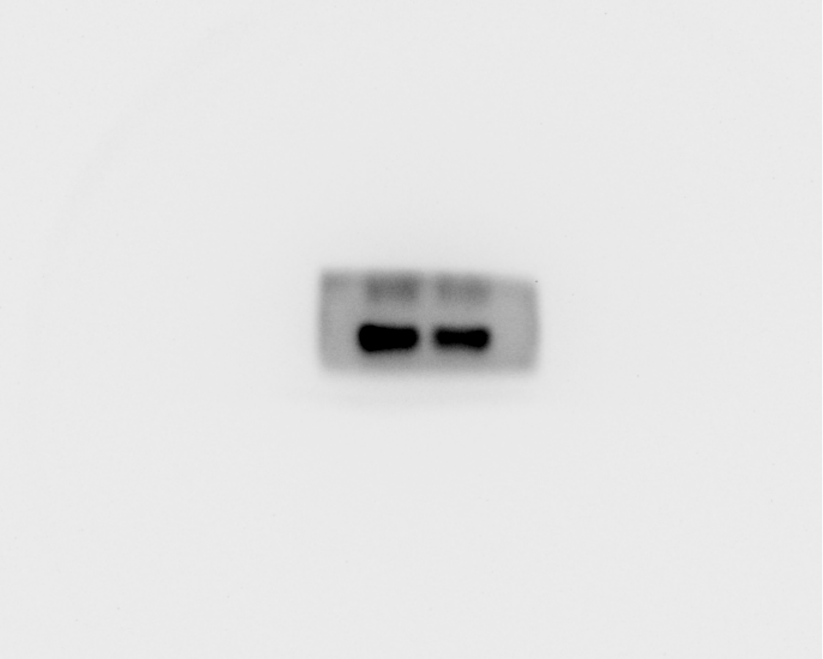

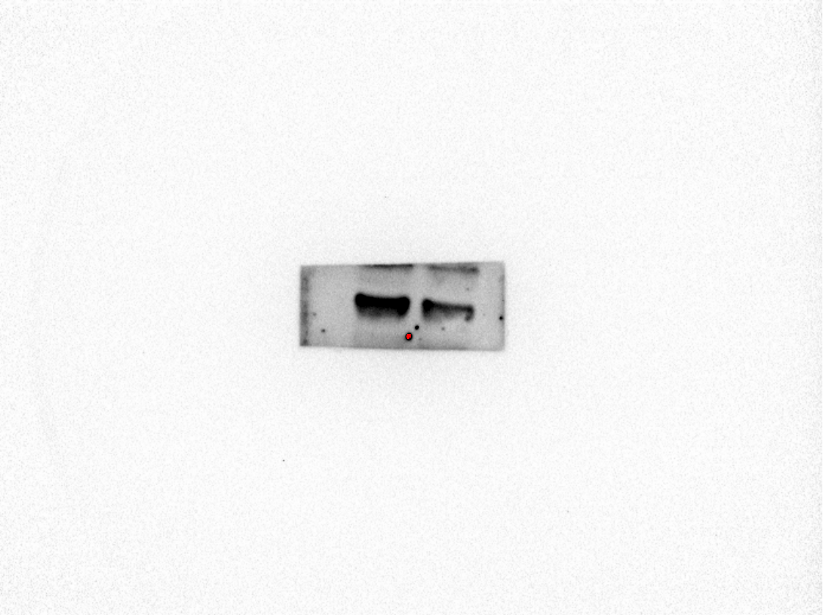

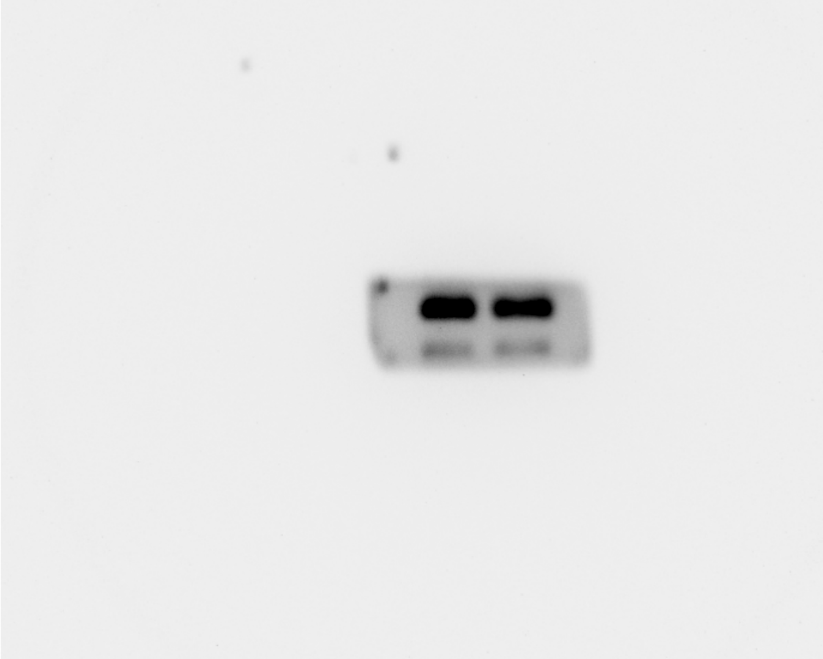
**

**VEGFR1**

**
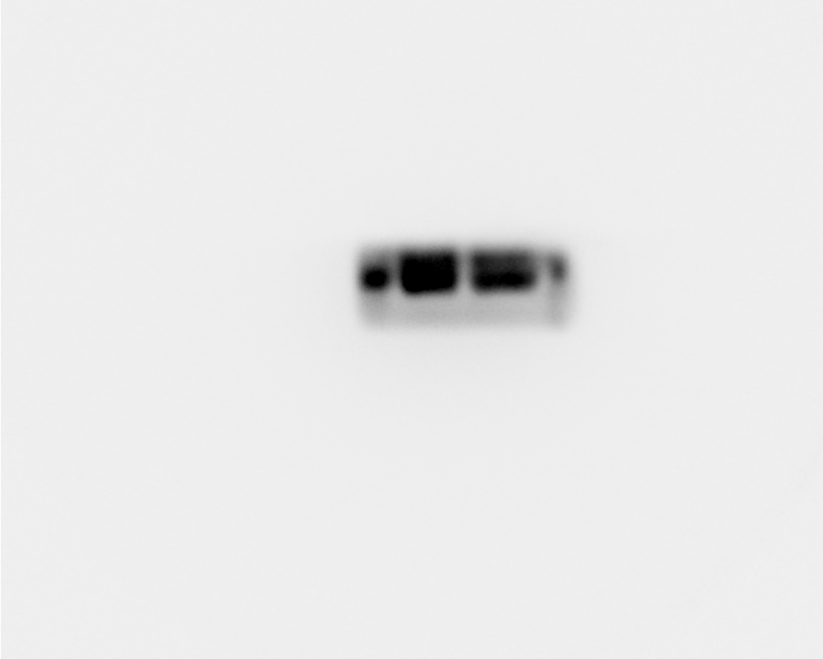

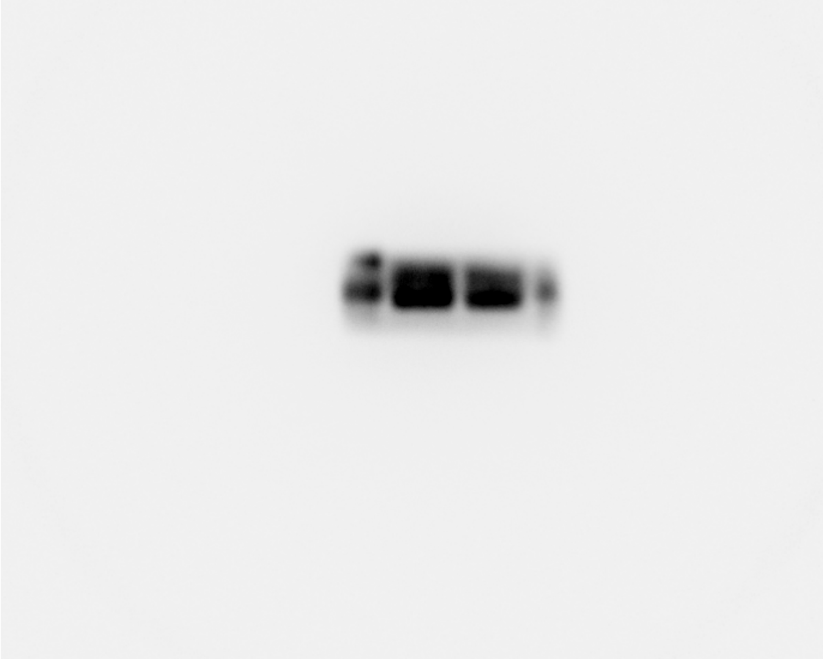

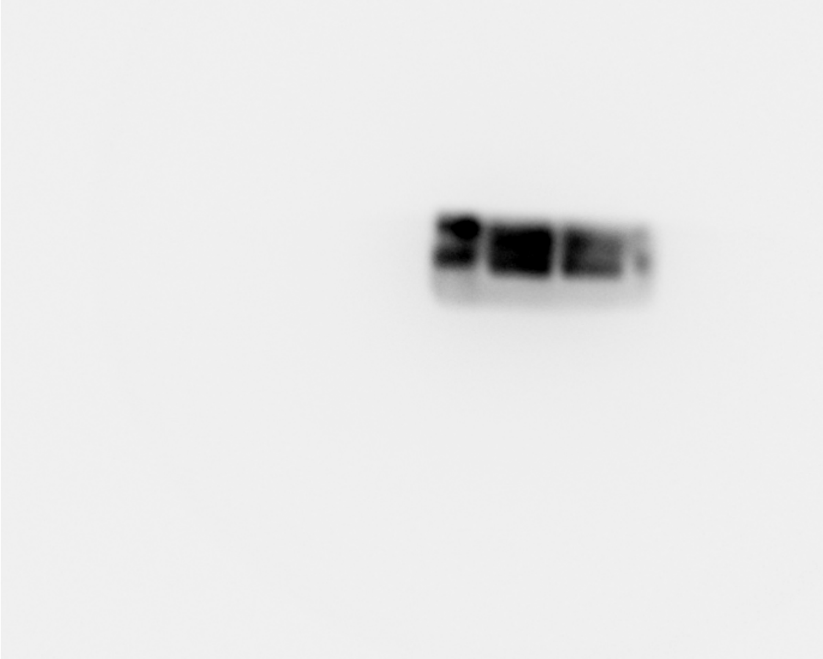
**

**VEGFR2**

**
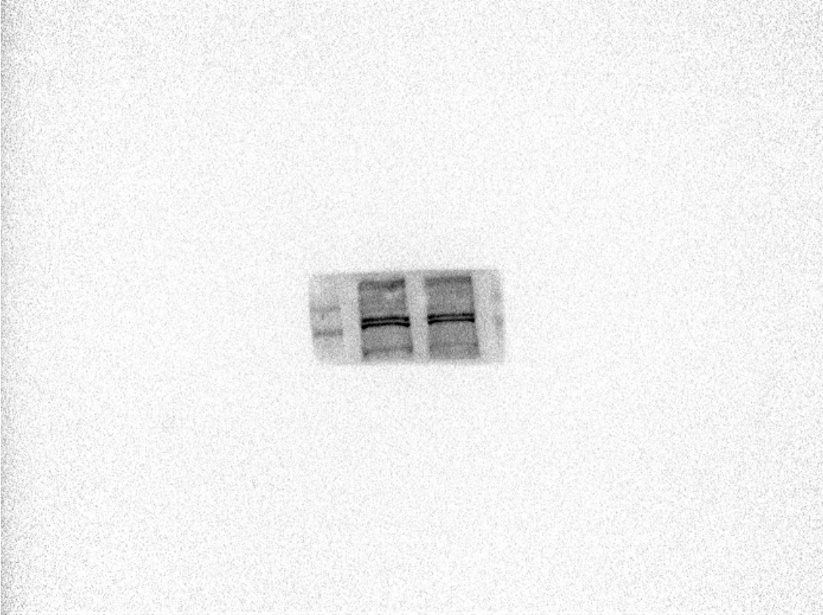

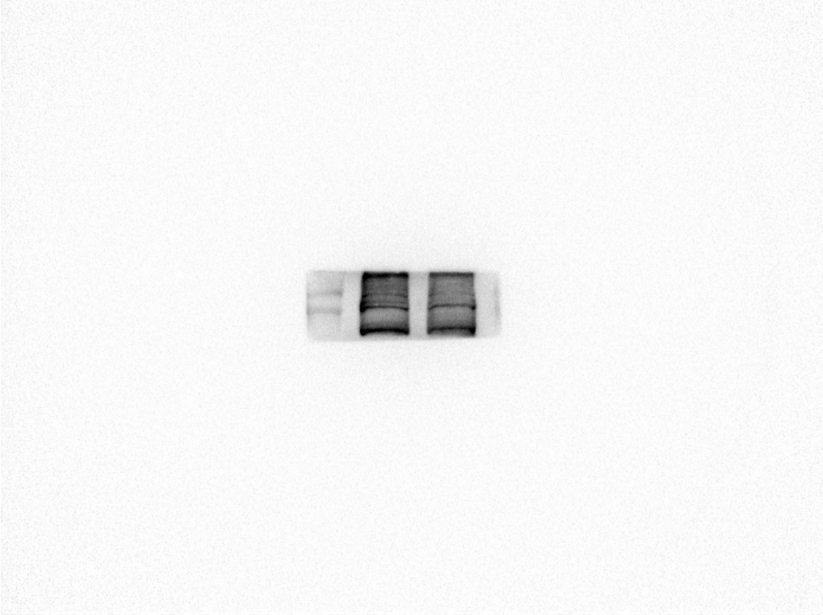

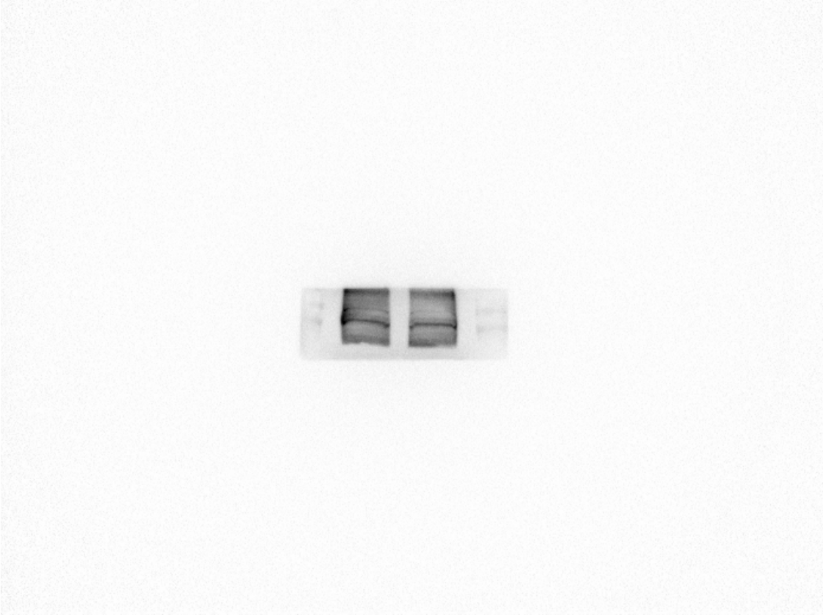
**

**WB miR mimics inhibitor (SW480) Fig.6D**

**Actin**

**
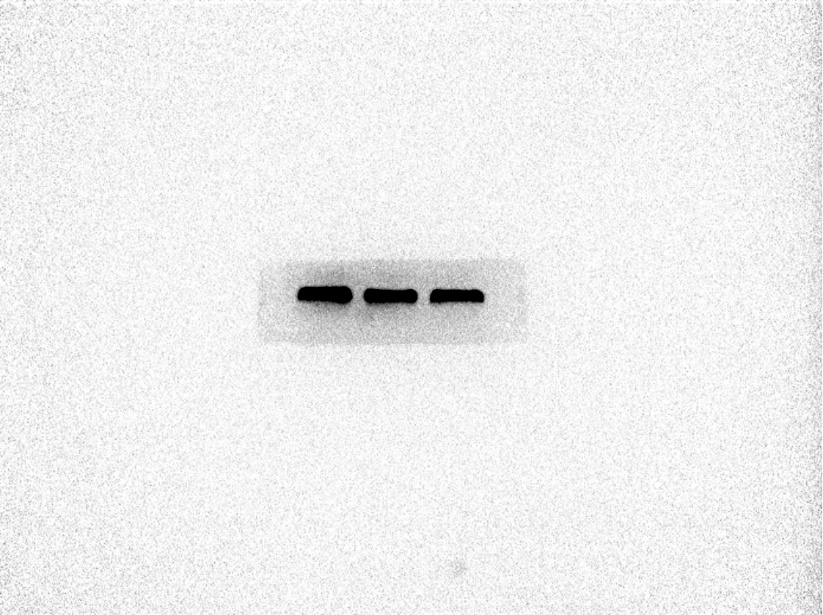
**

**VEGFA**

**
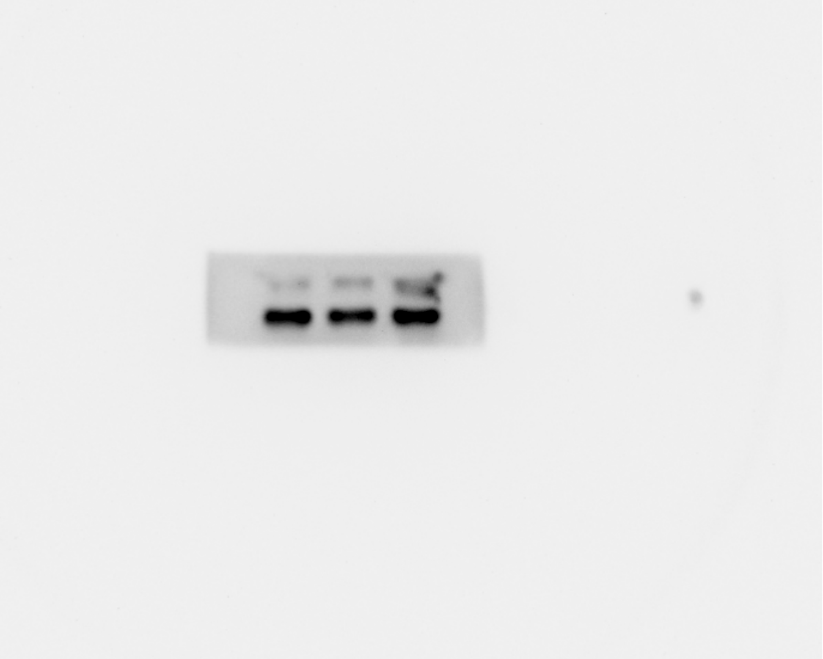

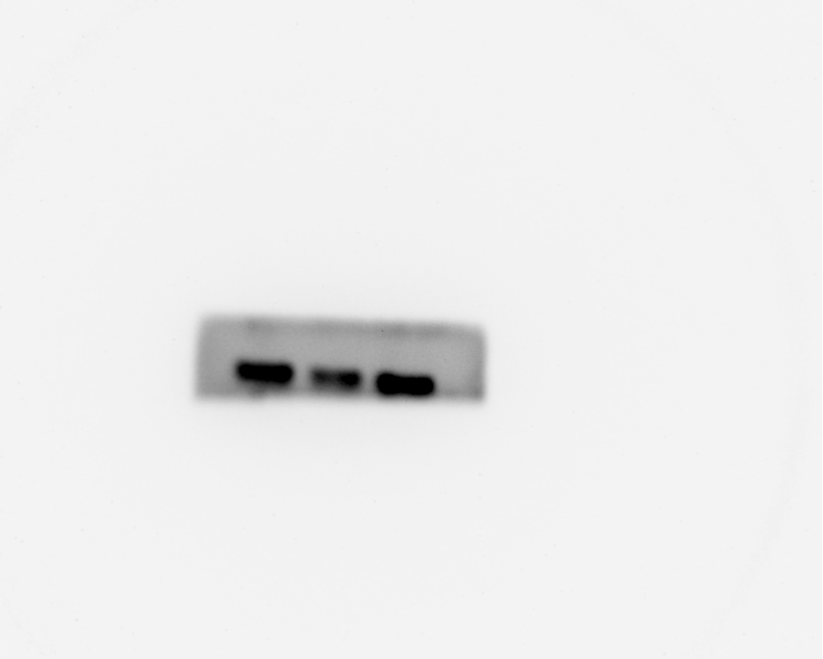

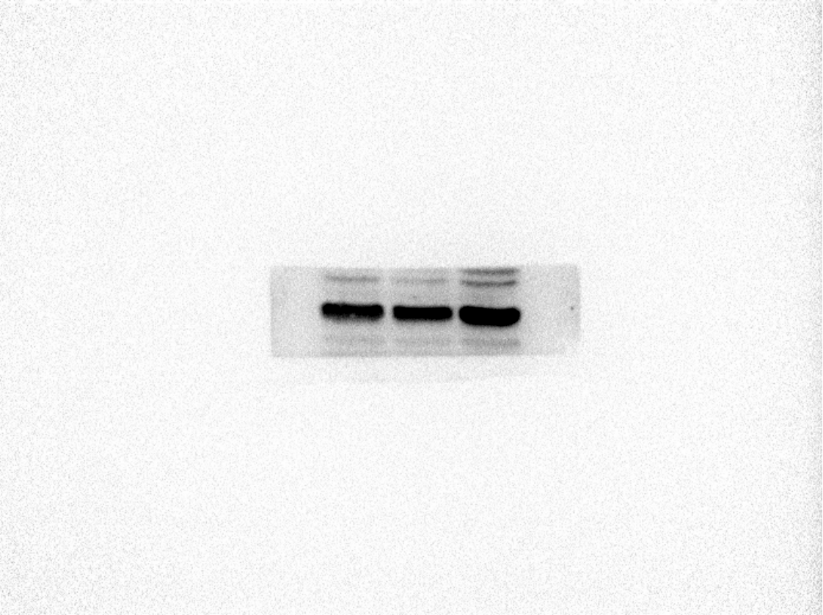
**

**VEGFR1**

**
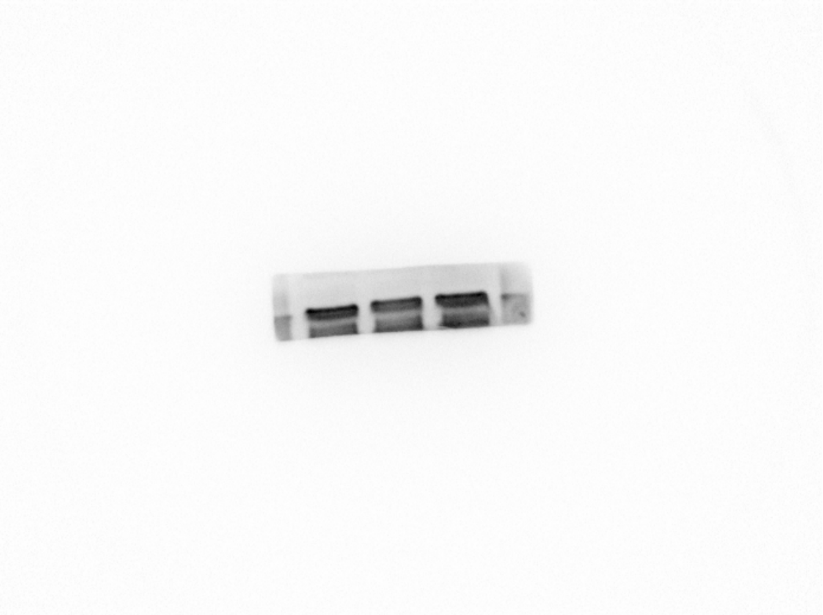

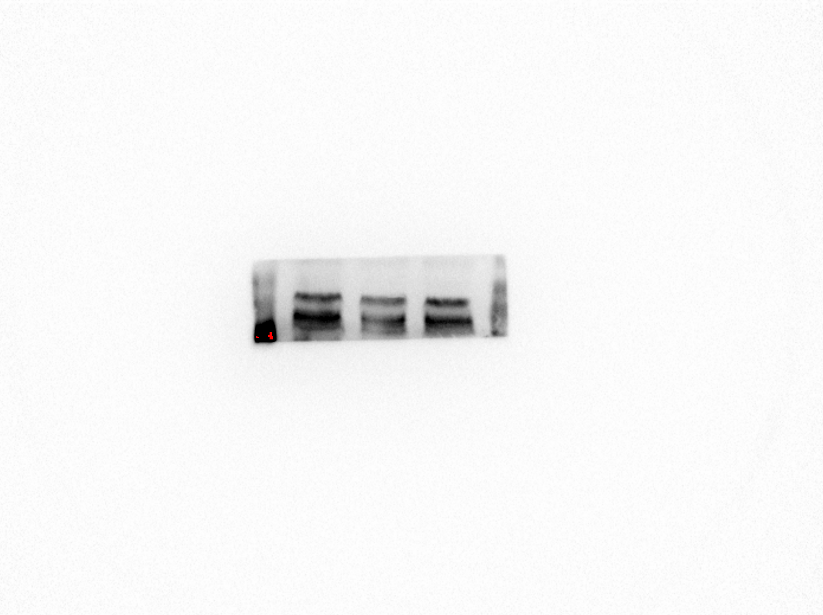

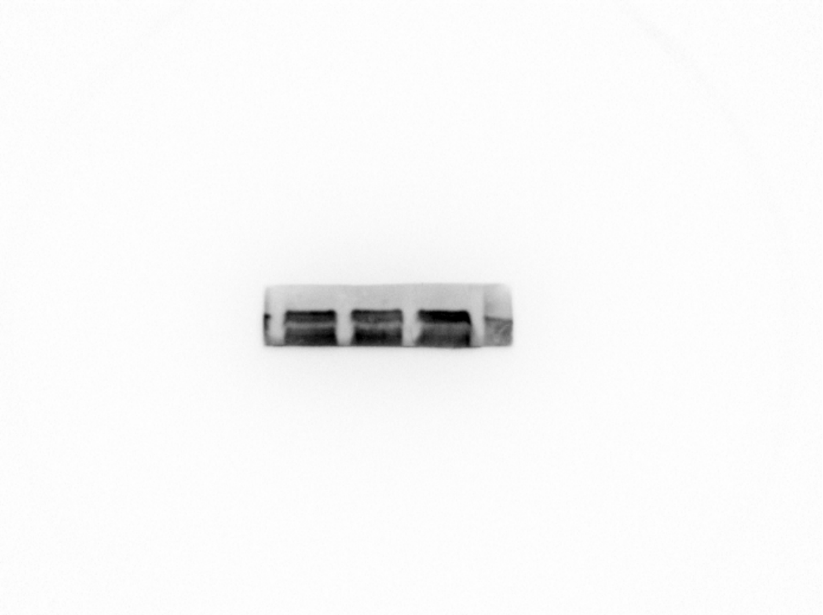
**

**VEGFR2**

**
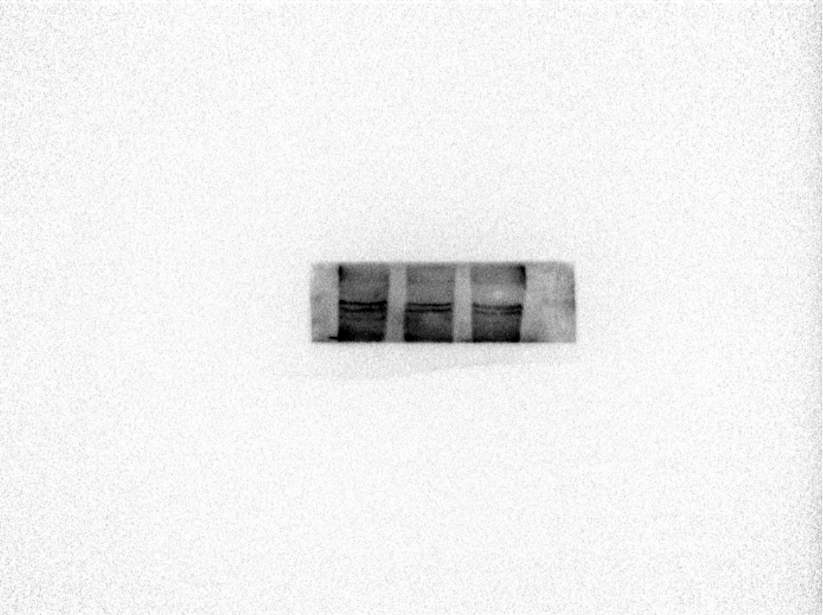

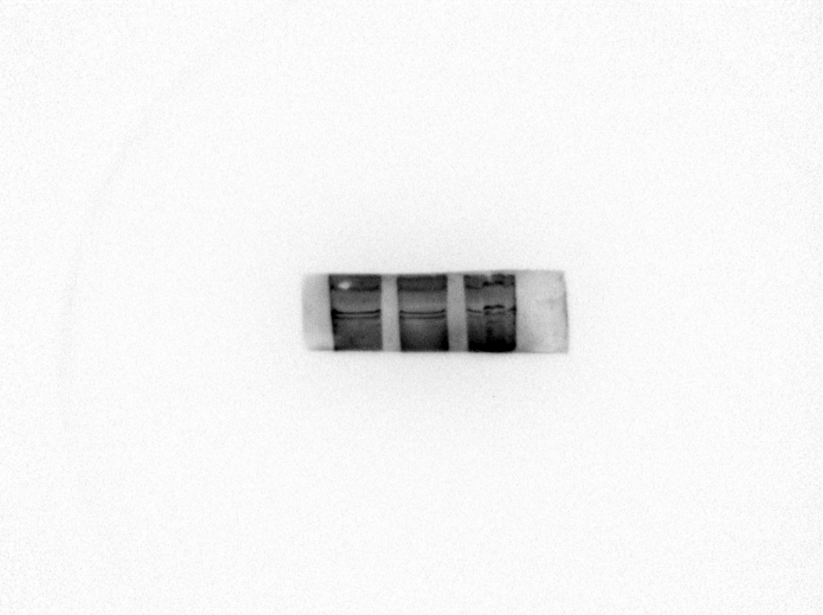

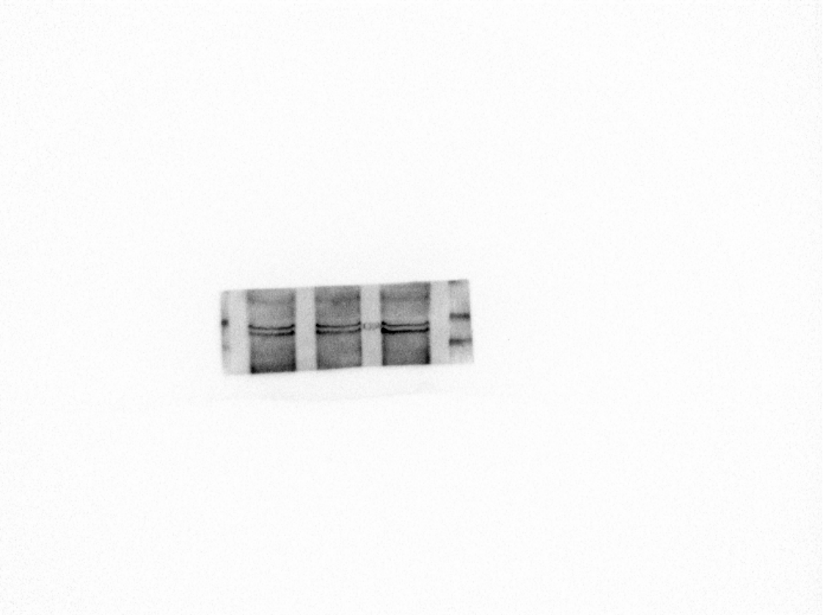

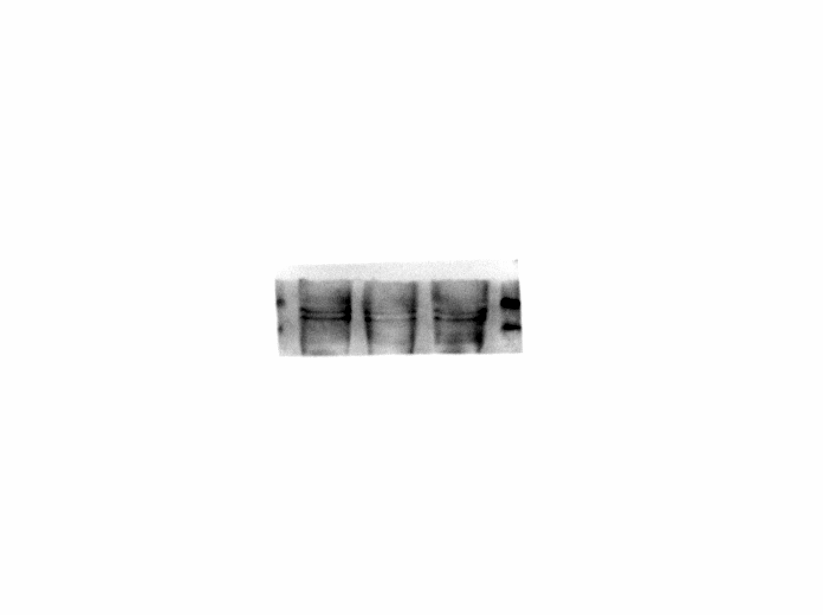
**

**WB-miR mimics inhibitor (Caco2)**

**Actin**

**
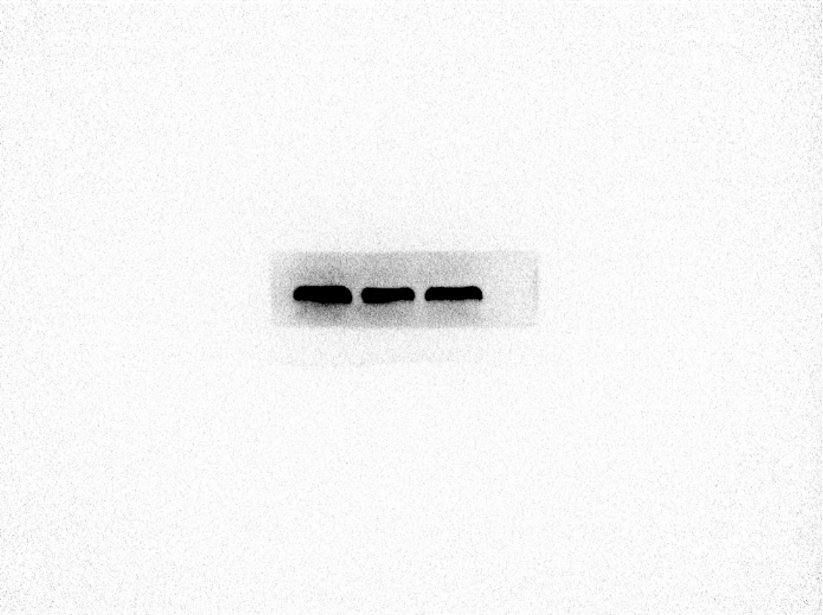
**

**VEGFA**

**
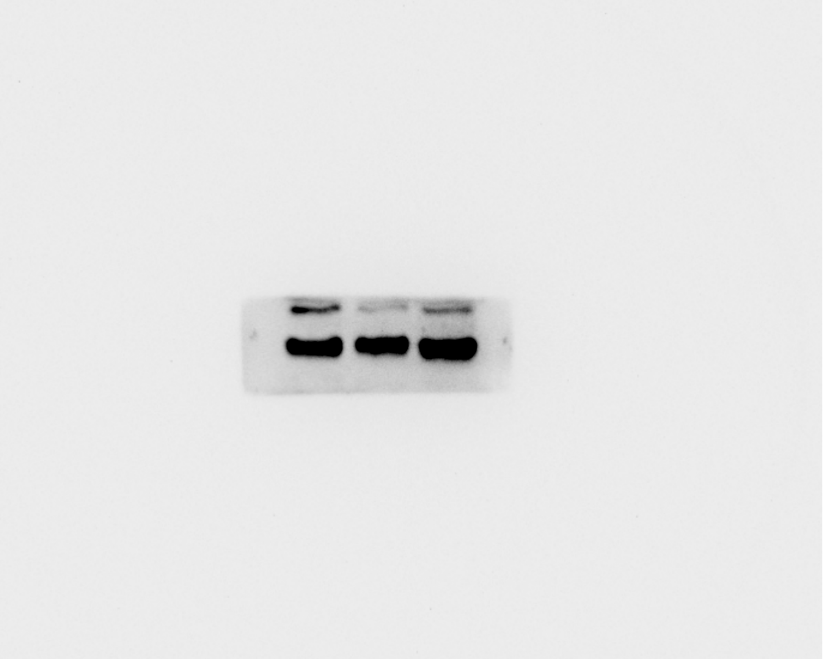

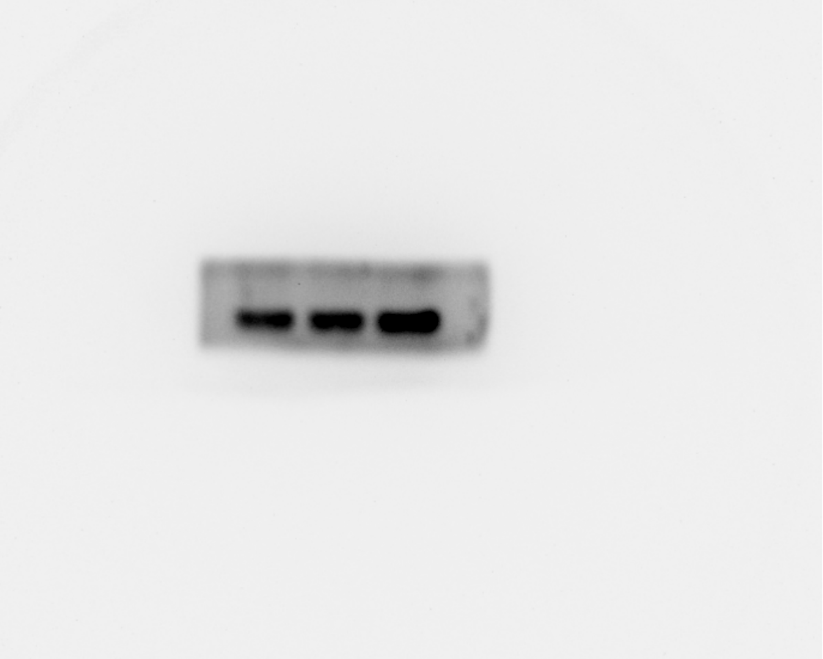

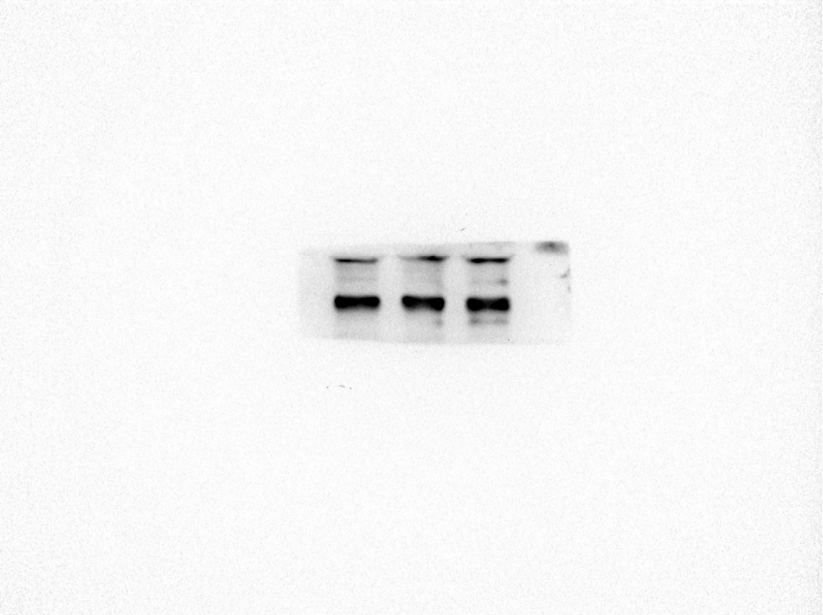
**

**VEGFR1**

**
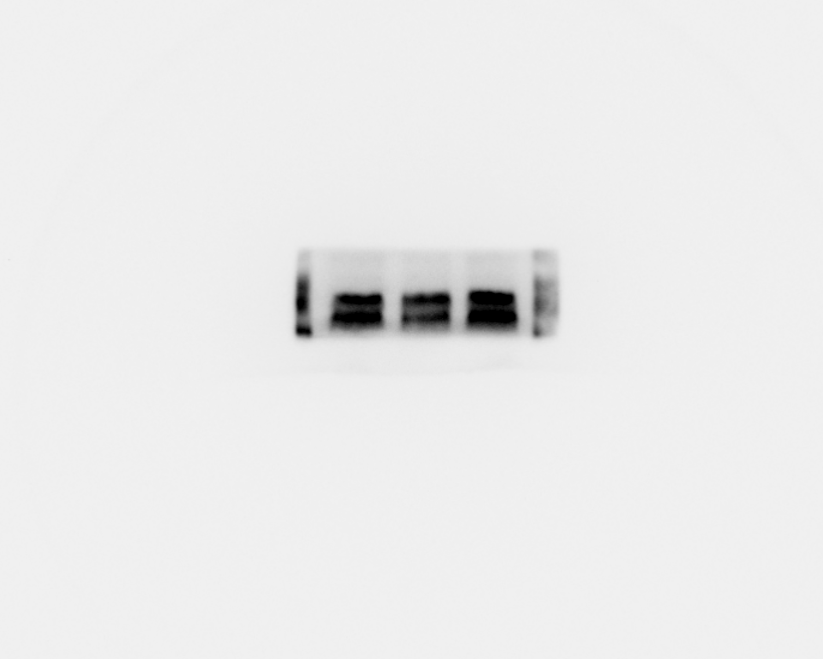

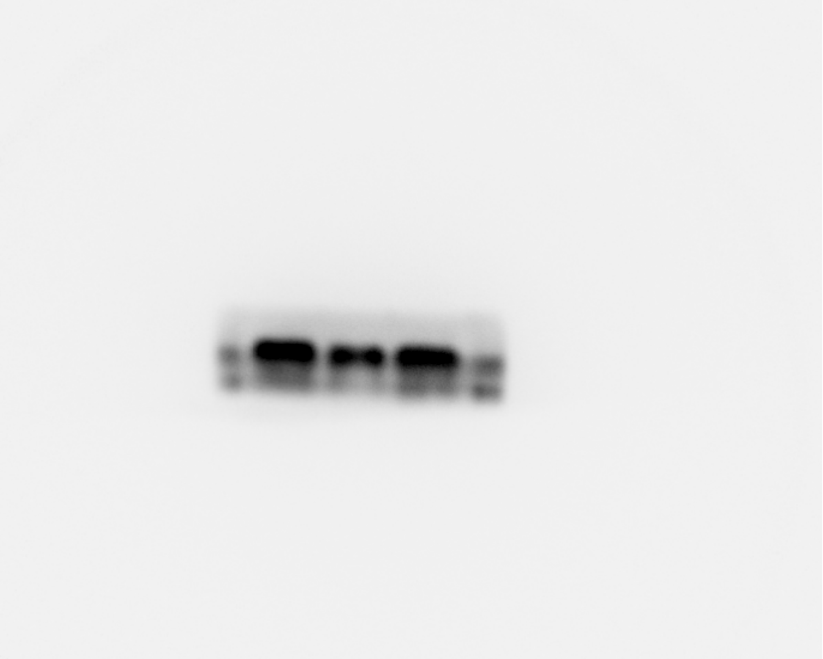

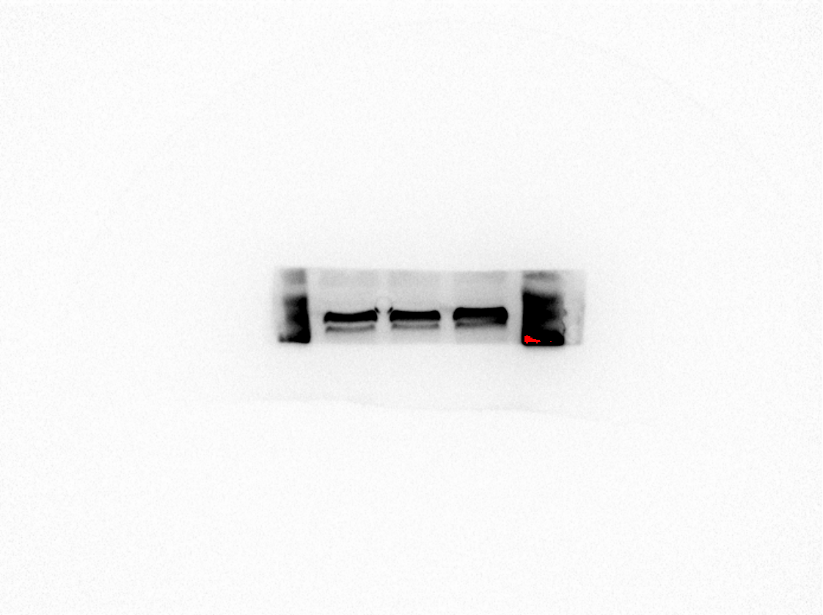
**

**VEGFR2**

**
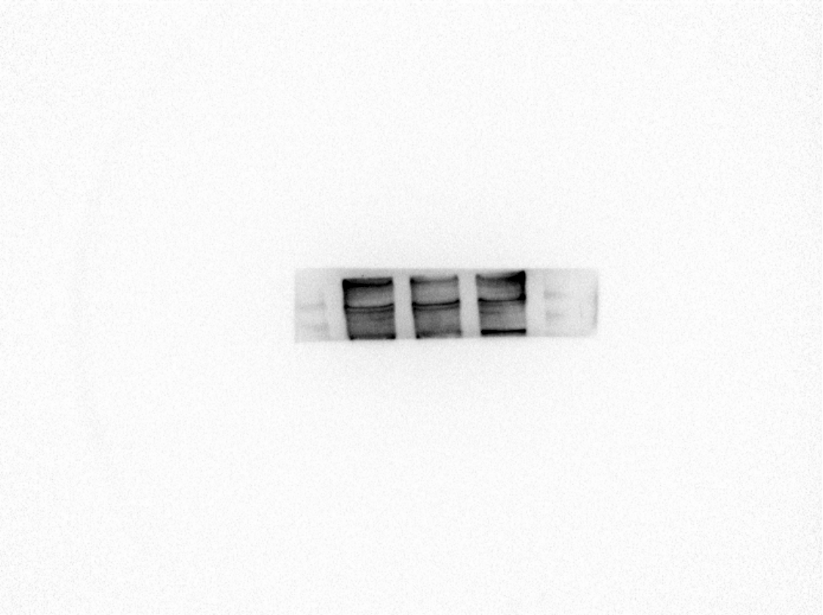

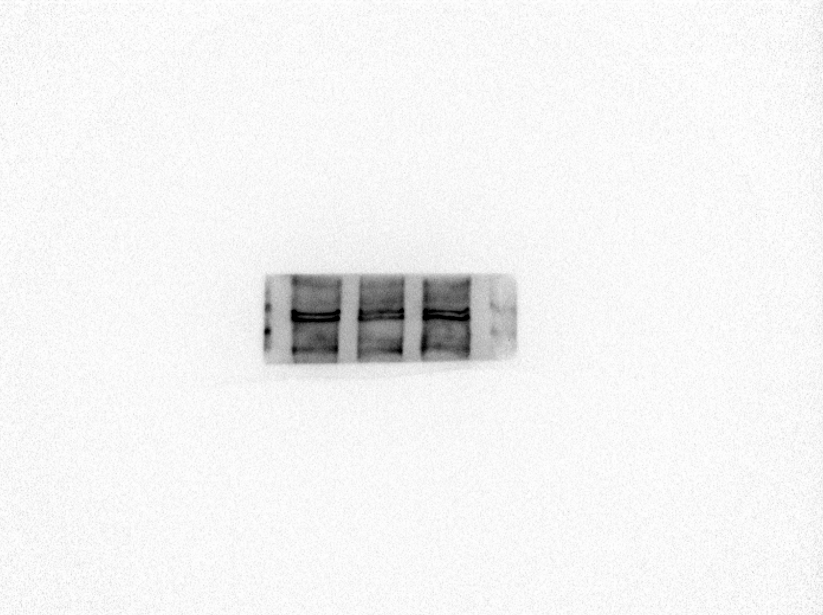

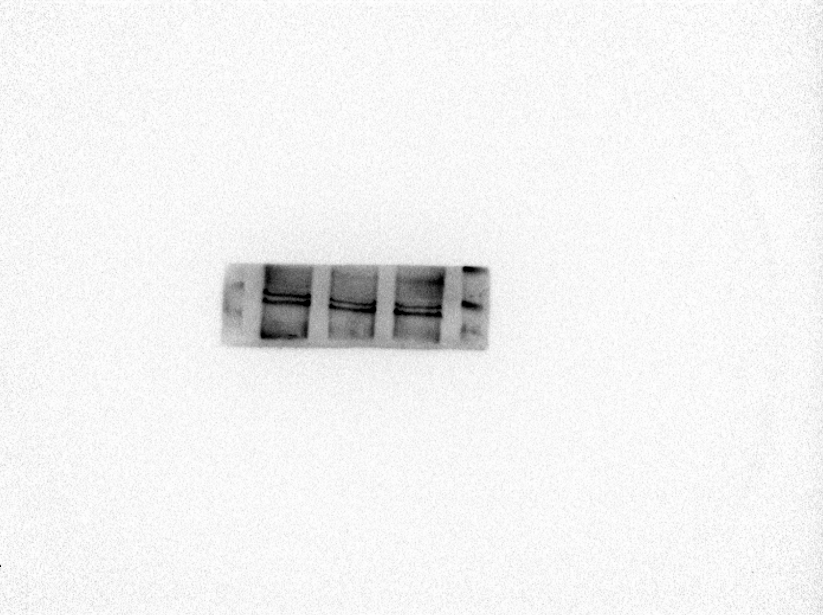
**
