# Supplementary material for: Circ4207 regulates vasculogenic mimicry formation in colorectal cancer through the miR-20b-5p/VEGFA axis
Source: Research Square preprint supplement (doi:10.21203/rs.3.rs-4395844/v1), 2024-05-23
Supplement: Supplementary file 4 [file c909891341a84385e1560064.xlsx]

## Sheet: Sheet1
Accession	CT3_srpbm	CT4_srpbm	CT5_srpbm	CT6_srpbm	CT7_srpbm	CT8_srpbm	CN3_srpbm	CN4_srpbm	CN5_srpbm	CN6_srpbm	CN7_srpbm	CN8_srpbm	log2FoldChange	regulation	pvalue	qvalue	significant	chr	start	end	strand	exon Count	circType	isoformName	geneName	flankIntron	gene Discription
circRNA286	388.894	504.071	374.978	293.14	596.7	573.398	1378.1	7025.2	3905.91	3523.31	8753.7	4788.99	-3.427	down	0	0	yes	chr12	108652272	108654410	-	2	circRNA	ENST00000261401	CORO1C	chr12:108649020-108652271|chr12:108654410-108657303	coronin 1C [Source:HGNC Symbol;Acc:HGNC:2254]
circRNA21555	0	0	0	0	0	0	0	1056.89	556.095	631.04	1252.98	682.153	-inf	down	0	0	yes	chr6	170358226	170395579	+	4	circRNA	ENST00000630384	FAM120B	chr6:170348323-170358225|chr6:170395579-170404549	family with sequence similarity 120B [Source:HGNC Symbol;Acc:HGNC:21109]
circRNA6869	0	64.6245	0	69.7952	78.5132	53.3393	61.9373	1056.89	436.932	588.971	772.386	654.31	-3.74553	down	0	0	yes	chr2	40428473	40430301	-	1	circRNA	ENST00000403092	SLC8A1	chr2:40178493-40428472|chr2:40430301-40512348	solute carrier family 8 member A1 [Source:HGNC Symbol;Acc:HGNC:11068]
circRNA13628	0	0	0	0	15.7026	0	0	3932.25	3045.28	2566.23	4359.69	3007.04	-10.0727	down	0	0	yes	chr4	150467673	150491035	-	4	circRNA	ENST00000510413	LRBA	chr4:150436864-150467672|chr4:150491035-150588047	LPS responsive beige-like anchor protein [Source:HGNC Symbol;Acc:HGNC:1742]
circRNA1599	388.894	529.921	245.675	167.508	172.729	266.697	0	0	13.2404	0	17.1641	13.9215	5.32061	up	0	0	yes	chr7	22308339	22318037	-	4	circRNA	ENST00000344041	RAPGEF5	chr7:22291241-22308338|chr7:22318037-22356829	Rap guanine nucleotide exchange factor 5 [Source:HGNC Symbol;Acc:HGNC:16862]
circRNA1173	180.558	0	38.7908	69.7952	15.7026	66.6741	247.749	1507.62	662.018	757.248	549.252	1475.68	-3.80688	down	0	0	yes	chr14	54702062	54702580	+	1	circRNA	ENST00000554335	SAMD4A	chr14:54568112-54702061|chr14:54702580-54737023	sterile alpha motif domain containing 4A [Source:HGNC Symbol;Acc:HGNC:23023]
circRNA3344	13.8891	103.399	0	13.959	0	40.0045	77.4216	885.921	794.422	673.11	497.76	556.86	-4.34717	down	0	0	yes	chr9	35546430	35548535	+	1	circRNA	ENST00000361226	RUSC2	chr9:35490172-35546429|chr9:35548535-35555059	RUN and SH3 domain containing 2 [Source:HGNC Symbol;Acc:HGNC:23625]
circRNA3255	41.6672	12.9249	12.9303	0	0	0	15.4843	1072.43	675.258	494.315	1081.34	793.525	-5.93545	down	0	0	yes	chr1	203707009	203708104	+	2	circRNA	ENST00000357681	ATP2B4	chr1:203703813-203707008|chr1:203708104-203709300	ATPase plasma membrane Ca2+ transporting 4 [Source:HGNC Symbol;Acc:HGNC:817]
circRNA3321	13.8891	0	0	0	31.4053	26.6697	0	683.869	609.057	494.315	1047.01	431.566	-5.50403	down	0	0	yes	chr9	16435555	16437524	-	1	circRNA	ENST00000380672	BNC2	chr9:16419649-16435554|chr9:16437524-16552529	basonuclin 2 [Source:HGNC Symbol;Acc:HGNC:30988]
circRNA22371	0	0	0	0	0	0	0	264.222	397.211	210.347	360.447	69.6074	-inf	down	0	0	yes	chr2	40139401	40177855	-	5	circRNA	ENST00000406785	SLC8A1	chr2:40115629-40139400|chr2:40177855-40428472	solute carrier family 8 member A1 [Source:HGNC Symbol;Acc:HGNC:11068]
circRNA16594	0	0	0	0	0	0	92.9059	217.595	172.125	126.208	377.611	125.293	-inf	down	0	0	yes	chr10	92893349	92899644	+	4	circRNA	ENST00000371552	EXOC6	chr10:92834824-92893348|chr10:92899644-92909426	exocyst complex component 6 [Source:HGNC Symbol;Acc:HGNC:23196]
circRNA19811	0	0	0	0	0	0	0	559.529	450.172	105.173	514.924	348.037	-inf	down	0	0	yes	chr10	95351209	95384285	-	10	circRNA	ENST00000371227	SORBS1	chr10:95346452-95351208|chr10:95384285-95397219	sorbin and SH3 domain containing 1 [Source:HGNC Symbol;Acc:HGNC:14565]
circRNA2874	41.6672	116.324	64.6514	97.7132	15.7026	66.6741	201.296	1227.86	940.066	483.798	1115.67	668.231	-3.52527	down	0	0	yes	chr2	207976651	207977586	-	1	circRNA	ENST00000427836	PLEKHM3	chr2:207946512-207976650|chr2:207977586-208001029	pleckstrin homology domain containing M3 [Source:HGNC Symbol;Acc:HGNC:34006]
circRNA19679	0	0	0	0	0	0	0	1227.86	1615.32	1114.84	2025.37	0	-inf	down	0	0	yes	chr10	29512735	29531288	-	7	circRNA	ENST00000375400	SVIL	chr10:29499263-29512734|chr10:29531288-29550596	supervillin [Source:HGNC Symbol;Acc:HGNC:11480]
circRNA3008	152.78	38.7747	64.6514	41.8771	94.2159	66.6741	526.467	1865.1	979.787	999.147	1733.58	1350.38	-4.02162	down	0	0	yes	chr1	33294937	33295305	+	2	circRNA	ENST00000539719	ZNF362	chr1:33281811-33294936|chr1:33295305-33298929	zinc finger protein 362 [Source:HGNC Symbol;Acc:HGNC:18079]
circRNA11828	0	0	0	27.9181	0	0	0	466.274	423.692	315.52	532.088	348.037	-6.22313	down	0	0	yes	chr5	228185	233645	+	3	circRNA	ENST00000264932	SDHA	chr5:226047-228184|chr5:233645-235143	succinate dehydrogenase complex flavoprotein subunit A [Source:HGNC Symbol;Acc:HGNC:10680]
circRNA10823	0	0	25.8605	13.959	62.8106	53.3393	123.875	1460.99	675.258	757.248	1081.34	1308.62	-5.11558	down	0	0	yes	chr8	22196680	22197420	+	2	circRNA	ENST00000306385	BMP1	chr8:22195587-22196679|chr8:22197420-22201802	bone morphogenetic protein 1 [Source:HGNC Symbol;Acc:HGNC:1067]
circRNA1266	69.4453	12.9249	0	41.8771	31.4053	93.3438	201.296	1041.35	556.095	368.107	909.699	570.781	-3.87264	down	0	0	yes	chr19	11178345	11178720	-	2	circRNA	ENST00000586659	KANK2	chr19:11176817-11178344|chr19:11178720-11192830	KN motif and ankyrin repeat domains 2 [Source:HGNC Symbol;Acc:HGNC:29300]
circRNA1809	41.6672	51.6996	116.372	27.9181	78.5132	80.009	278.718	1274.48	675.258	1051.73	1252.98	849.211	-3.76402	down	0	0	yes	chr7	158759486	158764853	-	5	circRNA	ENST00000251527	ESYT2	chr7:158749723-158759485|chr7:158764853-158767653	extended synaptotagmin 2 [Source:HGNC Symbol;Acc:HGNC:22211]
circRNA1287	13.8891	38.7747	51.7211	55.8361	0	26.6697	108.39	885.921	529.614	641.558	1270.15	501.174	-4.39676	down	0	0	yes	chr19	18539371	18539720	-	2	circRNA	ENST00000597960	FKBP8	chr19:18538436-18539370|chr19:18539720-18541678	FK506 binding protein 8 [Source:HGNC Symbol;Acc:HGNC:3724]
circRNA2224	55.5563	25.8498	12.9303	55.8361	109.918	106.679	232.265	730.497	383.97	704.662	1287.31	821.368	-3.50366	down	0	0	yes	chr4	38089932	38103157	+	3	circRNA	ENST00000508802	TBC1D1	chr4:38054338-38089931|chr4:38103157-38115709	TBC1 domain family member 1 [Source:HGNC Symbol;Acc:HGNC:11578]
circRNA5736	0	51.6996	12.9303	13.959	15.7026	0	30.9686	1663.05	979.787	1156.91	1252.98	1419.99	-6.10798	down	0	0	yes	chr7	5641154	5652510	-	2	circRNA	ENST00000425013	RNF216	chr7:5624125-5641153|chr7:5652510-5711760	ring finger protein 216 [Source:HGNC Symbol;Acc:HGNC:21698]
circRNA1409	83.3344	38.7747	0	41.8771	94.2159	106.679	572.92	1212.31	741.46	788.8	1373.13	696.074	-3.88337	down	0	0	yes	chr22	32478981	32479275	+	1	circRNA	ENST00000266087	FBXO7	chr22:32475124-32478980|chr22:32479275-32483896	F-box protein 7 [Source:HGNC Symbol;Acc:HGNC:13586]
circRNA9651	0	0	38.7908	0	0	26.6697	46.453	419.647	489.893	399.659	360.447	487.252	-5.07293	down	0	0	yes	chr5	114404438	114404856	+	1	circRNA	ENST00000512097	KCNN2	chr5:114364001-114404437|chr5:114404856-114463048	potassium calcium-activated channel subfamily N member 2 [Source:HGNC Symbol;Acc:HGNC:6291]
circRNA19456	0	0	0	0	0	0	0	419.647	370.73	452.246	257.462	153.136	-inf	down	0	0	yes	chr11	12496458	12513360	+	5	circRNA	ENST00000334956	PARVA	chr11:12477949-12496457|chr11:12513360-12513996	parvin alpha [Source:HGNC Symbol;Acc:HGNC:14652]
circRNA263	55.5563	12.9249	103.442	83.7542	78.5132	80.009	371.624	1616.42	1469.68	1461.91	2437.31	765.682	-4.29355	down	0	0	yes	chr12	82857010	82857580	+	1	circRNA	ENST00000551915	TMTC2	chr12:82687669-82857009|chr12:82857580-82895817	transmembrane and tetratricopeptide repeat containing 2 [Source:HGNC Symbol;Acc:HGNC:25440]
circRNA2347	69.4453	12.9249	12.9303	0	15.7026	0	170.328	435.189	450.172	294.485	635.073	375.88	-4.4108	down	0	0	yes	chr4	147857553	147881932	+	6	circRNA	ENST00000336498	ARHGAP10	chr4:147847222-147857552|chr4:147881932-147906637	Rho GTPase activating protein 10 [Source:HGNC Symbol;Acc:HGNC:26099]
circRNA19635	0	0	0	0	0	0	0	279.765	463.413	231.381	343.283	180.979	-inf	down	0	0	yes	chr10	1084403	1086357	+	2	circRNA	ENST00000358220	WDR37	chr10:1080476-1084402|chr10:1086357-1093451	WD repeat domain 37 [Source:HGNC Symbol;Acc:HGNC:31406]
circRNA19871	0	0	0	0	0	0	0	170.967	291.288	262.933	429.103	83.5289	-inf	down	0	0	yes	chr10	121538592	121565704	-	4	circRNA	ENST00000369061	FGFR2	chr10:121515319-121538591|chr10:121565704-121593708	fibroblast growth factor receptor 2 [Source:HGNC Symbol;Acc:HGNC:3689]
circRNA3322	27.7781	51.6996	38.7908	41.8771	47.1079	93.3438	61.9373	2113.78	1416.72	1251.56	2368.65	1461.76	-4.85086	down	0	0	yes	chr9	16727797	16738485	-	2	circRNA	ENST00000380672	BNC2	chr9:16583085-16727796|chr9:16738485-16870645	basonuclin 2 [Source:HGNC Symbol;Acc:HGNC:30988]
circRNA1360	13.8891	0	0	55.8361	78.5132	13.3348	108.39	1647.5	1032.75	1325.18	1115.67	1113.72	-5.29495	down	0	0	yes	chr18	44949881	44953340	+	1	circRNA	ENST00000282030	SETBP1	chr18:44869283-44949880|chr18:44953340-45038484	SET binding protein 1 [Source:HGNC Symbol;Acc:HGNC:15573]
circRNA2652	125.002	116.324	77.5816	41.8771	157.026	160.018	232.265	5548.67	3892.67	2766.06	3673.12	3842.33	-4.87969	down	0	0	yes	chr2	40428473	40430304	-	1	circRNA	ENST00000406785	SLC8A1	chr2:40177855-40428472|chr2:40430304-40451903	solute carrier family 8 member A1 [Source:HGNC Symbol;Acc:HGNC:11068]
circRNA9861	0	0	245.675	153.549	94.2159	173.353	0	3372.72	1734.49	1409.32	2729.1	849.211	-3.92023	down	0	0	yes	chr4	186706563	186709845	-	1	circRNA	ENST00000441802	FAT1	chr4:186663613-186706562|chr4:186709845-186723663	FAT atypical cadherin 1 [Source:HGNC Symbol;Acc:HGNC:3595]
circRNA2220	13.8891	0	0	0	0	0	0	792.666	569.335	283.968	532.088	139.215	-7.38233	down	0	0	yes	chr4	30920153	30950215	+	2	circRNA	ENST00000509759	PCDH7	chr4:30724596-30920152|chr4:30950215-31142472	protocadherin 7 [Source:HGNC Symbol;Acc:HGNC:8659]
circRNA1976	41.6672	12.9249	0	13.959	0	0	0	1600.88	1059.23	1041.22	1201.49	904.897	-6.40464	down	0	0	yes	chr6	151348711	151353752	+	1	circRNA	ENST00000402676	AKAP12	chr6:151305903-151348710|chr6:151353752-151355726	A-kinase anchoring protein 12 [Source:HGNC Symbol;Acc:HGNC:370]
circRNA847	41.6672	0	0	0	0	0	61.9373	994.719	662.018	736.214	1441.79	1336.46	-6.97262	down	0	0	yes	chr16	15714909	15715272	-	2	circRNA	ENST00000396324	MYH11	chr16:15704123-15714908|chr16:15715272-15717139	myosin heavy chain 11 [Source:HGNC Symbol;Acc:HGNC:7569]
circRNA13063	0	0	0	0	15.7026	0	0	419.647	344.249	473.28	789.55	403.723	-7.27407	down	0	0	yes	chr15	63056985	63062645	+	6	circRNA	ENST00000288398	TPM1	chr15:63044152-63056984|chr15:63062645-63064063	tropomyosin 1 [Source:HGNC Symbol;Acc:HGNC:12010]
circRNA5462	0	25.8498	0	0	0	0	0	777.124	278.048	210.347	240.298	222.744	-6.06327	down	0	0	yes	chr22	16637040	16638740	+	2	circRNA	ENST00000400593	TPTEP1	chr22:16622897-16637039|chr22:16638740-16647167	transmembrane phosphatase with tensin homology pseudogene 1 [Source:HGNC Symbol;Acc:HGNC:43648]
circRNA625	83.3344	0	12.9303	0	47.1079	26.6697	402.592	792.666	622.297	504.832	995.519	696.074	-4.56107	down	0	0	yes	chr10	103622470	103661114	-	3	circRNA	ENST00000369774	SH3PXD2A	chr10:103617314-103622469|chr10:103661114-103668607	SH3 and PX domains 2A [Source:HGNC Symbol;Acc:HGNC:23664]
circRNA679	41.6672	0	0	0	0	40.0045	30.9686	714.954	688.499	368.107	961.191	584.703	-5.3575	down	0	0	yes	chr17	12705128	12723008	+	4	circRNA	ENST00000425538	MYOCD	chr17:12666243-12705127|chr17:12723008-12736160	myocardin [Source:HGNC Symbol;Acc:HGNC:16067]
circRNA609	41.6672	0	0	0	47.1079	13.3348	123.875	1134.6	529.614	704.662	1115.67	682.153	-5.39297	down	0	0	yes	chr10	95381685	95410777	-	7	circRNA	ENST00000371227	SORBS1	chr10:95376056-95381684|chr10:95410777-95414493	sorbin and SH3 domain containing 1 [Source:HGNC Symbol;Acc:HGNC:14565]
circRNA2723	27.7781	219.723	219.815	55.8361	78.5132	106.679	0	0	13.2404	0	0	0	5.74144	up	0	0	yes	chr2	84870225	84870785	-	1	circRNA	ENST00000335459	TRABD2A	chr2:84839323-84870224|chr2:84870785-84880931	TraB domain containing 2A [Source:HGNC Symbol;Acc:HGNC:27013]
circRNA2182	13.8891	0	0	0	0	0	0	497.359	225.086	283.968	549.252	278.43	-7.04498	down	0	0	yes	chr5	179888103	179888312	-	1	circRNA	ENST00000355235	TBC1D9B	chr5:179879789-179888102|chr5:179888312-179891378	TBC1 domain family member 9B [Source:HGNC Symbol;Acc:HGNC:29097]
circRNA13160	0	0	0	0	31.4053	26.6697	30.9686	1072.43	582.576	431.211	703.729	779.603	-5.95415	down	0	0	yes	chr19	11546675	11546969	+	2	circRNA	ENST00000252456	CNN1	chr19:11541197-11546674|chr19:11546969-11547796	calponin 1 [Source:HGNC Symbol;Acc:HGNC:2155]
circRNA12239	0	0	0	139.59	157.026	0	278.718	714.954	370.73	315.52	1029.85	445.488	-3.41109	down	0	0	yes	chr1	1223244	1223968	-	2	circRNA	ENST00000360001	SDF4	chr1:1218927-1223243|chr1:1223968-1228467	stromal cell derived factor 4 [Source:HGNC Symbol;Acc:HGNC:24188]
circRNA20142	0	0	0	0	0	0	0	575.072	463.413	420.693	909.699	348.037	-inf	down	0	0	yes	chr16	15714909	15715081	-	1	circRNA	ENST00000396324	MYH11	chr16:15704123-15714908|chr16:15715081-15715163	myosin heavy chain 11 [Source:HGNC Symbol;Acc:HGNC:7569]
circRNA171	41.6672	0	0	0	0	26.6697	30.9686	932.549	410.451	515.35	566.416	696.074	-5.52737	down	0	0	yes	chr12	2115224	2120430	+	2	circRNA	ENST00000335762	CACNA1C	chr12:2053611-2115223|chr12:2120430-2448975	calcium voltage-gated channel subunit alpha1 C [Source:HGNC Symbol;Acc:HGNC:1390]
circRNA15312	0	0	0	0	0	40.0045	46.453	559.529	503.134	231.381	411.939	334.116	-5.70482	down	0	0	yes	chr5	39382618	39388852	-	2	circRNA	ENST00000545653	DAB2	chr5:39381616-39382617|chr5:39388852-39389096	DAB2, clathrin adaptor protein [Source:HGNC Symbol;Acc:HGNC:2662]
circRNA20164	0	0	0	0	0	0	0	528.444	158.884	157.76	223.134	180.979	-inf	down	0	0	yes	chr16	15750138	15753508	-	2	circRNA	ENST00000396324	MYH11	chr16:15748168-15750137|chr16:15753508-15756340	myosin heavy chain 11 [Source:HGNC Symbol;Acc:HGNC:7569]
circRNA12969	0	0	0	0	15.7026	0	0	528.444	185.365	241.899	617.909	278.43	-6.88197	down	0	0	yes	chr16	15726848	15727054	-	1	circRNA	ENST00000396324	MYH11	chr16:15724992-15726847|chr16:15727054-15732563	myosin heavy chain 11 [Source:HGNC Symbol;Acc:HGNC:7569]
circRNA13136	0	0	0	0	15.7026	40.0045	0	1709.67	794.422	399.659	446.267	2227.44	-6.6456	down	0	0	yes	chr14	79697630	79805190	+	2	circRNA	ENST00000635466	NRXN3	chr14:79692262-79697629|chr14:79805190-79861341	neurexin 3 [Source:HGNC Symbol;Acc:HGNC:8010]
circRNA16816	0	0	0	0	0	0	15.4843	637.242	635.537	305.003	789.55	403.723	-inf	down	0	0	yes	chr16	15782385	15786732	-	3	circRNA	ENST00000396324	MYH11	chr16:15778843-15782384|chr16:15786732-15798659	myosin heavy chain 11 [Source:HGNC Symbol;Acc:HGNC:7569]
circRNA5401	0	77.5494	38.7908	13.959	125.621	40.0045	108.39	4740.46	1986.05	2019.33	2986.56	2213.52	-5.56964	down	0	0	yes	chr18	8718424	8720496	+	2	circRNA	ENST00000306329	MTCL1	chr18:8706713-8718423|chr18:8720496-8777832	microtubule crosslinking factor 1 [Source:HGNC Symbol;Acc:HGNC:29121]
circRNA1890	13.8891	25.8498	25.8605	0	31.4053	13.3348	108.39	668.327	503.134	694.144	686.565	222.744	-4.7077	down	0	0	yes	chr6	57193842	57210445	-	5	circRNA	ENST00000468148	RAB23	chr6:57190600-57193841|chr6:57210445-57221725	RAB23, member RAS oncogene family [Source:HGNC Symbol;Acc:HGNC:14263]
circRNA4141	0	116.324	0	0	0	0	30.9686	777.124	503.134	610.006	583.58	194.901	-4.53658	down	0	0	yes	chr11	57491224	57491862	-	3	circRNA	ENST00000278426	SLC43A1	chr11:57489392-57491223|chr11:57491862-57493992	solute carrier family 43 member 1 [Source:HGNC Symbol;Acc:HGNC:9225]
circRNA11014	0	0	0	27.9181	0	66.6741	61.9373	7491.47	5852.24	6079.02	10315.6	5429.38	-8.54085	down	0	0	yes	chr12	55700899	55701154	-	1	circRNA	ENST00000553804	ITGA7	chr12:55700393-55700898|chr12:55701154-55702871	integrin subunit alpha 7 [Source:HGNC Symbol;Acc:HGNC:6143]
circRNA19334	0	0	0	0	0	0	0	279.765	278.048	178.795	308.954	180.979	-inf	down	0	0	yes	chr12	109252046	109254334	+	3	circRNA	ENST00000338432	ACACB	chr12:109250104-109252045|chr12:109254334-109256139	acetyl-CoA carboxylase beta [Source:HGNC Symbol;Acc:HGNC:85]
circRNA15453	0	0	0	0	0	13.3348	0	481.817	383.97	315.52	446.267	348.037	-7.21096	down	0	0	yes	chr4	150415438	150491035	-	7	circRNA	ENST00000510413	LRBA	chr4:150350159-150415437|chr4:150491035-150588047	LPS responsive beige-like anchor protein [Source:HGNC Symbol;Acc:HGNC:1742]
circRNA20174	0	0	0	0	0	0	0	777.124	291.288	189.312	686.565	292.351	-inf	down	0	0	yes	chr16	15763796	15778843	-	4	circRNA	ENST00000396324	MYH11	chr16:15760658-15763795|chr16:15778843-15782384	myosin heavy chain 11 [Source:HGNC Symbol;Acc:HGNC:7569]
circRNA22666	0	0	0	0	0	0	0	528.444	291.288	199.829	497.76	0	-inf	down	0	0	yes	chr2	237739232	237760205	+	9	circRNA	ENST00000308482	LRRFIP1	chr2:237735333-237739231|chr2:237760205-237769942	LRR binding FLII interacting protein 1 [Source:HGNC Symbol;Acc:HGNC:6702]
circRNA353	652.786	788.419	556.002	600.238	706.619	1280.14	1641.34	7196.17	4991.62	3912.45	6539.53	4956.05	-2.67306	down	0	0	yes	chr11	33286413	33287511	+	1	circRNA	ENST00000525975	HIPK3	chr11:33256752-33286412|chr11:33287511-33328509	homeodomain interacting protein kinase 3 [Source:HGNC Symbol;Acc:HGNC:4915]
circRNA19804	0	0	0	0	0	0	0	155.425	198.605	157.76	394.775	222.744	-inf	down	1e-06	0.000217662	yes	chr10	95339133	95346452	-	4	circRNA	ENST00000371227	SORBS1	chr10:95337294-95339132|chr10:95346452-95351208	sorbin and SH3 domain containing 1 [Source:HGNC Symbol;Acc:HGNC:14565]
circRNA2025	69.4453	0	0	0	31.4053	0	820.669	233.137	211.846	147.243	274.626	167.058	-4.2008	down	1e-06	0.000217662	yes	chr5	38523419	38530666	-	4	circRNA	ENST00000263409	LIFR	chr5:38511964-38523418|chr5:38530666-38595260	LIF receptor alpha [Source:HGNC Symbol;Acc:HGNC:6597]
circRNA20935	0	0	0	0	0	0	0	217.595	185.365	168.277	205.97	278.43	-inf	down	1e-06	0.000217662	yes	chr22	31097269	31099896	+	4	circRNA	ENST00000358743	SMTN	chr22:31097060-31097268|chr22:31099896-31100884	smoothelin [Source:HGNC Symbol;Acc:HGNC:11126]
circRNA21778	0	0	0	0	0	0	0	310.85	225.086	157.76	326.118	153.136	-inf	down	1e-06	0.000217662	yes	chr4	38051899	38103157	+	6	circRNA	ENST00000508802	TBC1D1	chr4:38049898-38051898|chr4:38103157-38115709	TBC1 domain family member 1 [Source:HGNC Symbol;Acc:HGNC:11578]
circRNA17149	0	0	0	0	0	0	15.4843	388.562	278.048	136.725	188.805	83.5289	-inf	down	1e-06	0.000217662	yes	chr19	46329207	46331273	+	2	circRNA	ENST00000377670	HIF3A	chr19:46325639-46329206|chr19:46331273-46334904	hypoxia inducible factor 3 alpha subunit [Source:HGNC Symbol;Acc:HGNC:15825]
circRNA2769	27.7781	51.6996	129.303	13.959	62.8106	40.0045	232.265	1227.86	463.413	420.693	944.027	459.409	-3.52502	down	1e-06	0.000217662	yes	chr2	121605701	121606180	-	1	circRNA	ENST00000263710	CLASP1	chr2:121530325-121605700|chr2:121606180-121649371	cytoplasmic linker associated protein 1 [Source:HGNC Symbol;Acc:HGNC:17088]
circRNA1772	13.8891	0	0	0	15.7026	0	61.9373	404.104	225.086	115.691	377.611	348.037	-5.69452	down	1e-06	0.000217662	yes	chr7	134947508	134950514	+	2	circRNA	ENST00000417172	CALD1	chr7:134941237-134947507|chr7:134950514-134958068	caldesmon 1 [Source:HGNC Symbol;Acc:HGNC:1441]
circRNA18212	0	0	0	0	0	0	77.4216	0	291.288	368.107	480.596	0	-inf	down	2e-06	0.000411139	yes	chr2	58198594	58232112	-	6	circRNA	ENST00000403295	FANCL	chr2:58165874-58198593|chr2:58232112-58241217	Fanconi anemia complementation group L [Source:HGNC Symbol;Acc:HGNC:20748]
circRNA20814	0	0	0	0	0	0	0	279.765	251.567	220.864	68.6565	194.901	-inf	down	2e-06	0.000411139	yes	chr18	9775278	9815222	+	4	circRNA	ENST00000578921	RAB31	chr18:9708444-9775277|chr18:9815222-9845581	RAB31, member RAS oncogene family [Source:HGNC Symbol;Acc:HGNC:9771]
circRNA2344	291.67	310.198	90.5119	181.467	188.432	226.692	913.575	1756.3	1377	851.904	2179.84	1225.09	-2.68754	down	2e-06	0.000411139	yes	chr4	143543509	143543972	+	2	circRNA	ENST00000283131	SMARCA5	chr4:143540495-143543508|chr4:143543972-143544736	SWI/SNF related, matrix associated, actin dependent regulator of chromatin, subfamily a, member 5 [Source:HGNC Symbol;Acc:HGNC:11101]
circRNA1902	41.6672	12.9249	38.7908	13.959	0	0	77.4216	512.902	370.73	473.28	600.744	208.822	-4.38572	down	2e-06	0.000411139	yes	chr6	75702645	75703072	+	1	circRNA	ENST00000370010	SENP6	chr6:75697517-75702644|chr6:75703072-75709526	SUMO1/sentrin specific peptidase 6 [Source:HGNC Symbol;Acc:HGNC:20944]
circRNA23121	0	0	0	0	0	0	0	388.562	105.923	84.1387	326.118	180.979	-inf	down	3e-06	0.000600041	yes	chr1	236032401	236038253	-	2	circRNA	ENST00000366595	NID1	chr1:236029750-236032400|chr1:236038253-236041909	nidogen 1 [Source:HGNC Symbol;Acc:HGNC:7821]
circRNA275	847.233	155.099	310.327	167.508	172.729	120.013	820.669	2036.06	1165.15	1062.25	2917.9	1447.83	-2.41418	down	3e-06	0.000600041	yes	chr12	95208843	95211267	-	1	circRNA	ENST00000343958	FGD6	chr12:95172744-95208842|chr12:95211267-95217224	FYVE, RhoGEF and PH domain containing 6 [Source:HGNC Symbol;Acc:HGNC:21740]
circRNA5312	0	12.9249	0	0	0	13.3348	92.9059	202.052	225.086	210.347	274.626	236.665	-5.5633	down	4e-06	0.000779	yes	chr19	13025021	13025552	+	1	circRNA	ENST00000397661	NFIX	chr19:12995864-13025020|chr19:13025552-13073046	nuclear factor I X [Source:HGNC Symbol;Acc:HGNC:7788]
circRNA4824	0	38.7747	25.8605	0	0	80.009	46.453	543.987	688.499	220.864	463.431	292.351	-3.96292	down	4e-06	0.000779	yes	chr16	47497399	47515601	+	5	circRNA	ENST00000566037	PHKB	chr16:47463993-47497398|chr16:47515601-47547432	phosphorylase kinase regulatory subunit beta [Source:HGNC Symbol;Acc:HGNC:8927]
circRNA5403	0	38.7747	38.7908	13.959	0	40.0045	61.9373	450.732	264.807	305.003	446.267	640.388	-4.04367	down	5e-06	0.000936772	yes	chr18	9583117	9595153	-	7	circRNA	ENST00000400556	PPP4R1	chr18:9577191-9583116|chr18:9595153-9614225	protein phosphatase 4 regulatory subunit 1 [Source:HGNC Symbol;Acc:HGNC:9320]
circRNA86	194.447	180.949	51.7211	139.59	251.242	320.036	851.638	1383.28	1218.11	1062.25	1888.05	765.682	-2.65529	down	5e-06	0.000936772	yes	chr13	32517857	32527532	-	4	circRNA	ENST00000357505	N4BP2L2	chr13:32444126-32517856|chr13:32527532-32538617	NEDD4 binding protein 2 like 2 [Source:HGNC Symbol;Acc:HGNC:26916]
circRNA21593	0	0	0	0	0	0	0	170.967	264.807	115.691	360.447	83.5289	-inf	down	5e-06	0.000936772	yes	chr5	59180595	59215968	-	4	circRNA	ENST00000340635	PDE4D	chr5:59038971-59180594|chr5:59215968-59893167	phosphodiesterase 4D [Source:HGNC Symbol;Acc:HGNC:8783]
circRNA21929	0	0	0	0	0	0	0	233.137	198.605	168.277	154.477	153.136	-inf	down	6e-06	0.001083	yes	chr4	150435589	150491035	-	6	circRNA	ENST00000510413	LRBA	chr4:150415590-150435588|chr4:150491035-150588047	LPS responsive beige-like anchor protein [Source:HGNC Symbol;Acc:HGNC:1742]
circRNA3037	194.447	168.024	219.815	153.549	157.026	373.375	495.498	2082.69	1178.39	1272.6	2265.66	1071.95	-2.72413	down	6e-06	0.001083	yes	chr1	41070595	41075451	-	2	circRNA	ENST00000397174	SCMH1	chr1:41048890-41070594|chr1:41075451-41113282	sex comb on midleg homolog 1 (Drosophila) [Source:HGNC Symbol;Acc:HGNC:19003]
circRNA14161	0	0	0	0	15.7026	13.3348	15.4843	466.274	251.567	178.795	102.985	361.959	-5.56754	down	6e-06	0.001083	yes	chr8	30474779	30504436	+	4	circRNA	ENST00000397323	RBPMS	chr8:30385158-30474778|chr8:30504436-30544493	RNA binding protein with multiple splicing [Source:HGNC Symbol;Acc:HGNC:19097]
circRNA11968	0	0	0	13.959	15.7026	26.6697	30.9686	373.019	304.528	262.933	463.431	167.058	-4.82974	down	7e-06	0.00124828	yes	chr4	119596523	119607297	-	2	circRNA	ENST00000354960	PDE5A	chr4:119567144-119596522|chr4:119607297-119628519	phosphodiesterase 5A [Source:HGNC Symbol;Acc:HGNC:8784]
circRNA3001	27.7781	25.8498	64.6514	55.8361	62.8106	0	232.265	575.072	423.692	420.693	566.416	403.723	-3.46808	down	8e-06	0.00140962	yes	chr1	31915895	31919658	-	2	circRNA	ENST00000468531	PTP4A2	None|chr1:31919658-31942528	protein tyrosine phosphatase type IVA, member 2 [Source:HGNC Symbol;Acc:HGNC:9635]
circRNA3284	13.8891	0	0	13.959	0	0	154.843	248.68	105.923	147.243	343.283	208.822	-5.43985	down	9e-06	0.00154894	yes	chr1	231795242	231818517	+	3	circRNA	ENST00000366632	DISC1	chr1:231771070-231795241|chr1:231818517-231854738	disrupted in schizophrenia 1 [Source:HGNC Symbol;Acc:HGNC:2888]
circRNA16462	0	0	0	0	0	0	46.453	264.222	119.163	147.243	137.313	111.372	-inf	down	9e-06	0.00154894	yes	chr11	94821530	94831541	+	3	circRNA	ENST00000317829	AMOTL1	chr11:94800311-94821529|chr11:94831541-94850113	angiomotin like 1 [Source:HGNC Symbol;Acc:HGNC:17811]
circRNA4494	0	323.123	103.442	153.549	361.161	146.683	15.4843	15.5425	52.9614	94.656	0	0	2.60646	up	1e-05	0.00170126	yes	chr17	1050050	1100735	-	14	circRNA	ENST00000302538	ABR	chr17:1013164-1050049|chr17:1100735-1125182	active BCR-related [Source:HGNC Symbol;Acc:HGNC:81]
circRNA3259	263.892	12.9249	103.442	97.7132	31.4053	53.3393	61.9373	0	0	0	0	0	3.18353	up	1.1e-05	0.00185012	yes	chr1	207027494	207027679	-	1	circRNA	ENST00000359470	C1orf116	chr1:207025064-207027493|chr1:207027679-207032578	chromosome 1 open reading frame 116 [Source:HGNC Symbol;Acc:HGNC:28667]
circRNA14528	0	0	0	0	0	40.0045	0	388.562	132.404	273.451	377.611	222.744	-5.12372	down	1.2e-05	0.00195178	yes	chr10	17603560	17604047	-	3	circRNA	ENST00000361271	HACD1	chr10:17599411-17603559|chr10:17604047-17617082	3-hydroxyacyl-CoA dehydratase 1 [Source:HGNC Symbol;Acc:HGNC:9639]
circRNA2847	13.8891	478.222	193.954	209.385	157.026	133.348	61.9373	31.085	0	147.243	0	27.843	2.14501	up	1.2e-05	0.00195178	yes	chr2	199368605	199433514	-	4	circRNA	ENST00000417098	SATB2	chr2:199349173-199368604|chr2:199433514-199455868	SATB homeobox 2 [Source:HGNC Symbol;Acc:HGNC:21637]
circRNA7629	0	64.6245	51.7211	27.9181	0	40.0045	15.4843	777.124	304.528	452.246	686.565	361.959	-3.81747	down	1.2e-05	0.00195178	yes	chr9	76629192	76636557	-	2	circRNA	ENST00000376717	PRUNE2	chr9:76624490-76629191|chr9:76636557-76637417	prune homolog 2 [Source:HGNC Symbol;Acc:HGNC:25209]
circRNA2939	125.002	90.4743	64.6514	41.8771	31.4053	53.3393	294.202	606.157	675.258	515.35	789.55	668.231	-3.1251	down	1.3e-05	0.00204695	yes	chr1	8541214	8614686	-	4	circRNA	ENST00000337907	RERE	chr1:8508675-8541213|chr1:8614686-8624309	arginine-glutamic acid dipeptide repeats [Source:HGNC Symbol;Acc:HGNC:9965]
circRNA19680	0	0	0	0	0	0	0	202.052	185.365	147.243	154.477	139.215	-inf	down	1.3e-05	0.00204695	yes	chr10	29512735	29532172	-	8	circRNA	ENST00000375398	SVIL	chr10:29499263-29512734|chr10:29532172-29532528	supervillin [Source:HGNC Symbol;Acc:HGNC:11480]
circRNA17087	0	0	0	0	0	0	15.4843	279.765	132.404	115.691	257.462	69.6074	-inf	down	1.3e-05	0.00204695	yes	chr14	99914179	99914697	+	2	circRNA	ENST00000327921	EML1	chr14:99911576-99914178|chr14:99914697-99917781	echinoderm microtubule associated protein like 1 [Source:HGNC Symbol;Acc:HGNC:3330]
circRNA849	27.7781	0	0	0	0	0	0	279.765	264.807	210.347	394.775	222.744	-5.62665	down	1.4e-05	0.00213623	yes	chr16	15771569	15786732	-	6	circRNA	ENST00000396324	MYH11	chr16:15763891-15771568|chr16:15786732-15798659	myosin heavy chain 11 [Source:HGNC Symbol;Acc:HGNC:7569]
circRNA545	69.4453	0	12.9303	0	0	26.6697	92.9059	186.51	383.97	210.347	669.401	348.037	-4.11628	down	1.4e-05	0.00213623	yes	chr10	32543300	32584304	+	7	circRNA	ENST00000639629	CCDC7	chr10:32518505-32543299|chr10:32584304-32634253	coiled-coil domain containing 7 [Source:HGNC Symbol;Acc:HGNC:26533]
circRNA1335	97.2234	38.7747	64.6514	13.959	109.918	13.3348	340.655	730.497	476.653	410.176	600.744	459.409	-3.15915	down	1.4e-05	0.00213623	yes	chr18	9583117	9595102	-	7	circRNA	ENST00000400555	PPP4R1	chr18:9577191-9583116|chr18:9595102-9614225	protein phosphatase 4 regulatory subunit 1 [Source:HGNC Symbol;Acc:HGNC:9320]
circRNA1682	41.6672	38.7747	64.6514	0	31.4053	160.018	77.4216	777.124	662.018	683.627	1270.15	236.665	-3.4615	down	1.7e-05	0.00256752	yes	chr7	80789306	80810701	-	7	circRNA	ENST00000265361	SEMA3C	chr7:80765243-80789305|chr7:80810701-80818298	semaphorin 3C [Source:HGNC Symbol;Acc:HGNC:10725]
circRNA1841	125.002	90.4743	90.5119	125.631	31.4053	213.357	387.108	1367.74	675.258	662.592	1647.76	556.86	-2.96935	down	1.8e-05	0.00269109	yes	chr6	18236452	18258405	-	7	circRNA	ENST00000397239	DEK	chr6:18226242-18236451|chr6:18258405-18263842	DEK proto-oncogene [Source:HGNC Symbol;Acc:HGNC:2768]
circRNA14539	0	0	0	0	0	26.6697	61.9373	202.052	185.365	147.243	188.805	250.587	-5.27967	down	2e-05	0.0029602	yes	chr10	31373018	31461237	+	4	circRNA	ENST00000488625	ZEB1	chr10:31319133-31373017|chr10:31461237-31495775	zinc finger E-box binding homeobox 1 [Source:HGNC Symbol;Acc:HGNC:11642]
circRNA13889	0	0	0	0	15.7026	0	0	264.222	264.807	147.243	257.462	111.372	-6.0565	down	2.2e-05	0.00322398	yes	chr1	8495063	8557523	-	6	circRNA	ENST00000337907	RERE	chr1:8466023-8495062|chr1:8557523-8614560	arginine-glutamic acid dipeptide repeats [Source:HGNC Symbol;Acc:HGNC:9965]
circRNA1560	27.7781	219.723	258.605	181.467	125.621	146.683	0	0	39.7211	52.5867	154.477	27.843	1.80537	up	2.3e-05	0.00333748	yes	chr7	677229	711527	-	3	circRNA	ENST00000544935	PRKAR1B	chr7:607452-677228|chr7:711527-712847	protein kinase cAMP-dependent type I regulatory subunit beta [Source:HGNC Symbol;Acc:HGNC:9390]
circRNA2570	13.8891	25.8498	0	0	31.4053	53.3393	123.875	590.614	145.644	294.485	377.611	306.273	-3.8845	down	2.5e-05	0.00359248	yes	chr3	183643480	183651276	+	2	circRNA	ENST00000242810	KLHL24	chr3:183635793-183643479|chr3:183651276-183663457	kelch like family member 24 [Source:HGNC Symbol;Acc:HGNC:25947]
circRNA448	41.6672	0	0	0	15.7026	13.3348	480.014	124.34	251.567	42.0693	1167.16	0	-4.8683	down	2.6e-05	0.00370025	yes	chr11	92352096	92355404	+	1	circRNA	ENST00000409404	FAT3	None|chr11:92355404-92524633	FAT atypical cadherin 3 [Source:HGNC Symbol;Acc:HGNC:23112]
circRNA20173	0	0	0	0	0	0	0	139.882	172.125	73.6214	291.79	139.215	-inf	down	2.7e-05	0.00377007	yes	chr16	15763796	15771712	-	2	circRNA	ENST00000396324	MYH11	chr16:15760658-15763795|chr16:15771712-15776077	myosin heavy chain 11 [Source:HGNC Symbol;Acc:HGNC:7569]
circRNA1977	13.8891	0	0	0	0	13.3348	61.9373	388.562	132.404	199.829	120.149	222.744	-5.36971	down	2.7e-05	0.00377007	yes	chr6	152329730	152331890	-	2	circRNA	ENST00000341594	SYNE1	chr6:152326633-152329729|chr6:152331890-152334007	spectrin repeat containing nuclear envelope protein 1 [Source:HGNC Symbol;Acc:HGNC:17089]
circRNA850	13.8891	0	0	0	0	0	0	341.935	238.326	157.76	291.79	97.4504	-6.34273	down	2.8e-05	0.00387316	yes	chr16	15776078	15786732	-	5	circRNA	ENST00000396324	MYH11	chr16:15771712-15776077|chr16:15786732-15798659	myosin heavy chain 11 [Source:HGNC Symbol;Acc:HGNC:7569]
circRNA2097	263.892	361.897	181.024	69.7952	172.729	173.353	433.561	1227.86	1363.76	1356.74	1510.44	1225.09	-2.5413	down	2.9e-05	0.00393788	yes	chr5	95755396	95763620	+	2	circRNA	ENST00000379982	RHOBTB3	chr5:95752350-95755395|chr5:95763620-95768045	Rho related BTB domain containing 3 [Source:HGNC Symbol;Acc:HGNC:18757]
circRNA22464	0	0	0	0	0	0	0	217.595	105.923	210.347	120.149	111.372	-inf	down	2.9e-05	0.00393788	yes	chr2	73913485	73914871	+	2	circRNA	ENST00000438902	ACTG2	chr2:73909139-73913484|chr2:73914871-73916583	actin, gamma 2, smooth muscle, enteric [Source:HGNC Symbol;Acc:HGNC:145]
circRNA3543	55.5563	0	25.8605	13.959	0	13.3348	170.328	450.732	185.365	168.277	463.431	320.194	-4.01564	down	3.2e-05	0.00430575	yes	chr8	89722015	89725641	-	3	circRNA	ENST00000504145	AF117829.1	chr8:89717728-89722014|chr8:89725641-89757044	NA
circRNA22787	0	0	0	0	0	0	0	217.595	185.365	147.243	34.3283	167.058	-inf	down	3.4e-05	0.00453364	yes	chr1	31583461	31585485	+	5	circRNA	ENST00000457433	TINAGL1	chr1:31579267-31583460|chr1:31585485-31585752	tubulointerstitial nephritis antigen like 1 [Source:HGNC Symbol;Acc:HGNC:19168]
circRNA2936	41.6672	38.7747	51.7211	27.9181	47.1079	26.6697	123.875	575.072	489.893	378.624	858.206	264.508	-3.52399	down	3.5e-05	0.00462531	yes	chr1	8495063	8614686	-	7	circRNA	ENST00000337907	RERE	chr1:8466023-8495062|chr1:8614686-8624309	arginine-glutamic acid dipeptide repeats [Source:HGNC Symbol;Acc:HGNC:9965]
circRNA13137	0	0	0	0	15.7026	0	15.4843	310.85	132.404	94.656	85.8206	403.723	-6.0535	down	3.9e-05	0.00510831	yes	chr14	79697630	79805199	+	2	circRNA	ENST00000634499	NRXN3	chr14:79692262-79697629|chr14:79805199-79861038	neurexin 3 [Source:HGNC Symbol;Acc:HGNC:8010]
circRNA3304	13.8891	0	0	0	0	40.0045	170.328	248.68	119.163	136.725	411.939	167.058	-4.54016	down	4.1e-05	0.00527688	yes	chr1	243545510	243573048	-	4	circRNA	ENST00000336199	AKT3	chr1:243512426-243545509|chr1:243573048-243613670	AKT serine/threonine kinase 3 [Source:HGNC Symbol;Acc:HGNC:393]
circRNA20145	0	0	0	0	0	0	0	217.595	132.404	157.76	171.641	69.6074	-inf	down	4.1e-05	0.00527688	yes	chr16	15717140	15718438	-	2	circRNA	ENST00000396324	MYH11	chr16:15715272-15717139|chr16:15718438-15719219	myosin heavy chain 11 [Source:HGNC Symbol;Acc:HGNC:7569]
circRNA2716	69.4453	219.723	90.5119	139.59	235.54	93.3438	665.826	1056.89	675.258	673.11	1390.29	696.074	-2.60426	down	4.5e-05	0.00574177	yes	chr2	72718103	72733118	-	4	circRNA	ENST00000272427	EXOC6B	chr2:72575668-72718102|chr2:72733118-72741303	exocyst complex component 6B [Source:HGNC Symbol;Acc:HGNC:17085]
circRNA19761	0	0	0	0	0	0	0	139.882	92.6825	126.208	205.97	167.058	-inf	down	4.7e-05	0.0059457	yes	chr10	76944773	76970067	-	4	circRNA	ENST00000604624	KCNMA1	chr10:76915049-76944772|chr10:76970067-77011966	potassium calcium-activated channel subfamily M alpha 1 [Source:HGNC Symbol;Acc:HGNC:6284]
circRNA13859	0	0	0	0	15.7026	0	108.39	170.967	132.404	199.829	291.79	13.9215	-5.86832	down	4.8e-05	0.00602075	yes	chr2	205172211	205193320	+	4	circRNA	ENST00000406610	PARD3B	chr2:205158907-205172210|chr2:205193320-205245777	par-3 family cell polarity regulator beta [Source:HGNC Symbol;Acc:HGNC:14446]
circRNA10186	0	0	12.9303	0	0	0	92.9059	217.595	92.6825	52.5867	274.626	194.901	-6.16109	down	5e-05	0.00616708	yes	chr2	61031419	61032113	+	1	circRNA	ENST00000295030	PEX13	chr2:61017851-61031418|chr2:61032113-61045725	peroxisomal biogenesis factor 13 [Source:HGNC Symbol;Acc:HGNC:8855]
circRNA82	69.4453	116.324	38.7908	111.672	47.1079	53.3393	185.812	808.209	913.585	283.968	841.042	765.682	-3.12071	down	5e-05	0.00616708	yes	chr13	26400453	26401624	+	3	circRNA	ENST00000536792	CDK8	chr13:26397225-26400452|chr13:26401624-26403955	cyclin dependent kinase 8 [Source:HGNC Symbol;Acc:HGNC:1779]
circRNA18380	0	0	0	0	0	0	46.453	124.34	132.404	84.1387	240.298	69.6074	-inf	down	5.2e-05	0.00636076	yes	chr2	229774097	229788940	-	7	circRNA	ENST00000283943	TRIP12	chr2:229771632-229774096|chr2:229788940-229789610	thyroid hormone receptor interactor 12 [Source:HGNC Symbol;Acc:HGNC:12306]
circRNA12643	0	0	0	0	15.7026	0	30.9686	0	92.6825	736.214	240.298	69.6074	-6.21907	down	5.7e-05	0.00691522	yes	chr12	97492461	97561047	+	8	circRNA	ENST00000640149	RMST	chr12:97465727-97492460|chr12:97561047-97564149	rhabdomyosarcoma 2 associated transcript (non-protein coding) [Source:HGNC Symbol;Acc:HGNC:29893]
circRNA18846	0	0	0	0	0	0	46.453	233.137	66.2018	42.0693	274.626	83.5289	-inf	down	5.9e-05	0.00704241	yes	chr8	105419144	105444381	+	2	circRNA	ENST00000407775	ZFPM2	chr8:105318981-105419143|chr8:105444381-105561362	zinc finger protein, FOG family member 2 [Source:HGNC Symbol;Acc:HGNC:16700]
circRNA2116	180.558	64.6245	116.372	55.8361	109.918	173.353	696.795	668.327	873.864	452.246	1355.97	542.938	-2.71175	down	5.9e-05	0.00704241	yes	chr5	124701014	124701269	-	1	circRNA	ENST00000504926	ZNF608	chr5:124649697-124701013|chr5:124701269-124744412	zinc finger protein 608 [Source:HGNC Symbol;Acc:HGNC:29238]
circRNA21911	0	0	0	0	0	0	0	139.882	145.644	94.656	205.97	125.293	-inf	down	6e-05	0.0070481	yes	chr4	147822727	147822957	+	2	circRNA	ENST00000510379	ARHGAP10	chr4:147732455-147822726|chr4:147822957-147847150	Rho GTPase activating protein 10 [Source:HGNC Symbol;Acc:HGNC:26099]
circRNA903	69.4453	0	0	55.8361	0	26.6697	154.843	202.052	635.537	462.763	394.775	97.4504	-3.67989	down	6e-05	0.0070481	yes	chr16	53873786	53888951	+	3	circRNA	ENST00000636491	FTO	chr16:53844298-53873785|chr16:53888951-53933984	FTO, alpha-ketoglutarate dependent dioxygenase [Source:HGNC Symbol;Acc:HGNC:24678]
circRNA12827	0	0	0	0	31.4053	80.009	0	404.104	344.249	199.829	514.924	208.822	-3.90751	down	6.1e-05	0.0070536	yes	chr10	69483691	69485215	+	2	circRNA	ENST00000373290	TSPAN15	chr10:69451690-69483690|chr10:69485215-69495593	tetraspanin 15 [Source:HGNC Symbol;Acc:HGNC:23298]
circRNA18225	0	0	0	0	0	0	15.4843	217.595	0	189.312	274.626	97.4504	-inf	down	6.1e-05	0.0070536	yes	chr2	63484604	63571626	-	6	circRNA	ENST00000417238	WDPCP	chr2:63439871-63484603|chr2:63571626-63588196	WD repeat containing planar cell polarity effector [Source:HGNC Symbol;Acc:HGNC:28027]
circRNA22614	0	0	0	0	0	0	0	217.595	0	63.104	446.267	180.979	-inf	down	6.3e-05	0.0072284	yes	chr2	214752447	214797117	-	6	circRNA	ENST00000260947	BARD1	chr2:214745854-214752446|chr2:214797117-214809411	BRCA1 associated RING domain 1 [Source:HGNC Symbol;Acc:HGNC:952]
circRNA3402	250.003	142.174	0	41.8771	298.35	306.701	1006.48	512.902	913.585	704.662	1390.29	779.603	-2.3527	down	6.5e-05	0.0074005	yes	chr9	110972073	110973558	-	2	circRNA	ENST00000374431	LPAR1	chr9:110942168-110972072|chr9:110973558-111037840	lysophosphatidic acid receptor 1 [Source:HGNC Symbol;Acc:HGNC:3166]
circRNA16537	0	0	0	0	0	0	15.4843	108.797	145.644	189.312	223.134	27.843	-inf	down	6.6e-05	0.00745699	yes	chr10	30026103	30029866	-	1	circRNA	ENST00000375377	JCAD	chr10:30017917-30026102|chr10:30029866-30047531	junctional cadherin 5 associated [Source:HGNC Symbol;Acc:HGNC:29283]
circRNA19812	0	0	0	0	0	0	0	155.425	66.2018	84.1387	308.954	139.215	-inf	down	6.9e-05	0.00767871	yes	chr10	95351209	95410777	-	14	circRNA	ENST00000371227	SORBS1	chr10:95346452-95351208|chr10:95410777-95414493	sorbin and SH3 domain containing 1 [Source:HGNC Symbol;Acc:HGNC:14565]
circRNA3479	13.8891	0	0	0	0	13.3348	0	155.425	317.769	147.243	188.805	306.273	-5.35669	down	6.9e-05	0.00767871	yes	chr8	38424509	38426245	-	2	circRNA	ENST00000425967	FGFR1	chr8:38421941-38424508|chr8:38426245-38427920	fibroblast growth factor receptor 1 [Source:HGNC Symbol;Acc:HGNC:3688]
circRNA4531	0	90.4743	155.163	55.8361	15.7026	13.3348	0	0	0	0	0	0	inf	up	7.1e-05	0.00784232	yes	chr17	27765535	27766588	-	2	circRNA	ENST00000313735	NOS2	chr17:27764144-27765534|chr17:27766588-27767704	nitric oxide synthase 2 [Source:HGNC Symbol;Acc:HGNC:7873]
circRNA2786	41.6672	64.6245	181.024	41.8771	31.4053	40.0045	278.718	823.751	476.653	546.902	909.699	194.901	-3.01157	down	7.2e-05	0.00788666	yes	chr2	147896301	147899898	+	3	circRNA	ENST00000241416	ACVR2A	chr2:147845207-147896300|chr2:147899898-147915190	activin A receptor type 2A [Source:HGNC Symbol;Acc:HGNC:173]
circRNA11909	0	0	0	13.959	0	13.3348	77.4216	217.595	145.644	157.76	274.626	111.372	-5.17262	down	7.3e-05	0.00788666	yes	chr5	177209636	177212195	+	1	circRNA	ENST00000354179	NSD1	chr5:177204292-177209635|chr5:177212195-177235820	nuclear receptor binding SET domain protein 1 [Source:HGNC Symbol;Acc:HGNC:14234]
circRNA18129	0	0	0	0	0	0	15.4843	124.34	145.644	84.1387	102.985	180.979	-inf	down	7.3e-05	0.00788666	yes	chr3	197830770	197839397	+	4	circRNA	ENST00000438796	LRCH3	chr3:197829673-197830769|chr3:197839397-197847408	leucine rich repeats and calponin homology domain containing 3 [Source:HGNC Symbol;Acc:HGNC:28637]
circRNA1658	83.3344	0	0	0	0	0	92.9059	233.137	132.404	157.76	411.939	208.822	-3.89175	down	7.7e-05	0.00825853	yes	chr7	69899286	69899498	+	1	circRNA	ENST00000406775	AUTS2	chr7:69599962-69899285|chr7:69899498-70118131	AUTS2, activator of transcription and developmental regulator [Source:HGNC Symbol;Acc:HGNC:14262]
circRNA15152	0	0	0	0	0	13.3348	0	170.967	185.365	115.691	171.641	222.744	-6.02178	down	7.8e-05	0.0083056	yes	chr7	102158560	102178657	+	3	circRNA	ENST00000437600	CUX1	chr7:102115273-102158559|chr7:102178657-102189812	cut like homeobox 1 [Source:HGNC Symbol;Acc:HGNC:2557]
circRNA13266	0	0	0	0	47.1079	0	0	264.222	79.4422	220.864	394.775	180.979	-4.59728	down	8.4e-05	0.0088806	yes	chr22	45700282	45740538	+	6	circRNA	ENST00000381061	ATXN10	chr22:45693078-45700281|chr22:45740538-45806958	ataxin 10 [Source:HGNC Symbol;Acc:HGNC:10549]
circRNA20656	0	0	0	0	0	0	0	295.307	39.7211	126.208	120.149	139.215	-inf	down	8.5e-05	0.00892259	yes	chr19	2189732	2191240	+	2	circRNA	ENST00000398665	DOT1L	chr19:2185929-2189731|chr19:2191240-2193688	DOT1 like histone lysine methyltransferase [Source:HGNC Symbol;Acc:HGNC:24948]
circRNA2948	41.6672	0	12.9303	0	0	80.009	61.9373	419.647	198.605	336.555	566.416	250.587	-3.76798	down	8.8e-05	0.00917245	yes	chr1	12275825	12278038	+	1	circRNA	ENST00000613099	VPS13D	chr1:12273135-12275824|chr1:12278038-12279498	vacuolar protein sorting 13 homolog D [Source:HGNC Symbol;Acc:HGNC:23595]
circRNA19575	0	0	0	0	0	0	0	139.882	211.846	52.5867	154.477	125.293	-inf	down	9e-05	0.00931531	yes	chr11	94799390	94800311	+	1	circRNA	ENST00000317829	AMOTL1	chr11:94768560-94799389|chr11:94800311-94821529	angiomotin like 1 [Source:HGNC Symbol;Acc:HGNC:17811]
circRNA17353	0	0	0	0	0	0	15.4843	279.765	92.6825	115.691	120.149	55.686	-inf	down	9.2e-05	0.00945619	yes	chr7	14574212	14673027	-	8	circRNA	ENST00000399322	DGKB	chr7:14478225-14574211|chr7:14673027-14682552	diacylglycerol kinase beta [Source:HGNC Symbol;Acc:HGNC:2850]
circRNA20296	0	0	0	0	0	0	0	202.052	145.644	42.0693	205.97	111.372	-inf	down	9.3e-05	0.00949306	yes	chr16	88737728	88738105	-	2	circRNA	ENST00000301015	PIEZO1	chr16:88737646-88737727|chr16:88738105-88738226	piezo type mechanosensitive ion channel component 1 [Source:HGNC Symbol;Acc:HGNC:28993]
circRNA2068	416.672	555.771	258.605	781.706	455.377	666.741	1656.82	3046.33	1615.32	1588.12	3072.38	2241.36	-2.07628	down	0.000101	0.010239	yes	chr5	73074742	73077493	+	2	circRNA	ENST00000430046	FCHO2	chr5:73068779-73074741|chr5:73077493-73078179	FCH domain only 2 [Source:HGNC Symbol;Acc:HGNC:25180]
circRNA1275	13.8891	0	0	0	0	0	46.453	295.307	66.2018	105.173	377.611	69.6074	-6.11154	down	0.000106	0.0106728	yes	chr19	14458031	14458375	+	2	circRNA	ENST00000585839	PKN1	chr19:14452023-14458030|chr19:14458375-14463666	protein kinase N1 [Source:HGNC Symbol;Acc:HGNC:9405]
circRNA6139	0	77.5494	0	0	94.2159	0	387.108	264.222	304.528	210.347	223.134	208.822	-3.2179	down	0.000107	0.0107007	yes	chr5	56864734	56865977	+	3	circRNA	ENST00000399503	MAP3K1	chr5:56859915-56864733|chr5:56865977-56871909	mitogen-activated protein kinase kinase kinase 1 [Source:HGNC Symbol;Acc:HGNC:6848]
circRNA9864	0	0	271.536	223.345	47.1079	200.022	263.233	885.921	860.623	431.211	583.58	779.603	-2.35807	down	0.000112	0.0111256	yes	chr3	3777725	3789074	-	4	circRNA	ENST00000470751	SUMF1	chr3:3702461-3777724|chr3:3789074-3800700	sulfatase modifying factor 1 [Source:HGNC Symbol;Acc:HGNC:20376]
circRNA4434	0	51.6996	0	0	0	0	46.453	202.052	145.644	126.208	274.626	250.587	-4.33799	down	0.000118	0.0116435	yes	chr10	100923975	100926019	+	2	circRNA	ENST00000238961	SLF2	chr10:100918441-100923974|chr10:100926019-100929316	SMC5-SMC6 complex localization factor 2 [Source:HGNC Symbol;Acc:HGNC:17814]
circRNA14090	0	0	0	0	15.7026	0	0	279.765	132.404	168.277	257.462	55.686	-5.83054	down	0.000124	0.0121545	yes	chr9	68378199	68392473	+	5	circRNA	ENST00000604870	PGM5	chr9:68371698-68378198|chr9:68392473-68405009	phosphoglucomutase 5 [Source:HGNC Symbol;Acc:HGNC:8908]
circRNA1319	41.6672	0	0	13.959	0	93.3438	0	994.719	383.97	168.277	120.149	584.703	-3.918	down	0.000125	0.0121719	yes	chr19	47416652	47417350	-	3	circRNA	ENST00000561204	MEIS3	chr19:47415101-47416651|chr19:47417350-47418169	Meis homeobox 3 [Source:HGNC Symbol;Acc:HGNC:29537]
circRNA19530	0	0	0	0	0	0	0	170.967	145.644	84.1387	85.8206	139.215	-inf	down	0.00013	0.012576	yes	chr11	68438446	68438682	+	1	circRNA	ENST00000294304	LRP5	chr11:68436999-68438445|chr11:68438682-68439776	LDL receptor related protein 5 [Source:HGNC Symbol;Acc:HGNC:6697]
circRNA19615	0	0	0	0	0	0	0	217.595	66.2018	115.691	85.8206	153.136	-inf	down	0.000136	0.013071	yes	chr11	120474560	120477526	+	5	circRNA	ENST00000356641	ARHGEF12	chr11:120473127-120474559|chr11:120477526-120478155	Rho guanine nucleotide exchange factor 12 [Source:HGNC Symbol;Acc:HGNC:14193]
circRNA638	13.8891	0	25.8605	0	0	0	30.9686	497.359	52.9614	262.933	480.596	69.6074	-5.13259	down	0.00015	0.0143235	yes	chr10	116089741	116096764	-	3	circRNA	ENST00000369236	GFRA1	chr10:116065626-116089740|chr10:116096764-116125220	GDNF family receptor alpha 1 [Source:HGNC Symbol;Acc:HGNC:4243]
circRNA7111	0	51.6996	64.6514	27.9181	15.7026	13.3348	0	450.732	383.97	378.624	703.729	180.979	-3.59764	down	0.000152	0.0144215	yes	chr2	205440370	205440672	+	1	circRNA	ENST00000406610	PARD3B	chr2:205401123-205440369|chr2:205440672-205499895	par-3 family cell polarity regulator beta [Source:HGNC Symbol;Acc:HGNC:14446]
circRNA13875	0	0	0	0	15.7026	0	0	139.882	185.365	157.76	205.97	125.293	-5.69643	down	0.000154	0.0145182	yes	chr2	239139684	239163923	-	4	circRNA	ENST00000345617	HDAC4	chr2:239134643-239139683|chr2:239163923-239176412	histone deacetylase 4 [Source:HGNC Symbol;Acc:HGNC:14063]
circRNA2480	13.8891	12.9249	0	41.8771	31.4053	26.6697	108.39	668.327	344.249	147.243	257.462	236.665	-3.79725	down	0.000155	0.01452	yes	chr3	111913319	111920419	+	3	circRNA	ENST00000393923	PHLDB2	chr3:111885412-111913318|chr3:111920419-111939474	pleckstrin homology like domain family B member 2 [Source:HGNC Symbol;Acc:HGNC:29573]
circRNA856	138.891	38.7747	12.9303	55.8361	94.2159	26.6697	30.9686	0	0	0	0	0	3.56815	up	0.00017	0.015825	yes	chr16	19463280	19464024	+	2	circRNA	ENST00000541464	TMC5	chr16:19460334-19463279|chr16:19464024-19466081	transmembrane channel like 5 [Source:HGNC Symbol;Acc:HGNC:22999]
circRNA867	27.7781	12.9249	12.9303	0	15.7026	0	30.9686	388.562	264.807	305.003	171.641	167.058	-4.25955	down	0.000174	0.0159961	yes	chr16	22225654	22225975	+	1	circRNA	ENST00000263026	EEF2K	chr16:22206679-22225653|chr16:22225975-22244629	eukaryotic elongation factor 2 kinase [Source:HGNC Symbol;Acc:HGNC:24615]
circRNA646	55.5563	77.5494	25.8605	0	31.4053	80.009	0	0	0	0	0	0	inf	up	0.000174	0.0159961	yes	chr10	126970702	127257429	+	28	circRNA	ENST00000280333	DOCK1	chr10:126905563-126970701|chr10:127257429-127339005	dedicator of cytokinesis 1 [Source:HGNC Symbol;Acc:HGNC:2987]
circRNA5078	0	12.9249	12.9303	0	0	13.3348	0	295.307	278.048	126.208	85.8206	264.508	-4.74361	down	0.000178	0.0162628	yes	chr15	90217439	90221765	+	6	circRNA	ENST00000332496	SEMA4B	chr15:90201735-90217438|chr15:90221765-90223558	semaphorin 4B [Source:HGNC Symbol;Acc:HGNC:10730]
circRNA17572	0	0	0	0	0	0	46.453	170.967	79.4422	63.104	85.8206	111.372	-inf	down	0.000188	0.0170572	yes	chr6	104833042	104843298	-	2	circRNA	ENST00000262903	HACE1	chr6:104811393-104833041|chr6:104843298-104849141	HECT domain and ankyrin repeat containing E3 ubiquitin protein ligase 1 [Source:HGNC Symbol;Acc:HGNC:21033]
circRNA643	13.8891	51.6996	51.7211	69.7952	172.729	173.353	263.233	917.006	714.979	483.798	411.939	570.781	-2.65649	down	0.000189	0.0170572	yes	chr10	124681607	124682379	-	1	circRNA	ENST00000494792	AC068896.1	chr10:124618793-124681606|chr10:124682379-124696157	NA
circRNA18619	0	0	0	0	0	0	15.4843	62.1699	105.923	147.243	120.149	111.372	-inf	down	0.000196	0.0175818	yes	chr1	225412454	225415332	-	2	circRNA	ENST00000272163	LBR	chr1:225411440-225412453|chr1:225415332-225417983	lamin B receptor [Source:HGNC Symbol;Acc:HGNC:6518]
circRNA19678	0	0	0	0	0	0	0	139.882	132.404	136.725	154.477	41.7645	-inf	down	0.0002	0.0178325	yes	chr10	29512735	29524715	-	4	circRNA	ENST00000375400	SVIL	chr10:29499263-29512734|chr10:29524715-29529704	supervillin [Source:HGNC Symbol;Acc:HGNC:11480]
circRNA22660	0	0	0	0	0	0	0	108.797	105.923	94.656	120.149	153.136	-inf	down	0.000202	0.0178845	yes	chr2	233450922	233452060	+	2	circRNA	ENST00000264057	DGKD	chr2:233450131-233450921|chr2:233452060-233454762	diacylglycerol kinase delta [Source:HGNC Symbol;Acc:HGNC:2851]
circRNA6501	0	12.9249	51.7211	0	31.4053	13.3348	92.9059	279.765	225.086	178.795	308.954	278.43	-3.64027	down	0.000203	0.0178845	yes	chr4	139125164	139139497	-	3	circRNA	ENST00000394235	ELF2	chr4:139073567-139125163|chr4:139139497-139176966	E74 like ETS transcription factor 2 [Source:HGNC Symbol;Acc:HGNC:3317]
circRNA7630	0	25.8498	0	0	0	0	15.4843	295.307	66.2018	94.656	120.149	306.273	-5.1186	down	0.000206	0.0180224	yes	chr9	76703337	76713721	-	3	circRNA	ENST00000376718	PRUNE2	chr9:76655502-76703336|chr9:76713721-76823631	prune homolog 2 [Source:HGNC Symbol;Acc:HGNC:25209]
circRNA15355	0	0	0	0	0	40.0045	325.171	233.137	66.2018	94.656	137.313	97.4504	-4.57565	down	0.000207	0.0180224	yes	chr5	131677703	131709272	-	6	circRNA	ENST00000307968	FNIP1	chr5:131672924-131677702|chr5:131709272-131716564	folliculin interacting protein 1 [Source:HGNC Symbol;Acc:HGNC:29418]
circRNA1794	27.7781	64.6245	90.5119	0	125.621	53.3393	15.4843	0	0	0	0	0	4.54661	up	0.000209	0.0180901	yes	chr7	148846470	148847305	-	2	circRNA	ENST00000492143	EZH2	chr7:148832750-148846469|chr7:148847305-148884163	enhancer of zeste 2 polycomb repressive complex 2 subunit [Source:HGNC Symbol;Acc:HGNC:3527]
circRNA16983	0	0	0	0	0	0	46.453	62.1699	119.163	210.347	34.3283	69.6074	-inf	down	0.000212	0.0182431	yes	chr15	83923904	83943082	+	3	circRNA	ENST00000286744	ADAMTSL3	chr15:83913378-83923903|chr15:83943082-83970483	ADAMTS like 3 [Source:HGNC Symbol;Acc:HGNC:14633]
circRNA6052	0	12.9249	12.9303	13.959	15.7026	0	294.202	170.967	238.326	126.208	205.97	55.686	-4.29706	down	0.000214	0.0183088	yes	chr6	130926605	130956499	-	3	circRNA	ENST00000528282	EPB41L2	chr6:130908863-130926604|chr6:130956499-131000619	erythrocyte membrane protein band 4.1 like 2 [Source:HGNC Symbol;Acc:HGNC:3379]
circRNA2925	27.7781	38.7747	51.7211	27.9181	282.648	146.683	402.592	637.242	291.288	283.968	1218.65	529.017	-2.5467	down	0.000218	0.0185438	yes	chr1	805799	810170	-	3	circRNA	ENST00000447500	AL669831.4	chr1:801163-805798|chr1:810170-817372	NA
circRNA23270	0	0	0	0	0	0	0	170.967	211.846	73.6214	137.313	27.843	-inf	down	0.000231	0.0195104	yes	chr9	111527268	111534353	+	4	circRNA	ENST00000358151	ZNF483	chr9:111525262-111527267|chr9:111534353-111576364	zinc finger protein 483 [Source:HGNC Symbol;Acc:HGNC:23384]
circRNA1645	13.8891	0	0	0	0	0	30.9686	108.797	158.884	115.691	291.79	97.4504	-5.85442	down	0.000232	0.0195104	yes	chr7	50703821	50705323	-	2	circRNA	ENST00000406641	GRB10	chr7:50674658-50703820|chr7:50705323-50755886	growth factor receptor bound protein 10 [Source:HGNC Symbol;Acc:HGNC:4564]
circRNA18023	0	0	0	0	0	0	123.875	108.797	198.605	21.0347	85.8206	27.843	-inf	down	0.000234	0.0195674	yes	chr3	73602354	73608684	-	2	circRNA	ENST00000263666	PDZRN3	chr3:73404395-73602353|chr3:73608684-73624102	PDZ domain containing ring finger 3 [Source:HGNC Symbol;Acc:HGNC:17704]
circRNA2187	13.8891	0	0	0	0	53.3393	15.4843	404.104	92.6825	189.312	223.134	292.351	-4.1782	down	0.000242	0.0201227	yes	chr4	898033	904779	-	2	circRNA	ENST00000314167	GAK	chr4:896549-898032|chr4:904779-911672	cyclin G associated kinase [Source:HGNC Symbol;Acc:HGNC:4113]
circRNA13697	0	0	0	0	15.7026	0	15.4843	248.68	105.923	178.795	85.8206	139.215	-5.6231	down	0.000252	0.0208372	yes	chr3	113249722	113250833	+	2	circRNA	ENST00000495514	BOC	chr3:113216274-113249721|chr3:113250833-113268298	BOC cell adhesion associated, oncogene regulated [Source:HGNC Symbol;Acc:HGNC:17173]
circRNA2985	41.6672	77.5494	90.5119	55.8361	31.4053	40.0045	263.233	668.327	450.172	283.968	635.073	334.116	-2.96703	down	0.000258	0.0212148	yes	chr1	26942660	26943065	+	2	circRNA	ENST00000321265	NUDC	chr1:26941818-26942659|chr1:26943065-26945389	nuclear distribution C, dynein complex regulator [Source:HGNC Symbol;Acc:HGNC:8045]
circRNA3134	41.6672	12.9249	0	0	15.7026	0	15.4843	233.137	238.326	73.6214	497.76	334.116	-4.30806	down	0.000263	0.0215064	yes	chr1	103565435	103575540	+	8	circRNA	ENST00000361355	AMY2B	chr1:103555109-103565434|chr1:103575540-103577489	amylase, alpha 2B (pancreatic) [Source:HGNC Symbol;Acc:HGNC:478]
circRNA1910	41.6672	64.6245	64.6514	27.9181	157.026	53.3393	232.265	543.987	503.134	326.037	772.386	445.488	-2.78641	down	0.000269	0.0218762	yes	chr6	87215903	87218731	+	3	circRNA	ENST00000369577	ZNF292	chr6:87155759-87215902|chr6:87218731-87233324	zinc finger protein 292 [Source:HGNC Symbol;Acc:HGNC:18410]
circRNA77	27.7781	25.8498	0	0	0	0	77.4216	202.052	145.644	168.277	240.298	180.979	-4.24189	down	0.000273	0.0220802	yes	chr13	20731841	20732121	-	1	circRNA	ENST00000382758	EEF1AKMT1	chr13:20729216-20731840|chr13:20732121-20737722	EEF1A lysine methyltransferase 1 [Source:HGNC Symbol;Acc:HGNC:27351]
circRNA9824	0	0	25.8605	0	47.1079	40.0045	154.843	233.137	238.326	115.691	411.939	180.979	-3.5627	down	0.000281	0.0226037	yes	chr4	120754553	120811449	-	7	circRNA	ENST00000264808	PRDM5	chr4:120710413-120754552|chr4:120811449-120816452	PR/SET domain 5 [Source:HGNC Symbol;Acc:HGNC:9349]
circRNA569	55.5563	0	0	0	0	0	123.875	217.595	66.2018	94.656	257.462	180.979	-4.08182	down	0.000293	0.0234416	yes	chr10	68393138	68394451	-	3	circRNA	ENST00000466493	RUFY2	chr10:68386128-68393137|chr10:68394451-68396779	RUN and FYVE domain containing 2 [Source:HGNC Symbol;Acc:HGNC:19761]
circRNA1368	55.5563	38.7747	116.372	97.7132	172.729	40.0045	15.4843	0	13.2404	31.552	51.4924	0	2.22118	up	0.000295	0.0234747	yes	chr18	49929512	49937397	-	3	circRNA	ENST00000285039	MYO5B	chr18:49912173-49929511|chr18:49937397-49953259	myosin VB [Source:HGNC Symbol;Acc:HGNC:7603]
circRNA1600	55.5563	12.9249	0	27.9181	0	0	232.265	233.137	211.846	73.6214	257.462	236.665	-3.69098	down	0.000306	0.0242198	yes	chr7	22960256	22991139	-	9	circRNA	ENST00000432176	FAM126A	chr7:22946163-22960255|chr7:22991139-23013924	family with sequence similarity 126 member A [Source:HGNC Symbol;Acc:HGNC:24587]
circRNA19331	0	0	0	0	0	0	0	202.052	39.7211	115.691	223.134	41.7645	-inf	down	0.000316	0.0248783	yes	chr12	109222507	109223904	+	3	circRNA	ENST00000338432	ACACB	chr12:109216920-109222506|chr12:109223904-109227370	acetyl-CoA carboxylase beta [Source:HGNC Symbol;Acc:HGNC:85]
circRNA9838	0	0	12.9303	13.959	15.7026	0	0	233.137	304.528	126.208	274.626	97.4504	-4.60423	down	0.000323	0.0252948	yes	chr4	139116649	139139497	-	5	circRNA	ENST00000511184	ELF2	chr4:139102353-139116648|chr4:139139497-139176966	E74 like ETS transcription factor 2 [Source:HGNC Symbol;Acc:HGNC:3317]
circRNA22672	0	0	0	0	0	0	0	264.222	52.9614	136.725	102.985	41.7645	-inf	down	0.000328	0.0255512	yes	chr2	239144583	239163923	-	3	circRNA	ENST00000345617	HDAC4	chr2:239139796-239144582|chr2:239163923-239176412	histone deacetylase 4 [Source:HGNC Symbol;Acc:HGNC:14063]
circRNA5448	0	38.7747	0	0	15.7026	26.6697	108.39	202.052	158.884	189.312	171.641	278.43	-3.7722	down	0.000335	0.0259599	yes	chr18	58918271	58920633	+	1	circRNA	ENST00000336078	ZNF532	chr18:58865579-58918270|chr18:58920633-58934432	zinc finger protein 532 [Source:HGNC Symbol;Acc:HGNC:30940]
circRNA3270	111.113	90.4743	685.304	69.7952	78.5132	80.009	61.9373	46.6274	26.4807	63.104	0	55.686	2.13535	up	0.000338	0.0260559	yes	chr1	224952670	224974153	+	7	circRNA	ENST00000430092	DNAH14	chr1:224929835-224952669|chr1:224974153-225002782	dynein axonemal heavy chain 14 [Source:HGNC Symbol;Acc:HGNC:2945]
circRNA20	27.7781	155.099	25.8605	83.7542	47.1079	66.6741	77.4216	730.497	635.537	420.693	480.596	584.703	-2.8501	down	0.000349	0.0267028	yes	chrX	24172715	24179770	+	3	circRNA	ENST00000379188	ZFX	chrX:24149794-24172714|chrX:24179770-24207325	zinc finger protein, X-linked [Source:HGNC Symbol;Acc:HGNC:12869]
circRNA21918	0	0	0	0	0	0	0	124.34	0	115.691	240.298	153.136	-inf	down	0.00035	0.0267028	yes	chr4	147906638	147913139	+	3	circRNA	ENST00000336498	ARHGAP10	chr4:147881932-147906637|chr4:147913139-147939824	Rho GTPase activating protein 10 [Source:HGNC Symbol;Acc:HGNC:26099]
circRNA17009	0	0	0	0	0	0	61.9373	93.2549	92.6825	52.5867	68.6565	111.372	-inf	down	0.000378	0.0286912	yes	chr14	22906195	22909595	-	3	circRNA	ENST00000359890	RBM23	chr14:22905659-22906194|chr14:22909595-22911327	RNA binding motif protein 23 [Source:HGNC Symbol;Acc:HGNC:20155]
circRNA23327	0	0	0	0	0	0	0	93.2549	105.923	52.5867	154.477	139.215	-inf	down	0.000387	0.0292244	yes	chr9	130399511	130400947	+	2	circRNA	ENST00000624552	HMCN2	chr9:130398707-130399510|chr9:130400947-130402788	hemicentin 2 [Source:HGNC Symbol;Acc:HGNC:21293]
circRNA2198	13.8891	38.7747	38.7908	0	15.7026	0	139.359	170.967	291.288	210.347	257.462	194.901	-3.56056	down	0.000392	0.0293777	yes	chr4	3086939	3107423	+	5	circRNA	ENST00000355072	HTT	chr4:3075088-3086938|chr4:3107423-3115303	huntingtin [Source:HGNC Symbol;Acc:HGNC:4851]
circRNA15745	0	0	0	0	0	40.0045	0	233.137	158.884	73.6214	223.134	222.744	-4.51004	down	0.000393	0.0293777	yes	chr2	202952559	202955758	+	3	circRNA	ENST00000402905	CARF	chr2:202942967-202952558|chr2:202955758-202961236	calcium responsive transcription factor [Source:HGNC Symbol;Acc:HGNC:14435]
circRNA4442	0	77.5494	0	0	0	13.3348	139.359	264.222	158.884	94.656	154.477	208.822	-3.48899	down	0.000395	0.0293789	yes	chr10	101939863	101957732	-	3	circRNA	ENST00000370033	C10orf76	chr10:101889490-101939862|chr10:101957732-101975211	chromosome 10 open reading frame 76 [Source:HGNC Symbol;Acc:HGNC:25788]
circRNA19763	0	0	0	0	0	0	0	139.882	119.163	115.691	120.149	41.7645	-inf	down	0.000403	0.029824	yes	chr10	76944773	77019099	-	6	circRNA	ENST00000604624	KCNMA1	chr10:76915049-76944772|chr10:77019099-77025445	potassium calcium-activated channel subfamily M alpha 1 [Source:HGNC Symbol;Acc:HGNC:6284]
circRNA8756	0	0	25.8605	13.959	15.7026	0	108.39	295.307	132.404	168.277	343.283	27.843	-4.2758	down	0.000411	0.0302615	yes	chr15	84538532	84555070	-	5	circRNA	ENST00000354771	UBE2Q2P1	chr15:84534238-84538531|chr15:84555070-84561959	ubiquitin conjugating enzyme E2 Q2 pseudogene 1 [Source:HGNC Symbol;Acc:HGNC:37439]
circRNA3553	13.8891	0	0	0	0	0	61.9373	93.2549	119.163	42.0693	274.626	139.215	-5.7164	down	0.000413	0.0302615	yes	chr8	96834973	96880005	+	2	circRNA	ENST00000220763	CPQ	chr8:96785330-96834972|chr8:96880005-96965934	carboxypeptidase Q [Source:HGNC Symbol;Acc:HGNC:16910]
circRNA1126	458.339	297.273	206.884	265.222	408.269	200.022	1037.45	1492.08	1257.83	1030.7	2008.2	1211.17	-2.13016	down	0.000419	0.0304726	yes	chr14	22909483	22911403	-	2	circRNA	ENST00000359890	RBM23	chr14:22908380-22909482|chr14:22911403-22918998	RNA binding motif protein 23 [Source:HGNC Symbol;Acc:HGNC:20155]
circRNA18890	0	0	0	0	0	0	0	93.2549	66.2018	63.104	171.641	153.136	-inf	down	0.00042	0.0304726	yes	chrX	10523092	10567603	-	2	circRNA	ENST00000317552	MID1	chrX:10495691-10523091|chrX:10567603-10620289	midline 1 [Source:HGNC Symbol;Acc:HGNC:7095]
circRNA15318	0	0	0	0	0	13.3348	46.453	248.68	92.6825	147.243	68.6565	83.5289	-5.68755	down	0.000438	0.0313896	yes	chr5	64788951	64804386	+	4	circRNA	ENST00000381070	CWC27	chr5:64786627-64788950|chr5:64804386-64885442	CWC27 spliceosome associated protein homolog [Source:HGNC Symbol;Acc:HGNC:10664]
circRNA22625	0	0	0	0	0	0	0	217.595	105.923	52.5867	85.8206	83.5289	-inf	down	0.000439	0.0313896	yes	chr2	217897798	217900512	-	2	circRNA	ENST00000171887	TNS1	chr2:217895056-217897797|chr2:217900512-217906334	tensin 1 [Source:HGNC Symbol;Acc:HGNC:11973]
circRNA23056	0	0	0	0	0	0	0	124.34	145.644	52.5867	171.641	55.686	-inf	down	0.000439	0.0313896	yes	chr1	203710877	203722689	+	7	circRNA	ENST00000357681	ATP2B4	chr1:203709542-203710876|chr1:203722689-203723880	ATPase plasma membrane Ca2+ transporting 4 [Source:HGNC Symbol;Acc:HGNC:817]
circRNA1990	41.6672	0	0	0	31.4053	0	108.39	357.477	158.884	126.208	188.805	125.293	-3.86546	down	0.000457	0.0325195	yes	chr6	163455279	163478896	+	2	circRNA	ENST00000361758	QKI	chr6:163415335-163455278|chr6:163478896-163534981	QKI, KH domain containing RNA binding [Source:HGNC Symbol;Acc:HGNC:21100]
circRNA2935	180.558	336.048	206.884	83.7542	251.242	146.683	851.638	1119.06	767.941	673.11	1664.92	751.76	-2.27387	down	0.000464	0.0328596	yes	chr1	7777160	7778169	+	2	circRNA	ENST00000054666	VAMP3	chr1:7773511-7777159|chr1:7778169-7779625	vesicle associated membrane protein 3 [Source:HGNC Symbol;Acc:HGNC:12644]
circRNA544	83.3344	25.8498	0	0	0	0	263.233	155.425	264.807	105.173	223.134	97.4504	-3.34471	down	0.000467	0.0329146	yes	chr10	32451592	32474023	+	8	circRNA	ENST00000476558	CCDC7	chr10:32446397-32451591|chr10:32474023-32517944	coiled-coil domain containing 7 [Source:HGNC Symbol;Acc:HGNC:26533]
circRNA19817	0	0	0	0	0	0	0	124.34	66.2018	105.173	102.985	111.372	-inf	down	0.000473	0.0331795	yes	chr10	95395001	95410777	-	5	circRNA	ENST00000371246	SORBS1	chr10:95387119-95395000|chr10:95410777-95414493	sorbin and SH3 domain containing 1 [Source:HGNC Symbol;Acc:HGNC:14565]
circRNA9457	0	0	90.5119	27.9181	0	53.3393	46.453	466.274	172.125	262.933	291.79	375.88	-3.2334	down	0.000482	0.0335443	yes	chr6	107503657	107506427	+	2	circRNA	ENST00000317357	SOBP	chr6:107490712-107503656|chr6:107506427-107533458	sine oculis binding protein homolog [Source:HGNC Symbol;Acc:HGNC:29256]
circRNA1459	83.3344	465.297	219.815	181.467	94.2159	213.357	433.561	1165.69	820.902	1156.91	1458.95	807.446	-2.21628	down	0.000484	0.0335443	yes	chr20	33619517	33623296	+	2	circRNA	ENST00000342704	CBFA2T2	chr20:33611335-33619516|chr20:33623296-33624763	CBFA2/RUNX1 translocation partner 2 [Source:HGNC Symbol;Acc:HGNC:1536]
circRNA3442	83.3344	0	12.9303	0	109.918	66.6741	201.296	341.935	238.326	273.451	394.775	445.488	-2.79619	down	0.000485	0.0335443	yes	chr9	131506114	131506453	+	2	circRNA	ENST00000423007	POMT1	chr9:131504340-131506113|chr9:131506453-131507367	protein O-mannosyltransferase 1 [Source:HGNC Symbol;Acc:HGNC:9202]
circRNA4441	0	12.9249	0	0	0	0	46.453	170.967	105.923	94.656	137.313	83.5289	-5.62723	down	0.00049	0.0335763	yes	chr10	101792839	101810314	-	9	circRNA	ENST00000361464	MGEA5	chr10:101791439-101792838|chr10:101810314-101813029	meningioma expressed antigen 5 (hyaluronidase) [Source:HGNC Symbol;Acc:HGNC:7056]
circRNA2533	180.558	64.6245	12.9303	111.672	31.4053	13.3348	170.328	528.444	489.893	410.176	411.939	570.781	-2.63871	down	0.00049	0.0335763	yes	chr3	152414941	152432920	+	2	circRNA	ENST00000282486	MBNL1	chr3:152300367-152414940|chr3:152432920-152445281	muscleblind like splicing regulator 1 [Source:HGNC Symbol;Acc:HGNC:6923]
circRNA1622	111.113	0	64.6514	13.959	15.7026	0	247.749	217.595	198.605	305.003	429.103	180.979	-2.94236	down	0.000493	0.0336262	yes	chr7	33357855	33388144	+	4	circRNA	ENST00000242067	BBS9	chr7:33352873-33357854|chr7:33388144-33505462	Bardet-Biedl syndrome 9 [Source:HGNC Symbol;Acc:HGNC:30000]
circRNA1899	13.8891	0	12.9303	13.959	47.1079	13.3348	77.4216	264.222	185.365	189.312	446.267	139.215	-3.68493	down	0.000496	0.0336757	yes	chr6	75634707	75678927	+	11	circRNA	ENST00000370010	SENP6	chr6:75633726-75634706|chr6:75678927-75695803	SUMO1/sentrin specific peptidase 6 [Source:HGNC Symbol;Acc:HGNC:20944]
circRNA944	944.456	310.198	336.187	683.993	612.403	586.732	2012.96	1942.81	1641.8	2040.36	2883.57	2199.6	-1.87257	down	0.000501	0.0338598	yes	chr16	85633914	85634132	+	1	circRNA	ENST00000253458	GSE1	chr16:85613398-85633913|chr16:85634132-85648551	Gse1 coiled-coil protein [Source:HGNC Symbol;Acc:HGNC:28979]
circRNA13257	0	0	0	0	31.4053	0	61.9373	202.052	172.125	73.6214	102.985	153.136	-4.608	down	0.000504	0.0339077	yes	chr22	33761371	33856802	-	2	circRNA	ENST00000354992	LARGE1	chr22:33650668-33761370|chr22:33856802-33919994	LARGE xylosyl- and glucuronyltransferase 1 [Source:HGNC Symbol;Acc:HGNC:6511]
circRNA2136	347.227	413.597	465.49	279.181	502.485	346.705	960.028	2580.05	1602.08	1419.84	2179.84	1336.46	-2.09765	down	0.000508	0.0340222	yes	chr5	137985257	137988315	-	3	circRNA	ENST00000033079	FAM13B	chr5:137962469-137985256|chr5:137988315-138006989	family with sequence similarity 13 member B [Source:HGNC Symbol;Acc:HGNC:1335]
circRNA18916	0	0	0	0	0	0	0	155.425	79.4422	52.5867	137.313	97.4504	-inf	down	0.000533	0.0355357	yes	chrX	32287529	32310276	-	2	circRNA	ENST00000619831	DMD	chrX:32217063-32287528|chrX:32310276-32342099	dystrophin [Source:HGNC Symbol;Acc:HGNC:2928]
circRNA5526	0	12.9249	0	13.959	0	0	15.4843	202.052	158.884	126.208	171.641	111.372	-4.86906	down	0.000537	0.0356419	yes	chr22	42890947	42891182	-	1	circRNA	ENST00000337959	PACSIN2	chr22:42888798-42890946|chr22:42891182-42893456	protein kinase C and casein kinase substrate in neurons 2 [Source:HGNC Symbol;Acc:HGNC:8571]
circRNA20696	0	0	0	0	0	0	0	124.34	0	42.0693	223.134	236.665	-inf	down	0.00054	0.035681	yes	chr19	11546675	11547907	+	3	circRNA	ENST00000252456	CNN1	chr19:11541197-11546674|chr19:11547907-11549322	calponin 1 [Source:HGNC Symbol;Acc:HGNC:2155]
circRNA295	41.6672	0	0	0	31.4053	66.6741	108.39	233.137	238.326	178.795	223.134	361.959	-3.26537	down	0.000548	0.0360487	yes	chr12	111552280	111555919	-	4	circRNA	ENST00000389153	ATXN2	chr12:111525316-111552279|chr12:111555919-111598783	ataxin 2 [Source:HGNC Symbol;Acc:HGNC:10555]
circRNA18237	0	0	0	0	0	0	61.9373	77.7124	66.2018	73.6214	102.985	69.6074	-inf	down	0.000555	0.0363476	yes	chr2	69988742	69996888	-	2	circRNA	ENST00000435880	PCBP1-AS1	chr2:69964427-69988741|chr2:69996888-70032132	PCBP1 antisense RNA 1 [Source:HGNC Symbol;Acc:HGNC:42948]
circRNA18341	0	0	0	0	0	0	30.9686	155.425	145.644	73.6214	51.4924	27.843	-inf	down	0.000561	0.0365481	yes	chr2	201129729	201136107	+	3	circRNA	ENST00000309955	CFLAR	chr2:201116481-201129728|chr2:201136107-201140356	CASP8 and FADD like apoptosis regulator [Source:HGNC Symbol;Acc:HGNC:1876]
circRNA2848	13.8891	90.4743	25.8605	55.8361	15.7026	120.013	0	31.085	0	0	0	0	3.37177	up	0.000563	0.0365481	yes	chr2	199368605	199381820	-	3	circRNA	ENST00000417098	SATB2	chr2:199349173-199368604|chr2:199381820-199433337	SATB homeobox 2 [Source:HGNC Symbol;Acc:HGNC:21637]
circRNA12079	0	0	0	13.959	15.7026	26.6697	0	435.189	66.2018	94.656	411.939	208.822	-4.43302	down	0.000568	0.0367117	yes	chr3	183650296	183651276	+	1	circRNA	ENST00000242810	KLHL24	chr3:183643542-183650295|chr3:183651276-183663457	kelch like family member 24 [Source:HGNC Symbol;Acc:HGNC:25947]
circRNA2867	13.8891	0	25.8605	0	47.1079	13.3348	61.9373	357.477	158.884	157.76	377.611	180.979	-3.69172	down	0.000575	0.0370025	yes	chr2	205158722	205193320	+	5	circRNA	ENST00000406610	PARD3B	chr2:205125737-205158721|chr2:205193320-205245777	par-3 family cell polarity regulator beta [Source:HGNC Symbol;Acc:HGNC:14446]
circRNA2978	152.78	51.6996	297.396	97.7132	188.432	66.6741	495.498	1103.52	675.258	704.662	1132.83	348.037	-2.3835	down	0.000591	0.0378675	yes	chr1	23030469	23050520	+	2	circRNA	ENST00000356634	KDM1A	chr1:23019947-23030468|chr1:23050520-23053760	lysine demethylase 1A [Source:HGNC Symbol;Acc:HGNC:29079]
circRNA259	138.891	710.87	556.002	725.87	596.7	480.054	650.342	310.85	198.605	241.899	343.283	459.409	0.54147	up	0.000619	0.0394482	no	chr12	69800209	69801721	+	2	circRNA	ENST00000247833	RAB3IP	chr12:69795344-69800208|chr12:69801721-69812777	RAB3A interacting protein [Source:HGNC Symbol;Acc:HGNC:16508]
circRNA2357	97.2234	38.7747	0	13.959	15.7026	0	232.265	186.51	185.365	368.107	343.283	97.4504	-3.09244	down	0.000621	0.0394482	yes	chr4	155696756	155722192	+	7	circRNA	ENST00000506455	GUCY1A3	chr4:155667419-155696755|chr4:155722192-155730029	guanylate cyclase 1 soluble subunit alpha [Source:HGNC Symbol;Acc:HGNC:4685]
circRNA6049	0	77.5494	25.8605	41.8771	94.2159	0	0	0	0	0	0	0	inf	up	0.00064	0.0404814	yes	chr6	128064758	128067792	-	2	circRNA	ENST00000368226	PTPRK	chr6:128009268-128064757|chr6:128067792-128078812	protein tyrosine phosphatase, receptor type K [Source:HGNC Symbol;Acc:HGNC:9674]
circRNA16675	0	0	0	0	0	0	61.9373	62.1699	26.4807	115.691	102.985	83.5289	-inf	down	0.000643	0.0404981	yes	chr17	21011151	21015899	-	3	circRNA	ENST00000261497	USP22	chr17:21007996-21011150|chr17:21015899-21017941	ubiquitin specific peptidase 22 [Source:HGNC Symbol;Acc:HGNC:12621]
circRNA1186	13.8891	12.9249	38.7908	27.9181	31.4053	13.3348	61.9373	279.765	211.846	305.003	257.462	375.88	-3.43166	down	0.000648	0.04064	yes	chr14	66965191	67058786	+	3	circRNA	ENST00000315266	GPHN	chr14:66922938-66965190|chr14:67058786-67088982	gephyrin [Source:HGNC Symbol;Acc:HGNC:15465]
circRNA2616	152.78	77.5494	0	13.959	0	26.6697	108.39	528.444	198.605	231.381	411.939	361.959	-2.76413	down	0.000661	0.0412314	yes	chr2	24135119	24147086	+	4	circRNA	ENST00000613899	FAM228B	chr2:24095229-24135118|chr2:24147086-24161505	family with sequence similarity 228 member B [Source:HGNC Symbol;Acc:HGNC:24736]
circRNA21142	0	0	0	0	0	0	0	248.68	39.7211	136.725	68.6565	41.7645	-inf	down	0.000663	0.0412314	yes	chr7	14607434	14673027	-	5	circRNA	ENST00000399322	DGKB	chr7:14583137-14607433|chr7:14673027-14682552	diacylglycerol kinase beta [Source:HGNC Symbol;Acc:HGNC:2850]
circRNA21921	0	0	0	0	0	0	0	155.425	92.6825	52.5867	51.4924	139.215	-inf	down	0.000672	0.0416162	yes	chr4	147939825	147966839	+	5	circRNA	ENST00000336498	ARHGAP10	chr4:147913139-147939824|chr4:147966839-148023262	Rho GTPase activating protein 10 [Source:HGNC Symbol;Acc:HGNC:26099]
circRNA6086	0	12.9249	12.9303	0	0	0	46.453	217.595	119.163	84.1387	137.313	125.293	-4.81928	down	0.000686	0.04214	yes	chr6	161048616	161049979	+	1	circRNA	ENST00000366919	MAP3K4	chr6:161034449-161048615|chr6:161049979-161070607	mitogen-activated protein kinase kinase kinase 4 [Source:HGNC Symbol;Acc:HGNC:6856]
circRNA558	27.7781	12.9249	0	0	0	0	61.9373	202.052	132.404	157.76	137.313	125.293	-4.3267	down	0.000689	0.04214	yes	chr10	48401612	48410168	+	4	circRNA	ENST00000395611	MAPK8	chr10:48306821-48401611|chr10:48410168-48420154	mitogen-activated protein kinase 8 [Source:HGNC Symbol;Acc:HGNC:6881]
circRNA4372	0	64.6245	0	0	0	26.6697	30.9686	295.307	172.125	168.277	343.283	125.293	-3.63635	down	0.000689	0.04214	yes	chr10	68644698	68647005	+	1	circRNA	ENST00000373644	TET1	chr10:68601034-68644697|chr10:68647005-68651845	tet methylcytosine dioxygenase 1 [Source:HGNC Symbol;Acc:HGNC:29484]
circRNA4239	0	38.7747	38.7908	69.7952	94.2159	213.357	0	0	26.4807	10.5173	0	27.843	2.81068	up	0.000699	0.0425757	yes	chr11	114580132	114583021	-	3	circRNA	ENST00000424261	NXPE4	chr11:114571473-114580131|chr11:114583021-114594663	neurexophilin and PC-esterase domain family member 4 [Source:HGNC Symbol;Acc:HGNC:23117]
circRNA9836	0	0	51.7211	153.549	0	80.009	418.077	575.072	370.73	0	274.626	501.174	-2.90695	down	0.000717	0.0434931	yes	chr4	128992167	129003876	-	4	circRNA	ENST00000281142	SCLT1	chr4:128970468-128992166|chr4:129003876-129039040	sodium channel and clathrin linker 1 [Source:HGNC Symbol;Acc:HGNC:26406]
circRNA492	152.78	103.399	155.163	167.508	141.324	226.692	356.139	1025.8	834.143	715.179	1115.67	904.897	-2.38673	down	0.00072	0.0434968	yes	chr11	130260856	130261929	-	1	circRNA	ENST00000445008	ZBTB44	chr11:130239896-130260855|chr11:130261929-130314374	zinc finger and BTB domain containing 44 [Source:HGNC Symbol;Acc:HGNC:25001]
circRNA14165	0	0	0	0	31.4053	0	61.9373	186.51	79.4422	199.829	188.805	27.843	-4.56693	down	0.000737	0.0441046	yes	chr8	38429682	38429948	-	1	circRNA	ENST00000425967	FGFR1	chr8:38428435-38429681|chr8:38429948-38457355	fibroblast growth factor receptor 1 [Source:HGNC Symbol;Acc:HGNC:3688]
circRNA17026	0	0	0	0	0	0	30.9686	46.6274	105.923	63.104	137.313	69.6074	-inf	down	0.000739	0.0441046	yes	chr14	37285318	37308519	+	3	circRNA	ENST00000396294	MIPOL1	chr14:37270525-37285317|chr14:37308519-37369516	mirror-image polydactyly 1 [Source:HGNC Symbol;Acc:HGNC:21460]
circRNA18550	0	0	0	0	0	0	30.9686	124.34	66.2018	73.6214	120.149	41.7645	-inf	down	0.000739	0.0441046	yes	chr1	151288528	151289271	+	2	circRNA	ENST00000336715	ZNF687	chr1:151288406-151288527|chr1:151289271-151289377	zinc finger protein 687 [Source:HGNC Symbol;Acc:HGNC:29277]
circRNA2550	166.669	219.723	271.536	55.8361	219.837	160.018	634.857	1227.86	794.422	683.627	1115.67	723.917	-2.24394	down	0.000748	0.0444624	yes	chr3	170136419	170149244	-	3	circRNA	ENST00000495893	PHC3	chr3:170129552-170136418|chr3:170149244-170171372	polyhomeotic homolog 3 [Source:HGNC Symbol;Acc:HGNC:15682]
circRNA828	111.113	12.9249	116.372	0	31.4053	40.0045	185.812	435.189	317.769	389.141	532.088	264.508	-2.76834	down	0.000767	0.045284	yes	chr16	4332215	4333519	+	2	circRNA	ENST00000262366	GLIS2	chr16:4329169-4332214|chr16:4333519-4334800	GLIS family zinc finger 2 [Source:HGNC Symbol;Acc:HGNC:29450]
circRNA55	41.6672	25.8498	38.7908	27.9181	0	66.6741	170.328	621.699	145.644	189.312	326.118	389.802	-3.19743	down	0.000769	0.045284	yes	chrX	118654602	118654961	+	2	circRNA	ENST00000276204	DOCK11	chrX:118652077-118654601|chrX:118654961-118662685	dedicator of cytokinesis 11 [Source:HGNC Symbol;Acc:HGNC:23483]
circRNA11424	0	0	0	13.959	0	0	15.4843	124.34	79.4422	157.76	188.805	69.6074	-5.50848	down	0.000771	0.045284	yes	chr14	31133238	31133675	-	2	circRNA	ENST00000611816	HECTD1	chr14:31129448-31133237|chr14:31133675-31134871	HECT domain E3 ubiquitin protein ligase 1 [Source:HGNC Symbol;Acc:HGNC:20157]
circRNA1314	83.3344	25.8498	51.7211	55.8361	0	0	154.843	388.562	331.009	199.829	360.447	292.351	-2.99426	down	0.000782	0.0457485	yes	chr19	45263113	45263367	+	2	circRNA	ENST00000587566	MARK4	chr19:45259189-45263112|chr19:45263367-45264683	microtubule affinity regulating kinase 4 [Source:HGNC Symbol;Acc:HGNC:13538]
circRNA3156	41.6672	0	193.954	13.959	31.4053	53.3393	154.843	590.614	489.893	273.451	583.58	153.136	-2.74773	down	0.000799	0.0465591	yes	chr1	149655699	149669310	+	6	circRNA	ENST00000610578	LINC00869	chr1:149647064-149655698|chr1:149669310-149675330	long intergenic non-protein coding RNA 869 [Source:HGNC Symbol;Acc:HGNC:29050]
circRNA16974	0	0	0	0	0	0	15.4843	62.1699	79.4422	73.6214	85.8206	125.293	-inf	down	0.00081	0.0470149	yes	chr15	75414205	75422823	-	2	circRNA	ENST00000394947	SIN3A	chr15:75413045-75414204|chr15:75422823-75430186	SIN3 transcription regulator family member A [Source:HGNC Symbol;Acc:HGNC:19353]
circRNA3187	152.78	90.4743	103.442	55.8361	78.5132	53.3393	665.826	388.562	648.778	462.763	635.073	292.351	-2.53322	down	0.000824	0.0476407	yes	chr1	155675010	155679512	-	3	circRNA	ENST00000368339	YY1AP1	chr1:155672731-155675009|chr1:155679512-155680415	YY1 associated protein 1 [Source:HGNC Symbol;Acc:HGNC:30935]
circRNA20411	0	0	0	0	0	0	0	93.2549	39.7211	84.1387	120.149	139.215	-inf	down	0.000836	0.0481464	yes	chr15	64748419	64751638	-	5	circRNA	ENST00000560606	RBPMS2	chr15:64741242-64748418|chr15:64751638-64761130	RNA binding protein with multiple splicing 2 [Source:HGNC Symbol;Acc:HGNC:19098]
circRNA1521	41.6672	155.099	116.372	55.8361	141.324	93.3438	216.781	683.869	675.258	641.558	841.042	403.723	-2.51994	down	0.000857	0.0491646	yes	chr21	29321221	29329693	+	3	circRNA	ENST00000286800	BACH1	chr21:29298953-29321220|chr21:29329693-29342398	BTB domain and CNC homolog 1 [Source:HGNC Symbol;Acc:HGNC:935]
circRNA20562	0	0	0	0	0	0	0	155.425	13.2404	84.1387	68.6565	180.979	-inf	down	0.000874	0.0496138	yes	chr14	54702062	54737287	+	2	circRNA	ENST00000554335	SAMD4A	chr14:54568112-54702061|chr14:54737287-54748814	sterile alpha motif domain containing 4A [Source:HGNC Symbol;Acc:HGNC:23023]
circRNA19770	0	0	0	0	0	0	0	93.2549	105.923	147.243	171.641	0	-inf	down	0.000877	0.0496138	yes	chr10	79289775	79292356	+	3	circRNA	ENST00000334512	ZMIZ1	chr10:79277325-79289774|chr10:79292356-79293380	zinc finger MIZ-type containing 1 [Source:HGNC Symbol;Acc:HGNC:16493]
circRNA871	41.6672	0	12.9303	0	15.7026	0	77.4216	279.765	92.6825	147.243	377.611	97.4504	-3.93087	down	0.000887	0.0496138	yes	chr16	24032136	24035547	+	2	circRNA	ENST00000321728	PRKCB	chr16:23988590-24032135|chr16:24035547-24092790	protein kinase C beta [Source:HGNC Symbol;Acc:HGNC:9395]
circRNA1124	194.447	542.846	387.908	97.7132	204.134	320.036	712.279	1554.25	1006.27	1051.73	1699.25	1141.56	-2.03609	down	0.000887	0.0496138	yes	chr14	21503173	21503881	-	2	circRNA	ENST00000298717	METTL3	chr14:21501903-21503172|chr14:21503881-21511123	methyltransferase like 3 [Source:HGNC Symbol;Acc:HGNC:17563]
circRNA23065	0	0	0	0	0	0	0	31.085	79.4422	63.104	274.626	83.5289	-inf	down	0.000889	0.0496138	yes	chr1	205001170	205002748	+	2	circRNA	ENST00000339876	NFASC	chr1:204997406-205001169|chr1:205002748-205009556	neurofascin [Source:HGNC Symbol;Acc:HGNC:29866]
circRNA22984	0	0	0	0	0	0	0	264.222	0	63.104	34.3283	208.822	-inf	down	0.000891	0.0496138	yes	chr1	156333547	156334918	-	3	circRNA	ENST00000295688	CCT3	chr1:156325089-156333546|chr1:156334918-156335826	chaperonin containing TCP1 subunit 3 [Source:HGNC Symbol;Acc:HGNC:1616]
circRNA3818	0	38.7747	0	27.9181	0	0	0	388.562	225.086	157.76	274.626	41.7645	-4.02774	down	0.000893	0.0496138	yes	chr13	110622216	110624279	+	2	circRNA	ENST00000470164	NAXD	chr13:110615647-110622215|chr13:110624279-110627438	NAD(P)HX dehydratase [Source:HGNC Symbol;Acc:HGNC:25576]
circRNA22805	0	0	0	0	0	0	0	62.1699	66.2018	84.1387	240.298	55.686	-inf	down	0.000894	0.0496138	yes	chr1	35441047	35444303	-	4	circRNA	ENST00000325722	KIAA0319L	chr1:35435081-35441046|chr1:35444303-35448172	KIAA0319 like [Source:HGNC Symbol;Acc:HGNC:30071]
circRNA17158	0	0	0	0	0	0	123.875	155.425	0	42.0693	154.477	27.843	-inf	down	0.000895	0.0496138	yes	chr19	57455653	57456182	-	2	circRNA	ENST00000596831	AC004076.1	chr19:57438092-57455652|chr19:57456182-57475659	NA
circRNA12127	0	0	0	13.959	47.1079	40.0045	92.9059	248.68	132.404	136.725	257.462	222.744	-3.4321	down	0.000899	0.0496496	yes	chr2	54050958	54057360	+	2	circRNA	ENST00000458030	ACYP2	chr2:53973810-54050957|chr2:54057360-54079931	acylphosphatase 2 [Source:HGNC Symbol;Acc:HGNC:180]
circRNA22692	0	0	0	0	0	0	0	108.797	132.404	73.6214	85.8206	55.686	-inf	down	0.000912	0.0501589	yes	chr1	8465925	8614686	-	8	circRNA	ENST00000337907	RERE	chr1:8422807-8465924|chr1:8614686-8624309	arginine-glutamic acid dipeptide repeats [Source:HGNC Symbol;Acc:HGNC:9965]
circRNA1329	41.6672	0	0	0	0	0	61.9373	124.34	132.404	105.173	102.985	222.744	-4.1691	down	0.000915	0.0501589	yes	chr18	8113486	8143779	+	3	circRNA	ENST00000580170	PTPRM	chr18:8088851-8113485|chr18:8143779-8244057	protein tyrosine phosphatase, receptor type M [Source:HGNC Symbol;Acc:HGNC:9675]
circRNA22629	0	0	0	0	0	0	0	62.1699	132.404	115.691	85.8206	55.686	-inf	down	0.00092	0.0502469	yes	chr2	218634105	218634630	+	2	circRNA	ENST00000450993	PLCD4	chr2:218633761-218634104|chr2:218634630-218635795	phospholipase C delta 4 [Source:HGNC Symbol;Acc:HGNC:9062]
circRNA3271	97.2234	51.6996	672.374	41.8771	62.8106	0	30.9686	0	0	21.0347	17.1641	55.686	2.89075	up	0.000927	0.0504431	yes	chr1	224952670	225007544	+	9	circRNA	ENST00000430092	DNAH14	chr1:224929835-224952669|chr1:225007544-225023614	dynein axonemal heavy chain 14 [Source:HGNC Symbol;Acc:HGNC:2945]
circRNA4926	0	25.8498	12.9303	0	0	26.6697	61.9373	217.595	211.846	52.5867	308.954	153.136	-3.94218	down	0.000963	0.0520736	yes	chr15	29761139	29773357	-	6	circRNA	ENST00000346128	TJP1	chr15:29742781-29761138|chr15:29773357-29800645	tight junction protein 1 [Source:HGNC Symbol;Acc:HGNC:11827]
circRNA21251	0	0	0	0	0	0	0	202.052	52.9614	31.552	154.477	69.6074	-inf	down	0.000964	0.0520736	yes	chr7	95225961	95284330	+	10	circRNA	ENST00000433360	PPP1R9A	chr7:95203730-95225960|chr7:95284330-95286205	protein phosphatase 1 regulatory subunit 9A [Source:HGNC Symbol;Acc:HGNC:14946]
circRNA20155	0	0	0	0	0	0	0	62.1699	66.2018	63.104	85.8206	180.979	-inf	down	0.001006	0.0541447	yes	chr16	15735366	15745237	-	7	circRNA	ENST00000396324	MYH11	chr16:15732708-15735365|chr16:15745237-15747569	myosin heavy chain 11 [Source:HGNC Symbol;Acc:HGNC:7569]
circRNA2938	13.8891	0	0	27.9181	15.7026	80.009	30.9686	341.935	251.567	252.416	480.596	125.293	-3.4306	down	0.001012	0.0542703	yes	chr1	8541214	8557523	-	3	circRNA	ENST00000337907	RERE	chr1:8508675-8541213|chr1:8557523-8614560	arginine-glutamic acid dipeptide repeats [Source:HGNC Symbol;Acc:HGNC:9965]
circRNA1557	166.669	12.9249	25.8605	0	78.5132	26.6697	201.296	373.019	278.048	157.76	463.431	403.723	-2.59534	down	0.001018	0.0543058	yes	chr21	45128402	45134832	+	2	circRNA	ENST00000462214	ADARB1	chr21:45073903-45128401|chr21:45134832-45137080	adenosine deaminase, RNA specific B1 [Source:HGNC Symbol;Acc:HGNC:226]
circRNA1320	13.8891	25.8498	12.9303	13.959	15.7026	66.6741	263.233	373.019	145.644	189.312	188.805	208.822	-3.19952	down	0.00102	0.0543058	yes	chr19	48633444	48633655	-	1	circRNA	ENST00000222122	DBP	chr19:48631052-48633443|chr19:48633655-48635579	D-box binding PAR bZIP transcription factor [Source:HGNC Symbol;Acc:HGNC:2697]
circRNA19971	0	0	0	0	0	0	0	295.307	0	0	274.626	97.4504	-inf	down	0.001034	0.054658	yes	chr17	32171043	32183272	+	7	circRNA	ENST00000333942	RHOT1	chr17:32142729-32171042|chr17:32183272-32192200	ras homolog family member T1 [Source:HGNC Symbol;Acc:HGNC:21168]
circRNA3550	69.4453	323.123	0	0	109.918	133.348	0	0	39.7211	31.552	0	0	3.15722	up	0.001034	0.054658	yes	chr8	94664697	94665196	+	3	circRNA	ENST00000423620	ESRP1	chr8:94662555-94664696|chr8:94665196-94667948	epithelial splicing regulatory protein 1 [Source:HGNC Symbol;Acc:HGNC:25966]
circRNA319	13.8891	25.8498	0	0	31.4053	26.6697	123.875	419.647	172.125	63.104	223.134	167.058	-3.57902	down	0.001062	0.0559383	yes	chr12	123498544	123499536	-	2	circRNA	ENST00000376874	RILPL1	chr12:123485805-123498543|chr12:123499536-123523494	Rab interacting lysosomal protein like 1 [Source:HGNC Symbol;Acc:HGNC:26814]
circRNA2579	41.6672	12.9249	0	0	15.7026	0	15.4843	450.732	383.97	21.0347	154.477	236.665	-4.16657	down	0.001079	0.0566322	yes	chr3	188406112	188524787	+	3	circRNA	ENST00000448637	LPP	chr3:188341719-188406111|chr3:188524787-188609160	LIM domain containing preferred translocation partner in lipoma [Source:HGNC Symbol;Acc:HGNC:6679]
circRNA18530	0	0	0	0	0	0	170.328	62.1699	39.7211	63.104	120.149	0	-inf	down	0.001094	0.0571194	yes	chr1	100424222	100442996	+	3	circRNA	ENST00000635056	CDC14A	chr1:100390824-100424221|chr1:100442996-100455404	cell division cycle 14A [Source:HGNC Symbol;Acc:HGNC:1718]
circRNA21544	0	0	0	0	0	0	0	139.882	52.9614	105.173	120.149	41.7645	-inf	down	0.001096	0.0571194	yes	chr6	160032551	160043288	+	5	circRNA	ENST00000356956	IGF2R	chr6:160029655-160032550|chr6:160043288-160044513	insulin like growth factor 2 receptor [Source:HGNC Symbol;Acc:HGNC:5467]
circRNA20949	0	0	0	0	0	0	0	170.967	66.2018	63.104	102.985	55.686	-inf	down	0.001133	0.0588405	yes	chr22	36316517	36318325	-	2	circRNA	ENST00000216181	MYH9	chr22:36314318-36316516|chr22:36318325-36319539	myosin heavy chain 9 [Source:HGNC Symbol;Acc:HGNC:7579]
circRNA7477	0	12.9249	0	0	47.1079	13.3348	170.328	186.51	79.4422	210.347	120.149	153.136	-3.64828	down	0.001139	0.0589452	yes	chr1	204112915	204114605	+	3	circRNA	ENST00000367203	SOX13	chr1:204073711-204112914|chr1:204114605-204116506	SRY-box 13 [Source:HGNC Symbol;Acc:HGNC:11192]
circRNA6887	0	206.799	0	0	31.4053	53.3393	0	0	0	0	0	0	inf	up	0.001157	0.0596681	yes	chr2	47373463	47374048	+	2	circRNA	ENST00000405271	EPCAM	chr2:47369235-47373462|chr2:47374048-47375233	epithelial cell adhesion molecule [Source:HGNC Symbol;Acc:HGNC:11529]
circRNA16094	0	0	0	0	0	0	92.9059	62.1699	185.365	105.173	0	0	-inf	down	0.001162	0.0597161	yes	chrX	2719661	2726373	+	5	circRNA	ENST00000381192	CD99	chrX:2717652-2719660|chrX:2726373-2738199	CD99 molecule (Xg blood group) [Source:HGNC Symbol;Acc:HGNC:7082]
circRNA1269	27.7781	0	0	13.959	0	0	92.9059	155.425	105.923	73.6214	137.313	208.822	-4.21295	down	0.001166	0.0597161	yes	chr19	11513056	11514221	-	2	circRNA	ENST00000270517	ECSIT	chr19:11508048-11513055|chr19:11514221-11519074	ECSIT signalling integrator [Source:HGNC Symbol;Acc:HGNC:29548]
circRNA3501	166.669	155.099	206.884	97.7132	282.648	266.697	464.53	1056.89	728.22	525.867	1819.4	1127.64	-2.28312	down	0.001182	0.0603268	yes	chr8	51860845	51861246	-	1	circRNA	ENST00000360540	PCMTD1	chr8:51845763-51860844|chr8:51861246-51870247	protein-L-isoaspartate (D-aspartate) O-methyltransferase domain containing 1 [Source:HGNC Symbol;Acc:HGNC:30483]
circRNA25057	0	0	0	0	0	0	0	0	119.163	94.656	102.985	153.136	-inf	down	0.001188	0.0604247	yes	chr21	46643535	46644488	+	2	circRNA	ENST00000355680	PRMT2	chr21:46636990-46643534|chr21:46644488-46648457	protein arginine methyltransferase 2 [Source:HGNC Symbol;Acc:HGNC:5186]
circRNA191	13.8891	0	0	0	15.7026	0	46.453	170.967	79.4422	178.795	137.313	97.4504	-4.58541	down	0.001198	0.0607247	yes	chr12	20616230	20635056	+	5	circRNA	ENST00000359062	PDE3A	chr12:20613700-20616229|chr12:20635056-20637099	phosphodiesterase 3A [Source:HGNC Symbol;Acc:HGNC:8778]
circRNA3737	0	25.8498	103.442	0	125.621	0	247.749	341.935	251.567	73.6214	463.431	208.822	-2.63834	down	0.001234	0.062336	yes	chr13	28256292	28261458	+	3	circRNA	ENST00000503791	PAN3	chr13:28220378-28256291|chr13:28261458-28266714	PAN3 poly(A) specific ribonuclease subunit [Source:HGNC Symbol;Acc:HGNC:29991]
circRNA10154	0	0	25.8605	0	0	13.3348	46.453	93.2549	119.163	189.312	137.313	153.136	-4.2361	down	0.001241	0.0624763	yes	chr2	36441258	36442735	+	2	circRNA	ENST00000280527	CRIM1	chr2:36396787-36441257|chr2:36442735-36464533	cysteine rich transmembrane BMP regulator 1 [Source:HGNC Symbol;Acc:HGNC:2359]
circRNA2350	13.8891	0	25.8605	0	0	40.0045	30.9686	264.222	251.567	115.691	68.6565	306.273	-3.70124	down	0.001248	0.0626158	yes	chr4	150102478	150102812	+	1	circRNA	ENST00000296550	DCLK2	chr4:150079448-150102477|chr4:150102812-150193137	doublecortin like kinase 2 [Source:HGNC Symbol;Acc:HGNC:19002]
circRNA2255	83.3344	0	0	41.8771	125.621	66.6741	92.9059	528.444	304.528	326.037	738.057	236.665	-2.81001	down	0.001308	0.0654044	yes	chr4	51863437	51891851	+	5	circRNA	ENST00000509376	DCUN1D4	chr4:51843267-51863436|chr4:51891851-51899269	defective in cullin neddylation 1 domain containing 4 [Source:HGNC Symbol;Acc:HGNC:28998]
circRNA21970	0	0	0	0	0	0	0	233.137	66.2018	42.0693	205.97	0	-inf	down	0.001335	0.0665297	yes	chr4	186663299	186709845	-	2	circRNA	ENST00000441802	FAT1	chr4:186639783-186663298|chr4:186709845-186723663	FAT atypical cadherin 1 [Source:HGNC Symbol;Acc:HGNC:3595]
circRNA6251	0	25.8498	77.5816	27.9181	0	26.6697	92.9059	388.562	225.086	147.243	257.462	250.587	-3.10739	down	0.001342	0.0666542	yes	chr5	136147832	136154163	+	2	circRNA	ENST00000545279	SMAD5	chr5:136132962-136147831|chr5:136154163-136160855	SMAD family member 5 [Source:HGNC Symbol;Acc:HGNC:6771]
circRNA19564	0	0	0	0	0	0	0	233.137	0	21.0347	120.149	167.058	-inf	down	0.001351	0.0668768	yes	chr11	86007542	86031611	-	7	circRNA	ENST00000532317	PICALM	chr11:86003451-86007541|chr11:86031611-86068650	phosphatidylinositol binding clathrin assembly protein [Source:HGNC Symbol;Acc:HGNC:15514]
circRNA1230	27.7781	0	0	0	0	53.3393	77.4216	186.51	238.326	115.691	171.641	153.136	-3.53875	down	0.001357	0.0669499	yes	chr14	93293858	93294937	-	1	circRNA	ENST00000334746	BTBD7	chr14:93263993-93293857|chr14:93294937-93295969	BTB domain containing 7 [Source:HGNC Symbol;Acc:HGNC:18269]
circRNA2069	27.7781	0	51.7211	0	0	26.6697	154.843	155.425	158.884	147.243	223.134	208.822	-3.30369	down	0.001414	0.0694133	yes	chr5	73554322	73561288	-	5	circRNA	ENST00000296785	ANKRA2	chr5:73553486-73554321|chr5:73561288-73562592	ankyrin repeat family A member 2 [Source:HGNC Symbol;Acc:HGNC:13208]
circRNA21922	0	0	0	0	0	0	0	77.7124	66.2018	21.0347	154.477	139.215	-inf	down	0.001421	0.0694133	yes	chr4	147946617	147966839	+	4	circRNA	ENST00000336498	ARHGAP10	chr4:147939899-147946616|chr4:147966839-148023262	Rho GTPase activating protein 10 [Source:HGNC Symbol;Acc:HGNC:26099]
circRNA10921	0	0	25.8605	0	0	0	0	233.137	145.644	94.656	223.134	41.7645	-4.83545	down	0.001421	0.0694133	yes	chr8	140830472	140890769	-	6	circRNA	ENST00000522684	PTK2	chr8:140819020-140830471|chr8:140890769-140925660	protein tyrosine kinase 2 [Source:HGNC Symbol;Acc:HGNC:9611]
circRNA2005	55.5563	38.7747	25.8605	27.9181	0	40.0045	61.9373	404.104	383.97	273.451	463.431	167.058	-3.22093	down	0.001455	0.0707051	yes	chr5	10415488	10417404	+	2	circRNA	ENST00000449913	MARCH6	chr5:10414502-10415487|chr5:10417404-10423734	membrane associated ring-CH-type finger 6 [Source:HGNC Symbol;Acc:HGNC:30550]
circRNA13575	0	0	0	0	15.7026	0	15.4843	202.052	92.6825	189.312	154.477	0	-5.38023	down	0.001457	0.0707051	yes	chr4	911673	913668	-	3	circRNA	ENST00000314167	GAK	chr4:904779-911672|chr4:913668-932042	cyclin G associated kinase [Source:HGNC Symbol;Acc:HGNC:4113]
circRNA1109	27.7781	0	219.815	55.8361	0	53.3393	0	0	0	21.0347	0	0	4.08415	up	0.001483	0.0715462	yes	chr15	94298201	94298730	+	1	circRNA	ENST00000543482	MCTP2	chr15:94231664-94298200|chr15:94298730-94314281	multiple C2 and transmembrane domain containing 2 [Source:HGNC Symbol;Acc:HGNC:25636]
circRNA4948	0	38.7747	25.8605	13.959	0	13.3348	0	404.104	119.163	231.381	463.431	97.4504	-3.83898	down	0.001484	0.0715462	yes	chr15	42827928	42840433	-	3	circRNA	ENST00000267890	TTBK2	chr15:42817097-42827927|chr15:42840433-42872610	tau tubulin kinase 2 [Source:HGNC Symbol;Acc:HGNC:19141]
circRNA1262	13.8891	51.6996	51.7211	55.8361	125.621	53.3393	170.328	481.817	410.451	283.968	514.924	348.037	-2.64965	down	0.001493	0.0717464	yes	chr19	8455405	8463686	+	4	circRNA	ENST00000348943	HNRNPM	chr19:8445111-8455404|chr19:8463686-8465323	heterogeneous nuclear ribonucleoprotein M [Source:HGNC Symbol;Acc:HGNC:5046]
circRNA5442	0	12.9249	0	0	0	0	0	233.137	92.6825	63.104	120.149	83.5289	-5.51884	down	0.001538	0.0735275	yes	chr18	56758865	56781656	+	3	circRNA	ENST00000357574	WDR7	chr18:56757352-56758864|chr18:56781656-56816030	WD repeat domain 7 [Source:HGNC Symbol;Acc:HGNC:13490]
circRNA23053	0	0	0	0	0	0	0	124.34	66.2018	147.243	85.8206	13.9215	-inf	down	0.00154	0.0735275	yes	chr1	203703652	203722689	+	11	circRNA	ENST00000357681	ATP2B4	chr1:203702079-203703651|chr1:203722689-203723880	ATPase plasma membrane Ca2+ transporting 4 [Source:HGNC Symbol;Acc:HGNC:817]
circRNA2086	13.8891	0	0	0	0	0	0	186.51	119.163	73.6214	188.805	97.4504	-5.58253	down	0.001552	0.0738622	yes	chr5	81615473	81650339	-	3	circRNA	ENST00000320672	SSBP2	chr5:81513717-81615472|chr5:81650339-81750980	single stranded DNA binding protein 2 [Source:HGNC Symbol;Acc:HGNC:15831]
circRNA1893	638.897	0	0	0	0	40.0045	526.467	233.137	357.49	168.277	720.893	0	-1.56324	down	0.001571	0.0745268	yes	chr6	72295937	72333835	+	4	circRNA	ENST00000522211	RIMS1	chr6:72292046-72295936|chr6:72333835-72390597	regulating synaptic membrane exocytosis 1 [Source:HGNC Symbol;Acc:HGNC:17282]
circRNA1761	41.6672	51.6996	25.8605	27.9181	15.7026	0	216.781	217.595	185.365	220.864	291.79	222.744	-3.05684	down	0.001599	0.0756128	yes	chr7	130039464	130049144	-	3	circRNA	ENST00000358303	ZC3HC1	chr7:130029029-130039463|chr7:130049144-130051220	zinc finger C3HC-type containing 1 [Source:HGNC Symbol;Acc:HGNC:29913]
circRNA18153	0	0	0	0	0	0	77.4216	31.085	13.2404	21.0347	240.298	83.5289	-inf	down	0.00164	0.0773046	yes	chr2	24139370	24147086	+	3	circRNA	ENST00000613899	FAM228B	chr2:24135187-24139369|chr2:24147086-24161505	family with sequence similarity 228 member B [Source:HGNC Symbol;Acc:HGNC:24736]
circRNA5450	0	51.6996	77.5816	41.8771	94.2159	66.6741	15.4843	0	0	0	17.1641	13.9215	2.83392	up	0.001665	0.0782339	yes	chr18	62348168	62349937	+	2	circRNA	ENST00000639222	TNFRSF11A	chr18:62325427-62348167|chr18:62349937-62354390	TNF receptor superfamily member 11a [Source:HGNC Symbol;Acc:HGNC:11908]
circRNA16466	0	0	0	0	0	0	30.9686	77.7124	158.884	31.552	51.4924	41.7645	-inf	down	0.001684	0.0788762	yes	chr11	103303093	103323990	+	7	circRNA	ENST00000375735	DYNC2H1	chr11:103287605-103303092|chr11:103323990-103358242	dynein cytoplasmic 2 heavy chain 1 [Source:HGNC Symbol;Acc:HGNC:2962]
circRNA3634	0	90.4743	155.163	55.8361	31.4053	26.6697	0	46.6274	0	10.5173	0	0	2.65349	up	0.001723	0.0804483	yes	chrX	2953143	2955537	-	2	circRNA	ENST00000545496	ARSE	chrX:2949727-2953142|chrX:2955537-2958273	arylsulfatase E (chondrodysplasia punctata 1) [Source:HGNC Symbol;Acc:HGNC:719]
circRNA22058	0	0	0	0	0	0	0	15.5425	66.2018	84.1387	120.149	139.215	-inf	down	0.001753	0.0815208	yes	chr3	48417911	48418363	-	2	circRNA	ENST00000296440	PLXNB1	chr3:48416451-48417910|chr3:48418363-48418448	plexin B1 [Source:HGNC Symbol;Acc:HGNC:9103]
circRNA22251	0	0	0	0	0	0	0	124.34	79.4422	136.725	102.985	0	-inf	down	0.001762	0.0815208	yes	chr3	183643480	183665039	+	4	circRNA	ENST00000242810	KLHL24	chr3:183635793-183643479|chr3:183665039-183671033	kelch like family member 24 [Source:HGNC Symbol;Acc:HGNC:25947]
circRNA2692	13.8891	12.9249	0	0	0	40.0045	0	217.595	145.644	220.864	291.79	153.136	-3.94489	down	0.001765	0.0815208	yes	chr2	62979188	62996766	+	5	circRNA	ENST00000405015	EHBP1	chr2:62955660-62979187|chr2:62996766-63037534	EH domain binding protein 1 [Source:HGNC Symbol;Acc:HGNC:29144]
circRNA7701	0	38.7747	0	0	0	13.3348	0	170.967	145.644	126.208	274.626	139.215	-4.0391	down	0.001768	0.0815208	yes	chr9	122989297	122990213	+	2	circRNA	ENST00000456584	RABGAP1	chr9:122986419-122989296|chr9:122990213-122996040	RAB GTPase activating protein 1 [Source:HGNC Symbol;Acc:HGNC:17155]
circRNA16905	0	0	0	0	0	0	61.9373	155.425	26.4807	0	102.985	83.5289	-inf	down	0.001792	0.0823708	yes	chr15	41069570	41070547	-	2	circRNA	ENST00000361937	INO80	chr15:41059926-41069569|chr15:41070547-41071848	INO80 complex subunit [Source:HGNC Symbol;Acc:HGNC:26956]
circRNA21330	0	0	0	0	0	0	0	93.2549	39.7211	147.243	68.6565	55.686	-inf	down	0.001804	0.0826656	yes	chr7	152145153	152149152	-	3	circRNA	ENST00000262189	KMT2C	chr7:152144881-152145152|chr7:152149152-152150899	lysine methyltransferase 2C [Source:HGNC Symbol;Acc:HGNC:13726]
circRNA19899	0	0	0	0	0	0	0	357.477	0	0	411.939	0	-inf	down	0.001819	0.0827222	yes	chr17	1842803	1853189	+	4	circRNA	ENST00000571058	RPA1	chr17:1829900-1842802|chr17:1853189-1872433	replication protein A1 [Source:HGNC Symbol;Acc:HGNC:10289]
circRNA2580	27.7781	38.7747	0	41.8771	78.5132	40.0045	77.4216	435.189	238.326	305.003	291.79	361.959	-2.9133	down	0.00182	0.0827222	yes	chr3	188609161	188609844	+	1	circRNA	ENST00000448637	LPP	chr3:188524787-188609160|chr3:188609844-188708266	LIM domain containing preferred translocation partner in lipoma [Source:HGNC Symbol;Acc:HGNC:6679]
circRNA762	138.891	38.7747	116.372	307.099	329.755	253.362	340.655	1476.54	860.623	830.87	1150	723.917	-2.18432	down	0.001822	0.0827222	yes	chr17	59353215	59353526	+	1	circRNA	ENST00000312655	YPEL2	chr17:59331824-59353214|chr17:59353526-59388326	yippee like 2 [Source:HGNC Symbol;Acc:HGNC:18326]
circRNA21901	0	0	0	0	0	0	0	108.797	105.923	73.6214	68.6565	41.7645	-inf	down	0.001833	0.0829671	yes	chr4	139137630	139139497	-	2	circRNA	ENST00000394235	ELF2	chr4:139125329-139137629|chr4:139139497-139176966	E74 like ETS transcription factor 2 [Source:HGNC Symbol;Acc:HGNC:3317]
circRNA2805	27.7781	0	0	0	0	0	170.328	93.2549	119.163	63.104	85.8206	41.7645	-4.36761	down	0.001852	0.0834524	yes	chr2	166447612	166472445	-	7	circRNA	ENST00000409855	SCN7A	chr2:166445000-166447611|chr2:166472445-166473798	sodium voltage-gated channel alpha subunit 7 [Source:HGNC Symbol;Acc:HGNC:10594]
circRNA8998	0	0	12.9303	0	0	0	30.9686	108.797	132.404	105.173	223.134	0	-5.53728	down	0.001855	0.0834524	yes	chr19	47725812	47726224	+	1	circRNA	ENST00000263277	EHD2	chr19:47718606-47725811|chr19:47726224-47736368	EH domain containing 2 [Source:HGNC Symbol;Acc:HGNC:3243]
circRNA5333	0	25.8498	51.7211	55.8361	62.8106	26.6697	0	0	0	10.5173	0	0	4.40547	up	0.001913	0.0858009	yes	chr19	33002247	33003000	-	2	circRNA	ENST00000544458	RHPN2	chr19:32999705-33002246|chr19:33003000-33008013	rhophilin Rho GTPase binding protein 2 [Source:HGNC Symbol;Acc:HGNC:19974]
circRNA1845	41.6672	0	0	0	31.4053	0	46.453	233.137	119.163	126.208	257.462	125.293	-3.63484	down	0.001925	0.0859082	yes	chr6	22020339	22020542	+	1	circRNA	ENST00000606851	CASC15	chr6:21979062-22020338|chr6:22020542-22056545	cancer susceptibility 15 (non-protein coding) [Source:HGNC Symbol;Acc:HGNC:28245]
circRNA6366	0	51.6996	0	0	0	0	0	264.222	0	136.725	429.103	125.293	-4.20779	down	0.001927	0.0859082	yes	chr4	10097711	10103986	-	3	circRNA	ENST00000499869	WDR1	chr4:10088741-10097710|chr4:10103986-10116112	WD repeat domain 1 [Source:HGNC Symbol;Acc:HGNC:12754]
circRNA1251	41.6672	0	0	0	15.7026	53.3393	92.9059	124.34	66.2018	294.485	188.805	306.273	-3.27682	down	0.001956	0.0869392	yes	chr19	3660966	3662001	-	2	circRNA	ENST00000335312	PIP5K1C	chr19:3656557-3660965|chr19:3662001-3664821	phosphatidylinositol-4-phosphate 5-kinase type 1 gamma [Source:HGNC Symbol;Acc:HGNC:8996]
circRNA20240	0	0	0	0	0	0	0	155.425	26.4807	105.173	68.6565	55.686	-inf	down	0.002037	0.0902684	yes	chr16	56351384	56355081	+	2	circRNA	ENST00000262493	GNAO1	chr16:56336860-56351383|chr16:56355081-56356102	G protein subunit alpha o1 [Source:HGNC Symbol;Acc:HGNC:4389]
circRNA2517	27.7781	0	25.8605	97.7132	0	0	0	388.562	251.567	231.381	497.76	139.215	-3.31712	down	0.002051	0.0906175	yes	chr3	138570318	138572932	-	4	circRNA	ENST00000264982	CEP70	chr3:138537347-138570317|chr3:138572932-138591853	centrosomal protein 70 [Source:HGNC Symbol;Acc:HGNC:29972]
circRNA19550	0	0	0	0	0	0	0	108.797	105.923	84.1387	137.313	0	-inf	down	0.002068	0.0910966	yes	chr11	74859158	74863021	-	2	circRNA	ENST00000340360	XRRA1	chr11:74852082-74859157|chr11:74863021-74906238	X-ray radiation resistance associated 1 [Source:HGNC Symbol;Acc:HGNC:18868]
circRNA18519	0	0	0	0	0	0	15.4843	139.882	26.4807	42.0693	154.477	41.7645	-inf	down	0.002104	0.0924074	yes	chr1	92563642	92704744	-	15	circRNA	ENST00000370331	EVI5	chr1:92513970-92563641|chr1:92704744-92736397	ecotropic viral integration site 5 [Source:HGNC Symbol;Acc:HGNC:3501]
circRNA18532	0	0	0	0	0	0	139.359	46.6274	66.2018	10.5173	171.641	0	-inf	down	0.002211	0.0964677	yes	chr1	107324282	107324922	+	1	circRNA	ENST00000370071	NTNG1	chr1:107148839-107324281|chr1:107324922-107395153	netrin G1 [Source:HGNC Symbol;Acc:HGNC:23319]
circRNA16388	0	0	0	0	0	0	30.9686	0	0	199.829	68.6565	139.215	-inf	down	0.002214	0.0964677	yes	chr11	14771937	14789242	+	3	circRNA	ENST00000282096	PDE3B	chr11:14645053-14771936|chr11:14789242-14803943	phosphodiesterase 3B [Source:HGNC Symbol;Acc:HGNC:8779]
circRNA18915	0	0	0	0	0	0	0	93.2549	66.2018	52.5867	154.477	41.7645	-inf	down	0.002216	0.0964677	yes	chrX	32216916	32310276	-	3	circRNA	ENST00000378677	DMD	chrX:31968514-32216915|chrX:32310276-32342099	dystrophin [Source:HGNC Symbol;Acc:HGNC:2928]
circRNA22911	0	0	0	0	0	0	0	155.425	39.7211	52.5867	257.462	0	-inf	down	0.00224	0.0972265	yes	chr1	92333391	92345914	+	3	circRNA	ENST00000610020	RPAP2	chr1:92324375-92333390|chr1:92345914-92380723	RNA polymerase II associated protein 2 [Source:HGNC Symbol;Acc:HGNC:25791]
circRNA1055	55.5563	0	77.5816	55.8361	15.7026	26.6697	15.4843	0	0	0	0	0	3.90117	up	0.002295	0.0989443	yes	chr15	71242649	71256715	+	2	circRNA	ENST00000355327	THSD4	chr15:71215399-71242648|chr15:71256715-71411686	thrombospondin type 1 domain containing 4 [Source:HGNC Symbol;Acc:HGNC:25835]
circRNA11781	0	0	0	69.7952	0	0	0	202.052	211.846	94.656	171.641	139.215	-3.55339	down	0.002298	0.0989443	yes	chr6	75634707	75670720	+	6	circRNA	ENST00000370010	SENP6	chr6:75633726-75634706|chr6:75670720-75675434	SUMO1/sentrin specific peptidase 6 [Source:HGNC Symbol;Acc:HGNC:20944]
circRNA5970	0	25.8498	0	0	15.7026	13.3348	46.453	155.425	119.163	136.725	274.626	83.5289	-3.89389	down	0.002303	0.0989443	yes	chr6	18256361	18258405	-	3	circRNA	ENST00000397239	DEK	chr6:18255851-18256360|chr6:18258405-18263842	DEK proto-oncogene [Source:HGNC Symbol;Acc:HGNC:2768]
circRNA18755	0	0	0	0	0	0	30.9686	108.797	66.2018	21.0347	85.8206	55.686	-inf	down	0.002308	0.0989443	yes	chr9	126392066	126421948	+	3	circRNA	ENST00000361171	MVB12B	chr9:126386658-126392065|chr9:126421948-126481368	multivesicular body subunit 12B [Source:HGNC Symbol;Acc:HGNC:23368]
circRNA12623	0	0	0	0	15.7026	26.6697	185.812	0	132.404	147.243	154.477	111.372	-4.10928	down	0.002313	0.0989443	yes	chr12	56562417	56571855	+	4	circRNA	ENST00000262031	RBMS2	chr12:56522089-56562416|chr12:56571855-56581183	RNA binding motif single stranded interacting protein 2 [Source:HGNC Symbol;Acc:HGNC:9909]
circRNA2317	111.113	271.423	64.6514	167.508	188.432	240.027	588.404	46.6274	26.4807	115.691	34.3283	55.686	0.266486	up	0.002367	0.100962	no	chr4	102304317	102315830	-	4	circRNA	ENST00000424970	SLC39A8	chr4:102268079-102304316|chr4:102315830-102344443	solute carrier family 39 member 8 [Source:HGNC Symbol;Acc:HGNC:20862]
circRNA7055	0	155.099	51.7211	0	31.4053	0	0	0	0	0	0	0	inf	up	0.002378	0.10114	yes	chr2	173358712	173359491	+	2	circRNA	ENST00000306721	CDCA7	chr2:173354984-173358711|chr2:173359491-173363225	cell division cycle associated 7 [Source:HGNC Symbol;Acc:HGNC:14628]
circRNA8007	0	0	90.5119	139.59	31.4053	26.6697	15.4843	0	0	0	0	0	4.21808	up	0.002411	0.10225	yes	chrX	85345860	85367766	-	4	circRNA	ENST00000262753	POF1B	chrX:85331079-85345859|chrX:85367766-85379172	premature ovarian failure, 1B [Source:HGNC Symbol;Acc:HGNC:13711]
circRNA19856	0	0	0	0	0	0	0	46.6274	0	420.693	17.1641	41.7645	-inf	down	0.002422	0.102423	yes	chr10	115461941	115469329	+	3	circRNA	ENST00000355044	ATRNL1	chr10:115426302-115461940|chr10:115469329-115519262	attractin like 1 [Source:HGNC Symbol;Acc:HGNC:29063]
circRNA409	13.8891	64.6245	64.6514	125.631	0	26.6697	170.328	373.019	344.249	220.864	566.416	208.822	-2.6725	down	0.002455	0.103523	yes	chr11	73707420	73720899	-	4	circRNA	ENST00000310653	RAB6A	chr11:73679720-73707419|chr11:73720899-73730764	RAB6A, member RAS oncogene family [Source:HGNC Symbol;Acc:HGNC:9786]
circRNA16299	0	0	0	0	0	0	15.4843	93.2549	26.4807	31.552	102.985	111.372	-inf	down	0.002478	0.103984	yes	chr12	82965024	82986046	+	4	circRNA	ENST00000321196	TMTC2	chr12:82930545-82965023|chr12:82986046-83030797	transmembrane and tetratricopeptide repeat containing 2 [Source:HGNC Symbol;Acc:HGNC:25440]
circRNA20682	0	0	0	0	0	0	0	77.7124	119.163	31.552	51.4924	97.4504	-inf	down	0.00248	0.103984	yes	chr19	9656547	9659467	-	3	circRNA	ENST00000453372	ZNF562	chr19:9653881-9656546|chr19:9659467-9660719	zinc finger protein 562 [Source:HGNC Symbol;Acc:HGNC:25950]
circRNA18046	0	0	0	0	0	0	30.9686	93.2549	66.2018	73.6214	120.149	0	-inf	down	0.002501	0.104569	yes	chr3	119503532	119513719	+	3	circRNA	ENST00000494664	TIMMDC1	chr3:119500860-119503531|chr3:119513719-119517204	translocase of inner mitochondrial membrane domain containing 1 [Source:HGNC Symbol;Acc:HGNC:1321]
circRNA19262	0	0	0	0	0	0	0	15.5425	66.2018	42.0693	240.298	83.5289	-inf	down	0.00251	0.104649	yes	chr12	68302620	68302872	-	1	circRNA	ENST00000540418	MDM1	chr12:68296982-68302619|chr12:68302872-68313442	Mdm1 nuclear protein [Source:HGNC Symbol;Acc:HGNC:29917]
circRNA21724	0	0	0	0	0	0	0	170.967	66.2018	21.0347	120.149	41.7645	-inf	down	0.00254	0.105603	yes	chr5	173108624	173123202	+	4	circRNA	ENST00000296953	CREBRF	chr5:173091401-173108623|chr5:173123202-173133629	CREB3 regulatory factor [Source:HGNC Symbol;Acc:HGNC:24050]
circRNA17612	0	0	0	0	0	0	30.9686	62.1699	105.923	63.104	0	83.5289	-inf	down	0.002562	0.10571	yes	chr6	143470961	143474856	+	5	circRNA	ENST00000367591	PEX3	chr6:143468165-143470960|chr6:143474856-143479075	peroxisomal biogenesis factor 3 [Source:HGNC Symbol;Acc:HGNC:8858]
circRNA7773	0	142.174	155.163	55.8361	47.1079	66.6741	201.296	481.817	423.692	410.176	686.565	250.587	-2.39386	down	0.002562	0.10571	yes	chr8	37765526	37766355	+	3	circRNA	ENST00000328195	PLPBP	chr8:37762758-37765525|chr8:37766355-37772754	pyridoxal phosphate binding protein [Source:HGNC Symbol;Acc:HGNC:9457]
circRNA6	41.6672	12.9249	25.8605	27.9181	0	40.0045	0	466.274	278.048	136.725	429.103	334.116	-3.47012	down	0.002564	0.10571	yes	chrX	10566888	10567603	-	1	circRNA	ENST00000317552	MID1	chrX:10523187-10566887|chrX:10567603-10620289	midline 1 [Source:HGNC Symbol;Acc:HGNC:7095]
circRNA5939	0	38.7747	0	0	0	0	123.875	77.7124	105.923	84.1387	171.641	69.6074	-4.02878	down	0.002573	0.105786	yes	chr7	152249876	152250966	-	2	circRNA	ENST00000262189	KMT2C	chr7:152248620-152249875|chr7:152250966-152251938	lysine methyltransferase 2C [Source:HGNC Symbol;Acc:HGNC:13726]
circRNA2309	13.8891	64.6245	25.8605	55.8361	78.5132	93.3438	123.875	435.189	397.211	347.072	377.611	348.037	-2.61122	down	0.002599	0.106188	yes	chr4	87195324	87195690	-	1	circRNA	ENST00000273963	KLHL8	chr4:87185799-87195323|chr4:87195690-87220417	kelch like family member 8 [Source:HGNC Symbol;Acc:HGNC:18644]
circRNA16427	0	0	0	0	0	0	15.4843	186.51	66.2018	52.5867	34.3283	27.843	-inf	down	0.002606	0.106188	yes	chr11	66521270	66523882	+	3	circRNA	ENST00000419755	AP002748.4	chr11:66519748-66521269|chr11:66523882-66526122	NA
circRNA12694	0	0	0	0	15.7026	0	61.9373	62.1699	52.9614	21.0347	154.477	180.979	-5.08657	down	0.002615	0.106188	yes	chr11	3773632	3776021	-	2	circRNA	ENST00000324932	NUP98	chr11:3771928-3773631|chr11:3776021-3778872	nucleoporin 98 [Source:HGNC Symbol;Acc:HGNC:8068]
circRNA328	41.6672	12.9249	0	13.959	15.7026	13.3348	30.9686	248.68	119.163	189.312	291.79	222.744	-3.49813	down	0.002622	0.106188	yes	chr11	1000432	1003804	+	2	circRNA	ENST00000332231	AP2A2	chr11:994245-1000431|chr11:1003804-1006527	adaptor related protein complex 2 alpha 2 subunit [Source:HGNC Symbol;Acc:HGNC:562]
circRNA9841	0	0	12.9303	0	0	0	30.9686	46.6274	105.923	42.0693	188.805	111.372	-5.3456	down	0.002622	0.106188	yes	chr4	148023263	148047051	+	2	circRNA	ENST00000336498	ARHGAP10	chr4:147966839-148023262|chr4:148047051-148063147	Rho GTPase activating protein 10 [Source:HGNC Symbol;Acc:HGNC:26099]
circRNA23224	0	0	0	0	0	0	0	62.1699	52.9614	84.1387	120.149	55.686	-inf	down	0.002626	0.106188	yes	chr9	76846515	76854208	-	3	circRNA	ENST00000376718	PRUNE2	chr9:76826732-76846514|chr9:76854208-76905927	prune homolog 2 [Source:HGNC Symbol;Acc:HGNC:25209]
circRNA1110	55.5563	90.4743	90.5119	139.59	15.7026	40.0045	92.9059	31.085	0	21.0347	0	0	1.57419	up	0.002633	0.106188	yes	chr15	94356137	94402019	+	9	circRNA	ENST00000456504	MCTP2	chr15:94345164-94356136|chr15:94402019-94440175	multiple C2 and transmembrane domain containing 2 [Source:HGNC Symbol;Acc:HGNC:25636]
circRNA14403	0	0	0	0	0	93.3438	77.4216	217.595	158.884	126.208	137.313	55.686	-3.05004	down	0.002674	0.106622	yes	chr12	111509549	111510582	-	3	circRNA	ENST00000389153	ATXN2	chr12:111488780-111509548|chr12:111510582-111513356	ataxin 2 [Source:HGNC Symbol;Acc:HGNC:10555]
circRNA3136	13.8891	0	0	0	15.7026	0	61.9373	93.2549	92.6825	84.1387	240.298	55.686	-4.40749	down	0.002683	0.106622	yes	chr1	108148279	108161293	-	4	circRNA	ENST00000565488	SLC25A24	chr1:108143710-108148278|chr1:108161293-108181940	solute carrier family 25 member 24 [Source:HGNC Symbol;Acc:HGNC:20662]
circRNA1729	13.8891	25.8498	0	69.7952	47.1079	93.3438	247.749	295.307	251.567	199.829	343.283	250.587	-2.66759	down	0.002683	0.106622	yes	chr7	102227367	102227669	+	1	circRNA	ENST00000360264	CUX1	chr7:102205170-102227366|chr7:102227669-102234051	cut like homeobox 1 [Source:HGNC Symbol;Acc:HGNC:2557]
circRNA218	41.6672	25.8498	0	0	31.4053	26.6697	92.9059	217.595	172.125	199.829	291.79	167.058	-3.18387	down	0.002684	0.106622	yes	chr12	42210355	42210680	-	2	circRNA	ENST00000546726	YAF2	chr12:42199235-42210354|chr12:42210680-42237598	YY1 associated factor 2 [Source:HGNC Symbol;Acc:HGNC:17363]
circRNA22135	0	0	0	0	0	0	0	77.7124	92.6825	84.1387	120.149	13.9215	-inf	down	0.002695	0.106622	yes	chr3	119503532	119517315	+	4	circRNA	ENST00000494664	TIMMDC1	chr3:119500860-119503531|chr3:119517315-119523605	translocase of inner mitochondrial membrane domain containing 1 [Source:HGNC Symbol;Acc:HGNC:1321]
circRNA7336	0	12.9249	0	0	0	26.6697	30.9686	124.34	66.2018	52.5867	188.805	236.665	-4.14309	down	0.002697	0.106622	yes	chr1	85164526	85164757	-	1	circRNA	ENST00000341460	SYDE2	chr1:85159249-85164525|chr1:85164757-85169043	synapse defective Rho GTPase homolog 2 [Source:HGNC Symbol;Acc:HGNC:25841]
circRNA16096	0	0	0	0	0	0	108.39	15.5425	52.9614	31.552	85.8206	55.686	-inf	down	0.002702	0.106622	yes	chrX	11169505	11188984	-	6	circRNA	ENST00000380736	ARHGAP6	chrX:11156626-11169504|chrX:11188984-11196924	Rho GTPase activating protein 6 [Source:HGNC Symbol;Acc:HGNC:676]
circRNA10740	0	0	12.9303	0	0	0	0	77.7124	92.6825	63.104	240.298	97.4504	-5.46529	down	0.002716	0.106622	yes	chr9	76629192	76644912	-	5	circRNA	ENST00000376717	PRUNE2	chr9:76624490-76629191|chr9:76644912-76652482	prune homolog 2 [Source:HGNC Symbol;Acc:HGNC:25209]
circRNA2571	41.6672	0	0	55.8361	0	40.0045	61.9373	357.477	172.125	241.899	463.431	83.5289	-3.3275	down	0.00272	0.106622	yes	chr3	183643480	183672484	+	6	circRNA	ENST00000242810	KLHL24	chr3:183635793-183643479|chr3:183672484-183679085	kelch like family member 24 [Source:HGNC Symbol;Acc:HGNC:25947]
circRNA9964	0	0	168.094	237.304	62.8106	120.013	0	823.751	304.528	483.798	978.355	682.153	-2.476	down	0.002723	0.106622	yes	chr3	63912588	63913225	+	2	circRNA	ENST00000474112	ATXN7	chr3:63898497-63912587|chr3:63913225-63952378	ataxin 7 [Source:HGNC Symbol;Acc:HGNC:10560]
circRNA20613	0	0	0	0	0	0	0	155.425	119.163	0	0	167.058	-inf	down	0.002723	0.106622	yes	chr14	79692173	79805190	+	3	circRNA	ENST00000635466	NRXN3	chr14:79663949-79692172|chr14:79805190-79861341	neurexin 3 [Source:HGNC Symbol;Acc:HGNC:8010]
circRNA17916	0	0	0	0	0	0	30.9686	31.085	39.7211	84.1387	85.8206	69.6074	-inf	down	0.002735	0.106721	yes	chr4	147864846	147881932	+	5	circRNA	ENST00000336498	ARHGAP10	chr4:147857654-147864845|chr4:147881932-147906637	Rho GTPase activating protein 10 [Source:HGNC Symbol;Acc:HGNC:26099]
circRNA14476	0	0	0	0	0	13.3348	30.9686	155.425	79.4422	105.173	154.477	27.843	-5.37487	down	0.002758	0.106721	yes	chr11	68596097	68610023	+	5	circRNA	ENST00000393800	PPP6R3	chr11:68591706-68596096|chr11:68610023-68613065	protein phosphatase 6 regulatory subunit 3 [Source:HGNC Symbol;Acc:HGNC:1173]
circRNA22097	0	0	0	0	0	0	0	77.7124	185.365	84.1387	0	41.7645	-inf	down	0.00276	0.106721	yes	chr3	66398970	66413014	-	5	circRNA	ENST00000273261	LRIG1	chr3:66398183-66398969|chr3:66413014-66414919	leucine rich repeats and immunoglobulin like domains 1 [Source:HGNC Symbol;Acc:HGNC:17360]
circRNA19879	0	0	0	0	0	0	0	108.797	26.4807	84.1387	85.8206	69.6074	-inf	down	0.002767	0.106721	yes	chr10	123797976	123799199	-	2	circRNA	ENST00000368854	CPXM2	chr10:123780255-123797975|chr10:123799199-123842348	carboxypeptidase X, M14 family member 2 [Source:HGNC Symbol;Acc:HGNC:26977]
circRNA12233	0	0	0	27.9181	0	0	0	186.51	251.567	73.6214	171.641	27.843	-4.67095	down	0.002772	0.106721	yes	chr2	239156652	239176563	-	3	circRNA	ENST00000345617	HDAC4	chr2:239144714-239156651|chr2:239176563-239189832	histone deacetylase 4 [Source:HGNC Symbol;Acc:HGNC:14063]
circRNA5926	0	12.9249	0	0	0	0	46.453	124.34	66.2018	84.1387	154.477	27.843	-5.28363	down	0.002775	0.106721	yes	chr7	140776912	140808995	-	10	circRNA	ENST00000288602	BRAF	chr7:140754233-140776911|chr7:140808995-140834608	B-Raf proto-oncogene, serine/threonine kinase [Source:HGNC Symbol;Acc:HGNC:1097]
circRNA2505	27.7781	0	38.7908	41.8771	31.4053	13.3348	77.4216	295.307	264.807	252.416	257.462	153.136	-3.08576	down	0.002776	0.106721	yes	chr3	128806372	128807671	+	2	circRNA	ENST00000265062	RAB7A	chr3:128798069-128806371|chr3:128807671-128813326	RAB7A, member RAS oncogene family [Source:HGNC Symbol;Acc:HGNC:9788]
circRNA17248	0	0	0	0	0	0	15.4843	77.7124	211.846	0	85.8206	27.843	-inf	down	0.002784	0.106751	yes	chr22	31095303	31097338	+	5	circRNA	ENST00000358743	SMTN	chr22:31091847-31095302|chr22:31097338-31098666	smoothelin [Source:HGNC Symbol;Acc:HGNC:11126]
circRNA18075	0	0	0	0	0	0	108.39	62.1699	105.923	84.1387	0	0	-inf	down	0.002831	0.108273	yes	chr3	138570318	138571356	-	3	circRNA	ENST00000264982	CEP70	chr3:138537347-138570317|chr3:138571356-138572858	centrosomal protein 70 [Source:HGNC Symbol;Acc:HGNC:29972]
circRNA3620	83.3344	0	0	0	31.4053	0	201.296	0	291.288	199.829	480.596	0	-3.35378	down	0.002839	0.108299	yes	chr8	140789474	140890769	-	12	circRNA	ENST00000522684	PTK2	chr8:140764290-140789473|chr8:140890769-140925660	protein tyrosine kinase 2 [Source:HGNC Symbol;Acc:HGNC:9611]
circRNA19365	0	0	0	0	0	0	0	62.1699	92.6825	31.552	120.149	69.6074	-inf	down	0.002857	0.108706	yes	chr12	112319225	112319742	-	1	circRNA	ENST00000550722	HECTD4	chr12:112314546-112319224|chr12:112319742-112381951	HECT domain E3 ubiquitin protein ligase 4 [Source:HGNC Symbol;Acc:HGNC:26611]
circRNA24264	0	0	0	0	0	0	0	0	66.2018	157.76	68.6565	97.4504	-inf	down	0.002875	0.10911	yes	chr17	21017942	21021226	-	3	circRNA	ENST00000261497	USP22	chr17:21015899-21017941|chr17:21021226-21028541	ubiquitin specific peptidase 22 [Source:HGNC Symbol;Acc:HGNC:12621]
circRNA6377	0	25.8498	25.8605	0	0	0	108.39	139.882	105.923	31.552	171.641	194.901	-3.86276	down	0.002942	0.110652	yes	chr4	25333183	25333988	+	2	circRNA	ENST00000505451	ZCCHC4	chr4:25315400-25333182|chr4:25333988-25345547	zinc finger CCHC-type containing 4 [Source:HGNC Symbol;Acc:HGNC:22917]
circRNA4938	0	25.8498	0	0	0	13.3348	30.9686	202.052	79.4422	63.104	205.97	111.372	-4.1443	down	0.002943	0.110652	yes	chr15	40744047	40745259	-	2	circRNA	ENST00000260385	RMDN3	chr15:40740193-40744046|chr15:40745259-40751425	regulator of microtubule dynamics 3 [Source:HGNC Symbol;Acc:HGNC:25550]
circRNA2088	13.8891	0	0	0	0	26.6697	30.9686	202.052	132.404	147.243	120.149	83.5289	-4.14257	down	0.002946	0.110652	yes	chr5	84060300	84066606	-	3	circRNA	ENST00000296591	EDIL3	chr5:83963360-84060299|chr5:84066606-84106648	EGF like repeats and discoidin domains 3 [Source:HGNC Symbol;Acc:HGNC:3173]
circRNA9778	0	0	12.9303	13.959	0	13.3348	15.4843	108.797	158.884	105.173	154.477	153.136	-4.11286	down	0.002947	0.110652	yes	chr4	38054199	38103157	+	4	circRNA	ENST00000508802	TBC1D1	chr4:38053225-38054198|chr4:38103157-38115709	TBC1 domain family member 1 [Source:HGNC Symbol;Acc:HGNC:11578]
circRNA764	125.002	103.399	168.094	83.7542	188.432	66.6741	232.265	901.464	635.537	420.693	1098.5	501.174	-2.36555	down	0.002953	0.110652	yes	chr17	59731421	59738947	+	4	circRNA	ENST00000262291	VMP1	chr17:59707748-59731420|chr17:59738947-59764970	vacuole membrane protein 1 [Source:HGNC Symbol;Acc:HGNC:29559]
circRNA18954	0	0	0	0	0	0	0	93.2549	39.7211	42.0693	68.6565	125.293	-inf	down	0.002969	0.11097	yes	chrX	71421309	71424238	+	4	circRNA	ENST00000423759	TAF1	chrX:71408151-71421308|chrX:71424238-71454169	TATA-box binding protein associated factor 1 [Source:HGNC Symbol;Acc:HGNC:11535]
circRNA2663	55.5563	38.7747	38.7908	0	0	40.0045	0	0	0	0	0	0	inf	up	0.002995	0.11166	yes	chr2	47378953	47379969	+	2	circRNA	ENST00000405271	EPCAM	chr2:47377077-47378952|chr2:47379969-47385165	epithelial cell adhesion molecule [Source:HGNC Symbol;Acc:HGNC:11529]
circRNA4485	0	51.6996	0	13.959	31.4053	80.009	154.843	233.137	92.6825	178.795	308.954	278.43	-2.81586	down	0.003003	0.111677	yes	chr10	126970702	127000307	+	9	circRNA	ENST00000280333	DOCK1	chr10:126905563-126970701|chr10:127000307-127008731	dedicator of cytokinesis 1 [Source:HGNC Symbol;Acc:HGNC:2987]
circRNA27	41.6672	0	103.442	69.7952	0	40.0045	139.359	155.425	383.97	305.003	308.954	250.587	-2.59796	down	0.003041	0.112807	yes	chrX	47846105	47895940	+	3	circRNA	ENST00000376954	ZNF81	chrX:47842768-47846104|chrX:47895940-47914923	zinc finger protein 81 [Source:HGNC Symbol;Acc:HGNC:13156]
circRNA2626	55.5563	77.5494	0	0	94.2159	0	170.328	404.104	132.404	178.795	291.79	194.901	-2.59381	down	0.003053	0.112969	yes	chr2	26263380	26277160	+	4	circRNA	ENST00000448743	HADHB	chr2:26254474-26263379|chr2:26277160-26278613	hydroxyacyl-CoA dehydrogenase/3-ketoacyl-CoA thiolase/enoyl-CoA hydratase (trifunctional protein), beta subunit [Source:HGNC Symbol;Acc:HGNC:4803]
circRNA21328	0	0	0	0	0	0	0	108.797	39.7211	42.0693	137.313	55.686	-inf	down	0.003089	0.113806	yes	chr7	152138796	152149152	-	7	circRNA	ENST00000262189	KMT2C	chr7:152136924-152138795|chr7:152149152-152150899	lysine methyltransferase 2C [Source:HGNC Symbol;Acc:HGNC:13726]
circRNA19477	0	0	0	0	0	0	0	108.797	52.9614	42.0693	34.3283	125.293	-inf	down	0.003091	0.113806	yes	chr11	20083007	20097745	+	6	circRNA	ENST00000360655	NAV2	chr11:20080209-20083006|chr11:20097745-20100936	neuron navigator 2 [Source:HGNC Symbol;Acc:HGNC:15997]
circRNA2552	111.113	206.799	168.094	153.549	298.35	253.362	402.592	1196.77	516.374	767.766	1373.13	1044.11	-2.1537	down	0.003099	0.113817	yes	chr3	170145423	170149244	-	2	circRNA	ENST00000495893	PHC3	chr3:170136665-170145422|chr3:170149244-170171372	polyhomeotic homolog 3 [Source:HGNC Symbol;Acc:HGNC:15682]
circRNA8237	0	0	12.9303	0	0	13.3348	0	279.765	105.923	63.104	120.149	111.372	-4.69498	down	0.003114	0.114085	yes	chr12	124372022	124372610	-	1	circRNA	ENST00000405201	NCOR2	chr12:124363799-124372021|chr12:124372610-124374412	nuclear receptor corepressor 2 [Source:HGNC Symbol;Acc:HGNC:7673]
circRNA3188	55.5563	116.324	90.5119	223.345	219.837	146.683	526.467	761.581	648.778	504.832	1029.85	417.645	-2.19009	down	0.003124	0.114169	yes	chr1	155676548	155679512	-	2	circRNA	ENST00000368339	YY1AP1	chr1:155675096-155676547|chr1:155679512-155680415	YY1 associated protein 1 [Source:HGNC Symbol;Acc:HGNC:30935]
circRNA18718	0	0	0	0	0	0	61.9373	77.7124	0	115.691	51.4924	41.7645	-inf	down	0.003169	0.115528	yes	chr9	97369922	97371706	+	3	circRNA	ENST00000375206	AL512590.3	chr9:97366700-97369921|chr9:97371706-97374542	NA
circRNA14135	0	0	0	0	15.7026	0	15.4843	155.425	92.6825	115.691	51.4924	83.5289	-5.03354	down	0.003187	0.115899	yes	chr9	127890637	127891043	-	1	circRNA	ENST00000291839	ST6GALNAC6	chr9:127887591-127890636|chr9:127891043-127894511	ST6 N-acetylgalactosaminide alpha-2,6-sialyltransferase 6 [Source:HGNC Symbol;Acc:HGNC:23364]
circRNA21230	0	0	0	0	0	0	0	108.797	79.4422	21.0347	137.313	41.7645	-inf	down	0.003201	0.115983	yes	chr7	84129123	84194668	-	3	circRNA	ENST00000436949	SEMA3A	chr7:84110589-84129122|chr7:84194668-84195363	semaphorin 3A [Source:HGNC Symbol;Acc:HGNC:10723]
circRNA2482	97.2234	168.024	90.5119	223.345	251.242	173.353	340.655	1181.23	847.383	757.248	823.878	584.703	-2.17581	down	0.003213	0.115983	yes	chr3	114350274	114351878	-	1	circRNA	ENST00000357258	ZBTB20	chr3:114339426-114350273|chr3:114351878-114380216	zinc finger and BTB domain containing 20 [Source:HGNC Symbol;Acc:HGNC:13503]
circRNA337	13.8891	0	0	0	0	0	15.4843	170.967	132.404	52.5867	120.149	55.686	-5.30025	down	0.003238	0.115983	yes	chr11	8413495	8464822	-	9	circRNA	ENST00000447869	STK33	chr11:8392710-8413494|chr11:8464822-8473162	serine/threonine kinase 33 [Source:HGNC Symbol;Acc:HGNC:14568]
circRNA3318	97.2234	0	0	0	0	0	61.9373	170.967	105.923	178.795	102.985	97.4504	-2.88472	down	0.003242	0.115983	yes	chr9	14146689	14179780	-	4	circRNA	ENST00000543693	NFIB	chr9:14125766-14146688|chr9:14179780-14180658	nuclear factor I B [Source:HGNC Symbol;Acc:HGNC:7785]
circRNA3011	180.558	51.6996	103.442	0	94.2159	120.013	309.686	450.732	476.653	357.589	738.057	348.037	-2.28532	down	0.003242	0.115983	yes	chr1	35358925	35361789	+	3	circRNA	ENST00000314607	ZMYM4	chr1:35325405-35358924|chr1:35361789-35370028	zinc finger MYM-type containing 4 [Source:HGNC Symbol;Acc:HGNC:13055]
circRNA765	27.7781	38.7747	12.9303	13.959	15.7026	13.3348	123.875	155.425	185.365	115.691	360.447	222.744	-3.24791	down	0.003245	0.115983	yes	chr17	59731421	59773885	+	6	circRNA	ENST00000262291	VMP1	chr17:59707748-59731420|chr17:59773885-59808795	vacuole membrane protein 1 [Source:HGNC Symbol;Acc:HGNC:29559]
circRNA13553	0	0	0	0	31.4053	0	30.9686	46.6274	132.404	105.173	137.313	111.372	-4.16625	down	0.003249	0.115983	yes	chr5	140167365	140167802	+	2	circRNA	ENST00000523154	AC011379.2	chr5:140164812-140167364|chr5:140167802-140168636	NA
circRNA1332	41.6672	0	12.9303	0	47.1079	26.6697	108.39	186.51	185.365	94.656	257.462	250.587	-3.07656	down	0.003252	0.115983	yes	chr18	9195551	9221999	+	6	circRNA	ENST00000262126	ANKRD12	chr18:9182519-9195550|chr18:9221999-9254210	ankyrin repeat domain 12 [Source:HGNC Symbol;Acc:HGNC:29135]
circRNA19476	0	0	0	0	0	0	0	93.2549	79.4422	21.0347	34.3283	139.215	-inf	down	0.003272	0.116416	yes	chr11	20083007	20103724	+	9	circRNA	ENST00000360655	NAV2	chr11:20080209-20083006|chr11:20103724-20105530	neuron navigator 2 [Source:HGNC Symbol;Acc:HGNC:15997]
circRNA16531	0	0	0	0	0	0	46.453	108.797	0	63.104	102.985	41.7645	-inf	down	0.00329	0.116775	yes	chr10	26759062	26770345	-	4	circRNA	ENST00000376170	ABI1	chr10:26751783-26759061|chr10:26770345-26771074	abl interactor 1 [Source:HGNC Symbol;Acc:HGNC:11320]
circRNA18307	0	0	0	0	0	0	61.9373	46.6274	132.404	52.5867	51.4924	0	-inf	down	0.003319	0.117523	yes	chr2	169603642	169614724	+	8	circRNA	ENST00000260970	PPIG	chr2:169584490-169603641|chr2:169614724-169630773	peptidylprolyl isomerase G [Source:HGNC Symbol;Acc:HGNC:14650]
circRNA1787	13.8891	64.6245	103.442	27.9181	78.5132	26.6697	232.265	186.51	503.134	262.933	463.431	236.665	-2.58083	down	0.003398	0.120033	yes	chr7	140702866	140704963	+	2	circRNA	ENST00000482954	NDUFB2	chr7:140700959-140702865|chr7:140704963-140706562	NADH:ubiquinone oxidoreductase subunit B2 [Source:HGNC Symbol;Acc:HGNC:7697]
circRNA9956	0	0	142.233	223.345	0	293.366	402.592	699.412	516.374	389.141	961.191	0	-2.17161	down	0.003451	0.121615	yes	chr3	56592970	56594028	+	3	circRNA	ENST00000394672	CCDC66	chr3:56571302-56592969|chr3:56594028-56613588	coiled-coil domain containing 66 [Source:HGNC Symbol;Acc:HGNC:27709]
circRNA2858	208.336	142.174	90.5119	55.8361	235.54	40.0045	681.31	870.379	450.172	241.899	720.893	501.174	-2.16578	down	0.003481	0.122381	yes	chr2	202464809	202467689	+	2	circRNA	ENST00000374580	BMPR2	chr2:202377550-202464808|chr2:202467689-202513718	bone morphogenetic protein receptor type 2 [Source:HGNC Symbol;Acc:HGNC:1078]
circRNA5936	0	90.4743	0	0	47.1079	66.6741	92.9059	202.052	119.163	168.277	360.447	361.959	-2.67538	down	0.003523	0.123564	yes	chr7	151484737	151498180	-	3	circRNA	ENST00000478470	RHEB	chr7:151477415-151484736|chr7:151498180-151519459	Ras homolog enriched in brain [Source:HGNC Symbol;Acc:HGNC:10011]
circRNA3685	0	38.7747	38.7908	27.9181	0	53.3393	0	0	0	0	0	0	inf	up	0.003533	0.123622	yes	chrX	100862171	100863595	-	5	circRNA	ENST00000372966	NOX1	chrX:100851325-100862170|chrX:100863595-100870718	NADPH oxidase 1 [Source:HGNC Symbol;Acc:HGNC:7889]
circRNA237	13.8891	0	0	0	0	13.3348	15.4843	108.797	105.923	136.725	137.313	111.372	-4.49908	down	0.003593	0.125425	yes	chr12	51073823	51074082	-	1	circRNA	ENST00000228515	CSRNP2	chr12:51067969-51073822|chr12:51074082-51076410	cysteine and serine rich nuclear protein 2 [Source:HGNC Symbol;Acc:HGNC:16006]
circRNA15930	0	0	0	0	0	26.6697	0	186.51	79.4422	52.5867	102.985	167.058	-4.46397	down	0.003641	0.126801	yes	chr1	231370562	231374099	-	2	circRNA	ENST00000366641	EGLN1	chr1:231367636-231370561|chr1:231374099-231420997	egl-9 family hypoxia inducible factor 1 [Source:HGNC Symbol;Acc:HGNC:1232]
circRNA21751	0	0	0	0	0	0	0	93.2549	39.7211	31.552	188.805	41.7645	-inf	down	0.003675	0.127628	yes	chr4	3253207	3253482	+	1	circRNA	ENST00000507492	MSANTD1	chr4:3249542-3253206|chr4:3253482-3255724	Myb/SANT DNA binding domain containing 1 [Source:HGNC Symbol;Acc:HGNC:33741]
circRNA1898	27.7781	129.249	0	13.959	31.4053	13.3348	139.359	341.935	172.125	210.347	240.298	194.901	-2.59009	down	0.003682	0.127628	yes	chr6	75634707	75663518	+	4	circRNA	ENST00000370010	SENP6	chr6:75633726-75634706|chr6:75663518-75666711	SUMO1/sentrin specific peptidase 6 [Source:HGNC Symbol;Acc:HGNC:20944]
circRNA7726	0	12.9249	0	0	0	0	0	139.882	132.404	94.656	85.8206	41.7645	-5.25782	down	0.003711	0.128333	yes	chr9	129899965	129900547	-	2	circRNA	ENST00000446176	FNBP1	chr9:129895996-129899964|chr9:129900547-129902868	formin binding protein 1 [Source:HGNC Symbol;Acc:HGNC:17069]
circRNA3348	27.7781	129.249	64.6514	55.8361	125.621	160.018	216.781	559.529	436.932	441.728	566.416	515.095	-2.28072	down	0.003738	0.128965	yes	chr9	37424845	37426654	+	3	circRNA	ENST00000493368	GRHPR	chr9:37422805-37424844|chr9:37426654-37428483	glyoxylate and hydroxypyruvate reductase [Source:HGNC Symbol;Acc:HGNC:4570]
circRNA20945	0	0	0	0	0	0	0	77.7124	0	105.173	188.805	41.7645	-inf	down	0.003768	0.129698	yes	chr22	35746473	35765483	-	5	circRNA	ENST00000405409	RBFOX2	chr22:35745995-35746472|chr22:35765483-35768256	RNA binding protein, fox-1 homolog 2 [Source:HGNC Symbol;Acc:HGNC:9906]
circRNA20176	0	0	0	0	0	0	0	170.967	0	31.552	154.477	69.6074	-inf	down	0.003848	0.132144	yes	chr16	15771569	15778843	-	3	circRNA	ENST00000396324	MYH11	chr16:15763891-15771568|chr16:15778843-15782384	myosin heavy chain 11 [Source:HGNC Symbol;Acc:HGNC:7569]
circRNA9202	0	0	25.8605	41.8771	62.8106	26.6697	0	0	0	0	0	0	inf	up	0.003875	0.132696	yes	chr21	43746079	43749080	+	2	circRNA	ENST00000468090	PDXK	chr21:43741771-43746078|chr21:43749080-43750499	pyridoxal kinase [Source:HGNC Symbol;Acc:HGNC:8819]
circRNA3222	27.7781	77.5494	0	0	0	0	92.9059	186.51	132.404	84.1387	205.97	153.136	-3.02115	down	0.003882	0.132696	yes	chr1	179131311	179133374	-	2	circRNA	ENST00000502732	ABL2	chr1:179126672-179131310|chr1:179133374-179229240	ABL proto-oncogene 2, non-receptor tyrosine kinase [Source:HGNC Symbol;Acc:HGNC:77]
circRNA22539	0	0	0	0	0	0	0	186.51	0	31.552	137.313	69.6074	-inf	down	0.003895	0.132834	yes	chr2	159337567	159395834	-	13	circRNA	ENST00000392782	BAZ2B	chr2:159337077-159337566|chr2:159395834-159397344	bromodomain adjacent to zinc finger domain 2B [Source:HGNC Symbol;Acc:HGNC:963]
circRNA8261	0	0	12.9303	0	15.7026	0	15.4843	93.2549	105.923	73.6214	171.641	125.293	-4.35323	down	0.003914	0.133175	yes	chr11	11327086	11341004	-	3	circRNA	ENST00000227756	GALNT18	chr11:11293193-11327085|chr11:11341004-11372514	polypeptide N-acetylgalactosaminyltransferase 18 [Source:HGNC Symbol;Acc:HGNC:30488]
circRNA2205	13.8891	0	0	27.9181	62.8106	0	77.4216	108.797	225.086	136.725	223.134	125.293	-3.09911	down	0.004086	0.138708	yes	chr4	5663107	5665649	-	2	circRNA	ENST00000475313	EVC2	chr4:5640838-5663106|chr4:5665649-5681259	EvC ciliary complex subunit 2 [Source:HGNC Symbol;Acc:HGNC:19747]
circRNA986	41.6672	0	0	13.959	47.1079	0	0	310.85	158.884	157.76	394.775	111.372	-3.46398	down	0.004189	0.14188	yes	chr15	44328685	44338317	+	3	circRNA	ENST00000557945	CASC4	chr15:44323019-44328684|chr15:44338317-44348542	cancer susceptibility 4 [Source:HGNC Symbol;Acc:HGNC:24892]
circRNA17165	0	0	0	0	0	0	30.9686	15.5425	132.404	31.552	17.1641	97.4504	-inf	down	0.004204	0.142063	yes	chr18	8244058	8253414	+	5	circRNA	ENST00000580170	PTPRM	chr18:8143779-8244057|chr18:8253414-8296367	protein tyrosine phosphatase, receptor type M [Source:HGNC Symbol;Acc:HGNC:9675]
circRNA18817	0	0	0	0	0	0	154.843	15.5425	0	42.0693	85.8206	55.686	-inf	down	0.004223	0.142191	yes	chr8	68022036	68038292	+	4	circRNA	ENST00000288368	PREX2	chr8:68019671-68022035|chr8:68038292-68044486	phosphatidylinositol-3,4,5-trisphosphate dependent Rac exchange factor 2 [Source:HGNC Symbol;Acc:HGNC:22950]
circRNA22995	0	0	0	0	0	0	0	124.34	26.4807	84.1387	68.6565	41.7645	-inf	down	0.004227	0.142191	yes	chr1	168104477	168104894	-	1	circRNA	ENST00000271357	GPR161	chr1:168097232-168104476|chr1:168104894-168137389	G protein-coupled receptor 161 [Source:HGNC Symbol;Acc:HGNC:23694]
circRNA2373	13.8891	0	0	0	0	0	0	264.222	52.9614	157.76	102.985	27.843	-5.44675	down	0.004252	0.142707	yes	chr4	185523362	185525171	-	2	circRNA	ENST00000284767	PDLIM3	chr4:185514337-185523361|chr4:185525171-185535341	PDZ and LIM domain 3 [Source:HGNC Symbol;Acc:HGNC:20767]
circRNA7524	0	25.8498	0	27.9181	62.8106	40.0045	0	0	0	0	0	0	inf	up	0.004262	0.142719	yes	chr1	233346442	233362293	+	4	circRNA	ENST00000366623	MAP3K21	chr1:233328833-233346441|chr1:233362293-233372037	mitogen-activated protein kinase kinase kinase 21 [Source:HGNC Symbol;Acc:HGNC:29798]
circRNA1750	41.6672	0	0	0	0	0	681.31	31.085	0	157.76	0	0	-4.38429	down	0.004279	0.142965	yes	chr7	111935540	111945798	-	4	circRNA	ENST00000428084	DOCK4	chr7:111915904-111935539|chr7:111945798-111977131	dedicator of cytokinesis 4 [Source:HGNC Symbol;Acc:HGNC:19192]
circRNA3682	0	12.9249	51.7211	27.9181	0	66.6741	0	0	0	0	0	0	inf	up	0.004301	0.143376	yes	chrX	85303406	85308216	-	6	circRNA	ENST00000262753	POF1B	chrX:85282317-85303405|chrX:85308216-85314431	premature ovarian failure, 1B [Source:HGNC Symbol;Acc:HGNC:13711]
circRNA22486	0	0	0	0	0	0	0	62.1699	66.2018	84.1387	68.6565	41.7645	-inf	down	0.00433	0.144019	yes	chr2	101863821	101870415	+	6	circRNA	ENST00000324219	MAP4K4	chr2:101859864-101863820|chr2:101870415-101873646	mitogen-activated protein kinase kinase kinase kinase 4 [Source:HGNC Symbol;Acc:HGNC:6866]
circRNA1713	138.891	12.9249	12.9303	41.8771	157.026	106.679	30.9686	575.072	476.653	536.384	583.58	417.645	-2.47799	down	0.004417	0.146421	yes	chr7	98190728	98194572	+	2	circRNA	ENST00000297293	LMTK2	chr7:98186998-98190727|chr7:98194572-98203573	lemur tyrosine kinase 2 [Source:HGNC Symbol;Acc:HGNC:17880]
circRNA13090	0	0	0	0	31.4053	0	0	124.34	119.163	73.6214	154.477	97.4504	-4.17948	down	0.004422	0.146421	yes	chr14	33215182	33215587	+	2	circRNA	ENST00000357798	NPAS3	chr14:32939366-33215181|chr14:33215587-33367185	neuronal PAS domain protein 3 [Source:HGNC Symbol;Acc:HGNC:19311]
circRNA6278	0	129.249	181.024	13.959	141.324	93.3438	15.4843	15.5425	39.7211	31.552	51.4924	0	1.86161	up	0.004434	0.14649	yes	chr5	145817894	145826200	-	4	circRNA	ENST00000394450	PRELID2	chr5:145796547-145817893|chr5:145826200-145835176	PRELI domain containing 2 [Source:HGNC Symbol;Acc:HGNC:28306]
circRNA2260	83.3344	323.123	103.442	251.263	141.324	93.3438	247.749	1212.31	648.778	631.04	909.699	640.388	-2.107	down	0.004484	0.147812	yes	chr4	55411614	55417985	+	3	circRNA	ENST00000381334	TMEM165	chr4:55396396-55411613|chr4:55417985-55424537	transmembrane protein 165 [Source:HGNC Symbol;Acc:HGNC:30760]
circRNA18459	0	0	0	0	0	0	46.453	93.2549	13.2404	63.104	34.3283	55.686	-inf	down	0.004508	0.148273	yes	chr1	39322608	39327353	+	5	circRNA	ENST00000567887	MACF1	chr1:39319747-39322607|chr1:39327353-39331202	microtubule-actin crosslinking factor 1 [Source:HGNC Symbol;Acc:HGNC:13664]
circRNA24139	0	0	0	0	0	0	0	0	119.163	94.656	223.134	0	-inf	down	0.00454	0.148796	yes	chr10	77011967	77027891	-	4	circRNA	ENST00000604624	KCNMA1	chr10:76970067-77011966|chr10:77027891-77039527	potassium calcium-activated channel subfamily M alpha 1 [Source:HGNC Symbol;Acc:HGNC:6284]
circRNA18794	0	0	0	0	0	0	15.4843	93.2549	26.4807	63.104	102.985	27.843	-inf	down	0.004544	0.148796	yes	chr8	38836162	38838546	+	2	circRNA	ENST00000519416	TACC1	chr8:38831177-38836161|chr8:38838546-38840223	transforming acidic coiled-coil containing protein 1 [Source:HGNC Symbol;Acc:HGNC:11522]
circRNA13052	0	0	0	0	31.4053	53.3393	46.453	326.392	145.644	42.0693	274.626	83.5289	-3.43842	down	0.00456	0.14899	yes	chr15	51781044	51782828	+	2	circRNA	ENST00000249700	TMOD2	chr15:51777018-51781043|chr15:51782828-51798196	tropomodulin 2 [Source:HGNC Symbol;Acc:HGNC:11872]
circRNA22191	0	0	0	0	0	0	0	139.882	52.9614	21.0347	102.985	41.7645	-inf	down	0.004612	0.150357	yes	chr3	136001059	136003493	+	1	circRNA	ENST00000264977	PPP2R3A	chr3:135965849-136001058|chr3:136003493-136026831	protein phosphatase 2 regulatory subunit B''alpha [Source:HGNC Symbol;Acc:HGNC:9307]
circRNA19663	0	0	0	0	0	0	0	77.7124	52.9614	84.1387	85.8206	27.843	-inf	down	0.00463	0.150612	yes	chr10	18527588	18536196	+	3	circRNA	ENST00000324631	CACNB2	chr10:18518968-18527587|chr10:18536196-18538179	calcium voltage-gated channel auxiliary subunit beta 2 [Source:HGNC Symbol;Acc:HGNC:1402]
circRNA18168	0	0	0	0	0	0	15.4843	62.1699	79.4422	42.0693	85.8206	27.843	-inf	down	0.004699	0.151918	yes	chr2	32478635	32493667	+	10	circRNA	ENST00000421745	BIRC6	chr2:32477583-32478634|chr2:32493667-32499546	baculoviral IAP repeat containing 6 [Source:HGNC Symbol;Acc:HGNC:13516]
circRNA3577	208.336	439.447	142.233	125.631	109.918	146.683	480.014	994.719	767.941	641.558	1081.34	682.153	-1.98725	down	0.004707	0.151918	yes	chr8	102360071	102361626	-	4	circRNA	ENST00000520539	UBR5	chr8:102347092-102360070|chr8:102361626-102412172	ubiquitin protein ligase E3 component n-recognin 5 [Source:HGNC Symbol;Acc:HGNC:16806]
circRNA21143	0	0	0	0	0	0	0	124.34	0	168.277	85.8206	13.9215	-inf	down	0.004714	0.151918	yes	chr7	14613340	14673027	-	4	circRNA	ENST00000399322	DGKB	chr7:14607508-14613339|chr7:14673027-14682552	diacylglycerol kinase beta [Source:HGNC Symbol;Acc:HGNC:2850]
circRNA1383	13.8891	38.7747	51.7211	27.9181	157.026	93.3438	371.624	310.85	397.211	189.312	429.103	278.43	-2.36878	down	0.004725	0.151918	yes	chr18	58934433	58953799	+	4	circRNA	ENST00000336078	ZNF532	chr18:58920633-58934432|chr18:58953799-58979054	zinc finger protein 532 [Source:HGNC Symbol;Acc:HGNC:30940]
circRNA5690	0	155.099	25.8605	27.9181	0	0	0	0	0	0	0	0	inf	up	0.004738	0.151918	yes	chr20	56381433	56386533	-	4	circRNA	ENST00000395914	AURKA	chr20:56373556-56381432|chr20:56386533-56388155	aurora kinase A [Source:HGNC Symbol;Acc:HGNC:11393]
circRNA17757	0	0	0	0	0	0	30.9686	62.1699	39.7211	21.0347	68.6565	83.5289	-inf	down	0.004742	0.151918	yes	chr5	132927121	132934941	-	3	circRNA	ENST00000265343	AFF4	chr5:132904404-132927120|chr5:132934941-132937066	AF4/FMR2 family member 4 [Source:HGNC Symbol;Acc:HGNC:17869]
circRNA7180	0	25.8498	0	13.959	0	0	15.4843	108.797	185.365	84.1387	188.805	83.5289	-4.06462	down	0.004742	0.151918	yes	chr1	12001401	12002103	+	3	circRNA	ENST00000444836	MFN2	chr1:11999095-12001400|chr1:12002103-12003991	mitofusin 2 [Source:HGNC Symbol;Acc:HGNC:16877]
circRNA21424	0	0	0	0	0	0	0	93.2549	26.4807	115.691	102.985	13.9215	-inf	down	0.004772	0.152243	yes	chr6	57207628	57210445	-	2	circRNA	ENST00000468148	RAB23	chr6:57196606-57207627|chr6:57210445-57221725	RAB23, member RAS oncogene family [Source:HGNC Symbol;Acc:HGNC:14263]
circRNA20785	0	0	0	0	0	0	0	139.882	26.4807	21.0347	85.8206	83.5289	-inf	down	0.00478	0.152243	yes	chr19	57925623	57928047	-	1	circRNA	ENST00000595830	ZNF418	chr19:57923289-57925622|chr19:57928047-57930427	zinc finger protein 418 [Source:HGNC Symbol;Acc:HGNC:20647]
circRNA2977	27.7781	12.9249	103.442	13.959	15.7026	40.0045	0	15.5425	0	0	0	0	3.78205	up	0.004783	0.152243	yes	chr1	22078429	22086866	+	4	circRNA	ENST00000400259	CDC42	chr1:22052868-22078428|chr1:22086866-22091427	cell division cycle 42 [Source:HGNC Symbol;Acc:HGNC:1736]
circRNA19566	0	0	0	0	0	0	0	248.68	0	0	360.447	0	-inf	down	0.004808	0.152711	yes	chr11	87067694	87091395	+	3	circRNA	ENST00000340353	TMEM135	chr11:87038186-87067693|chr11:87091395-87236637	transmembrane protein 135 [Source:HGNC Symbol;Acc:HGNC:26167]
circRNA175	13.8891	0	12.9303	0	0	0	46.453	186.51	92.6825	136.725	171.641	0	-4.56316	down	0.004825	0.152923	yes	chr12	6333069	6334244	-	4	circRNA	ENST00000162749	TNFRSF1A	chr12:6330926-6333068|chr12:6334244-6341775	TNF receptor superfamily member 1A [Source:HGNC Symbol;Acc:HGNC:11916]
circRNA8385	0	0	25.8605	0	0	0	154.843	341.935	105.923	0	85.8206	0	-4.73468	down	0.004863	0.153798	yes	chr10	15816835	15847943	-	8	circRNA	ENST00000477891	MINDY3	chr10:15796172-15816834|chr10:15847943-15860205	MINDY lysine 48 deubiquitinase 3 [Source:HGNC Symbol;Acc:HGNC:23578]
circRNA20299	0	0	0	0	0	0	0	31.085	39.7211	42.0693	240.298	41.7645	-inf	down	0.004893	0.154416	yes	chr16	89531904	89544772	+	3	circRNA	ENST00000268704	SPG7	chr16:89530808-89531903|chr16:89544772-89546657	SPG7, paraplegin matrix AAA peptidase subunit [Source:HGNC Symbol;Acc:HGNC:11237]
circRNA16301	0	0	0	0	0	0	30.9686	62.1699	66.2018	52.5867	51.4924	27.843	-inf	down	0.004918	0.154875	yes	chr12	88515534	88545865	-	5	circRNA	ENST00000228280	KITLG	chr12:88507137-88515533|chr12:88545865-88580263	KIT ligand [Source:HGNC Symbol;Acc:HGNC:6343]
circRNA17144	0	0	0	0	0	0	30.9686	93.2549	52.9614	42.0693	51.4924	27.843	-inf	down	0.004929	0.154892	yes	chr19	43581212	43581703	+	2	circRNA	ENST00000612042	PINLYP	chr19:43578706-43581211|chr19:43581703-43581867	phospholipase A2 inhibitor and LY6/PLAUR domain containing [Source:HGNC Symbol;Acc:HGNC:44206]
circRNA21357	0	0	0	0	0	0	0	62.1699	119.163	21.0347	120.149	27.843	-inf	down	0.004978	0.155927	yes	chr6	17507169	17513954	+	3	circRNA	ENST00000229922	CAP2	chr6:17463073-17507168|chr6:17513954-17539268	cyclase associated actin cytoskeleton regulatory protein 2 [Source:HGNC Symbol;Acc:HGNC:20039]
circRNA5718	0	12.9249	38.7908	69.7952	31.4053	40.0045	0	0	0	0	0	13.9215	3.79262	up	0.004983	0.155927	yes	chr21	41489507	41494578	-	2	circRNA	ENST00000332149	TMPRSS2	chr21:41488513-41489506|chr21:41494578-41498118	transmembrane protease, serine 2 [Source:HGNC Symbol;Acc:HGNC:11876]
circRNA138	83.3344	103.399	103.442	0	47.1079	13.3348	30.9686	0	0	31.552	0	0	2.4875	up	0.005056	0.157877	yes	chr13	95983804	95999307	-	5	circRNA	ENST00000376747	UGGT2	chr13:95972671-95983803|chr13:95999307-96013306	UDP-glucose glycoprotein glucosyltransferase 2 [Source:HGNC Symbol;Acc:HGNC:15664]
circRNA16102	0	0	0	0	0	0	46.453	0	52.9614	147.243	102.985	0	-inf	down	0.005131	0.159739	yes	chrX	17103718	17138961	+	4	circRNA	ENST00000357277	REPS2	chrX:17077407-17103717|chrX:17138961-17147412	RALBP1 associated Eps domain containing 2 [Source:HGNC Symbol;Acc:HGNC:9963]
circRNA2589	402.783	426.522	504.281	293.14	314.053	573.398	1006.48	1880.64	1297.56	1125.36	2059.7	1628.81	-1.83961	down	0.005144	0.159739	yes	chr3	196391813	196403019	-	3	circRNA	ENST00000296328	UBXN7	chr3:196372042-196391812|chr3:196403019-196407245	UBX domain protein 7 [Source:HGNC Symbol;Acc:HGNC:29119]
circRNA21589	0	0	0	0	0	0	0	124.34	39.7211	21.0347	85.8206	69.6074	-inf	down	0.005148	0.159739	yes	chr5	55467869	55491114	-	2	circRNA	ENST00000264775	PLPP1	chr5:55441908-55467868|chr5:55491114-55534571	phospholipid phosphatase 1 [Source:HGNC Symbol;Acc:HGNC:9228]
circRNA16764	0	0	0	0	0	0	92.9059	31.085	92.6825	0	154.477	0	-inf	down	0.005162	0.159838	yes	chr17	65743068	65750724	-	2	circRNA	ENST00000535342	CEP112	chr17:65689218-65743067|chr17:65750724-65851803	centrosomal protein 112 [Source:HGNC Symbol;Acc:HGNC:28514]
circRNA8303	0	0	25.8605	55.8361	15.7026	13.3348	0	108.797	158.884	199.829	377.611	208.822	-3.25063	down	0.005206	0.160864	yes	chr11	66639700	66640123	+	1	circRNA	ENST00000421355	RBM14-RBM4	chr11:66617057-66639699|chr11:66640123-66643449	RBM14-RBM4 readthrough [Source:HGNC Symbol;Acc:HGNC:38840]
circRNA21737	0	0	0	0	0	0	0	139.882	0	42.0693	68.6565	111.372	-inf	down	0.005397	0.166419	yes	chr5	179768850	179769089	+	1	circRNA	ENST00000292599	MAML1	chr5:179766741-179768849|chr5:179769089-179771146	mastermind like transcriptional coactivator 1 [Source:HGNC Symbol;Acc:HGNC:13632]
circRNA14289	0	0	0	0	0	26.6697	154.843	155.425	79.4422	0	102.985	69.6074	-4.39808	down	0.005419	0.16675	yes	chr13	46723221	46733998	+	3	circRNA	ENST00000311191	LRCH1	chr13:46712597-46723220|chr13:46733998-46750539	leucine rich repeats and calponin homology domain containing 1 [Source:HGNC Symbol;Acc:HGNC:20309]
circRNA9893	0	0	271.536	13.959	0	0	0	0	0	0	0	0	inf	up	0.005445	0.167202	yes	chr3	28010470	28028603	-	2	circRNA	ENST00000437506	LINC01967	chr3:27997868-28010469|None	long intergenic non-protein coding RNA 1967 [Source:HGNC Symbol;Acc:HGNC:52793]
circRNA18229	0	0	0	0	0	0	15.4843	124.34	13.2404	73.6214	0	97.4504	-inf	down	0.005461	0.167346	yes	chr2	66464109	66548019	+	3	circRNA	ENST00000560281	MEIS1	chr2:66443048-66464108|chr2:66548019-66567452	Meis homeobox 1 [Source:HGNC Symbol;Acc:HGNC:7000]
circRNA18389	0	0	0	0	0	0	15.4843	46.6274	52.9614	94.656	34.3283	41.7645	-inf	down	0.005543	0.169508	yes	chr2	235740963	235750488	+	3	circRNA	ENST00000409457	AGAP1	chr2:235717644-235740962|chr2:235750488-235797758	ArfGAP with GTPase domain, ankyrin repeat and PH domain 1 [Source:HGNC Symbol;Acc:HGNC:16922]
circRNA20325	0	0	0	0	0	0	0	77.7124	39.7211	10.5173	188.805	55.686	-inf	down	0.005563	0.169769	yes	chr15	33841864	33845062	+	3	circRNA	ENST00000634891	RYR3	chr15:33840883-33841863|chr15:33845062-33848290	ryanodine receptor 3 [Source:HGNC Symbol;Acc:HGNC:10485]
circRNA2048	13.8891	0	25.8605	0	0	26.6697	92.9059	139.882	92.6825	105.173	102.985	180.979	-3.42748	down	0.005631	0.17123	yes	chr5	61472681	61473037	+	1	circRNA	ENST00000252744	ZSWIM6	chr5:61332948-61472680|chr5:61473037-61490785	zinc finger SWIM-type containing 6 [Source:HGNC Symbol;Acc:HGNC:29316]
circRNA3261	41.6672	180.949	38.7908	55.8361	109.918	53.3393	77.4216	683.869	357.49	347.072	686.565	417.645	-2.41919	down	0.005634	0.17123	yes	chr1	211353239	211354467	+	2	circRNA	ENST00000462410	TRAF5	chr1:211326673-211353238|chr1:211354467-211356366	TNF receptor associated factor 5 [Source:HGNC Symbol;Acc:HGNC:12035]
circRNA10163	0	0	12.9303	0	0	0	0	217.595	92.6825	63.104	137.313	13.9215	-5.34244	down	0.005646	0.171243	yes	chr2	40139401	40164984	-	3	circRNA	ENST00000406785	SLC8A1	chr2:40115629-40139400|chr2:40164984-40174824	solute carrier family 8 member A1 [Source:HGNC Symbol;Acc:HGNC:11068]
circRNA3841	0	12.9249	12.9303	13.959	94.2159	26.6697	77.4216	279.765	79.4422	126.208	257.462	320.194	-2.82722	down	0.005716	0.173011	yes	chr12	11869424	11869969	+	1	circRNA	ENST00000396373	ETV6	chr12:11853561-11869423|chr12:11869969-11884444	ETS variant 6 [Source:HGNC Symbol;Acc:HGNC:3495]
circRNA2506	83.3344	25.8498	38.7908	27.9181	15.7026	40.0045	170.328	326.392	225.086	178.795	480.596	180.979	-2.75385	down	0.005736	0.173099	yes	chr3	129880309	129880559	-	1	circRNA	ENST00000505924	TMCC1	chr3:129832826-129880308|chr3:129880559-129893493	transmembrane and coiled-coil domain family 1 [Source:HGNC Symbol;Acc:HGNC:29116]
circRNA14222	0	0	0	0	0	40.0045	0	279.765	119.163	136.725	291.79	0	-4.37043	down	0.005752	0.173099	yes	chrX	32545159	32573846	-	4	circRNA	ENST00000619831	DMD	chrX:32518131-32545158|chrX:32573846-32595756	dystrophin [Source:HGNC Symbol;Acc:HGNC:2928]
circRNA580	41.6672	116.324	0	0	15.7026	0	0	341.935	251.567	157.76	240.298	264.508	-2.85429	down	0.005754	0.173099	yes	chr10	72340789	72341170	-	2	circRNA	ENST00000338820	DNAJB12	chr10:72338311-72340788|chr10:72341170-72343365	DnaJ heat shock protein family (Hsp40) member B12 [Source:HGNC Symbol;Acc:HGNC:14891]
circRNA9197	0	0	25.8605	0	0	40.0045	139.359	264.222	172.125	115.691	154.477	0	-3.68286	down	0.005777	0.173187	yes	chr21	39206108	39212707	-	4	circRNA	ENST00000333229	BRWD1	chr21:39202545-39206107|chr21:39212707-39213480	bromodomain and WD repeat domain containing 1 [Source:HGNC Symbol;Acc:HGNC:12760]
circRNA17209	0	0	0	0	0	0	46.453	31.085	92.6825	0	85.8206	55.686	-inf	down	0.005781	0.173187	yes	chr18	56923922	56939393	+	4	circRNA	ENST00000357574	WDR7	chr18:56880165-56923921|chr18:56939393-56962429	WD repeat domain 7 [Source:HGNC Symbol;Acc:HGNC:13490]
circRNA19636	0	0	0	0	0	0	0	77.7124	92.6825	126.208	34.3283	0	-inf	down	0.005792	0.173187	yes	chr10	1084403	1096246	+	4	circRNA	ENST00000358220	WDR37	chr10:1080476-1084402|chr10:1096246-1103601	WD repeat domain 37 [Source:HGNC Symbol;Acc:HGNC:31406]
circRNA3182	41.6672	129.249	142.233	27.9181	141.324	26.6697	108.39	373.019	476.653	525.867	738.057	348.037	-2.33587	down	0.00584	0.17427	yes	chr1	155438327	155439068	-	1	circRNA	ENST00000368346	ASH1L	chr1:155415923-155438326|chr1:155439068-155459796	ASH1 like histone lysine methyltransferase [Source:HGNC Symbol;Acc:HGNC:19088]
circRNA19175	0	0	0	0	0	0	0	77.7124	66.2018	73.6214	85.8206	13.9215	-inf	down	0.005852	0.174277	yes	chr12	26550247	26716242	-	32	circRNA	ENST00000381340	ITPR2	chr12:26495260-26550246|chr12:26716242-26722396	inositol 1,4,5-trisphosphate receptor type 2 [Source:HGNC Symbol;Acc:HGNC:6181]
circRNA1231	27.7781	0	12.9303	0	15.7026	53.3393	15.4843	108.797	185.365	115.691	326.118	292.351	-3.24956	down	0.005898	0.175294	yes	chr14	93293858	93296157	-	2	circRNA	ENST00000334746	BTBD7	chr14:93263993-93293857|chr14:93296157-93332819	BTB domain containing 7 [Source:HGNC Symbol;Acc:HGNC:18269]
circRNA17818	0	0	0	0	0	0	30.9686	31.085	66.2018	115.691	0	41.7645	-inf	down	0.005943	0.176221	yes	chr4	25349492	25364505	+	5	circRNA	ENST00000302874	ZCCHC4	chr4:25345620-25349491|chr4:25364505-25365021	zinc finger CCHC-type containing 4 [Source:HGNC Symbol;Acc:HGNC:22917]
circRNA14334	0	0	0	0	0	13.3348	0	108.797	79.4422	115.691	102.985	55.686	-5.1165	down	0.005953	0.176221	yes	chr12	2486104	2512984	+	4	circRNA	ENST00000335762	CACNA1C	chr12:2457706-2486103|chr12:2512984-2547449	calcium voltage-gated channel subunit alpha1 C [Source:HGNC Symbol;Acc:HGNC:1390]
circRNA5592	0	142.174	0	41.8771	0	13.3348	0	0	0	0	0	0	inf	up	0.005983	0.176755	yes	chr20	35595477	35595754	-	2	circRNA	ENST00000611673	FER1L4	chr20:35576828-35595476|chr20:35595754-35599013	fer-1 like family member 4, pseudogene [Source:HGNC Symbol;Acc:HGNC:15801]
circRNA3316	69.4453	12.9249	103.442	0	109.918	26.6697	247.749	528.444	145.644	315.52	463.431	153.136	-2.52366	down	0.006	0.176904	yes	chr9	5968019	5988545	-	2	circRNA	ENST00000399933	KIAA2026	chr9:5954095-5968018|chr9:5988545-6007194	KIAA2026 [Source:HGNC Symbol;Acc:HGNC:23378]
circRNA24354	0	0	0	0	0	0	0	0	185.365	94.656	102.985	0	-inf	down	0.006016	0.177023	yes	chr17	75042181	75042659	-	2	circRNA	ENST00000301587	ATP5H	chr17:75040163-75042180|chr17:75042659-75046924	ATP synthase, H+ transporting, mitochondrial Fo complex subunit D [Source:HGNC Symbol;Acc:HGNC:845]
circRNA2486	41.6672	25.8498	25.8605	41.8771	157.026	13.3348	139.359	295.307	278.048	241.899	514.924	180.979	-2.43313	down	0.006036	0.17726	yes	chr3	119500695	119504021	+	3	circRNA	ENST00000494664	TIMMDC1	chr3:119498927-119500694|chr3:119504021-119513640	translocase of inner mitochondrial membrane domain containing 1 [Source:HGNC Symbol;Acc:HGNC:1321]
circRNA13481	0	0	0	0	15.7026	26.6697	61.9373	93.2549	119.163	52.5867	120.149	125.293	-3.75579	down	0.006078	0.17814	yes	chr6	116698704	116705160	+	3	circRNA	ENST00000368564	KPNA5	chr6:116692392-116698703|chr6:116705160-116716218	karyopherin subunit alpha 5 [Source:HGNC Symbol;Acc:HGNC:6398]
circRNA8043	0	0	12.9303	0	15.7026	40.0045	61.9373	217.595	66.2018	94.656	326.118	69.6074	-3.60664	down	0.006133	0.179396	yes	chr13	30227412	30241086	-	5	circRNA	ENST00000380615	KATNAL1	chr13:30210442-30227411|chr13:30241086-30255446	katanin catalytic subunit A1 like 1 [Source:HGNC Symbol;Acc:HGNC:28361]
circRNA1355	41.6672	491.146	129.303	13.959	141.324	106.679	139.359	714.954	714.979	504.832	806.714	501.174	-1.8718	down	0.006151	0.179568	yes	chr18	32111754	32113860	+	2	circRNA	ENST00000261593	RNF138	chr18:32092886-32111753|chr18:32113860-32123517	ring finger protein 138 [Source:HGNC Symbol;Acc:HGNC:17765]
circRNA22434	0	0	0	0	0	0	0	62.1699	39.7211	31.552	137.313	55.686	-inf	down	0.006216	0.181108	yes	chr2	63433745	63571626	-	9	circRNA	ENST00000417238	WDPCP	chr2:63404657-63433744|chr2:63571626-63588196	WD repeat containing planar cell polarity effector [Source:HGNC Symbol;Acc:HGNC:28027]
circRNA29	13.8891	0	0	13.959	0	13.3348	0	139.882	105.923	189.312	223.134	69.6074	-4.14354	down	0.006317	0.183689	yes	chrX	53561756	53562929	-	3	circRNA	ENST00000612484	HUWE1	chrX:53560416-53561755|chrX:53562929-53563745	HECT, UBA and WWE domain containing 1, E3 ubiquitin protein ligase [Source:HGNC Symbol;Acc:HGNC:30892]
circRNA10725	0	0	12.9303	41.8771	0	13.3348	15.4843	295.307	119.163	105.173	137.313	125.293	-3.54929	down	0.006356	0.184461	yes	chr9	33886881	33900271	+	2	circRNA	ENST00000263228	UBE2R2	chr9:33817934-33886880|chr9:33900271-33911963	ubiquitin conjugating enzyme E2 R2 [Source:HGNC Symbol;Acc:HGNC:19907]
circRNA10919	0	0	38.7908	55.8361	62.8106	0	0	0	0	0	0	0	inf	up	0.006378	0.184737	yes	chr8	140818277	140864399	-	6	circRNA	ENST00000522684	PTK2	chr8:140803650-140818276|chr8:140864399-140879470	protein tyrosine kinase 2 [Source:HGNC Symbol;Acc:HGNC:9611]
circRNA20596	0	0	0	0	0	0	0	124.34	26.4807	31.552	51.4924	83.5289	-inf	down	0.006413	0.184869	yes	chr14	73880055	73898262	+	9	circRNA	ENST00000556551	AC005520.1	chr14:73877168-73880054|chr14:73898262-73903959	NA
circRNA3411	69.4453	0	12.9303	13.959	15.7026	26.6697	0	0	0	0	0	0	inf	up	0.006421	0.184869	yes	chr9	112268049	112297916	-	3	circRNA	ENST00000458258	PTBP3	chr9:112262599-112268048|chr9:112297916-112332783	polypyrimidine tract binding protein 3 [Source:HGNC Symbol;Acc:HGNC:10253]
circRNA4439	0	25.8498	0	27.9181	15.7026	13.3348	30.9686	202.052	132.404	199.829	154.477	97.4504	-3.30286	down	0.006424	0.184869	yes	chr10	101672915	101676436	-	3	circRNA	ENST00000331272	FBXW4	chr10:101667980-101672914|chr10:101676436-101694380	F-box and WD repeat domain containing 4 [Source:HGNC Symbol;Acc:HGNC:10847]
circRNA16269	0	0	0	0	0	0	15.4843	124.34	26.4807	63.104	102.985	0	-inf	down	0.006442	0.184869	yes	chr12	53021806	53028188	+	4	circRNA	ENST00000262056	EIF4B	chr12:53020026-53021805|chr12:53028188-53033805	eukaryotic translation initiation factor 4B [Source:HGNC Symbol;Acc:HGNC:3285]
circRNA18774	0	0	0	0	0	0	46.453	62.1699	52.9614	31.552	51.4924	27.843	-inf	down	0.006445	0.184869	yes	chr8	13098399	13100770	-	2	circRNA	ENST00000276297	DLC1	chr8:13095245-13098398|chr8:13100770-13102789	DLC1 Rho GTPase activating protein [Source:HGNC Symbol;Acc:HGNC:2897]
circRNA22460	0	0	0	0	0	0	0	62.1699	26.4807	63.104	154.477	27.843	-inf	down	0.006473	0.185313	yes	chr2	73557220	73559142	+	2	circRNA	ENST00000484298	ALMS1	chr2:73550437-73557219|chr2:73559142-73572261	ALMS1, centrosome and basal body associated protein [Source:HGNC Symbol;Acc:HGNC:428]
circRNA16068	0	0	0	0	0	13.3348	0	139.882	132.404	73.6214	85.8206	41.7645	-5.15007	down	0.006514	0.186127	yes	chr8	115587001	115623758	-	4	circRNA	ENST00000395715	TRPS1	chr8:115418452-115587000|chr8:115623758-115668544	transcriptional repressor GATA binding 1 [Source:HGNC Symbol;Acc:HGNC:12340]
circRNA21361	0	0	0	0	0	0	0	233.137	0	42.0693	171.641	0	-inf	down	0.006531	0.186253	yes	chr6	17665239	17669028	-	2	circRNA	ENST00000537253	NUP153	chr6:17662070-17665238|chr6:17669028-17669292	nucleoporin 153 [Source:HGNC Symbol;Acc:HGNC:8062]
circRNA17018	0	0	0	0	0	0	77.4216	108.797	39.7211	31.552	17.1641	13.9215	-inf	down	0.006549	0.186407	yes	chr14	32117140	32152528	+	4	circRNA	ENST00000539826	ARHGAP5	chr14:32094386-32117139|chr14:32152528-32154620	Rho GTPase activating protein 5 [Source:HGNC Symbol;Acc:HGNC:675]
circRNA21480	0	0	0	0	0	0	0	155.425	39.7211	94.656	51.4924	0	-inf	down	0.006581	0.186959	yes	chr6	110298922	110322872	-	3	circRNA	ENST00000338882	METTL24	chr6:110246260-110298921|chr6:110322872-110357954	methyltransferase like 24 [Source:HGNC Symbol;Acc:HGNC:21566]
circRNA18523	0	0	0	0	0	0	15.4843	77.7124	66.2018	10.5173	68.6565	55.686	-inf	down	0.006665	0.188791	yes	chr1	96769703	96770851	+	2	circRNA	ENST00000482253	PTBP2	chr1:96723594-96769702|chr1:96770851-96777584	polypyrimidine tract binding protein 2 [Source:HGNC Symbol;Acc:HGNC:17662]
circRNA826	27.7781	51.6996	90.5119	55.8361	15.7026	93.3438	92.9059	512.902	410.451	147.243	429.103	417.645	-2.58569	down	0.006671	0.188791	yes	chr16	3850297	3851009	-	1	circRNA	ENST00000262367	CREBBP	chr16:3810779-3850296|chr16:3851009-3879831	CREB binding protein [Source:HGNC Symbol;Acc:HGNC:2348]
circRNA18710	0	0	0	0	0	0	61.9373	31.085	52.9614	10.5173	51.4924	69.6074	-inf	down	0.006685	0.188826	yes	chr9	86303086	86304947	-	2	circRNA	ENST00000277141	ZCCHC6	chr9:86301601-86303085|chr9:86304947-86305191	zinc finger CCHC-type containing 6 [Source:HGNC Symbol;Acc:HGNC:25817]
circRNA6793	0	64.6245	0	69.7952	94.2159	13.3348	154.843	326.392	66.2018	189.312	446.267	208.822	-2.52409	down	0.006703	0.188974	yes	chr3	195688533	195689438	+	2	circRNA	ENST00000600527	LINC00969	chr3:195683865-195688532|chr3:195689438-195696360	long intergenic non-protein coding RNA 969 [Source:HGNC Symbol;Acc:HGNC:48729]
circRNA16318	0	0	0	0	0	0	30.9686	124.34	0	84.1387	102.985	0	-inf	down	0.006808	0.191205	yes	chr12	99244342	99246864	-	2	circRNA	ENST00000547776	ANKS1B	chr12:99154395-99244341|chr12:99246864-99399630	ankyrin repeat and sterile alpha motif domain containing 1B [Source:HGNC Symbol;Acc:HGNC:24600]
circRNA18149	0	0	0	0	0	0	46.453	93.2549	52.9614	0	85.8206	27.843	-inf	down	0.006808	0.191205	yes	chr2	20307978	20327378	-	5	circRNA	ENST00000361078	PUM2	chr2:20297678-20307977|chr2:20327378-20350596	pumilio RNA binding family member 2 [Source:HGNC Symbol;Acc:HGNC:14958]
circRNA17943	0	0	0	0	0	0	46.453	93.2549	39.7211	21.0347	51.4924	27.843	-inf	down	0.006872	0.192637	yes	chr4	185626832	185649656	-	4	circRNA	ENST00000418609	SORBS2	chr4:185624494-185626831|chr4:185649656-185652661	sorbin and SH3 domain containing 2 [Source:HGNC Symbol;Acc:HGNC:24098]
circRNA12873	0	0	0	0	62.8106	13.3348	0	217.595	92.6825	115.691	171.641	139.215	-3.27449	down	0.006922	0.192996	yes	chr17	8238031	8238629	-	2	circRNA	ENST00000315684	CTC1	chr17:8237519-8238030|chr17:8238629-8242984	CST telomere replication complex component 1 [Source:HGNC Symbol;Acc:HGNC:26169]
circRNA14029	0	0	0	0	31.4053	0	61.9373	124.34	39.7211	63.104	85.8206	111.372	-3.95275	down	0.00694	0.192996	yes	chr1	201817088	201817285	+	1	circRNA	ENST00000367302	NAV1	chr1:201813258-201817087|chr1:201817285-201819836	neuron navigator 1 [Source:HGNC Symbol;Acc:HGNC:15989]
circRNA23059	0	0	0	0	0	0	0	93.2549	92.6825	10.5173	102.985	27.843	-inf	down	0.006941	0.192996	yes	chr1	203723881	203727571	+	2	circRNA	ENST00000357681	ATP2B4	chr1:203722689-203723880|chr1:203727571-203739545	ATPase plasma membrane Ca2+ transporting 4 [Source:HGNC Symbol;Acc:HGNC:817]
circRNA84	13.8891	12.9249	0	0	0	0	108.39	62.1699	52.9614	84.1387	137.313	55.686	-4.22277	down	0.006944	0.192996	yes	chr13	28197185	28220378	+	2	circRNA	ENST00000503791	PAN3	chr13:28177935-28197184|chr13:28220378-28256291	PAN3 poly(A) specific ribonuclease subunit [Source:HGNC Symbol;Acc:HGNC:29991]
circRNA2657	27.7781	0	12.9303	0	15.7026	13.3348	309.686	233.137	66.2018	42.0693	51.4924	111.372	-3.54478	down	0.00695	0.192996	yes	chr2	43742741	43745963	+	3	circRNA	ENST00000282406	PLEKHH2	chr2:43741043-43742740|chr2:43745963-43753618	pleckstrin homology, MyTH4 and FERM domain containing H2 [Source:HGNC Symbol;Acc:HGNC:30506]
circRNA3249	13.8891	0	0	0	0	0	0	93.2549	66.2018	42.0693	154.477	153.136	-5.19604	down	0.007018	0.194322	yes	chr1	201485283	201490344	-	3	circRNA	ENST00000367306	CSRP1	chr1:201484789-201485282|chr1:201490344-201496191	cysteine and glycine rich protein 1 [Source:HGNC Symbol;Acc:HGNC:2469]
circRNA16300	0	0	0	0	0	0	77.4216	31.085	26.4807	31.552	85.8206	27.843	-inf	down	0.007024	0.194322	yes	chr12	88505159	88545865	-	8	circRNA	ENST00000228280	KITLG	chr12:88497181-88505158|chr12:88545865-88580263	KIT ligand [Source:HGNC Symbol;Acc:HGNC:6343]
circRNA17238	0	0	0	0	0	0	15.4843	46.6274	39.7211	73.6214	51.4924	41.7645	-inf	down	0.007123	0.196693	yes	chr22	28296198	28297852	-	2	circRNA	ENST00000612946	TTC28	chr22:28163599-28296197|chr22:28297852-28306495	tetratricopeptide repeat domain 28 [Source:HGNC Symbol;Acc:HGNC:29179]
circRNA3118	83.3344	51.6996	90.5119	55.8361	15.7026	93.3438	108.39	528.444	304.528	262.933	600.744	459.409	-2.53603	down	0.007213	0.198807	yes	chr1	92333391	92380873	+	4	circRNA	ENST00000610020	RPAP2	chr1:92324375-92333390|chr1:92380873-92387010	RNA polymerase II associated protein 2 [Source:HGNC Symbol;Acc:HGNC:25791]
circRNA17071	0	0	0	0	0	0	92.9059	62.1699	66.2018	0	0	69.6074	-inf	down	0.007229	0.198878	yes	chr14	76166663	76195972	+	8	circRNA	ENST00000554375	GPATCH2L	chr14:76155025-76166662|chr14:76195972-76201690	G-patch domain containing 2 like [Source:HGNC Symbol;Acc:HGNC:20210]
circRNA7086	0	116.324	12.9303	41.8771	94.2159	40.0045	0	31.085	0	31.552	0	0	2.28539	up	0.007468	0.205072	yes	chr2	199380364	199433514	-	3	circRNA	ENST00000417098	SATB2	chr2:199368707-199380363|chr2:199433514-199455868	SATB homeobox 2 [Source:HGNC Symbol;Acc:HGNC:21637]
circRNA7300	0	12.9249	12.9303	41.8771	47.1079	13.3348	0	0	0	0	0	0	inf	up	0.007505	0.205706	yes	chr1	59900965	59916100	-	7	circRNA	ENST00000371204	CYP2J2	chr1:59893829-59900964|chr1:59916100-59926536	cytochrome P450 family 2 subfamily J member 2 [Source:HGNC Symbol;Acc:HGNC:2634]
ciRNA459	0	0	0	0	0	0	0	248.68	119.163	10.5173	17.1641	0	-inf	down	0.007647	0.209211	yes	chr9	35684551	35685063	-	1	ciRNA	ENST00000378292	TPM2	chr9:35684550-35685063	tropomyosin 2 [Source:HGNC Symbol;Acc:HGNC:12011]
circRNA8513	0	0	64.6514	41.8771	0	40.0045	0	0	0	0	0	0	inf	up	0.007705	0.210158	yes	chr17	319420	327579	-	3	circRNA	ENST00000618002	RPH3AL	chr17:281854-319419|chr17:327579-352711	rabphilin 3A like (without C2 domains) [Source:HGNC Symbol;Acc:HGNC:10296]
circRNA1185	41.6672	90.4743	38.7908	27.9181	47.1079	13.3348	0	31.085	13.2404	0	17.1641	0	2.07617	up	0.00771	0.210158	yes	chr14	65615978	65629606	+	3	circRNA	ENST00000360689	FUT8	chr14:65561766-65615977|chr14:65629606-65669242	fucosyltransferase 8 [Source:HGNC Symbol;Acc:HGNC:4019]
circRNA17697	0	0	0	0	0	0	61.9373	0	13.2404	63.104	17.1641	139.215	-inf	down	0.007813	0.212574	yes	chr5	64325186	64330406	+	2	circRNA	ENST00000389100	RNF180	chr5:64217396-64325185|chr5:64330406-64369614	ring finger protein 180 [Source:HGNC Symbol;Acc:HGNC:27752]
circRNA19140	0	0	0	0	0	0	0	31.085	26.4807	73.6214	137.313	41.7645	-inf	down	0.007852	0.213243	yes	chr12	2486104	2493386	+	2	circRNA	ENST00000335762	CACNA1C	chr12:2457706-2486103|chr12:2493386-2504841	calcium voltage-gated channel subunit alpha1 C [Source:HGNC Symbol;Acc:HGNC:1390]
circRNA5781	0	38.7747	51.7211	83.7542	109.918	80.009	232.265	295.307	225.086	294.485	429.103	348.037	-2.32462	down	0.007887	0.213627	yes	chr7	35667434	35673278	-	3	circRNA	ENST00000396081	HERPUD2	chr7:35638472-35667433|chr7:35673278-35694183	HERPUD family member 2 [Source:HGNC Symbol;Acc:HGNC:21915]
circRNA3024	27.7781	0	0	41.8771	15.7026	13.3348	30.9686	217.595	145.644	157.76	240.298	125.293	-3.21679	down	0.007895	0.213627	yes	chr1	36361221	36362656	-	2	circRNA	ENST00000473733	STK40	chr1:36358822-36361220|None	serine/threonine kinase 40 [Source:HGNC Symbol;Acc:HGNC:21373]
circRNA197	13.8891	0	0	0	0	0	30.9686	155.425	66.2018	73.6214	51.4924	41.7645	-4.91656	down	0.008017	0.216299	yes	chr12	26055236	26067713	+	3	circRNA	ENST00000381352	RASSF8	chr12:25995130-26055235|chr12:26067713-26079032	Ras association domain family member 8 [Source:HGNC Symbol;Acc:HGNC:13232]
circRNA453	13.8891	12.9249	0	0	15.7026	26.6697	30.9686	295.307	185.365	157.76	34.3283	125.293	-3.58285	down	0.008023	0.216299	yes	chr11	94795011	94800311	+	2	circRNA	ENST00000433060	AMOTL1	chr11:94768560-94795010|chr11:94800311-94821529	angiomotin like 1 [Source:HGNC Symbol;Acc:HGNC:17811]
circRNA508	27.7781	51.6996	38.7908	27.9181	31.4053	0	15.4843	0	0	0	0	0	3.51969	up	0.008076	0.217117	yes	chr10	11851997	11852215	+	1	circRNA	ENST00000474155	PROSER2	chr10:11823470-11851996|chr10:11852215-11862911	proline and serine rich 2 [Source:HGNC Symbol;Acc:HGNC:23728]
circRNA15462	0	0	0	0	0	13.3348	0	62.1699	79.4422	84.1387	85.8206	97.4504	-4.93891	down	0.008094	0.217117	yes	chr4	168890922	168903906	+	4	circRNA	ENST00000261509	PALLD	chr4:168711923-168890921|chr4:168903906-168913926	palladin, cytoskeletal associated protein [Source:HGNC Symbol;Acc:HGNC:17068]
circRNA18548	0	0	0	0	0	0	46.453	31.085	66.2018	31.552	34.3283	41.7645	-inf	down	0.008108	0.217117	yes	chr1	151024611	151027327	+	3	circRNA	ENST00000467771	PRUNE1	chr1:151018669-151024610|chr1:151027327-151028785	prune exopolyphosphatase 1 [Source:HGNC Symbol;Acc:HGNC:13420]
circRNA15188	0	0	0	0	0	26.6697	92.9059	93.2549	39.7211	52.5867	85.8206	83.5289	-4.06964	down	0.008112	0.217117	yes	chr7	152145165	152149152	-	3	circRNA	ENST00000360104	KMT2C	chr7:152144881-152145164|chr7:152149152-152150899	lysine methyltransferase 2C [Source:HGNC Symbol;Acc:HGNC:13726]
circRNA19327	0	0	0	0	0	0	0	77.7124	52.9614	63.104	85.8206	13.9215	-inf	down	0.008134	0.217313	yes	chr12	109171805	109174230	+	3	circRNA	ENST00000338432	ACACB	chr12:109168034-109171804|chr12:109174230-109175930	acetyl-CoA carboxylase beta [Source:HGNC Symbol;Acc:HGNC:85]
circRNA13107	0	0	0	0	78.5132	0	0	155.425	79.4422	115.691	205.97	83.5289	-3.02719	down	0.008172	0.217935	yes	chr14	58223622	58223856	+	2	circRNA	ENST00000545307	ACTR10	chr14:58219729-58223621|chr14:58223856-58230398	actin related protein 10 homolog [Source:HGNC Symbol;Acc:HGNC:17372]
circRNA14621	0	0	0	0	0	13.3348	0	93.2549	145.644	0	102.985	125.293	-5.1307	down	0.008242	0.219406	yes	chr17	9940126	9946983	-	3	circRNA	ENST00000437099	GAS7	chr17:9934244-9940125|chr17:9946983-9959201	growth arrest specific 7 [Source:HGNC Symbol;Acc:HGNC:4169]
circRNA3358	83.3344	38.7747	77.5816	0	0	26.6697	46.453	404.104	185.365	147.243	360.447	334.116	-2.70669	down	0.008416	0.223636	yes	chr9	83677727	83678599	-	2	circRNA	ENST00000376395	UBQLN1	chr9:83669327-83677726|chr9:83678599-83679774	ubiquilin 1 [Source:HGNC Symbol;Acc:HGNC:12508]
circRNA10295	0	0	12.9303	0	31.4053	0	30.9686	93.2549	119.163	42.0693	102.985	194.901	-3.71781	down	0.008437	0.223792	yes	chr2	159169250	159170805	+	2	circRNA	ENST00000263635	TANC1	chr2:159163546-159169249|chr2:159170805-159172120	tetratricopeptide repeat, ankyrin repeat and coiled-coil containing 1 [Source:HGNC Symbol;Acc:HGNC:29364]
circRNA1138	83.3344	0	0	0	15.7026	40.0045	92.9059	248.68	158.884	94.656	171.641	153.136	-2.72597	down	0.008471	0.224292	yes	chr14	30935163	30956242	-	6	circRNA	ENST00000355683	STRN3	chr14:30913657-30935162|chr14:30956242-31025903	striatin 3 [Source:HGNC Symbol;Acc:HGNC:15720]
circRNA19691	0	0	0	0	0	0	0	93.2549	26.4807	42.0693	68.6565	55.686	-inf	down	0.008498	0.224605	yes	chr10	34359147	34384254	-	6	circRNA	ENST00000545260	PARD3	chr10:34348115-34359146|chr10:34384254-34399329	par-3 family cell polarity regulator [Source:HGNC Symbol;Acc:HGNC:16051]
circRNA7693	0	90.4743	103.442	13.959	47.1079	13.3348	0	0	26.4807	0	0	13.9215	2.73144	up	0.008561	0.225867	yes	chr9	112262435	112297916	-	4	circRNA	ENST00000458258	PTBP3	chr9:112252788-112262434|chr9:112297916-112332783	polypyrimidine tract binding protein 3 [Source:HGNC Symbol;Acc:HGNC:10253]
circRNA17913	0	0	0	0	0	0	15.4843	62.1699	79.4422	10.5173	120.149	13.9215	-inf	down	0.008632	0.227132	yes	chr4	143437999	143440382	+	3	circRNA	ENST00000262995	GAB1	chr4:143433716-143437998|chr4:143440382-143457679	GRB2 associated binding protein 1 [Source:HGNC Symbol;Acc:HGNC:4066]
circRNA1344	13.8891	12.9249	25.8605	0	15.7026	53.3393	108.39	264.222	172.125	84.1387	137.313	167.058	-2.93873	down	0.008654	0.227132	yes	chr18	13681605	13682105	-	1	circRNA	ENST00000322247	FAM210A	chr18:13671973-13681604|chr18:13682105-13697546	family with sequence similarity 210 member A [Source:HGNC Symbol;Acc:HGNC:28346]
circRNA14956	0	0	0	0	0	13.3348	92.9059	46.6274	66.2018	31.552	51.4924	83.5289	-4.80323	down	0.008655	0.227132	yes	chr18	8076455	8088851	+	3	circRNA	ENST00000580170	PTPRM	chr18:8069994-8076454|chr18:8088851-8113485	protein tyrosine phosphatase, receptor type M [Source:HGNC Symbol;Acc:HGNC:9675]
circRNA22888	0	0	0	0	0	0	0	15.5425	66.2018	52.5867	34.3283	111.372	-inf	down	0.008705	0.227862	yes	chr1	74236102	74271708	+	4	circRNA	ENST00000557284	FPGT-TNNI3K	chr1:74201410-74236101|chr1:74271708-74331449	FPGT-TNNI3K readthrough [Source:HGNC Symbol;Acc:HGNC:42952]
circRNA2254	41.6672	64.6245	0	0	62.8106	26.6697	92.9059	170.967	185.365	220.864	343.283	222.744	-2.65858	down	0.008715	0.227862	yes	chr4	51863437	51899378	+	6	circRNA	ENST00000509376	DCUN1D4	chr4:51843267-51863436|chr4:51899378-51913289	defective in cullin neddylation 1 domain containing 4 [Source:HGNC Symbol;Acc:HGNC:28998]
circRNA3342	13.8891	51.6996	38.7908	111.672	31.4053	0	0	0	0	21.0347	0	13.9215	2.82356	up	0.008729	0.227862	yes	chr9	33996223	34017189	-	3	circRNA	ENST00000379238	UBAP2	chr9:33989126-33996222|chr9:34017189-34048824	ubiquitin associated protein 2 [Source:HGNC Symbol;Acc:HGNC:14185]
circRNA3241	13.8891	0	0	0	0	13.3348	0	139.882	185.365	42.0693	85.8206	125.293	-4.4092	down	0.008799	0.229285	yes	chr1	186893011	186911389	+	4	circRNA	ENST00000367466	PLA2G4A	chr1:186870516-186893010|chr1:186911389-186932762	phospholipase A2 group IVA [Source:HGNC Symbol;Acc:HGNC:9035]
circRNA8970	0	0	25.8605	0	0	0	77.4216	0	92.6825	94.656	51.4924	153.136	-4.18196	down	0.008823	0.229507	yes	chr19	34215124	34215661	+	2	circRNA	ENST00000540746	LSM14A	chr19:34196763-34215123|chr19:34215661-34219390	LSM14A, mRNA processing body assembly factor [Source:HGNC Symbol;Acc:HGNC:24489]
circRNA606	13.8891	38.7747	51.7211	69.7952	15.7026	93.3438	46.453	481.817	238.326	147.243	635.073	348.037	-2.74365	down	0.008899	0.231077	yes	chr10	93381219	93389154	-	3	circRNA	ENST00000358334	MYOF	chr10:93379987-93381218|chr10:93389154-93396141	myoferlin [Source:HGNC Symbol;Acc:HGNC:3656]
circRNA1583	97.2234	51.6996	64.6514	41.8771	0	66.6741	46.453	0	13.2404	10.5173	17.1641	0	1.88233	up	0.008922	0.231269	yes	chr7	8218305	8236005	-	5	circRNA	ENST00000402384	ICA1	chr7:8158652-8218304|chr7:8236005-8262093	islet cell autoantigen 1 [Source:HGNC Symbol;Acc:HGNC:5343]
circRNA2082	111.113	168.024	103.442	13.959	62.8106	40.0045	77.4216	357.477	542.855	283.968	532.088	821.368	-2.38878	down	0.009155	0.236894	yes	chr5	79439010	79457018	-	4	circRNA	ENST00000334082	HOMER1	chr5:79402055-79439009|chr5:79457018-79512769	homer scaffolding protein 1 [Source:HGNC Symbol;Acc:HGNC:17512]
circRNA2703	27.7781	64.6245	12.9303	13.959	62.8106	106.679	170.328	481.817	198.605	199.829	308.954	208.822	-2.4412	down	0.009224	0.238263	yes	chr2	68490190	68545312	+	7	circRNA	ENST00000303795	APLF	chr2:68467827-68490189|chr2:68545312-68567340	aprataxin and PNKP like factor [Source:HGNC Symbol;Acc:HGNC:28724]
circRNA16984	0	0	0	0	0	0	15.4843	77.7124	39.7211	31.552	34.3283	55.686	-inf	down	0.009304	0.23991	yes	chr15	83923904	83970637	+	4	circRNA	ENST00000286744	ADAMTSL3	chr15:83913378-83923903|chr15:83970637-83982272	ADAMTS like 3 [Source:HGNC Symbol;Acc:HGNC:14633]
circRNA1031	222.225	116.324	116.372	153.549	125.621	80.009	665.826	854.836	357.49	357.589	926.863	417.645	-2.13678	down	0.009334	0.240157	yes	chr15	62007308	62013992	-	6	circRNA	ENST00000249837	VPS13C	chr15:62000626-62007307|chr15:62013992-62020478	vacuolar protein sorting 13 homolog C [Source:HGNC Symbol;Acc:HGNC:23594]
circRNA23390	0	0	0	0	0	0	0	46.6274	39.7211	21.0347	137.313	55.686	-inf	down	0.009346	0.240157	yes	chr8	30175085	30180630	+	4	circRNA	ENST00000221114	DCTN6	chr8:30164175-30175084|chr8:30180630-30183074	dynactin subunit 6 [Source:HGNC Symbol;Acc:HGNC:16964]
circRNA1293	41.6672	0	0	0	0	0	61.9373	170.967	198.605	0	257.462	0	-4.04746	down	0.009669	0.24775	yes	chr19	33113767	33114419	+	2	circRNA	ENST00000170564	GPATCH1	chr19:33112613-33113766|chr19:33114419-33117824	G-patch domain containing 1 [Source:HGNC Symbol;Acc:HGNC:24658]
circRNA17997	0	0	0	0	0	0	30.9686	0	26.4807	21.0347	188.805	55.686	-inf	down	0.009675	0.24775	yes	chr3	47918719	47921878	-	2	circRNA	ENST00000395734	MAP4	chr3:47917174-47918718|chr3:47921878-47928227	microtubule associated protein 4 [Source:HGNC Symbol;Acc:HGNC:6862]
circRNA9505	0	0	38.7908	69.7952	31.4053	0	0	0	0	0	0	0	inf	up	0.009704	0.24784	yes	chr6	136694140	136720589	-	6	circRNA	ENST00000359015	MAP3K5	chr6:136669395-136694139|chr6:136720589-136791709	mitogen-activated protein kinase kinase kinase 5 [Source:HGNC Symbol;Acc:HGNC:6857]
circRNA22290	0	0	0	0	0	0	0	46.6274	79.4422	73.6214	34.3283	27.843	-inf	down	0.009712	0.24784	yes	chr2	3421881	3457693	+	4	circRNA	ENST00000382110	TRAPPC12	chr2:3401893-3421880|chr2:3457693-3460262	trafficking protein particle complex 12 [Source:HGNC Symbol;Acc:HGNC:24284]
circRNA349	13.8891	0	0	0	0	0	0	170.967	105.923	63.104	85.8206	41.7645	-5.07319	down	0.009749	0.248356	yes	chr11	30495296	30536175	-	2	circRNA	ENST00000448418	MPPED2	chr11:30417633-30495295|chr11:30536175-30580245	metallophosphoesterase domain containing 2 [Source:HGNC Symbol;Acc:HGNC:1180]
circRNA3867	0	25.8498	0	0	0	0	0	139.882	119.163	42.0693	85.8206	83.5289	-4.18586	down	0.009809	0.249455	yes	chr12	26996742	26999676	-	2	circRNA	ENST00000343028	TM7SF3	chr12:26995408-26996741|chr12:26999676-27003235	transmembrane 7 superfamily member 3 [Source:HGNC Symbol;Acc:HGNC:23049]
circRNA22511	0	0	0	0	0	0	0	108.797	0	42.0693	85.8206	69.6074	-inf	down	0.00983	0.249561	yes	chr2	127989564	127989866	-	1	circRNA	ENST00000357702	SAP130	chr2:127986962-127989563|chr2:127989866-127993186	Sin3A associated protein 130 [Source:HGNC Symbol;Acc:HGNC:29813]
circRNA20148	0	0	0	0	0	0	0	77.7124	52.9614	21.0347	85.8206	41.7645	-inf	down	0.009906	0.250833	yes	chr16	15720839	15721634	-	2	circRNA	ENST00000396324	MYH11	chr16:15720312-15720838|chr16:15721634-15724160	myosin heavy chain 11 [Source:HGNC Symbol;Acc:HGNC:7569]
circRNA11302	0	0	0	13.959	0	0	0	155.425	92.6825	31.552	102.985	69.6074	-5.01785	down	0.009914	0.250833	yes	chr16	15753394	15756514	-	2	circRNA	ENST00000396324	MYH11	chr16:15750331-15753393|chr16:15756514-15757826	myosin heavy chain 11 [Source:HGNC Symbol;Acc:HGNC:7569]
circRNA2346	55.5563	51.6996	25.8605	111.672	94.2159	0	108.39	543.987	251.567	210.347	514.924	208.822	-2.43879	down	0.009932	0.250859	yes	chr4	145845956	145849561	-	2	circRNA	ENST00000508784	ZNF827	chr4:145823525-145845955|chr4:145849561-145870244	zinc finger protein 827 [Source:HGNC Symbol;Acc:HGNC:27193]
circRNA21919	0	0	0	0	0	0	0	93.2549	52.9614	63.104	85.8206	0	-inf	down	0.009963	0.251214	yes	chr4	147906638	147946704	+	5	circRNA	ENST00000336498	ARHGAP10	chr4:147881932-147906637|chr4:147946704-147955315	Rho GTPase activating protein 10 [Source:HGNC Symbol;Acc:HGNC:26099]
circRNA1619	41.6672	12.9249	51.7211	0	31.4053	26.6697	123.875	264.222	92.6825	178.795	497.76	111.372	-2.94818	down	0.010007	0.251894	yes	chr7	33146242	33177591	+	4	circRNA	ENST00000242067	BBS9	chr7:33130041-33146241|chr7:33177591-33257235	Bardet-Biedl syndrome 9 [Source:HGNC Symbol;Acc:HGNC:30000]
circRNA16960	0	0	0	0	0	0	30.9686	15.5425	66.2018	52.5867	51.4924	27.843	-inf	down	0.010034	0.251993	yes	chr15	65729072	65756472	-	9	circRNA	ENST00000443035	DENND4A	chr15:65722948-65729071|chr15:65756472-65761359	DENN domain containing 4A [Source:HGNC Symbol;Acc:HGNC:24321]
circRNA23517	0	0	0	0	0	0	0	62.1699	26.4807	94.656	85.8206	13.9215	-inf	down	0.010045	0.251993	yes	chr8	141185139	141190417	+	3	circRNA	ENST00000262585	DENND3	chr8:141180854-141185138|chr8:141190417-141192330	DENN domain containing 3 [Source:HGNC Symbol;Acc:HGNC:29134]
circRNA2894	152.78	90.4743	38.7908	13.959	94.2159	13.3348	154.843	404.104	238.326	283.968	549.252	278.43	-2.24192	down	0.010209	0.255086	yes	chr2	226864604	226914351	+	5	circRNA	ENST00000341329	RHBDD1	chr2:226836087-226864603|chr2:226914351-226995430	rhomboid domain containing 1 [Source:HGNC Symbol;Acc:HGNC:23081]
circRNA4402	0	12.9249	25.8605	13.959	15.7026	13.3348	61.9373	217.595	105.923	63.104	154.477	194.901	-3.28642	down	0.010211	0.255086	yes	chr10	84438512	84477664	+	4	circRNA	ENST00000372088	CCSER2	chr10:84425893-84438511|chr10:84477664-84513448	coiled-coil serine rich protein 2 [Source:HGNC Symbol;Acc:HGNC:29197]
circRNA3183	97.2234	426.522	64.6514	139.59	251.242	80.009	433.561	823.751	582.576	389.141	995.519	598.624	-1.85174	down	0.01022	0.255086	yes	chr1	155438327	155459898	-	2	circRNA	ENST00000368346	ASH1L	chr1:155415923-155438326|chr1:155459898-155477885	ASH1 like histone lysine methyltransferase [Source:HGNC Symbol;Acc:HGNC:19088]
circRNA12182	0	0	0	13.959	0	0	30.9686	77.7124	52.9614	73.6214	223.134	0	-5.03733	down	0.010262	0.255703	yes	chr2	159149142	159150556	+	2	circRNA	ENST00000263635	TANC1	chr2:159136298-159149141|chr2:159150556-159163282	tetratricopeptide repeat, ankyrin repeat and coiled-coil containing 1 [Source:HGNC Symbol;Acc:HGNC:29364]
circRNA9678	0	0	12.9303	0	0	0	0	108.797	66.2018	84.1387	85.8206	55.686	-4.9535	down	0.010316	0.256617	yes	chr5	135369406	135370142	-	2	circRNA	ENST00000511689	H2AFY	chr5:135360607-135369405|chr5:135370142-135388921	H2A histone family member Y [Source:HGNC Symbol;Acc:HGNC:4740]
circRNA16532	0	0	0	0	0	0	30.9686	62.1699	39.7211	0	102.985	41.7645	-inf	down	0.010385	0.2579	yes	chr10	26934413	26935627	-	2	circRNA	ENST00000639963	FAM238C	chr10:26931562-26934412|chr10:26935627-26936736	family with sequence similarity 238 member C (non-protein coding) [Source:HGNC Symbol;Acc:HGNC:24672]
circRNA8363	0	0	25.8605	13.959	0	0	46.453	124.34	105.923	42.0693	171.641	69.6074	-3.81396	down	0.010457	0.259253	yes	chr11	110136663	110137414	+	1	circRNA	ENST00000278590	ZC3H12C	chr11:110093432-110136662|chr11:110137414-110152918	zinc finger CCCH-type containing 12C [Source:HGNC Symbol;Acc:HGNC:29362]
circRNA11316	0	0	0	13.959	94.2159	0	0	139.882	119.163	94.656	308.954	97.4504	-2.81284	down	0.01058	0.261864	yes	chr16	23988508	24035547	+	3	circRNA	ENST00000321728	PRKCB	chr16:23837406-23988507|chr16:24035547-24092790	protein kinase C beta [Source:HGNC Symbol;Acc:HGNC:9395]
circRNA7132	0	51.6996	0	0	62.8106	26.6697	108.39	202.052	119.163	231.381	188.805	83.5289	-2.72484	down	0.010736	0.265281	yes	chr2	226906793	226914351	+	3	circRNA	ENST00000341329	RHBDD1	chr2:226867318-226906792|chr2:226914351-226995430	rhomboid domain containing 1 [Source:HGNC Symbol;Acc:HGNC:23081]
circRNA4705	0	12.9249	0	0	0	0	46.453	155.425	66.2018	21.0347	85.8206	13.9215	-4.91101	down	0.010946	0.27002	yes	chr17	78079395	78083166	+	2	circRNA	ENST00000636222	TNRC6C	chr17:78077334-78079394|chr17:78083166-78086502	trinucleotide repeat containing 6C [Source:HGNC Symbol;Acc:HGNC:29318]
circRNA3390	69.4453	12.9249	0	0	0	0	30.9686	139.882	105.923	105.173	137.313	125.293	-2.96811	down	0.010979	0.270383	yes	chr9	104883039	104889195	-	3	circRNA	ENST00000374736	ABCA1	chr9:104861800-104883038|chr9:104889195-104903613	ATP binding cassette subfamily A member 1 [Source:HGNC Symbol;Acc:HGNC:29]
circRNA549	13.8891	180.949	90.5119	69.7952	31.4053	13.3348	139.359	264.222	291.288	347.072	429.103	320.194	-2.1633	down	0.011022	0.270836	yes	chr10	34269657	34284245	-	2	circRNA	ENST00000545260	PARD3	chr10:34131583-34269656|chr10:34284245-34317106	par-3 family cell polarity regulator [Source:HGNC Symbol;Acc:HGNC:16051]
circRNA821	41.6672	103.399	77.5816	55.8361	31.4053	26.6697	108.39	512.902	145.644	220.864	549.252	473.331	-2.57854	down	0.011034	0.270836	yes	chr16	1809238	1809833	-	2	circRNA	ENST00000564445	HAGH	chr16:1795720-1809237|chr16:1809833-1816892	hydroxyacylglutathione hydrolase [Source:HGNC Symbol;Acc:HGNC:4805]
circRNA14470	0	0	0	0	0	26.6697	15.4843	124.34	79.4422	126.208	51.4924	55.686	-4.08513	down	0.011087	0.271687	yes	chr11	68166982	68190152	-	9	circRNA	ENST00000304363	KMT5B	chr11:68159171-68166981|chr11:68190152-68213137	lysine methyltransferase 5B [Source:HGNC Symbol;Acc:HGNC:24283]
circRNA5686	0	77.5494	90.5119	69.7952	0	53.3393	15.4843	15.5425	26.4807	0	0	0	2.34017	up	0.011121	0.272069	yes	chr20	51674153	51676208	-	2	circRNA	ENST00000311637	ATP9A	chr20:51671257-51674152|chr20:51676208-51712965	ATPase phospholipid transporting 9A (putative) [Source:HGNC Symbol;Acc:HGNC:13540]
circRNA19313	0	0	0	0	0	0	0	170.967	0	157.76	0	13.9215	-inf	down	0.011147	0.272255	yes	chr12	103806322	103815121	-	3	circRNA	ENST00000392876	NT5DC3	chr12:103798677-103806321|chr12:103815121-103840948	5'-nucleotidase domain containing 3 [Source:HGNC Symbol;Acc:HGNC:30826]
circRNA19257	0	0	0	0	0	0	0	31.085	66.2018	10.5173	68.6565	97.4504	-inf	down	0.011271	0.274403	yes	chr12	65308529	65328603	+	3	circRNA	ENST00000308259	MSRB3	chr12:65278865-65308528|chr12:65328603-65368997	methionine sulfoxide reductase B3 [Source:HGNC Symbol;Acc:HGNC:27375]
circRNA16552	0	0	0	0	0	0	15.4843	108.797	66.2018	21.0347	68.6565	0	-inf	down	0.011272	0.274403	yes	chr10	37803833	37838111	-	4	circRNA	ENST00000485560	ZNF248	chr10:37803692-37803832|chr10:37838111-37856295	zinc finger protein 248 [Source:HGNC Symbol;Acc:HGNC:13041]
circRNA4253	0	64.6245	0	27.9181	0	26.6697	46.453	279.765	185.365	147.243	34.3283	153.136	-2.82762	down	0.011323	0.274964	yes	chr11	118786052	118786518	-	1	circRNA	ENST00000620157	DDX6	chr11:118781184-118786051|chr11:118786518-118790854	DEAD-box helicase 6 [Source:HGNC Symbol;Acc:HGNC:2747]
circRNA10887	0	0	12.9303	0	0	0	15.4843	62.1699	92.6825	31.552	120.149	55.686	-4.86851	down	0.01136	0.274964	yes	chr8	117528651	117530827	+	2	circRNA	ENST00000297347	MED30	chr8:117521053-117528650|chr8:117530827-117539882	mediator complex subunit 30 [Source:HGNC Symbol;Acc:HGNC:23032]
circRNA13079	0	0	0	0	47.1079	0	201.296	124.34	0	63.104	223.134	0	-3.69919	down	0.011364	0.274964	yes	chr15	100564692	100565265	-	2	circRNA	ENST00000560783	LINS1	chr15:100559523-100564691|chr15:100565265-100573650	lines homolog 1 [Source:HGNC Symbol;Acc:HGNC:30922]
circRNA20890	0	0	0	0	0	0	0	186.51	0	63.104	102.985	0	-inf	down	0.011373	0.274964	yes	chr18	79193183	79214038	+	3	circRNA	ENST00000426216	ATP9B	chr18:79176907-79193182|chr18:79214038-79253380	ATPase phospholipid transporting 9B (putative) [Source:HGNC Symbol;Acc:HGNC:13541]
circRNA3787	0	77.5494	77.5816	13.959	0	40.0045	15.4843	0	0	0	0	0	3.75528	up	0.011414	0.274964	yes	chr13	71557024	71573573	-	4	circRNA	ENST00000619232	DACH1	chr13:71489148-71557023|chr13:71573573-71630555	dachshund family transcription factor 1 [Source:HGNC Symbol;Acc:HGNC:2663]
circRNA12517	0	0	0	13.959	0	0	0	77.7124	66.2018	31.552	154.477	111.372	-4.98254	down	0.011423	0.274964	yes	chr8	141160632	141163429	+	2	circRNA	ENST00000262585	DENND3	chr8:141155970-141160631|chr8:141163429-141165185	DENN domain containing 3 [Source:HGNC Symbol;Acc:HGNC:29134]
circRNA4167	0	12.9249	0	0	0	0	0	139.882	119.163	10.5173	34.3283	111.372	-5.0058	down	0.011435	0.274964	yes	chr11	68567014	68583129	+	6	circRNA	ENST00000393800	PPP6R3	chr11:68564432-68567013|chr11:68583129-68587926	protein phosphatase 6 regulatory subunit 3 [Source:HGNC Symbol;Acc:HGNC:1173]
circRNA21925	0	0	0	0	0	0	0	46.6274	66.2018	73.6214	34.3283	27.843	-inf	down	0.011469	0.274964	yes	chr4	150302625	150491035	-	13	circRNA	ENST00000503716	LRBA	chr4:150286034-150302624|chr4:150491035-150581317	LPS responsive beige-like anchor protein [Source:HGNC Symbol;Acc:HGNC:1742]
circRNA9235	0	0	64.6514	27.9181	0	40.0045	0	0	0	0	0	0	inf	up	0.011484	0.274964	yes	chr7	20154193	20161870	-	3	circRNA	ENST00000400331	MACC1	chr7:20141158-20154192|chr7:20161870-20164255	MACC1, MET transcriptional regulator [Source:HGNC Symbol;Acc:HGNC:30215]
circRNA23443	0	0	0	0	0	0	0	62.1699	92.6825	10.5173	85.8206	27.843	-inf	down	0.011495	0.274964	yes	chr8	76704043	76708048	+	2	circRNA	ENST00000521891	ZFHX4	chr8:76681620-76704042|chr8:76708048-76778207	zinc finger homeobox 4 [Source:HGNC Symbol;Acc:HGNC:30939]
circRNA7053	0	77.5494	0	13.959	31.4053	13.3348	0	0	0	0	0	0	inf	up	0.011502	0.274964	yes	chr2	172558708	172596023	+	10	circRNA	ENST00000410055	PDK1	chr2:172556346-172558707|chr2:172596023-172597612	pyruvate dehydrogenase kinase 1 [Source:HGNC Symbol;Acc:HGNC:8809]
circRNA2878	69.4453	25.8498	51.7211	0	15.7026	40.0045	247.749	279.765	172.125	115.691	102.985	264.508	-2.54465	down	0.011518	0.274964	yes	chr2	210153495	210154611	-	1	circRNA	ENST00000281772	KANSL1L	chr2:210129172-210153494|chr2:210154611-210171148	KAT8 regulatory NSL complex subunit 1 like [Source:HGNC Symbol;Acc:HGNC:26310]
circRNA18683	0	0	0	0	0	0	30.9686	0	79.4422	84.1387	0	55.686	-inf	down	0.011551	0.275308	yes	chr9	20715322	20740340	+	4	circRNA	ENST00000380249	FOCAD	chr9:20694564-20715321|chr9:20740340-20758089	focadhesin [Source:HGNC Symbol;Acc:HGNC:23377]
circRNA17558	0	0	0	0	0	0	77.4216	93.2549	13.2404	10.5173	34.3283	27.843	-inf	down	0.01169	0.278173	yes	chr6	84185187	84204096	-	7	circRNA	ENST00000257766	CEP162	chr6:84175347-84185186|chr6:84204096-84212956	centrosomal protein 162 [Source:HGNC Symbol;Acc:HGNC:21107]
circRNA19212	0	0	0	0	0	0	0	93.2549	66.2018	0	68.6565	55.686	-inf	down	0.011765	0.279508	yes	chr12	45836589	45839496	+	5	circRNA	ENST00000334344	ARID2	chr12:45821487-45836588|chr12:45839496-45846855	AT-rich interaction domain 2 [Source:HGNC Symbol;Acc:HGNC:18037]
circRNA3346	13.8891	0	0	27.9181	15.7026	0	170.328	93.2549	39.7211	63.104	85.8206	167.058	-3.42873	down	0.011893	0.282097	yes	chr9	36352742	36353331	-	2	circRNA	ENST00000259605	RNF38	chr9:36351199-36352741|chr9:36353331-36356302	ring finger protein 38 [Source:HGNC Symbol;Acc:HGNC:18052]
circRNA16793	0	0	0	0	0	0	46.453	93.2549	39.7211	52.5867	17.1641	0	-inf	down	0.011981	0.283729	yes	chr17	81596116	81608822	-	6	circRNA	ENST00000331134	NPLOC4	chr17:81589104-81596115|chr17:81608822-81610209	NPL4 homolog, ubiquitin recognition factor [Source:HGNC Symbol;Acc:HGNC:18261]
circRNA16332	0	0	0	0	0	0	15.4843	0	39.7211	0	154.477	111.372	-inf	down	0.012036	0.284576	yes	chr12	109167896	109171914	+	2	circRNA	ENST00000338432	ACACB	chr12:109166993-109167895|chr12:109171914-109172274	acetyl-CoA carboxylase beta [Source:HGNC Symbol;Acc:HGNC:85]
circRNA4777	0	12.9249	0	13.959	15.7026	0	0	217.595	52.9614	94.656	154.477	83.5289	-3.82421	down	0.012077	0.28509	yes	chr16	16106738	16111582	+	2	circRNA	ENST00000399410	ABCC1	chr16:16102717-16106737|chr16:16111582-16114765	ATP binding cassette subfamily C member 1 [Source:HGNC Symbol;Acc:HGNC:51]
circRNA2672	13.8891	38.7747	116.372	0	15.7026	13.3348	108.39	357.477	105.923	115.691	223.134	208.822	-2.49866	down	0.012123	0.285721	yes	chr2	54982515	54987698	-	2	circRNA	ENST00000394609	RTN4	chr2:54974764-54982514|chr2:54987698-55010086	reticulon 4 [Source:HGNC Symbol;Acc:HGNC:14085]
circRNA5114	0	12.9249	0	0	0	0	15.4843	77.7124	52.9614	84.1387	120.149	27.843	-4.87126	down	0.01215	0.285902	yes	chr14	23033368	23033674	-	1	circRNA	ENST00000555895	PSMB5	chr14:23016635-23033367|chr14:23033674-23034683	proteasome subunit beta 5 [Source:HGNC Symbol;Acc:HGNC:9542]
circRNA5304	0	38.7747	0	41.8771	0	0	0	248.68	158.884	168.277	102.985	41.7645	-3.1594	down	0.012226	0.286895	yes	chr19	10913877	10916777	+	3	circRNA	ENST00000327064	CARM1	chr19:10912294-10913876|chr19:10916777-10919594	coactivator associated arginine methyltransferase 1 [Source:HGNC Symbol;Acc:HGNC:23393]
circRNA3038	13.8891	0	25.8605	0	15.7026	0	0	264.222	92.6825	105.173	223.134	69.6074	-3.76681	down	0.012231	0.286895	yes	chr1	41113283	41143112	-	3	circRNA	ENST00000397174	SCMH1	chr1:41075451-41113282|chr1:41143112-41151613	sex comb on midleg homolog 1 (Drosophila) [Source:HGNC Symbol;Acc:HGNC:19003]
circRNA4206	0	12.9249	0	0	0	0	15.4843	62.1699	92.6825	31.552	85.8206	83.5289	-4.84412	down	0.012321	0.288421	yes	chr11	86250296	86256512	+	4	circRNA	ENST00000263360	EED	chr11:86245343-86250295|chr11:86256512-86257514	embryonic ectoderm development [Source:HGNC Symbol;Acc:HGNC:3188]
circRNA21222	0	0	0	0	0	0	0	31.085	39.7211	0	137.313	97.4504	-inf	down	0.012335	0.288421	yes	chr7	80789306	80805758	-	6	circRNA	ENST00000265361	SEMA3C	chr7:80765243-80789305|chr7:80805758-80810610	semaphorin 3C [Source:HGNC Symbol;Acc:HGNC:10725]
circRNA1290	83.3344	51.6996	64.6514	97.7132	62.8106	66.6741	46.453	31.085	39.7211	21.0347	17.1641	27.843	1.21963	up	0.012355	0.288433	yes	chr19	19640085	19640571	-	3	circRNA	ENST00000203556	GMIP	chr19:19638482-19640084|chr19:19640571-19641809	GEM interacting protein [Source:HGNC Symbol;Acc:HGNC:24852]
circRNA23292	0	0	0	0	0	0	0	139.882	26.4807	73.6214	51.4924	0	-inf	down	0.012421	0.289201	yes	chr9	121989195	121989770	-	1	circRNA	ENST00000321582	TTLL11	chr9:121974979-121989194|chr9:121989770-122031722	tubulin tyrosine ligase like 11 [Source:HGNC Symbol;Acc:HGNC:18113]
circRNA2076	55.5563	38.7747	12.9303	0	0	0	0	124.34	158.884	220.864	291.79	167.058	-3.16631	down	0.012427	0.289201	yes	chr5	77463095	77464809	-	2	circRNA	ENST00000296679	WDR41	chr5:77459124-77463094|chr5:77464809-77489456	WD repeat domain 41 [Source:HGNC Symbol;Acc:HGNC:25601]
circRNA16568	0	0	0	0	0	0	15.4843	139.882	0	31.552	34.3283	55.686	-inf	down	0.012464	0.289607	yes	chr10	60084602	60085253	-	2	circRNA	ENST00000280772	ANK3	chr10:60083617-60084601|chr10:60085253-60086676	ankyrin 3 [Source:HGNC Symbol;Acc:HGNC:494]
circRNA4195	0	77.5494	38.7908	27.9181	0	0	61.9373	202.052	132.404	189.312	137.313	153.136	-2.60253	down	0.012502	0.290035	yes	chr11	77619606	77629899	-	5	circRNA	ENST00000525428	CLNS1A	chr11:77616695-77619605|chr11:77629899-77637589	chloride nucleotide-sensitive channel 1A [Source:HGNC Symbol;Acc:HGNC:2080]
circRNA6415	0	90.4743	103.442	0	0	40.0045	0	248.68	158.884	178.795	463.431	361.959	-2.59339	down	0.012546	0.290288	yes	chr4	51863437	51877854	+	3	circRNA	ENST00000509376	DCUN1D4	chr4:51843267-51863436|chr4:51877854-51886567	defective in cullin neddylation 1 domain containing 4 [Source:HGNC Symbol;Acc:HGNC:28998]
circRNA25292	0	0	0	0	0	0	0	0	66.2018	63.104	102.985	41.7645	-inf	down	0.012565	0.290288	yes	chr6	93356717	93358411	-	2	circRNA	ENST00000369303	EPHA7	chr6:93272422-93356716|chr6:93358411-93410500	EPH receptor A7 [Source:HGNC Symbol;Acc:HGNC:3390]
circRNA23289	0	0	0	0	0	0	0	15.5425	0	73.6214	51.4924	153.136	-inf	down	0.012585	0.290288	yes	chr9	121678678	121699458	+	2	circRNA	ENST00000394340	DAB2IP	chr9:121567228-121678677|chr9:121699458-121757012	DAB2 interacting protein [Source:HGNC Symbol;Acc:HGNC:17294]
circRNA2768	55.5563	0	12.9303	0	0	0	92.9059	93.2549	52.9614	105.173	102.985	125.293	-3.06357	down	0.012611	0.290288	yes	chr2	121457687	121458975	-	2	circRNA	ENST00000263710	CLASP1	chr2:121451849-121457686|chr2:121458975-121459979	cytoplasmic linker associated protein 1 [Source:HGNC Symbol;Acc:HGNC:17088]
circRNA1438	166.669	90.4743	103.442	69.7952	188.432	26.6697	216.781	559.529	529.614	420.693	583.58	389.802	-2.06451	down	0.012611	0.290288	yes	chr20	2964272	2965202	+	2	circRNA	ENST00000380393	PTPRA	chr20:2948024-2964271|chr20:2965202-2975214	protein tyrosine phosphatase, receptor type A [Source:HGNC Symbol;Acc:HGNC:9664]
circRNA3338	41.6672	206.799	103.442	195.426	141.324	53.3393	185.812	528.444	476.653	599.488	823.878	417.645	-2.03075	down	0.0128	0.294181	yes	chr9	33971651	33973237	-	2	circRNA	ENST00000379238	UBAP2	chr9:33963791-33971650|chr9:33973237-33986759	ubiquitin associated protein 2 [Source:HGNC Symbol;Acc:HGNC:14185]
circRNA12805	0	0	0	0	15.7026	0	0	62.1699	79.4422	73.6214	154.477	27.843	-4.66207	down	0.012829	0.294391	yes	chr10	29462277	29463635	-	2	circRNA	ENST00000375400	SVIL	chr10:29458589-29462276|chr10:29463635-29465594	supervillin [Source:HGNC Symbol;Acc:HGNC:11480]
circRNA8909	0	0	64.6514	0	0	0	92.9059	77.7124	79.4422	31.552	188.805	69.6074	-3.06227	down	0.01293	0.296249	yes	chr14	103003928	103012188	-	3	circRNA	ENST00000361246	CDC42BPB	chr14:102999713-103003927|chr14:103012188-103056998	CDC42 binding protein kinase beta [Source:HGNC Symbol;Acc:HGNC:1738]
circRNA20862	0	0	0	0	0	0	0	15.5425	52.9614	105.173	17.1641	55.686	-inf	down	0.013066	0.29867	yes	chr18	50663089	50664504	+	1	circRNA	ENST00000400384	MAPK4	chr18:50560243-50663088|chr18:50664504-50715078	mitogen-activated protein kinase 4 [Source:HGNC Symbol;Acc:HGNC:6878]
circRNA16408	0	0	0	0	0	0	15.4843	62.1699	39.7211	21.0347	51.4924	41.7645	-inf	down	0.013076	0.29867	yes	chr11	36633284	36648155	+	3	circRNA	ENST00000446510	C11orf74	chr11:36610239-36633283|chr11:36648155-36659018	chromosome 11 open reading frame 74 [Source:HGNC Symbol;Acc:HGNC:25142]
circRNA2598	13.8891	0	0	0	0	0	0	139.882	39.7211	94.656	51.4924	97.4504	-4.92933	down	0.013263	0.302474	yes	chr3	197865423	197871462	+	4	circRNA	ENST00000438796	LRCH3	chr3:197858905-197865422|chr3:197871462-197875697	leucine rich repeats and calponin homology domain containing 3 [Source:HGNC Symbol;Acc:HGNC:28637]
circRNA16592	0	0	0	0	0	0	30.9686	124.34	13.2404	21.0347	34.3283	27.843	-inf	down	0.013335	0.303137	yes	chr10	91425281	91462184	+	4	circRNA	ENST00000446394	HECTD2	chr10:91410576-91425280|chr10:91462184-91478200	HECT domain E3 ubiquitin protein ligase 2 [Source:HGNC Symbol;Acc:HGNC:26736]
circRNA3155	13.8891	25.8498	25.8605	27.9181	15.7026	0	0	0	0	0	0	0	inf	up	0.013339	0.303137	yes	chr1	147966554	147969959	+	3	circRNA	ENST00000314163	GPR89B	chr1:147954402-147966553|chr1:147969959-147986198	G protein-coupled receptor 89B [Source:HGNC Symbol;Acc:HGNC:13840]
circRNA16438	0	0	0	0	0	0	77.4216	108.797	26.4807	0	68.6565	0	-inf	down	0.013371	0.303137	yes	chr11	70333470	70338453	+	4	circRNA	ENST00000253925	PPFIA1	chr11:70332094-70333469|chr11:70338453-70339170	PTPRF interacting protein alpha 1 [Source:HGNC Symbol;Acc:HGNC:9245]
circRNA1359	13.8891	0	90.5119	27.9181	0	26.6697	15.4843	279.765	132.404	262.933	137.313	236.665	-2.74327	down	0.013374	0.303137	yes	chr18	44701175	44701832	+	1	circRNA	ENST00000426838	SETBP1	chr18:44680395-44701174|chr18:44701832-44869229	SET binding protein 1 [Source:HGNC Symbol;Acc:HGNC:15573]
circRNA23064	0	0	0	0	0	0	0	62.1699	52.9614	31.552	34.3283	55.686	-inf	down	0.013571	0.307132	yes	chr1	204952011	205002748	+	23	circRNA	ENST00000339876	NFASC	chr1:204950574-204952010|chr1:205002748-205009556	neurofascin [Source:HGNC Symbol;Acc:HGNC:29866]
circRNA17517	0	0	0	0	0	0	46.453	155.425	0	63.104	0	13.9215	-inf	down	0.013639	0.307825	yes	chr6	37650109	37652340	-	2	circRNA	ENST00000434837	MDGA1	chr6:37649266-37650108|chr6:37652340-37654273	MAM domain containing glycosylphosphatidylinositol anchor 1 [Source:HGNC Symbol;Acc:HGNC:19267]
circRNA1661	41.6672	0	0	0	0	0	216.781	0	132.404	0	0	222.744	-3.77885	down	0.013649	0.307825	yes	chr7	72728822	72744601	-	2	circRNA	ENST00000612372	TYW1B	chr7:72713798-72728821|chr7:72744601-72777415	tRNA-yW synthesizing protein 1 homolog B [Source:HGNC Symbol;Acc:HGNC:33908]
circRNA18089	0	0	0	0	0	0	30.9686	108.797	0	42.0693	68.6565	13.9215	-inf	down	0.013664	0.307825	yes	chr3	154217869	154240579	+	3	circRNA	ENST00000356448	ARHGEF26	chr3:154194718-154217868|chr3:154240579-154253115	Rho guanine nucleotide exchange factor 26 [Source:HGNC Symbol;Acc:HGNC:24490]
circRNA23097	0	0	0	0	0	0	0	77.7124	105.923	0	17.1641	69.6074	-inf	down	0.013793	0.310259	yes	chr1	227193786	227213219	-	3	circRNA	ENST00000366767	CDC42BPA	chr1:227160636-227193785|chr1:227213219-227254063	CDC42 binding protein kinase alpha [Source:HGNC Symbol;Acc:HGNC:1737]
circRNA25692	0	0	0	0	0	0	0	0	79.4422	10.5173	68.6565	125.293	-inf	down	0.013987	0.314145	yes	chr4	182600924	182628889	+	2	circRNA	ENST00000511685	TENM3	chr4:182346929-182600923|chr4:182628889-182653770	teneurin transmembrane protein 3 [Source:HGNC Symbol;Acc:HGNC:29944]
circRNA1285	27.7781	12.9249	25.8605	0	0	0	77.4216	108.797	26.4807	262.933	137.313	111.372	-3.44382	down	0.014047	0.315015	yes	chr19	18537601	18538433	-	2	circRNA	ENST00000596558	FKBP8	chr19:18533347-18537600|chr19:18538433-18539370	FK506 binding protein 8 [Source:HGNC Symbol;Acc:HGNC:3724]
circRNA9470	0	0	25.8605	0	0	0	77.4216	62.1699	52.9614	31.552	120.149	69.6074	-4.00032	down	0.014079	0.315255	yes	chr6	116689320	116705160	+	6	circRNA	ENST00000368564	KPNA5	chr6:116681338-116689319|chr6:116705160-116716218	karyopherin subunit alpha 5 [Source:HGNC Symbol;Acc:HGNC:6398]
circRNA974	69.4453	25.8498	0	0	0	13.3348	0	155.425	172.125	147.243	154.477	208.822	-2.94769	down	0.014155	0.316045	yes	chr15	41696075	41699159	+	3	circRNA	ENST00000563576	MGA	chr15:41669958-41696074|chr15:41699159-41707727	MGA, MAX dimerization protein [Source:HGNC Symbol;Acc:HGNC:14010]
circRNA206	13.8891	155.099	77.5816	153.549	188.432	0	216.781	466.274	198.605	410.176	669.401	348.037	-1.9722	down	0.014157	0.316045	yes	chr12	27714780	27724186	+	4	circRNA	ENST00000081029	MRPS35	chr12:27710955-27714779|chr12:27724186-27735446	mitochondrial ribosomal protein S35 [Source:HGNC Symbol;Acc:HGNC:16635]
circRNA7244	0	25.8498	38.7908	0	62.8106	0	30.9686	217.595	145.644	105.173	223.134	125.293	-2.73379	down	0.01419	0.316305	yes	chr1	39853970	39857417	-	2	circRNA	ENST00000537440	TRIT1	chr1:39852876-39853969|chr1:39857417-39883317	tRNA isopentenyltransferase 1 [Source:HGNC Symbol;Acc:HGNC:20286]
circRNA16389	0	0	0	0	0	0	61.9373	77.7124	26.4807	31.552	0	27.843	-inf	down	0.014219	0.316474	yes	chr11	14830698	14861366	+	7	circRNA	ENST00000282096	PDE3B	chr11:14819209-14830697|chr11:14861366-14867505	phosphodiesterase 3B [Source:HGNC Symbol;Acc:HGNC:8779]
circRNA2055	13.8891	90.4743	25.8605	55.8361	15.7026	26.6697	0	31.085	0	0	0	27.843	1.95474	up	0.014318	0.318199	yes	chr5	69174877	69175537	+	2	circRNA	ENST00000256442	CCNB1	chr5:69174409-69174876|chr5:69175537-69177238	cyclin B1 [Source:HGNC Symbol;Acc:HGNC:1579]
circRNA22474	0	0	0	0	0	0	0	93.2549	52.9614	31.552	0	69.6074	-inf	down	0.014536	0.322254	yes	chr2	86251957	86264041	-	3	circRNA	ENST00000165698	REEP1	chr2:86232802-86251956|chr2:86264041-86282169	receptor accessory protein 1 [Source:HGNC Symbol;Acc:HGNC:25786]
circRNA21854	0	0	0	0	0	0	0	155.425	0	63.104	102.985	0	-inf	down	0.014544	0.322254	yes	chr4	94573351	94640450	+	5	circRNA	ENST00000437932	PDLIM5	chr4:94523875-94573350|chr4:94640450-94654459	PDZ and LIM domain 5 [Source:HGNC Symbol;Acc:HGNC:17468]
circRNA23454	0	0	0	0	0	0	0	15.5425	13.2404	31.552	102.985	111.372	-inf	down	0.014635	0.323766	yes	chr8	89724629	89725641	-	2	circRNA	ENST00000504145	AF117829.1	chr8:89722156-89724628|chr8:89725641-89757044	NA
circRNA18430	0	0	0	0	0	0	46.453	93.2549	26.4807	0	51.4924	27.843	-inf	down	0.014656	0.323766	yes	chr1	21701498	21703618	-	2	circRNA	ENST00000400301	USP48	chr1:21690099-21701497|chr1:21703618-21704261	ubiquitin specific peptidase 48 [Source:HGNC Symbol;Acc:HGNC:18533]
circRNA1125	97.2234	142.174	38.7908	0	157.026	66.6741	263.233	497.359	317.769	262.933	514.924	236.665	-2.06005	down	0.014796	0.325908	yes	chr14	22906195	22911403	-	4	circRNA	ENST00000359890	RBM23	chr14:22905659-22906194|chr14:22911403-22918998	RNA binding motif protein 23 [Source:HGNC Symbol;Acc:HGNC:20155]
circRNA7765	0	12.9249	0	41.8771	31.4053	80.009	201.296	264.222	145.644	136.725	205.97	69.6074	-2.62233	down	0.014797	0.325908	yes	chr8	28155942	28162078	+	4	circRNA	ENST00000521015	ELP3	chr8:28137891-28155941|chr8:28162078-28189648	elongator acetyltransferase complex subunit 3 [Source:HGNC Symbol;Acc:HGNC:20696]
circRNA17682	0	0	0	0	0	0	15.4843	62.1699	13.2404	42.0693	34.3283	55.686	-inf	down	0.014862	0.326499	yes	chr5	52849365	52865817	+	5	circRNA	ENST00000282588	ITGA1	chr5:52788414-52849364|chr5:52865817-52881872	integrin subunit alpha 1 [Source:HGNC Symbol;Acc:HGNC:6134]
circRNA12068	0	0	0	27.9181	15.7026	0	46.453	124.34	39.7211	42.0693	137.313	153.136	-3.63795	down	0.014872	0.326499	yes	chr3	152299405	152300367	+	1	circRNA	ENST00000282486	MBNL1	chr3:152269092-152299404|chr3:152300367-152414940	muscleblind like splicing regulator 1 [Source:HGNC Symbol;Acc:HGNC:6923]
circRNA16717	0	0	0	0	0	0	46.453	139.882	39.7211	0	51.4924	0	-inf	down	0.01489	0.326499	yes	chr17	48032156	48033944	-	4	circRNA	ENST00000621465	COPZ2	chr17:48029176-48032155|chr17:48033944-48036850	coatomer protein complex subunit zeta 2 [Source:HGNC Symbol;Acc:HGNC:19356]
circRNA22919	0	0	0	0	0	0	0	77.7124	13.2404	115.691	17.1641	27.843	-inf	down	0.014922	0.326717	yes	chr1	108885275	108904254	+	9	circRNA	ENST00000406462	GPSM2	chr1:108877228-108885274|chr1:108904254-108914337	G protein signaling modulator 2 [Source:HGNC Symbol;Acc:HGNC:29501]
circRNA9072	0	0	12.9303	0	0	0	0	93.2549	52.9614	94.656	120.149	27.843	-4.91044	down	0.015002	0.327521	yes	chr18	74630967	74641122	+	2	circRNA	ENST00000582337	ZNF407	chr18:74597937-74630966|chr18:74641122-74781427	zinc finger protein 407 [Source:HGNC Symbol;Acc:HGNC:19904]
circRNA23800	0	0	0	0	0	0	0	0	92.6825	31.552	102.985	41.7645	-inf	down	0.015003	0.327521	yes	chr12	99772922	99825389	-	7	circRNA	ENST00000547776	ANKS1B	chr12:99655210-99772921|chr12:99825389-99984103	ankyrin repeat and sterile alpha motif domain containing 1B [Source:HGNC Symbol;Acc:HGNC:24600]
circRNA22168	0	0	0	0	0	0	0	46.6274	39.7211	105.173	34.3283	13.9215	-inf	down	0.015095	0.329044	yes	chr3	127579740	127580163	-	2	circRNA	ENST00000296210	TPRA1	chr3:127577076-127579739|chr3:127580163-127590409	transmembrane protein adipocyte associated 1 [Source:HGNC Symbol;Acc:HGNC:30413]
circRNA18099	0	0	0	0	0	0	30.9686	46.6274	13.2404	10.5173	34.3283	97.4504	-inf	down	0.01516	0.329975	yes	chr3	170149086	170178938	-	4	circRNA	ENST00000495893	PHC3	chr3:170145521-170149085|chr3:170178938-170181701	polyhomeotic homolog 3 [Source:HGNC Symbol;Acc:HGNC:15682]
circRNA2330	13.8891	0	0	0	31.4053	40.0045	30.9686	108.797	132.404	126.208	223.134	97.4504	-3.07532	down	0.015346	0.333533	yes	chr4	127669036	127687867	+	4	circRNA	ENST00000335251	INTU	chr4:127663584-127669035|chr4:127687867-127700009	inturned planar cell polarity protein [Source:HGNC Symbol;Acc:HGNC:29239]
circRNA208	138.891	38.7747	90.5119	27.9181	266.945	26.6697	201.296	606.157	370.73	326.037	446.267	320.194	-1.94505	down	0.015458	0.335475	yes	chr12	28305649	28307749	+	3	circRNA	ENST00000535520	CCDC91	chr12:28304711-28305648|chr12:28307749-28362437	coiled-coil domain containing 91 [Source:HGNC Symbol;Acc:HGNC:24855]
circRNA2641	27.7781	64.6245	51.7211	83.7542	31.4053	40.0045	61.9373	404.104	238.326	273.451	257.462	431.566	-2.47752	down	0.01555	0.336977	yes	chr2	36396614	36442735	+	3	circRNA	ENST00000280527	CRIM1	chr2:36356623-36396613|chr2:36442735-36464533	cysteine rich transmembrane BMP regulator 1 [Source:HGNC Symbol;Acc:HGNC:2359]
circRNA12041	0	0	0	41.8771	0	0	0	46.6274	79.4422	84.1387	102.985	180.979	-3.56078	down	0.015662	0.338908	yes	chr3	107710452	107733023	+	4	circRNA	ENST00000415149	BBX	chr3:107645909-107710451|chr3:107733023-107744629	BBX, HMG-box containing [Source:HGNC Symbol;Acc:HGNC:14422]
circRNA19934	0	0	0	0	0	0	0	77.7124	39.7211	94.656	0	27.843	-inf	down	0.01574	0.339689	yes	chr17	17817548	17817916	-	1	circRNA	ENST00000395756	SREBF1	chr17:17817457-17817547|chr17:17817916-17818259	sterol regulatory element binding transcription factor 1 [Source:HGNC Symbol;Acc:HGNC:11289]
circRNA858	41.6672	38.7747	12.9303	27.9181	0	26.6697	15.4843	0	0	0	0	0	3.25633	up	0.015744	0.339689	yes	chr16	19466082	19469825	+	2	circRNA	ENST00000541464	TMC5	chr16:19464024-19466081|chr16:19469825-19474124	transmembrane channel like 5 [Source:HGNC Symbol;Acc:HGNC:22999]
circRNA12919	0	0	0	0	31.4053	0	46.453	139.882	26.4807	63.104	51.4924	97.4504	-3.75792	down	0.015885	0.342233	yes	chr17	47663089	47668410	+	4	circRNA	ENST00000535458	KPNB1	chr17:47661178-47663088|chr17:47668410-47669677	karyopherin subunit beta 1 [Source:HGNC Symbol;Acc:HGNC:6400]
circRNA18138	0	0	0	0	0	0	61.9373	31.085	39.7211	0	34.3283	55.686	-inf	down	0.015998	0.342886	yes	chr2	9350808	9358889	+	4	circRNA	ENST00000281419	ASAP2	chr2:9344800-9350807|chr2:9358889-9368424	ArfGAP with SH3 domain, ankyrin repeat and PH domain 2 [Source:HGNC Symbol;Acc:HGNC:2721]
circRNA1681	27.7781	0	0	0	15.7026	0	77.4216	31.085	66.2018	21.0347	223.134	111.372	-3.60822	down	0.016001	0.342886	yes	chr7	78343778	78346043	-	2	circRNA	ENST00000628980	MAGI2	chr7:78256581-78343777|chr7:78346043-78369155	membrane associated guanylate kinase, WW and PDZ domain containing 2 [Source:HGNC Symbol;Acc:HGNC:18957]
circRNA9813	0	0	12.9303	0	0	0	108.39	62.1699	0	52.5867	51.4924	125.293	-4.95093	down	0.016003	0.342886	yes	chr4	106171095	106212835	-	4	circRNA	ENST00000273980	TBCK	chr4:106116378-106171094|chr4:106212835-106230362	TBC1 domain containing kinase [Source:HGNC Symbol;Acc:HGNC:28261]
circRNA13006	0	0	0	0	62.8106	0	30.9686	139.882	52.9614	73.6214	274.626	0	-3.18709	down	0.016008	0.342886	yes	chr16	71920739	71923380	+	4	circRNA	ENST00000544564	IST1	chr16:71917134-71920738|chr16:71923380-71924768	IST1, ESCRT-III associated factor [Source:HGNC Symbol;Acc:HGNC:28977]
circRNA21216	0	0	0	0	0	0	0	124.34	26.4807	52.5867	34.3283	13.9215	-inf	down	0.016067	0.343653	yes	chr7	77274482	77280653	+	4	circRNA	ENST00000285871	CCDC146	chr7:77273789-77274481|chr7:77280653-77282556	coiled-coil domain containing 146 [Source:HGNC Symbol;Acc:HGNC:29296]
circRNA18289	0	0	0	0	0	0	201.296	0	13.2404	0	51.4924	27.843	-inf	down	0.016239	0.34683	yes	chr2	144208603	144235737	-	3	circRNA	ENST00000409214	GTDC1	chr2:144145739-144208602|chr2:144235737-144294364	glycosyltransferase like domain containing 1 [Source:HGNC Symbol;Acc:HGNC:20887]
circRNA23071	0	0	0	0	0	0	0	15.5425	66.2018	52.5867	34.3283	55.686	-inf	down	0.016326	0.347792	yes	chr1	213129527	213176492	+	3	circRNA	ENST00000543354	RPS6KC1	chr1:213117410-213129526|chr1:213176492-213230496	ribosomal protein S6 kinase C1 [Source:HGNC Symbol;Acc:HGNC:10439]
circRNA17487	0	0	0	0	0	0	77.4216	46.6274	26.4807	0	51.4924	27.843	-inf	down	0.016331	0.347792	yes	chr6	7303550	7310029	-	2	circRNA	ENST00000474597	SSR1	chr6:7301572-7303549|chr6:7310029-7313041	signal sequence receptor subunit 1 [Source:HGNC Symbol;Acc:HGNC:11323]
circRNA15682	0	0	0	0	0	13.3348	30.9686	108.797	105.923	10.5173	68.6565	41.7645	-4.78104	down	0.016387	0.348195	yes	chr2	110161603	110163135	-	2	circRNA	ENST00000316534	NPHP1	chr2:110160255-110161602|chr2:110163135-110164519	nephrocystin 1 [Source:HGNC Symbol;Acc:HGNC:7905]
circRNA10524	0	0	12.9303	0	0	0	15.4843	31.085	52.9614	94.656	120.149	41.7645	-4.78346	down	0.016397	0.348195	yes	chr1	96769703	96785254	+	5	circRNA	ENST00000482253	PTBP2	chr1:96723594-96769702|chr1:96785254-96804799	polypyrimidine tract binding protein 2 [Source:HGNC Symbol;Acc:HGNC:17662]
circRNA10541	0	0	64.6514	0	0	0	201.296	0	198.605	0	377.611	0	-3.58811	down	0.016465	0.348999	yes	chr1	112653598	112659779	+	4	circRNA	ENST00000263168	CAPZA1	chr1:112649469-112653597|chr1:112659779-112667073	capping actin protein of muscle Z-line alpha subunit 1 [Source:HGNC Symbol;Acc:HGNC:1488]
circRNA995	13.8891	38.7747	38.7908	41.8771	15.7026	40.0045	77.4216	155.425	211.846	210.347	343.283	194.901	-2.65811	down	0.016482	0.348999	yes	chr15	49235851	49239367	+	2	circRNA	ENST00000559883	GALK2	chr15:49217313-49235850|chr15:49239367-49281986	galactokinase 2 [Source:HGNC Symbol;Acc:HGNC:4119]
circRNA7143	0	25.8498	25.8605	27.9181	31.4053	26.6697	46.453	155.425	185.365	231.381	223.134	111.372	-2.79111	down	0.016511	0.349113	yes	chr2	238182065	238185287	-	4	circRNA	ENST00000254654	ILKAP	chr2:238173653-238182064|chr2:238185287-238188130	ILK associated serine/threonine phosphatase [Source:HGNC Symbol;Acc:HGNC:15566]
circRNA15252	0	0	0	0	0	26.6697	77.4216	46.6274	66.2018	84.1387	68.6565	41.7645	-3.85088	down	0.016574	0.349945	yes	chr6	107904629	107924932	-	9	circRNA	ENST00000369002	SEC63	chr6:107902998-107904628|chr6:107924932-107929414	SEC63 homolog, protein translocation regulator [Source:HGNC Symbol;Acc:HGNC:21082]
circRNA11363	0	0	0	13.959	0	0	30.9686	155.425	39.7211	73.6214	0	55.686	-4.67026	down	0.016605	0.350101	yes	chr15	28143873	28146344	-	4	circRNA	ENST00000261609	HERC2	chr15:28142952-28143872|chr15:28146344-28152676	HECT and RLD domain containing E3 ubiquitin protein ligase 2 [Source:HGNC Symbol;Acc:HGNC:4868]
circRNA2630	27.7781	219.723	245.675	27.9181	109.918	13.3348	247.749	481.817	251.567	210.347	875.37	348.037	-1.90604	down	0.016649	0.350529	yes	chr2	31917926	31932135	-	3	circRNA	ENST00000295065	MEMO1	chr2:31892134-31917925|chr2:31932135-31943301	mediator of cell motility 1 [Source:HGNC Symbol;Acc:HGNC:14014]
circRNA3701	0	25.8498	0	41.8771	0	53.3393	0	0	0	0	0	0	inf	up	0.016688	0.350813	yes	chrX	131749306	131794466	-	6	circRNA	ENST00000427391	FIRRE	chrX:131711720-131749305|chrX:131794466-131795808	firre intergenic repeating RNA element [Source:HGNC Symbol;Acc:HGNC:49627]
circRNA2307	55.5563	103.399	12.9303	111.672	78.5132	253.362	123.875	637.242	397.211	441.728	463.431	417.645	-2.01132	down	0.01673	0.350813	yes	chr4	87046166	87047594	+	2	circRNA	ENST00000395146	AFF1	chr4:86948571-87046165|chr4:87047594-87084119	AF4/FMR2 family member 1 [Source:HGNC Symbol;Acc:HGNC:7135]
circRNA1310	27.7781	38.7747	77.5816	0	31.4053	13.3348	30.9686	264.222	132.404	115.691	480.596	278.43	-2.78557	down	0.016764	0.350813	yes	chr19	40736986	40737769	+	2	circRNA	ENST00000263370	ITPKC	chr19:40733364-40736985|chr19:40737769-40739356	inositol-trisphosphate 3-kinase C [Source:HGNC Symbol;Acc:HGNC:14897]
circRNA800	13.8891	0	0	0	0	0	139.359	124.34	0	73.6214	17.1641	13.9215	-4.72927	down	0.016766	0.350813	yes	chr17	69128619	69134742	-	4	circRNA	ENST00000284425	ABCA6	chr17:69125035-69128618|chr17:69134742-69136091	ATP binding cassette subfamily A member 6 [Source:HGNC Symbol;Acc:HGNC:36]
circRNA2593	41.6672	0	0	0	0	0	15.4843	139.882	105.923	84.1387	85.8206	41.7645	-3.5049	down	0.016781	0.350813	yes	chr3	196806579	196812851	+	5	circRNA	ENST00000327134	PAK2	chr3:196805383-196806578|chr3:196812851-196814450	p21 (RAC1) activated kinase 2 [Source:HGNC Symbol;Acc:HGNC:8591]
circRNA10550	0	0	38.7908	0	47.1079	80.009	139.359	108.797	119.163	94.656	343.283	139.215	-2.50913	down	0.016924	0.353303	yes	chr1	114463104	114464388	-	3	circRNA	ENST00000358465	TRIM33	chr1:114433733-114463103|chr1:114464388-114510550	tripartite motif containing 33 [Source:HGNC Symbol;Acc:HGNC:16290]
circRNA1040	55.5563	0	0	0	15.7026	26.6697	61.9373	233.137	13.2404	73.6214	223.134	194.901	-3.03015	down	0.017064	0.355474	yes	chr15	64118117	64118854	+	2	circRNA	ENST00000560829	SNX1	chr15:64112684-64118116|chr15:64118854-64123502	sorting nexin 1 [Source:HGNC Symbol;Acc:HGNC:11172]
circRNA17721	0	0	0	0	0	0	30.9686	31.085	26.4807	42.0693	68.6565	13.9215	-inf	down	0.017076	0.355474	yes	chr5	74745678	74750667	-	4	circRNA	ENST00000296805	GFM2	chr5:74741609-74745677|chr5:74750667-74751367	G elongation factor mitochondrial 2 [Source:HGNC Symbol;Acc:HGNC:29682]
circRNA2208	13.8891	64.6245	25.8605	55.8361	47.1079	93.3438	46.453	31.085	26.4807	0	0	0	1.5313	up	0.017132	0.356139	yes	chr4	6994184	7001251	+	4	circRNA	ENST00000448507	TBC1D14	chr4:6967424-6994183|chr4:7001251-7004843	TBC1 domain family member 14 [Source:HGNC Symbol;Acc:HGNC:29246]
circRNA19428	0	0	0	0	0	0	0	46.6274	26.4807	42.0693	68.6565	41.7645	-inf	down	0.017194	0.356468	yes	chr11	8452822	8464822	-	5	circRNA	ENST00000447869	STK33	chr11:8440753-8452821|chr11:8464822-8473162	serine/threonine kinase 33 [Source:HGNC Symbol;Acc:HGNC:14568]
circRNA633	41.6672	25.8498	38.7908	41.8771	31.4053	13.3348	108.39	357.477	172.125	147.243	223.134	194.901	-2.64085	down	0.017196	0.356468	yes	chr10	110964125	110985765	+	2	circRNA	ENST00000369452	SHOC2	chr10:110919657-110964124|chr10:110985765-111000414	SHOC2, leucine rich repeat scaffold protein [Source:HGNC Symbol;Acc:HGNC:15454]
circRNA17274	0	0	0	0	0	0	30.9686	46.6274	26.4807	31.552	102.985	0	-inf	down	0.017322	0.358573	yes	chr20	8740344	8765358	+	5	circRNA	ENST00000637919	PLCB1	chr20:8739360-8740343|chr20:8765358-8774538	phospholipase C beta 1 [Source:HGNC Symbol;Acc:HGNC:15917]
circRNA20968	0	0	0	0	0	0	0	93.2549	0	52.5867	171.641	0	-inf	down	0.017346	0.358573	yes	chr22	41338313	41339191	+	2	circRNA	ENST00000352645	ZC3H7B	chr22:41332227-41338312|chr22:41339191-41339815	zinc finger CCCH-type containing 7B [Source:HGNC Symbol;Acc:HGNC:30869]
circRNA16705	0	0	0	0	0	0	30.9686	31.085	26.4807	52.5867	51.4924	13.9215	-inf	down	0.017416	0.359518	yes	chr17	42727635	42728952	-	2	circRNA	ENST00000428826	EZH1	chr17:42724424-42727634|chr17:42728952-42730827	enhancer of zeste 1 polycomb repressive complex 2 subunit [Source:HGNC Symbol;Acc:HGNC:3526]
circRNA5252	0	168.024	77.5816	13.959	0	40.0045	61.9373	435.189	158.884	178.795	308.954	194.901	-2.15983	down	0.017508	0.360914	yes	chr14	102040236	102040673	+	2	circRNA	ENST00000360184	DYNC1H1	chr14:102039732-102040235|chr14:102040673-102041573	dynein cytoplasmic 1 heavy chain 1 [Source:HGNC Symbol;Acc:HGNC:2961]
circRNA7348	0	25.8498	0	0	0	0	30.9686	46.6274	39.7211	73.6214	223.134	41.7645	-4.14029	down	0.017551	0.361297	yes	chr1	92563642	92636336	-	6	circRNA	ENST00000370331	EVI5	chr1:92513970-92563641|chr1:92636336-92665938	ecotropic viral integration site 5 [Source:HGNC Symbol;Acc:HGNC:3501]
circRNA6299	0	12.9249	77.5816	13.959	15.7026	0	0	0	0	0	0	0	inf	up	0.017706	0.363814	yes	chr5	160589592	160591139	-	2	circRNA	ENST00000327245	ATP10B	chr5:160569683-160589591|chr5:160591139-160598769	ATPase phospholipid transporting 10B (putative) [Source:HGNC Symbol;Acc:HGNC:13543]
circRNA1440	13.8891	0	0	0	0	0	30.9686	31.085	26.4807	42.0693	137.313	97.4504	-4.71733	down	0.017733	0.363814	yes	chr20	3296861	3298175	-	2	circRNA	ENST00000252032	C20orf194	chr20:3294629-3296860|chr20:3298175-3304439	chromosome 20 open reading frame 194 [Source:HGNC Symbol;Acc:HGNC:17721]
circRNA19121	0	0	0	0	0	0	0	62.1699	39.7211	52.5867	34.3283	27.843	-inf	down	0.017747	0.363814	yes	chr13	114021404	114027927	-	4	circRNA	ENST00000334062	RASA3	chr13:114018919-114021403|chr13:114027927-114029810	RAS p21 protein activator 3 [Source:HGNC Symbol;Acc:HGNC:20331]
circRNA2449	13.8891	12.9249	25.8605	55.8361	0	66.6741	77.4216	466.274	211.846	105.173	257.462	97.4504	-2.79475	down	0.017848	0.365378	yes	chr3	57242856	57248351	+	4	circRNA	ENST00000288266	APPL1	chr3:57242142-57242855|chr3:57248351-57249359	adaptor protein, phosphotyrosine interacting with PH domain and leucine zipper 1 [Source:HGNC Symbol;Acc:HGNC:24035]
circRNA857	27.7781	38.7747	0	55.8361	0	0	0	0	0	0	0	0	inf	up	0.018048	0.367867	yes	chr16	19463280	19472243	+	5	circRNA	ENST00000381414	TMC5	chr16:19460334-19463279|chr16:19472243-19474124	transmembrane channel like 5 [Source:HGNC Symbol;Acc:HGNC:22999]
circRNA7386	0	12.9249	51.7211	27.9181	0	13.3348	46.453	124.34	158.884	189.312	205.97	55.686	-2.88198	down	0.018048	0.367867	yes	chr1	147648246	147659775	-	8	circRNA	ENST00000583509	ACP6	chr1:147647566-147648245|chr1:147659775-147669829	acid phosphatase 6, lysophosphatidic [Source:HGNC Symbol;Acc:HGNC:29609]
circRNA16708	0	0	0	0	0	0	15.4843	124.34	13.2404	10.5173	34.3283	41.7645	-inf	down	0.018058	0.367867	yes	chr17	44084555	44087696	-	4	circRNA	ENST00000225983	HDAC5	chr17:44083854-44084554|chr17:44087696-44088386	histone deacetylase 5 [Source:HGNC Symbol;Acc:HGNC:14068]
circRNA2310	13.8891	0	0	0	0	0	30.9686	77.7124	39.7211	42.0693	68.6565	69.6074	-4.56491	down	0.018069	0.367867	yes	chr4	88061906	88065879	+	3	circRNA	ENST00000237596	PKD2	chr4:88058103-88061905|chr4:88065879-88067897	polycystin 2, transient receptor potential cation channel [Source:HGNC Symbol;Acc:HGNC:9009]
circRNA1389	27.7781	25.8498	0	0	0	13.3348	154.843	170.967	39.7211	31.552	102.985	97.4504	-3.15755	down	0.018233	0.370411	yes	chr18	76849526	76871825	+	4	circRNA	ENST00000320610	ZNF236	chr18:76822662-76849525|chr18:76871825-76875491	zinc finger protein 236 [Source:HGNC Symbol;Acc:HGNC:13028]
circRNA460	13.8891	0	12.9303	0	15.7026	0	46.453	93.2549	52.9614	73.6214	240.298	41.7645	-3.68882	down	0.018244	0.370411	yes	chr11	107390074	107418287	-	4	circRNA	ENST00000282251	CWF19L2	chr11:107353736-107390073|chr11:107418287-107428798	CWF19 like 2, cell cycle control (S. pombe) [Source:HGNC Symbol;Acc:HGNC:26508]
circRNA18630	0	0	0	0	0	0	46.453	77.7124	52.9614	42.0693	0	0	-inf	down	0.018341	0.37187	yes	chr1	235152706	235155112	-	2	circRNA	ENST00000408888	RBM34	chr1:235148447-235152705|chr1:235155112-235160510	RNA binding motif protein 34 [Source:HGNC Symbol;Acc:HGNC:28965]
circRNA799	152.78	77.5494	0	83.7542	0	40.0045	154.843	341.935	225.086	252.416	326.118	194.901	-2.07826	down	0.018427	0.373103	yes	chr17	67945409	67975958	+	7	circRNA	ENST00000321892	BPTF	chr17:67944372-67945408|chr17:67975958-67982251	bromodomain PHD finger transcription factor [Source:HGNC Symbol;Acc:HGNC:3581]
circRNA19930	0	0	0	0	0	0	0	170.967	39.7211	42.0693	0	13.9215	-inf	down	0.01852	0.374473	yes	chr17	17176426	17180088	+	3	circRNA	ENST00000395811	MPRIP	chr17:17175412-17176425|chr17:17180088-17184822	myosin phosphatase Rho interacting protein [Source:HGNC Symbol;Acc:HGNC:30321]
circRNA918	111.113	116.324	38.7908	111.672	141.324	93.3438	371.624	621.699	291.288	452.246	394.775	389.802	-2.0413	down	0.018583	0.375235	yes	chr16	68121987	68123121	+	1	circRNA	ENST00000553077	NFATC3	chr16:68085180-68121986|chr16:68123121-68126447	nuclear factor of activated T-cells 3 [Source:HGNC Symbol;Acc:HGNC:7777]
circRNA12443	0	0	0	27.9181	0	0	15.4843	62.1699	39.7211	73.6214	102.985	97.4504	-3.80949	down	0.018629	0.375651	yes	chr9	121974009	121989770	-	3	circRNA	ENST00000321582	TTLL11	chr9:121870748-121974008|chr9:121989770-122031722	tubulin tyrosine ligase like 11 [Source:HGNC Symbol;Acc:HGNC:18113]
circRNA20154	0	0	0	0	0	0	0	93.2549	26.4807	31.552	0	83.5289	-inf	down	0.018656	0.375684	yes	chr16	15732564	15745237	-	8	circRNA	ENST00000396324	MYH11	chr16:15727054-15732563|chr16:15745237-15747569	myosin heavy chain 11 [Source:HGNC Symbol;Acc:HGNC:7569]
circRNA23342	0	0	0	0	0	0	0	108.797	26.4807	21.0347	34.3283	41.7645	-inf	down	0.018852	0.379115	yes	chr9	134052306	134053590	-	2	circRNA	ENST00000303407	BRD3	chr9:134051709-134052305|chr9:134053590-134067944	bromodomain containing 3 [Source:HGNC Symbol;Acc:HGNC:1104]
circRNA23290	0	0	0	0	0	0	0	62.1699	13.2404	21.0347	85.8206	55.686	-inf	down	0.018935	0.380267	yes	chr9	121860337	121870748	-	2	circRNA	ENST00000321582	TTLL11	chr9:121822879-121860336|chr9:121870748-121974008	tubulin tyrosine ligase like 11 [Source:HGNC Symbol;Acc:HGNC:18113]
circRNA254	41.6672	25.8498	245.675	55.8361	62.8106	40.0045	15.4843	15.5425	0	21.0347	137.313	27.843	1.11917	up	0.019137	0.383324	yes	chr12	69251129	69262562	+	8	circRNA	ENST00000435070	CPSF6	chr12:69239706-69251128|chr12:69262562-69269511	cleavage and polyadenylation specific factor 6 [Source:HGNC Symbol;Acc:HGNC:13871]
circRNA22175	0	0	0	0	0	0	0	31.085	26.4807	94.656	102.985	0	-inf	down	0.019139	0.383324	yes	chr3	128896436	128897710	+	2	circRNA	ENST00000514643	ACAD9	chr3:128895416-128896435|chr3:128897710-128899286	acyl-CoA dehydrogenase family member 9 [Source:HGNC Symbol;Acc:HGNC:21497]
circRNA6983	0	38.7747	38.7908	41.8771	0	0	30.9686	186.51	185.365	94.656	188.805	125.293	-2.76445	down	0.019207	0.383707	yes	chr2	109564366	109593119	-	7	circRNA	ENST00000356688	SEPT10	chr2:109553219-109564365|chr2:109593119-109613797	septin 10 [Source:HGNC Symbol;Acc:HGNC:14349]
circRNA17735	0	0	0	0	0	0	30.9686	108.797	0	0	188.805	0	-inf	down	0.01921	0.383707	yes	chr5	88749070	88761328	-	3	circRNA	ENST00000504921	MEF2C	chr5:88731901-88749069|chr5:88761328-88804597	myocyte enhancer factor 2C [Source:HGNC Symbol;Acc:HGNC:6996]
circRNA17519	0	0	0	0	0	0	30.9686	46.6274	39.7211	31.552	34.3283	13.9215	-inf	down	0.019306	0.385105	yes	chr6	42573734	42594304	+	3	circRNA	ENST00000372903	UBR2	chr6:42564397-42573733|chr6:42594304-42603587	ubiquitin protein ligase E3 component n-recognin 2 [Source:HGNC Symbol;Acc:HGNC:21289]
circRNA20633	0	0	0	0	0	0	0	31.085	13.2404	52.5867	120.149	27.843	-inf	down	0.019338	0.385224	yes	chr14	90943078	90978524	-	3	circRNA	ENST00000614987	RPS6KA5	chr14:90923196-90943077|chr14:90978524-91001087	ribosomal protein S6 kinase A5 [Source:HGNC Symbol;Acc:HGNC:10434]
circRNA8357	0	0	12.9303	0	0	0	77.4216	31.085	66.2018	73.6214	85.8206	0	-4.69167	down	0.019442	0.386776	yes	chr11	102362896	102368548	+	3	circRNA	ENST00000530675	BIRC2	chr11:102350943-102362895|chr11:102368548-102377495	baculoviral IAP repeat containing 2 [Source:HGNC Symbol;Acc:HGNC:590]
circRNA7789	0	12.9249	38.7908	13.959	0	26.6697	0	155.425	251.567	210.347	0	167.058	-3.08649	down	0.019884	0.394898	yes	chr8	42957094	42964474	+	3	circRNA	ENST00000307602	HOOK3	chr8:42950455-42957093|chr8:42964474-42966472	hook microtubule tethering protein 3 [Source:HGNC Symbol;Acc:HGNC:23576]
circRNA21848	0	0	0	0	0	0	0	77.7124	39.7211	0	17.1641	111.372	-inf	down	0.019927	0.394898	yes	chr4	88043233	88043457	+	1	circRNA	ENST00000237596	PKD2	chr4:88038501-88043232|chr4:88043457-88046641	polycystin 2, transient receptor potential cation channel [Source:HGNC Symbol;Acc:HGNC:9009]
circRNA6056	0	25.8498	129.303	55.8361	47.1079	66.6741	0	0	39.7211	10.5173	68.6565	13.9215	1.28999	up	0.019933	0.394898	yes	chr6	136388393	136389517	-	2	circRNA	ENST00000617204	MAP7	chr6:136383781-136388392|chr6:136389517-136411619	microtubule associated protein 7 [Source:HGNC Symbol;Acc:HGNC:6869]
circRNA10388	0	0	38.7908	0	0	26.6697	0	46.6274	66.2018	105.173	326.118	167.058	-3.44152	down	0.019957	0.394898	yes	chr2	239156652	239163923	-	2	circRNA	ENST00000345617	HDAC4	chr2:239144714-239156651|chr2:239163923-239176412	histone deacetylase 4 [Source:HGNC Symbol;Acc:HGNC:14063]
circRNA17888	0	0	0	0	0	0	15.4843	124.34	52.9614	10.5173	0	27.843	-inf	down	0.019998	0.395181	yes	chr4	107944970	107947537	+	2	circRNA	ENST00000332884	CYP2U1	chr4:107932133-107944969|chr4:107947537-107949349	cytochrome P450 family 2 subfamily U member 1 [Source:HGNC Symbol;Acc:HGNC:20582]
circRNA5607	0	12.9249	51.7211	0	0	0	77.4216	46.6274	79.4422	94.656	326.118	27.843	-3.33448	down	0.020213	0.398897	yes	chr20	36687492	36688784	-	2	circRNA	ENST00000373803	NDRG3	chr20:36684475-36687491|chr20:36688784-36706971	NDRG family member 3 [Source:HGNC Symbol;Acc:HGNC:14462]
circRNA21228	0	0	0	0	0	0	0	15.5425	92.6825	21.0347	34.3283	55.686	-inf	down	0.020267	0.399371	yes	chr7	84046324	84060558	-	2	circRNA	ENST00000265362	SEMA3A	chr7:84014351-84046323|chr7:84060558-84110469	semaphorin 3A [Source:HGNC Symbol;Acc:HGNC:10723]
circRNA7088	0	12.9249	0	0	0	0	0	139.882	26.4807	52.5867	85.8206	41.7645	-4.74477	down	0.020291	0.399371	yes	chr2	200439122	200440784	+	2	circRNA	ENST00000409718	SPATS2L	chr2:200419496-200439121|chr2:200440784-200459768	spermatogenesis associated serine rich 2 like [Source:HGNC Symbol;Acc:HGNC:24574]
circRNA12773	0	0	0	0	15.7026	66.6741	30.9686	93.2549	105.923	63.104	51.4924	222.744	-2.78428	down	0.020351	0.399647	yes	chr11	120476661	120477526	+	3	circRNA	ENST00000356641	ARHGEF12	chr11:120475507-120476660|chr11:120477526-120478155	Rho guanine nucleotide exchange factor 12 [Source:HGNC Symbol;Acc:HGNC:14193]
circRNA7670	0	12.9249	12.9303	0	15.7026	0	30.9686	217.595	158.884	42.0693	51.4924	27.843	-3.66967	down	0.020371	0.399647	yes	chr9	100498765	100516771	+	4	circRNA	ENST00000502978	MSANTD3-TMEFF1	chr9:100442356-100498764|chr9:100516771-100547743	MSANTD3-TMEFF1 readthrough [Source:HGNC Symbol;Acc:HGNC:38838]
circRNA11532	0	0	0	13.959	0	0	92.9059	0	0	115.691	34.3283	111.372	-4.66569	down	0.020386	0.399647	yes	chr18	6263947	6312056	-	4	circRNA	ENST00000400105	L3MBTL4	chr18:6244588-6263946|chr18:6312056-6367613	L3MBTL4, histone methyl-lysine binding protein [Source:HGNC Symbol;Acc:HGNC:26677]
circRNA18303	0	0	0	0	0	0	30.9686	46.6274	0	42.0693	17.1641	69.6074	-inf	down	0.020495	0.400985	yes	chr2	166472317	166477710	-	4	circRNA	ENST00000409855	SCN7A	chr2:166470706-166472316|chr2:166477710-166486855	sodium voltage-gated channel alpha subunit 7 [Source:HGNC Symbol;Acc:HGNC:10594]
circRNA18735	0	0	0	0	0	0	46.453	46.6274	0	31.552	85.8206	13.9215	-inf	down	0.02053	0.400985	yes	chr9	111533739	111534353	+	2	circRNA	ENST00000358151	ZNF483	chr9:111530963-111533738|chr9:111534353-111576364	zinc finger protein 483 [Source:HGNC Symbol;Acc:HGNC:23384]
circRNA26672	0	0	0	0	0	0	0	0	66.2018	63.104	34.3283	55.686	-inf	down	0.02063	0.400985	yes	chr9	125915686	125935607	+	3	circRNA	ENST00000342287	PBX3	chr9:125748623-125915685|chr9:125935607-125960683	PBX homeobox 3 [Source:HGNC Symbol;Acc:HGNC:8634]
circRNA21358	0	0	0	0	0	0	0	93.2549	13.2404	42.0693	17.1641	55.686	-inf	down	0.020649	0.400985	yes	chr6	17539269	17543143	+	4	circRNA	ENST00000229922	CAP2	chr6:17513954-17539268|chr6:17543143-17551463	cyclase associated actin cytoskeleton regulatory protein 2 [Source:HGNC Symbol;Acc:HGNC:20039]
circRNA4636	0	25.8498	12.9303	55.8361	0	13.3348	0	0	0	0	0	0	inf	up	0.020651	0.400985	yes	chr17	58357468	58358823	-	1	circRNA	ENST00000407977	RNF43	chr17:58354986-58357467|chr17:58358823-58360148	ring finger protein 43 [Source:HGNC Symbol;Acc:HGNC:18505]
circRNA2207	13.8891	25.8498	38.7908	0	15.7026	53.3393	0	15.5425	0	0	0	0	3.24713	up	0.020654	0.400985	yes	chr4	6923373	6924111	+	1	circRNA	ENST00000448507	TBC1D14	chr4:6909505-6923372|chr4:6924111-6967303	TBC1 domain family member 14 [Source:HGNC Symbol;Acc:HGNC:29246]
circRNA2993	27.7781	38.7747	0	13.959	47.1079	66.6741	15.4843	295.307	317.769	105.173	377.611	194.901	-2.74911	down	0.02067	0.400985	yes	chr1	28742403	28743986	+	1	circRNA	ENST00000542507	YTHDF2	chr1:28738338-28742402|chr1:28743986-28768928	YTH N6-methyladenosine RNA binding protein 2 [Source:HGNC Symbol;Acc:HGNC:31675]
circRNA2566	27.7781	0	12.9303	0	31.4053	13.3348	77.4216	108.797	92.6825	94.656	154.477	125.293	-2.93468	down	0.020671	0.400985	yes	chr3	179413412	179419505	-	5	circRNA	ENST00000232564	GNB4	chr3:179405406-179413411|chr3:179419505-179420888	G protein subunit beta 4 [Source:HGNC Symbol;Acc:HGNC:20731]
circRNA19180	0	0	0	0	0	0	0	31.085	52.9614	42.0693	34.3283	41.7645	-inf	down	0.0207	0.401022	yes	chr12	26628033	26716242	-	18	circRNA	ENST00000381340	ITPR2	chr12:26624356-26628032|chr12:26716242-26722396	inositol 1,4,5-trisphosphate receptor type 2 [Source:HGNC Symbol;Acc:HGNC:6181]
circRNA11663	0	0	0	27.9181	15.7026	0	154.843	77.7124	26.4807	52.5867	120.149	55.686	-3.48219	down	0.020752	0.401504	yes	chr7	33349068	33388144	+	7	circRNA	ENST00000242067	BBS9	chr7:33344634-33349067|chr7:33388144-33505462	Bardet-Biedl syndrome 9 [Source:HGNC Symbol;Acc:HGNC:30000]
circRNA19485	0	0	0	0	0	0	0	15.5425	132.404	0	120.149	13.9215	-inf	down	0.020803	0.401557	yes	chr11	34882676	34888869	-	4	circRNA	ENST00000532428	APIP	chr11:34875283-34882675|chr11:34888869-34890503	APAF1 interacting protein [Source:HGNC Symbol;Acc:HGNC:17581]
circRNA19167	0	0	0	0	0	0	0	62.1699	26.4807	42.0693	34.3283	41.7645	-inf	down	0.020809	0.401557	yes	chr12	20621296	20654205	+	11	circRNA	ENST00000359062	PDE3A	chr12:20616384-20621295|chr12:20654205-20680029	phosphodiesterase 3A [Source:HGNC Symbol;Acc:HGNC:8778]
circRNA3599	27.7781	103.399	129.303	13.959	15.7026	93.3438	15.4843	46.6274	26.4807	10.5173	0	41.7645	1.44476	up	0.020851	0.401843	yes	chr8	123337625	123339446	-	2	circRNA	ENST00000517666	ATAD2	chr8:123336532-123337624|chr8:123339446-123344883	ATPase family, AAA domain containing 2 [Source:HGNC Symbol;Acc:HGNC:30123]
circRNA22244	0	0	0	0	0	0	0	77.7124	52.9614	0	85.8206	27.843	-inf	down	0.021008	0.404087	yes	chr3	179413412	179426242	-	7	circRNA	ENST00000232564	GNB4	chr3:179405406-179413411|chr3:179426242-179451345	G protein subunit beta 4 [Source:HGNC Symbol;Acc:HGNC:20731]
circRNA20982	0	0	0	0	0	0	0	77.7124	52.9614	21.0347	34.3283	27.843	-inf	down	0.021022	0.404087	yes	chr22	50125392	50128507	+	3	circRNA	ENST00000545383	MOV10L1	chr22:50120616-50125391|chr22:50128507-50134006	Mov10 RISC complex RNA helicase like 1 [Source:HGNC Symbol;Acc:HGNC:7201]
circRNA12775	0	0	0	0	15.7026	0	15.4843	93.2549	52.9614	42.0693	51.4924	69.6074	-4.37078	down	0.021153	0.40559	yes	chr11	122776219	122777210	+	2	circRNA	ENST00000284273	UBASH3B	chr11:122656210-122776218|chr11:122777210-122779496	ubiquitin associated and SH3 domain containing B [Source:HGNC Symbol;Acc:HGNC:29884]
circRNA11590	0	0	0	13.959	0	13.3348	15.4843	31.085	79.4422	105.173	171.641	41.7645	-4.02583	down	0.021155	0.40559	yes	chr20	25496663	25498346	-	2	circRNA	ENST00000278886	NINL	chr20:25491525-25496662|chr20:25498346-25500839	ninein like [Source:HGNC Symbol;Acc:HGNC:29163]
circRNA3645	0	38.7747	12.9303	0	31.4053	26.6697	0	0	0	0	0	0	inf	up	0.021185	0.405639	yes	chrX	19683823	19695741	-	2	circRNA	ENST00000397821	SH3KBP1	chrX:19645475-19683822|chrX:19695741-19706880	SH3 domain containing kinase binding protein 1 [Source:HGNC Symbol;Acc:HGNC:13867]
circRNA7377	0	38.7747	12.9303	41.8771	0	13.3348	0	0	0	0	0	0	inf	up	0.021253	0.406416	yes	chr1	119755427	119759989	-	4	circRNA	ENST00000369406	HMGCS2	chr1:119753386-119755426|chr1:119759989-119764171	3-hydroxy-3-methylglutaryl-CoA synthase 2 [Source:HGNC Symbol;Acc:HGNC:5008]
circRNA316	13.8891	64.6245	25.8605	69.7952	15.7026	0	15.4843	15.5425	0	0	0	0	2.61344	up	0.021422	0.408409	yes	chr12	122577672	122580670	+	3	circRNA	ENST00000333479	KNTC1	chr12:122577029-122577671|chr12:122580670-122582704	kinetochore associated 1 [Source:HGNC Symbol;Acc:HGNC:17255]
circRNA2463	125.002	64.6245	310.327	223.345	172.729	133.348	588.404	606.157	556.095	410.176	703.729	779.603	-1.82382	down	0.021424	0.408409	yes	chr3	71041328	71053773	-	4	circRNA	ENST00000318789	FOXP1	chr3:71015653-71041327|chr3:71053773-71112535	forkhead box P1 [Source:HGNC Symbol;Acc:HGNC:3823]
circRNA1395	55.5563	129.249	103.442	83.7542	47.1079	133.348	247.749	621.699	383.97	315.52	274.626	473.331	-2.06826	down	0.02144	0.408409	yes	chr22	20933779	20934244	+	1	circRNA	ENST00000354336	CRKL	chr22:20918245-20933778|chr22:20934244-20949710	CRK like proto-oncogene, adaptor protein [Source:HGNC Symbol;Acc:HGNC:2363]
circRNA13352	0	0	0	0	94.2159	0	0	248.68	79.4422	73.6214	34.3283	167.058	-2.67843	down	0.021504	0.409101	yes	chr7	28488175	28507737	+	3	circRNA	ENST00000469531	CREB5	chr7:28409423-28488174|chr7:28507737-28513463	cAMP responsive element binding protein 5 [Source:HGNC Symbol;Acc:HGNC:16844]
circRNA11789	0	0	0	13.959	0	0	77.4216	62.1699	79.4422	52.5867	51.4924	0	-4.53277	down	0.021568	0.409286	yes	chr6	104833042	104849246	-	3	circRNA	ENST00000262903	HACE1	chr6:104811393-104833041|chr6:104849246-104850906	HECT domain and ankyrin repeat containing E3 ubiquitin protein ligase 1 [Source:HGNC Symbol;Acc:HGNC:21033]
circRNA20014	0	0	0	0	0	0	0	46.6274	79.4422	21.0347	34.3283	27.843	-inf	down	0.021569	0.409286	yes	chr17	46963697	46965039	+	1	circRNA	ENST00000640792	GOSR2	chr17:46938704-46963696|chr17:46965039-46966533	golgi SNAP receptor complex member 2 [Source:HGNC Symbol;Acc:HGNC:4431]
circRNA9358	0	0	12.9303	0	0	0	0	93.2549	79.4422	31.552	68.6565	55.686	-4.66747	down	0.021638	0.409791	yes	chr7	152263016	152315338	-	6	circRNA	ENST00000262189	KMT2C	chr7:152252715-152263015|chr7:152315338-152330600	lysine methyltransferase 2C [Source:HGNC Symbol;Acc:HGNC:13726]
circRNA6936	0	25.8498	0	0	0	0	30.9686	77.7124	79.4422	52.5867	51.4924	55.686	-3.7504	down	0.021651	0.409791	yes	chr2	70179532	70181997	-	2	circRNA	ENST00000264434	C2orf42	chr2:70175777-70179531|chr2:70181997-70182666	chromosome 2 open reading frame 42 [Source:HGNC Symbol;Acc:HGNC:26056]
circRNA3213	55.5563	25.8498	0	0	0	53.3393	185.812	155.425	66.2018	73.6214	171.641	125.293	-2.52952	down	0.021774	0.411593	yes	chr1	171568247	171575128	+	3	circRNA	ENST00000367742	PRRC2C	chr1:171566843-171568246|chr1:171575128-171577433	proline rich coiled-coil 2C [Source:HGNC Symbol;Acc:HGNC:24903]
circRNA18778	0	0	0	0	0	0	77.4216	31.085	13.2404	21.0347	0	55.686	-inf	down	0.021931	0.414032	yes	chr8	17989859	17993619	+	3	circRNA	ENST00000325083	PCM1	chr8:17986087-17989858|chr8:17993619-18006262	pericentriolar material 1 [Source:HGNC Symbol;Acc:HGNC:8727]
circRNA22266	0	0	0	0	0	0	0	46.6274	92.6825	0	68.6565	27.843	-inf	down	0.021961	0.41407	yes	chr3	188341663	188406313	+	2	circRNA	ENST00000448637	LPP	chr3:188153363-188341662|chr3:188406313-188484591	LIM domain containing preferred translocation partner in lipoma [Source:HGNC Symbol;Acc:HGNC:6679]
circRNA16614	0	0	0	0	0	0	46.453	77.7124	39.7211	42.0693	0	0	-inf	down	0.02216	0.41729	yes	chr10	102872448	102874661	+	3	circRNA	ENST00000299353	BORCS7-ASMT	chr10:102870211-102872447|chr10:102874661-102876953	BORCS7-ASMT readthrough (NMD candidate) [Source:HGNC Symbol;Acc:HGNC:49183]
circRNA6475	0	12.9249	0	0	0	13.3348	61.9373	170.967	79.4422	21.0347	34.3283	41.7645	-3.96285	down	0.022217	0.417538	yes	chr4	109462901	109463644	+	1	circRNA	ENST00000504968	SEC24B	chr4:109449509-109462900|chr4:109463644-109473003	SEC24 homolog B, COPII coat complex component [Source:HGNC Symbol;Acc:HGNC:10704]
circRNA3363	41.6672	12.9249	12.9303	0	0	0	61.9373	155.425	52.9614	73.6214	188.805	69.6074	-3.15718	down	0.022254	0.417538	yes	chr9	83768818	83788678	-	4	circRNA	ENST00000376371	GKAP1	chr9:83753359-83768817|chr9:83788678-83799184	G kinase anchoring protein 1 [Source:HGNC Symbol;Acc:HGNC:17496]
circRNA18057	0	0	0	0	0	0	46.453	0	26.4807	31.552	154.477	0	-inf	down	0.022286	0.417538	yes	chr3	123647224	123649194	-	3	circRNA	ENST00000360772	MYLK	chr3:123640504-123647223|chr3:123649194-123657125	myosin light chain kinase [Source:HGNC Symbol;Acc:HGNC:7590]
circRNA4502	0	25.8498	0	13.959	31.4053	40.0045	46.453	170.967	145.644	136.725	188.805	83.5289	-2.79543	down	0.022286	0.417538	yes	chr17	4066447	4072756	-	4	circRNA	ENST00000381638	ZZEF1	chr17:4064829-4066446|chr17:4072756-4074149	zinc finger ZZ-type and EF-hand domain containing 1 [Source:HGNC Symbol;Acc:HGNC:29027]
circRNA7598	0	38.7747	0	41.8771	0	40.0045	185.812	93.2549	132.404	136.725	51.4924	153.136	-2.64141	down	0.022388	0.41823	yes	chr9	33948374	33956146	-	3	circRNA	ENST00000379238	UBAP2	chr9:33944639-33948373|chr9:33956146-33960825	ubiquitin associated protein 2 [Source:HGNC Symbol;Acc:HGNC:14185]
circRNA26259	0	0	0	0	0	0	0	0	52.9614	21.0347	137.313	41.7645	-inf	down	0.022439	0.41823	yes	chr1	23417249	23419139	-	3	circRNA	ENST00000450454	TCEA3	chr1:23408726-23417248|chr1:23419139-23424564	transcription elongation factor A3 [Source:HGNC Symbol;Acc:HGNC:11615]
circRNA9891	0	0	12.9303	0	15.7026	13.3348	0	108.797	79.4422	42.0693	274.626	69.6074	-3.77506	down	0.022443	0.41823	yes	chr3	27437388	27448797	-	2	circRNA	ENST00000425128	SLC4A7	chr3:27436548-27437387|chr3:27448797-27452416	solute carrier family 4 member 7 [Source:HGNC Symbol;Acc:HGNC:11033]
circRNA8452	0	0	12.9303	0	31.4053	0	0	93.2549	79.4422	105.173	120.149	83.5289	-3.44114	down	0.022467	0.41823	yes	chr10	70844473	70859499	+	5	circRNA	ENST00000373202	SGPL1	chr10:70816880-70844472|chr10:70859499-70868344	sphingosine-1-phosphate lyase 1 [Source:HGNC Symbol;Acc:HGNC:10817]
circRNA21576	0	0	0	0	0	0	0	155.425	13.2404	31.552	68.6565	0	-inf	down	0.022475	0.41823	yes	chr5	37238857	37239869	-	2	circRNA	ENST00000508244	C5orf42	chr5:37231049-37238856|chr5:37239869-37243012	chromosome 5 open reading frame 42 [Source:HGNC Symbol;Acc:HGNC:25801]
circRNA18758	0	0	0	0	0	0	46.453	46.6274	26.4807	10.5173	34.3283	27.843	-inf	down	0.022506	0.41823	yes	chr9	129927195	129929695	-	2	circRNA	ENST00000446176	FNBP1	chr9:129925157-129927194|chr9:129929695-129957359	formin binding protein 1 [Source:HGNC Symbol;Acc:HGNC:17069]
circRNA22695	0	0	0	0	0	0	0	46.6274	13.2404	42.0693	68.6565	41.7645	-inf	down	0.022533	0.41823	yes	chr1	9931891	9935627	-	4	circRNA	ENST00000377223	LZIC	chr1:9930457-9931890|chr1:9935627-9936518	leucine zipper and CTNNBIP1 domain containing [Source:HGNC Symbol;Acc:HGNC:17497]
circRNA5695	0	129.249	0	41.8771	15.7026	0	46.453	217.595	79.4422	136.725	223.134	153.136	-2.19671	down	0.022549	0.41823	yes	chr20	62139075	62140944	-	3	circRNA	ENST00000370873	PSMA7	chr20:62138290-62139074|chr20:62140944-62143207	proteasome subunit alpha 7 [Source:HGNC Symbol;Acc:HGNC:9536]
circRNA13088	0	0	0	0	15.7026	0	30.9686	46.6274	52.9614	31.552	102.985	41.7645	-4.2885	down	0.022598	0.418409	yes	chr14	30955620	30956242	-	2	circRNA	ENST00000355683	STRN3	chr14:30950944-30955619|chr14:30956242-31025903	striatin 3 [Source:HGNC Symbol;Acc:HGNC:15720]
circRNA18517	0	0	0	0	0	0	108.39	15.5425	0	31.552	51.4924	13.9215	-inf	down	0.022635	0.418409	yes	chr1	91375358	91385834	-	9	circRNA	ENST00000370425	HFM1	chr1:91353299-91375357|chr1:91385834-91394092	HFM1, ATP dependent DNA helicase homolog [Source:HGNC Symbol;Acc:HGNC:20193]
circRNA20477	0	0	0	0	0	0	0	202.052	39.7211	0	0	41.7645	-inf	down	0.022654	0.418409	yes	chr15	84538532	84546277	-	4	circRNA	ENST00000354771	UBE2Q2P1	chr15:84534238-84538531|chr15:84546277-84554960	ubiquitin conjugating enzyme E2 Q2 pseudogene 1 [Source:HGNC Symbol;Acc:HGNC:37439]
circRNA6836	0	12.9249	12.9303	0	0	0	46.453	62.1699	52.9614	52.5867	85.8206	83.5289	-3.89078	down	0.022693	0.418409	yes	chr2	27599583	27601442	+	4	circRNA	ENST00000413371	ZNF512	chr2:27598254-27599582|chr2:27601442-27602462	zinc finger protein 512 [Source:HGNC Symbol;Acc:HGNC:29380]
circRNA750	13.8891	12.9249	0	27.9181	31.4053	26.6697	0	139.882	132.404	178.795	205.97	222.744	-2.96331	down	0.0227	0.418409	yes	chr17	49311312	49312845	-	3	circRNA	ENST00000508237	ZNF652	chr17:49298924-49311311|chr17:49312845-49317365	zinc finger protein 652 [Source:HGNC Symbol;Acc:HGNC:29147]
circRNA2859	27.7781	25.8498	0	0	0	13.3348	46.453	108.797	52.9614	52.5867	171.641	180.979	-3.19544	down	0.022922	0.421976	yes	chr2	202952559	202961426	+	4	circRNA	ENST00000402905	CARF	chr2:202942967-202952558|chr2:202961426-202966977	calcium responsive transcription factor [Source:HGNC Symbol;Acc:HGNC:14435]
circRNA5149	0	77.5494	51.7211	0	0	0	123.875	217.595	39.7211	73.6214	291.79	69.6074	-2.65855	down	0.023014	0.422475	yes	chr14	39276934	39279537	+	3	circRNA	ENST00000553728	CTAGE5	chr14:39253171-39276933|chr14:39279537-39291018	CTAGE family member 5, ER export factor [Source:HGNC Symbol;Acc:HGNC:7057]
circRNA20761	0	0	0	0	0	0	0	62.1699	119.163	10.5173	51.4924	0	-inf	down	0.023073	0.422475	yes	chr19	45280374	45280734	+	2	circRNA	ENST00000262891	MARK4	chr19:45278615-45280373|chr19:45280734-45287446	microtubule affinity regulating kinase 4 [Source:HGNC Symbol;Acc:HGNC:13538]
circRNA17212	0	0	0	0	0	0	30.9686	31.085	39.7211	0	17.1641	83.5289	-inf	down	0.023077	0.422475	yes	chr18	58934433	58939621	+	2	circRNA	ENST00000336078	ZNF532	chr18:58920633-58934432|chr18:58939621-58948066	zinc finger protein 532 [Source:HGNC Symbol;Acc:HGNC:30940]
circRNA5364	0	12.9249	25.8605	13.959	15.7026	26.6697	0	0	0	0	0	0	inf	up	0.023098	0.422475	yes	chr19	44780905	44781363	+	2	circRNA	ENST00000270279	CBLC	chr19:44778284-44780904|chr19:44781363-44782369	Cbl proto-oncogene C [Source:HGNC Symbol;Acc:HGNC:15961]
circRNA27370	0	0	0	0	0	0	0	0	0	84.1387	102.985	69.6074	-inf	down	0.023099	0.422475	yes	chr10	77586317	77587871	-	2	circRNA	ENST00000638506	KCNMA1	chr10:77404023-77586316|chr10:77587871-77637264	potassium calcium-activated channel subfamily M alpha 1 [Source:HGNC Symbol;Acc:HGNC:6284]
circRNA1875	55.5563	38.7747	0	13.959	0	13.3348	0	341.935	198.605	115.691	188.805	97.4504	-2.95403	down	0.023123	0.422475	yes	chr6	42974003	42975038	-	2	circRNA	ENST00000304611	PEX6	chr6:42969987-42974002|chr6:42975038-42978268	peroxisomal biogenesis factor 6 [Source:HGNC Symbol;Acc:HGNC:8859]
circRNA2489	41.6672	0	12.9303	13.959	47.1079	0	108.39	93.2549	66.2018	94.656	257.462	139.215	-2.7145	down	0.023178	0.422475	yes	chr3	119863419	119905852	-	3	circRNA	ENST00000264235	GSK3B	chr3:119843353-119863418|chr3:119905852-119912703	glycogen synthase kinase 3 beta [Source:HGNC Symbol;Acc:HGNC:4617]
circRNA22690	0	0	0	0	0	0	0	15.5425	39.7211	63.104	85.8206	13.9215	-inf	down	0.02319	0.422475	yes	chr1	7835762	7837149	+	2	circRNA	ENST00000613533	PER3	chr1:7830161-7835761|chr1:7837149-7842671	period circadian clock 3 [Source:HGNC Symbol;Acc:HGNC:8847]
circRNA23923	0	0	0	0	0	0	0	0	119.163	31.552	51.4924	27.843	-inf	down	0.023206	0.422475	yes	chr11	20080064	20083179	+	2	circRNA	ENST00000360655	NAV2	chr11:20078104-20080063|chr11:20083179-20090864	neuron navigator 2 [Source:HGNC Symbol;Acc:HGNC:15997]
circRNA17159	0	0	0	0	0	0	30.9686	77.7124	13.2404	10.5173	68.6565	13.9215	-inf	down	0.023252	0.422637	yes	chr18	196637	204692	+	7	circRNA	ENST00000582707	USP14	chr18:192900-196636|chr18:204692-209970	ubiquitin specific peptidase 14 [Source:HGNC Symbol;Acc:HGNC:12612]
circRNA13676	0	0	0	0	62.8106	0	30.9686	46.6274	66.2018	52.5867	154.477	83.5289	-2.78991	down	0.023285	0.422637	yes	chr3	52412811	52414587	+	3	circRNA	ENST00000327906	PHF7	chr3:52411247-52412810|chr3:52414587-52419832	PHD finger protein 7 [Source:HGNC Symbol;Acc:HGNC:18458]
circRNA9996	0	0	12.9303	0	0	0	46.453	0	132.404	63.104	102.985	0	-4.73754	down	0.02333	0.422637	yes	chr3	119503532	119504021	+	2	circRNA	ENST00000494664	TIMMDC1	chr3:119500860-119503531|chr3:119504021-119513640	translocase of inner mitochondrial membrane domain containing 1 [Source:HGNC Symbol;Acc:HGNC:1321]
circRNA817	55.5563	38.7747	0	0	0	13.3348	92.9059	310.85	66.2018	63.104	154.477	55.686	-2.78724	down	0.023366	0.422637	yes	chr16	98145	100509	-	2	circRNA	ENST00000620134	NPRL3	chr16:93325-98144|chr16:100509-110524	NPR3 like, GATOR1 complex subunit [Source:HGNC Symbol;Acc:HGNC:14124]
circRNA135	83.3344	0	0	13.959	62.8106	186.688	0	31.085	0	31.552	0	0	2.46898	up	0.023457	0.422637	yes	chr13	95723242	95725252	+	2	circRNA	ENST00000602402	DNAJC3	chr13:95709337-95723241|chr13:95725252-95757643	DnaJ heat shock protein family (Hsp40) member C3 [Source:HGNC Symbol;Acc:HGNC:9439]
circRNA9268	0	0	12.9303	0	0	0	15.4843	77.7124	79.4422	52.5867	68.6565	13.9215	-4.57319	down	0.023466	0.422637	yes	chr7	50669722	50705323	-	4	circRNA	ENST00000406641	GRB10	chr7:50626978-50669721|chr7:50705323-50755886	growth factor receptor bound protein 10 [Source:HGNC Symbol;Acc:HGNC:4564]
circRNA23321	0	0	0	0	0	0	0	77.7124	26.4807	10.5173	85.8206	27.843	-inf	down	0.023467	0.422637	yes	chr9	129957360	129994958	-	5	circRNA	ENST00000446176	FNBP1	chr9:129929695-129957359|chr9:129994958-130042951	formin binding protein 1 [Source:HGNC Symbol;Acc:HGNC:17069]
circRNA1189	13.8891	12.9249	0	0	0	26.6697	15.4843	124.34	52.9614	136.725	171.641	83.5289	-3.45048	down	0.023476	0.422637	yes	chr14	67761366	67762819	-	3	circRNA	ENST00000394455	ZFYVE26	chr14:67756145-67761365|chr14:67762819-67766226	zinc finger FYVE-type containing 26 [Source:HGNC Symbol;Acc:HGNC:20761]
circRNA5068	0	129.249	181.024	27.9181	62.8106	26.6697	0	46.6274	79.4422	63.104	0	0	1.17679	up	0.023483	0.422637	yes	chr15	85113873	85115487	+	2	circRNA	ENST00000310298	PDE8A	chr15:85113447-85113872|chr15:85115487-85115983	phosphodiesterase 8A [Source:HGNC Symbol;Acc:HGNC:8793]
circRNA18543	0	0	0	0	0	0	15.4843	31.085	66.2018	0	102.985	13.9215	-inf	down	0.023506	0.422637	yes	chr1	117460489	117502970	+	6	circRNA	ENST00000356554	MAN1A2	chr1:117442325-117460488|chr1:117502970-117522824	mannosidase alpha class 1A member 2 [Source:HGNC Symbol;Acc:HGNC:6822]
circRNA20915	0	0	0	0	0	0	0	31.085	0	73.6214	0	139.215	-inf	down	0.023529	0.422637	yes	chr22	23273081	23273774	+	2	circRNA	ENST00000305877	BCR	chr22:23271592-23273080|chr22:23273774-23283976	BCR, RhoGEF and GTPase activating protein [Source:HGNC Symbol;Acc:HGNC:1014]
circRNA8847	0	0	12.9303	0	0	0	30.9686	170.967	52.9614	10.5173	85.8206	13.9215	-4.81969	down	0.023566	0.422788	yes	chr14	64521487	64523402	+	1	circRNA	ENST00000358738	ZBTB1	chr14:64504946-64521486|chr14:64523402-64531860	zinc finger and BTB domain containing 1 [Source:HGNC Symbol;Acc:HGNC:20259]
circRNA19326	0	0	0	0	0	0	0	62.1699	26.4807	52.5867	51.4924	13.9215	-inf	down	0.023759	0.425735	yes	chr12	109139397	109140058	+	1	circRNA	ENST00000338432	ACACB	chr12:109116704-109139396|chr12:109140058-109166860	acetyl-CoA carboxylase beta [Source:HGNC Symbol;Acc:HGNC:85]
circRNA19104	0	0	0	0	0	0	0	77.7124	26.4807	105.173	17.1641	0	-inf	down	0.023828	0.426369	yes	chr13	98829307	98846060	-	6	circRNA	ENST00000340449	DOCK9	chr13:98826887-98829306|chr13:98846060-98846519	dedicator of cytokinesis 9 [Source:HGNC Symbol;Acc:HGNC:14132]
circRNA1348	180.558	90.4743	129.303	41.8771	109.918	53.3393	170.328	559.529	344.249	378.624	635.073	417.645	-2.04894	down	0.023852	0.426369	yes	chr18	21765772	21779685	+	5	circRNA	ENST00000578646	MIB1	chr18:21705123-21765771|chr18:21779685-21791334	mindbomb E3 ubiquitin protein ligase 1 [Source:HGNC Symbol;Acc:HGNC:21086]
circRNA19333	0	0	0	0	0	0	0	77.7124	66.2018	10.5173	51.4924	13.9215	-inf	down	0.023917	0.427015	yes	chr12	109249984	109259108	+	7	circRNA	ENST00000338432	ACACB	chr12:109247703-109249983|chr12:109259108-109260479	acetyl-CoA carboxylase beta [Source:HGNC Symbol;Acc:HGNC:85]
circRNA16799	0	0	0	0	0	0	46.453	108.797	0	21.0347	0	41.7645	-inf	down	0.023957	0.427214	yes	chr16	503004	510800	+	3	circRNA	ENST00000262305	RAB11FIP3	chr16:496859-503003|chr16:510800-518942	RAB11 family interacting protein 3 [Source:HGNC Symbol;Acc:HGNC:17224]
circRNA19956	0	0	0	0	0	0	0	108.797	0	21.0347	51.4924	55.686	-inf	down	0.024013	0.427697	yes	chr17	28921688	28924302	-	2	circRNA	ENST00000332830	PHF12	chr17:28919275-28921687|chr17:28924302-28926990	PHD finger protein 12 [Source:HGNC Symbol;Acc:HGNC:20816]
circRNA3627	472.228	853.044	362.048	251.263	157.026	240.027	1068.42	1072.43	966.546	1104.32	1527.61	988.426	-1.52631	down	0.024219	0.430848	yes	chr8	140864312	140890769	-	3	circRNA	ENST00000522684	PTK2	chr8:140846678-140864311|chr8:140890769-140925660	protein tyrosine kinase 2 [Source:HGNC Symbol;Acc:HGNC:9611]
circRNA9851	0	0	12.9303	0	0	0	0	77.7124	39.7211	63.104	154.477	27.843	-4.81058	down	0.024288	0.431557	yes	chr4	155696756	155703993	+	2	circRNA	ENST00000506455	GUCY1A3	chr4:155667419-155696755|chr4:155703993-155708235	guanylate cyclase 1 soluble subunit alpha [Source:HGNC Symbol;Acc:HGNC:4685]
circRNA1725	13.8891	90.4743	0	0	0	26.6697	0	0	0	0	0	0	inf	up	0.024346	0.431746	yes	chr7	100103409	100104154	+	3	circRNA	ENST00000438383	AP4M1	chr7:100101968-100103408|chr7:100104154-100104873	adaptor related protein complex 4 mu 1 subunit [Source:HGNC Symbol;Acc:HGNC:574]
circRNA3239	27.7781	0	0	0	0	13.3348	46.453	155.425	39.7211	84.1387	154.477	27.843	-3.62733	down	0.024357	0.431746	yes	chr1	185214507	185231708	+	3	circRNA	ENST00000367501	SWT1	chr1:185206763-185214506|chr1:185231708-185271322	SWT1, RNA endoribonuclease homolog [Source:HGNC Symbol;Acc:HGNC:16785]
circRNA6567	0	38.7747	38.7908	0	15.7026	13.3348	0	0	0	0	0	0	inf	up	0.024421	0.432363	yes	chr3	12312380	12381491	+	3	circRNA	ENST00000397010	PPARG	chr3:12287675-12312379|chr3:12381491-12392613	peroxisome proliferator activated receptor gamma [Source:HGNC Symbol;Acc:HGNC:9236]
circRNA8612	0	0	77.5816	13.959	31.4053	40.0045	0	155.425	211.846	199.829	171.641	208.822	-2.53979	down	0.024478	0.432854	yes	chr16	17258988	17259498	-	1	circRNA	ENST00000261381	XYLT1	chr16:17200654-17258987|chr16:17259498-17358011	xylosyltransferase 1 [Source:HGNC Symbol;Acc:HGNC:15516]
circRNA16197	0	0	0	0	0	0	30.9686	46.6274	0	42.0693	17.1641	55.686	-inf	down	0.024589	0.433869	yes	chr13	97346804	97357635	+	2	circRNA	ENST00000397601	MBNL2	chr13:97343216-97346803|chr13:97357635-97391321	muscleblind like splicing regulator 2 [Source:HGNC Symbol;Acc:HGNC:16746]
circRNA1356	13.8891	0	12.9303	0	0	13.3348	15.4843	139.882	105.923	73.6214	205.97	27.843	-3.82411	down	0.024594	0.433869	yes	chr18	32111754	32124845	+	4	circRNA	ENST00000261593	RNF138	chr18:32092886-32111753|chr18:32124845-32126692	ring finger protein 138 [Source:HGNC Symbol;Acc:HGNC:17765]
circRNA18793	0	0	0	0	0	0	15.4843	0	0	94.656	137.313	13.9215	-inf	down	0.024647	0.434286	yes	chr8	38788704	38820635	+	2	circRNA	ENST00000519416	TACC1	chr8:38728671-38788703|chr8:38820635-38825310	transforming acidic coiled-coil containing protein 1 [Source:HGNC Symbol;Acc:HGNC:11522]
circRNA1286	27.7781	142.174	12.9303	69.7952	47.1079	53.3393	46.453	575.072	317.769	273.451	326.118	194.901	-2.29566	down	0.024791	0.436304	yes	chr19	18537601	18538436	-	2	circRNA	ENST00000597960	FKBP8	chr19:18533347-18537600|chr19:18538436-18539370	FK506 binding protein 8 [Source:HGNC Symbol;Acc:HGNC:3724]
circRNA23350	0	0	0	0	0	0	0	108.797	0	31.552	68.6565	27.843	-inf	down	0.024976	0.438534	yes	chr9	137564434	137565154	-	2	circRNA	ENST00000479650	DPH7	chr9:137555648-137564433|chr9:137565154-137574207	diphthamide biosynthesis 7 [Source:HGNC Symbol;Acc:HGNC:25199]
circRNA17336	0	0	0	0	0	0	30.9686	0	66.2018	73.6214	34.3283	0	-inf	down	0.024977	0.438534	yes	chr21	39224408	39229436	-	4	circRNA	ENST00000333229	BRWD1	chr21:39218660-39224407|chr21:39229436-39232176	bromodomain and WD repeat domain containing 1 [Source:HGNC Symbol;Acc:HGNC:12760]
circRNA1331	194.447	90.4743	193.954	83.7542	219.837	173.353	294.202	994.719	675.258	567.936	755.222	403.723	-1.94923	down	0.025097	0.440119	yes	chr18	9182382	9221999	+	7	circRNA	ENST00000262126	ANKRD12	chr18:9136965-9182381|chr18:9221999-9254210	ankyrin repeat domain 12 [Source:HGNC Symbol;Acc:HGNC:29135]
circRNA10237	0	0	25.8605	27.9181	0	53.3393	0	0	0	0	0	0	inf	up	0.02531	0.443329	yes	chr2	102657564	102665350	+	2	circRNA	ENST00000233969	SLC9A2	chr2:102620137-102657563|chr2:102665350-102683260	solute carrier family 9 member A2 [Source:HGNC Symbol;Acc:HGNC:11072]
circRNA16483	0	0	0	0	0	0	15.4843	31.085	39.7211	21.0347	51.4924	27.843	-inf	down	0.025364	0.44375	yes	chr11	118754705	118758902	-	5	circRNA	ENST00000620157	DDX6	chr11:118752097-118754704|chr11:118758902-118759921	DEAD-box helicase 6 [Source:HGNC Symbol;Acc:HGNC:2747]
circRNA14604	0	0	0	0	0	13.3348	0	46.6274	52.9614	31.552	51.4924	125.293	-4.52932	down	0.02542	0.443786	yes	chr10	125038997	125133612	-	2	circRNA	ENST00000494626	CTBP2	chr10:125003492-125038996|chr10:125133612-125160318	C-terminal binding protein 2 [Source:HGNC Symbol;Acc:HGNC:2495]
circRNA4179	0	103.399	77.5816	0	31.4053	53.3393	0	0	0	10.5173	68.6565	0	1.74684	up	0.025426	0.443786	yes	chr11	70659828	70661678	-	2	circRNA	ENST00000601538	SHANK2	chr11:70502931-70659827|chr11:70661678-70698687	SH3 and multiple ankyrin repeat domains 2 [Source:HGNC Symbol;Acc:HGNC:14295]
circRNA613	55.5563	180.949	12.9303	27.9181	78.5132	53.3393	108.39	373.019	410.451	336.555	274.626	250.587	-2.09944	down	0.025549	0.444847	yes	chr10	101667886	101676436	-	4	circRNA	ENST00000331272	FBXW4	chr10:101624810-101667885|chr10:101676436-101694380	F-box and WD repeat domain containing 4 [Source:HGNC Symbol;Acc:HGNC:10847]
circRNA22091	0	0	0	0	0	0	0	46.6274	26.4807	10.5173	154.477	13.9215	-inf	down	0.025555	0.444847	yes	chr3	64799465	64809851	+	2	circRNA	ENST00000474768	ADAMTS9-AS2	chr3:64685338-64799464|chr3:64809851-64867167	ADAMTS9 antisense RNA 2 [Source:HGNC Symbol;Acc:HGNC:42435]
circRNA5938	0	25.8498	0	0	31.4053	13.3348	30.9686	108.797	79.4422	105.173	188.805	69.6074	-3.04545	down	0.025577	0.444847	yes	chr7	152220523	152238826	-	9	circRNA	ENST00000262189	KMT2C	chr7:152207428-152220522|chr7:152238826-152247901	lysine methyltransferase 2C [Source:HGNC Symbol;Acc:HGNC:13726]
circRNA1738	27.7781	38.7747	25.8605	0	0	26.6697	123.875	264.222	66.2018	147.243	154.477	69.6074	-2.79352	down	0.025659	0.445261	yes	chr7	105062164	105081797	+	10	circRNA	ENST00000311117	KMT2E	chr7:105041023-105062163|chr7:105081797-105090008	lysine methyltransferase 2E [Source:HGNC Symbol;Acc:HGNC:18541]
circRNA11842	0	0	0	13.959	0	0	15.4843	62.1699	52.9614	73.6214	85.8206	13.9215	-4.4447	down	0.025663	0.445261	yes	chr5	55475299	55491114	-	2	circRNA	ENST00000509667	PLPP1	chr5:55468149-55475298|chr5:55491114-55534571	phospholipid phosphatase 1 [Source:HGNC Symbol;Acc:HGNC:9228]
circRNA24982	0	0	0	0	0	0	0	0	66.2018	0	68.6565	111.372	-inf	down	0.025691	0.445261	yes	chr20	23389946	23403072	-	5	circRNA	ENST00000398425	NAPB	chr20:23381317-23389945|chr20:23403072-23421304	NSF attachment protein beta [Source:HGNC Symbol;Acc:HGNC:15751]
circRNA22764	0	0	0	0	0	0	0	62.1699	39.7211	21.0347	17.1641	55.686	-inf	down	0.0258	0.446627	yes	chr1	23814190	23820593	-	4	circRNA	ENST00000374490	HMGCL	chr1:23810799-23814189|chr1:23820593-23825355	3-hydroxymethyl-3-methylglutaryl-CoA lyase [Source:HGNC Symbol;Acc:HGNC:5005]
circRNA1811	27.7781	0	25.8605	0	0	0	30.9686	155.425	39.7211	84.1387	343.283	27.843	-3.66711	down	0.026053	0.45048	yes	chr7	158911550	158918869	+	4	circRNA	ENST00000407559	WDR60	chr7:158906091-158911549|chr7:158918869-158922376	WD repeat domain 60 [Source:HGNC Symbol;Acc:HGNC:21862]
circRNA20432	0	0	0	0	0	0	0	62.1699	26.4807	0	102.985	41.7645	-inf	down	0.026131	0.451301	yes	chr15	70919050	70984257	+	5	circRNA	ENST00000544974	LRRC49	chr15:70911598-70919049|chr15:70984257-71008378	leucine rich repeat containing 49 [Source:HGNC Symbol;Acc:HGNC:25965]
circRNA2454	27.7781	90.4743	64.6514	55.8361	47.1079	0	0	0	52.9614	21.0347	34.3283	0	1.39989	up	0.026307	0.453811	yes	chr3	63898399	63952483	+	4	circRNA	ENST00000474112	ATXN7	chr3:63864999-63898398|chr3:63952483-63979914	ataxin 7 [Source:HGNC Symbol;Acc:HGNC:10560]
circRNA4691	0	12.9249	0	0	15.7026	0	154.843	93.2549	39.7211	21.0347	68.6565	27.843	-3.8237	down	0.026465	0.455733	yes	chr17	67945409	67948306	+	3	circRNA	ENST00000321892	BPTF	chr17:67944372-67945408|chr17:67948306-67959540	bromodomain PHD finger transcription factor [Source:HGNC Symbol;Acc:HGNC:3581]
circRNA19237	0	0	0	0	0	0	0	46.6274	13.2404	42.0693	154.477	0	-inf	down	0.02648	0.455733	yes	chr12	56159587	56160320	+	3	circRNA	ENST00000550697	MYL6	chr12:56158711-56159586|chr12:56160320-56160625	myosin light chain 6 [Source:HGNC Symbol;Acc:HGNC:7587]
circRNA17401	0	0	0	0	0	0	15.4843	0	26.4807	63.104	0	97.4504	-inf	down	0.02654	0.456235	yes	chr7	71415889	71421105	+	2	circRNA	ENST00000333538	GALNT17	chr7:71388401-71415888|chr7:71421105-71571284	polypeptide N-acetylgalactosaminyltransferase 17 [Source:HGNC Symbol;Acc:HGNC:16347]
circRNA21325	0	0	0	0	0	0	0	93.2549	66.2018	21.0347	0	27.843	-inf	down	0.026656	0.457596	yes	chr7	151477333	151498180	-	4	circRNA	ENST00000478470	RHEB	chr7:151471605-151477332|chr7:151498180-151519459	Ras homolog enriched in brain [Source:HGNC Symbol;Acc:HGNC:10011]
circRNA5062	0	25.8498	0	0	15.7026	0	0	77.7124	39.7211	147.243	85.8206	139.215	-3.55893	down	0.026681	0.457596	yes	chr15	83151215	83164075	-	4	circRNA	ENST00000299633	HDGFL3	chr15:83139275-83151214|chr15:83164075-83207330	HDGF like 3 [Source:HGNC Symbol;Acc:HGNC:24937]
circRNA22893	0	0	0	0	0	0	0	15.5425	39.7211	31.552	51.4924	55.686	-inf	down	0.026731	0.457667	yes	chr1	77711747	77713281	-	2	circRNA	ENST00000370794	USP33	chr1:77701471-77711746|chr1:77713281-77714613	ubiquitin specific peptidase 33 [Source:HGNC Symbol;Acc:HGNC:20059]
circRNA49	13.8891	38.7747	77.5816	55.8361	31.4053	13.3348	92.9059	357.477	304.528	136.725	154.477	167.058	-2.39393	down	0.026747	0.457667	yes	chrX	107840670	107854704	+	2	circRNA	ENST00000262843	MID2	chrX:107826430-107840669|chrX:107854704-107903957	midline 2 [Source:HGNC Symbol;Acc:HGNC:7096]
circRNA21779	0	0	0	0	0	0	0	31.085	92.6825	31.552	0	41.7645	-inf	down	0.026831	0.458575	yes	chr4	38054199	38118192	+	6	circRNA	ENST00000261439	TBC1D1	chr4:38049898-38054198|chr4:38118192-38124961	TBC1 domain family member 1 [Source:HGNC Symbol;Acc:HGNC:11578]
circRNA5245	0	25.8498	25.8605	13.959	31.4053	0	170.328	202.052	39.7211	84.1387	154.477	83.5289	-2.9191	down	0.026874	0.45878	yes	chr14	96555847	96556413	+	2	circRNA	ENST00000216277	PAPOLA	chr14:96552622-96555846|chr14:96556413-96560648	poly(A) polymerase alpha [Source:HGNC Symbol;Acc:HGNC:14981]
circRNA3396	138.891	155.099	90.5119	55.8361	62.8106	40.0045	201.296	559.529	225.086	294.485	532.088	487.252	-2.08204	down	0.026931	0.459223	yes	chr9	109050283	109050692	-	2	circRNA	ENST00000374586	TMEM245	chr9:109038117-109050282|chr9:109050692-109057190	transmembrane protein 245 [Source:HGNC Symbol;Acc:HGNC:1363]
circRNA17199	0	0	0	0	0	0	30.9686	0	39.7211	52.5867	51.4924	13.9215	-inf	down	0.026974	0.459427	yes	chr18	42015476	42029441	+	4	circRNA	ENST00000262039	PIK3C3	chr18:42013596-42015475|chr18:42029441-42033825	phosphatidylinositol 3-kinase catalytic subunit type 3 [Source:HGNC Symbol;Acc:HGNC:8974]
circRNA4262	0	12.9249	0	0	0	0	170.328	77.7124	132.404	0	0	0	-4.87946	down	0.027167	0.461866	yes	chr11	120473050	120477526	+	6	circRNA	ENST00000356641	ARHGEF12	chr11:120469388-120473049|chr11:120477526-120478155	Rho guanine nucleotide exchange factor 12 [Source:HGNC Symbol;Acc:HGNC:14193]
circRNA454	27.7781	0	0	0	0	0	0	77.7124	66.2018	73.6214	137.313	55.686	-3.88548	down	0.02721	0.461866	yes	chr11	94850114	94859715	+	3	circRNA	ENST00000317829	AMOTL1	chr11:94831541-94850113|chr11:94859715-94864734	angiomotin like 1 [Source:HGNC Symbol;Acc:HGNC:17811]
circRNA20615	0	0	0	0	0	0	0	31.085	39.7211	52.5867	34.3283	27.843	-inf	down	0.027222	0.461866	yes	chr14	88478920	88480352	-	1	circRNA	ENST00000328736	PTPN21	chr14:88473802-88478919|chr14:88480352-88485075	protein tyrosine phosphatase, non-receptor type 21 [Source:HGNC Symbol;Acc:HGNC:9651]
circRNA19243	0	0	0	0	0	0	0	77.7124	0	42.0693	51.4924	41.7645	-inf	down	0.027242	0.461866	yes	chr12	56568975	56571855	+	3	circRNA	ENST00000262031	RBMS2	chr12:56562583-56568974|chr12:56571855-56581183	RNA binding motif single stranded interacting protein 2 [Source:HGNC Symbol;Acc:HGNC:9909]
circRNA18672	0	0	0	0	0	0	15.4843	62.1699	13.2404	52.5867	0	41.7645	-inf	down	0.027328	0.462794	yes	chr9	15177697	15187035	-	4	circRNA	ENST00000512701	TTC39B	chr9:15175135-15177696|chr9:15187035-15187970	tetratricopeptide repeat domain 39B [Source:HGNC Symbol;Acc:HGNC:23704]
circRNA16953	0	0	0	0	0	0	15.4843	0	105.923	21.0347	51.4924	13.9215	-inf	down	0.027381	0.463089	yes	chr15	64112573	64118854	+	3	circRNA	ENST00000560829	SNX1	chr15:64094335-64112572|chr15:64118854-64123502	sorting nexin 1 [Source:HGNC Symbol;Acc:HGNC:11172]
circRNA3573	41.6672	77.5494	64.6514	153.549	0	0	0	0	26.4807	31.552	0	41.7645	1.75746	up	0.027408	0.463089	yes	chr8	101558419	101558812	+	1	circRNA	ENST00000251808	GRHL2	chr8:101552782-101558418|chr8:101558812-101570338	grainyhead like transcription factor 2 [Source:HGNC Symbol;Acc:HGNC:2799]
circRNA6509	0	25.8498	0	0	0	0	30.9686	46.6274	66.2018	84.1387	68.6565	41.7645	-3.71032	down	0.027462	0.463472	yes	chr4	147879232	147881932	+	2	circRNA	ENST00000336498	ARHGAP10	chr4:147875150-147879231|chr4:147881932-147906637	Rho GTPase activating protein 10 [Source:HGNC Symbol;Acc:HGNC:26099]
circRNA17193	0	0	0	0	0	0	15.4843	77.7124	26.4807	21.0347	68.6565	0	-inf	down	0.027567	0.464714	yes	chr18	34806219	34812113	+	2	circRNA	ENST00000283365	DTNA	chr18:34794250-34806218|chr18:34812113-34815908	dystrobrevin alpha [Source:HGNC Symbol;Acc:HGNC:3057]
circRNA7278	0	12.9249	0	13.959	0	0	30.9686	108.797	66.2018	42.0693	85.8206	41.7645	-3.80447	down	0.027679	0.466072	yes	chr1	51772070	51772723	+	2	circRNA	ENST00000371714	OSBPL9	chr1:51765981-51772069|chr1:51772723-51776832	oxysterol binding protein like 9 [Source:HGNC Symbol;Acc:HGNC:16386]
circRNA20807	0	0	0	0	0	0	0	31.085	52.9614	73.6214	17.1641	13.9215	-inf	down	0.027805	0.467121	yes	chr18	8783530	8784843	+	1	circRNA	ENST00000306329	MTCL1	chr18:8777892-8783529|chr18:8784843-8785935	microtubule crosslinking factor 1 [Source:HGNC Symbol;Acc:HGNC:29121]
circRNA4030	0	38.7747	38.7908	27.9181	47.1079	26.6697	46.453	139.882	145.644	168.277	274.626	264.508	-2.5356	down	0.027829	0.467121	yes	chr12	122340753	122341697	-	1	circRNA	ENST00000302528	CLIP1	chr12:122336748-122340752|chr12:122341697-122347374	CAP-Gly domain containing linker protein 1 [Source:HGNC Symbol;Acc:HGNC:10461]
circRNA18540	0	0	0	0	0	0	30.9686	46.6274	13.2404	0	51.4924	55.686	-inf	down	0.027836	0.467121	yes	chr1	112917178	112918044	-	1	circRNA	ENST00000369626	SLC16A1	chr1:112914165-112917177|chr1:112918044-112921989	solute carrier family 16 member 1 [Source:HGNC Symbol;Acc:HGNC:10922]
circRNA19516	0	0	0	0	0	0	0	108.797	26.4807	0	68.6565	27.843	-inf	down	0.027906	0.467765	yes	chr11	64757779	64758704	-	4	circRNA	ENST00000164139	PYGM	chr11:64755558-64757778|chr11:64758704-64759655	glycogen phosphorylase, muscle associated [Source:HGNC Symbol;Acc:HGNC:9726]
circRNA7678	0	38.7747	0	13.959	0	0	15.4843	217.595	39.7211	63.104	102.985	55.686	-3.22939	down	0.028038	0.469446	yes	chr9	109106508	109108570	-	2	circRNA	ENST00000374586	TMEM245	chr9:109093591-109106507|chr9:109108570-109119334	transmembrane protein 245 [Source:HGNC Symbol;Acc:HGNC:1363]
circRNA361	27.7781	297.273	38.7908	27.9181	109.918	26.6697	108.39	326.392	463.413	294.485	326.118	292.351	-1.77735	down	0.028174	0.470842	yes	chr11	36227085	36227430	+	1	circRNA	ENST00000524419	LDLRAD3	chr11:36102031-36227084|chr11:36227430-36229159	low density lipoprotein receptor class A domain containing 3 [Source:HGNC Symbol;Acc:HGNC:27046]
circRNA11132	0	0	0	27.9181	0	0	30.9686	93.2549	39.7211	52.5867	51.4924	69.6074	-3.59618	down	0.028185	0.470842	yes	chr11	122956496	122957491	+	2	circRNA	ENST00000227349	C11orf63	chr11:122946792-122956495|chr11:122957491-122959247	chromosome 11 open reading frame 63 [Source:HGNC Symbol;Acc:HGNC:26288]
circRNA13183	0	0	0	0	47.1079	0	15.4843	77.7124	66.2018	42.0693	102.985	83.5289	-3.04195	down	0.028359	0.472915	yes	chr19	45517663	45518094	+	2	circRNA	ENST00000245932	VASP	chr19:45507776-45517662|chr19:45518094-45521321	vasodilator stimulated phosphoprotein [Source:HGNC Symbol;Acc:HGNC:12652]
circRNA2219	13.8891	77.5494	12.9303	13.959	31.4053	0	0	0	13.2404	0	0	0	3.49938	up	0.028373	0.472915	yes	chr4	25847294	25847864	-	1	circRNA	ENST00000399878	SEL1L3	chr4:25835323-25847293|chr4:25847864-25862674	SEL1L family member 3 [Source:HGNC Symbol;Acc:HGNC:29108]
circRNA9323	0	0	38.7908	0	62.8106	0	15.4843	248.68	105.923	126.208	171.641	27.843	-2.77571	down	0.028408	0.472966	yes	chr7	105038126	105041023	+	2	circRNA	ENST00000311117	KMT2E	chr7:105014535-105038125|chr7:105041023-105062163	lysine methyltransferase 2E [Source:HGNC Symbol;Acc:HGNC:18541]
circRNA16260	0	0	0	0	0	0	30.9686	31.085	13.2404	73.6214	0	27.843	-inf	down	0.028531	0.47448	yes	chr12	48939655	48941188	-	3	circRNA	ENST00000398092	AC073610.3	chr12:48903908-48939654|chr12:48941188-48957309	NA
circRNA1630	13.8891	0	0	13.959	47.1079	26.6697	0	0	0	0	0	0	inf	up	0.028721	0.476851	yes	chr7	39997494	40002031	+	3	circRNA	ENST00000181839	CDK13	chr7:39988258-39997493|chr7:40002031-40045835	cyclin dependent kinase 13 [Source:HGNC Symbol;Acc:HGNC:1733]
circRNA280	41.6672	0	0	0	0	0	0	155.425	132.404	73.6214	154.477	0	-3.63018	down	0.028738	0.476851	yes	chr12	99772922	99782097	-	4	circRNA	ENST00000547776	ANKS1B	chr12:99655210-99772921|chr12:99782097-99806403	ankyrin repeat and sterile alpha motif domain containing 1B [Source:HGNC Symbol;Acc:HGNC:24600]
circRNA20168	0	0	0	0	0	0	0	31.085	13.2404	21.0347	85.8206	55.686	-inf	down	0.028984	0.480394	yes	chr16	15757827	15763891	-	4	circRNA	ENST00000396324	MYH11	chr16:15756514-15757826|chr16:15763891-15771568	myosin heavy chain 11 [Source:HGNC Symbol;Acc:HGNC:7569]
circRNA1803	13.8891	51.6996	103.442	0	94.2159	40.0045	77.4216	341.935	211.846	199.829	343.283	194.901	-2.17476	down	0.029199	0.483417	yes	chr7	152309966	152315338	-	3	circRNA	ENST00000262189	KMT2C	chr7:152273867-152309965|chr7:152315338-152330600	lysine methyltransferase 2C [Source:HGNC Symbol;Acc:HGNC:13726]
circRNA13599	0	0	0	0	15.7026	0	15.4843	62.1699	26.4807	126.208	51.4924	27.843	-4.30169	down	0.029322	0.484911	yes	chr4	78237510	78255375	+	4	circRNA	ENST00000325942	FRAS1	chr4:78066016-78237509|chr4:78255375-78265024	Fraser extracellular matrix complex subunit 1 [Source:HGNC Symbol;Acc:HGNC:19185]
circRNA2277	13.8891	219.723	64.6514	41.8771	78.5132	0	61.9373	248.68	198.605	357.589	497.76	278.43	-1.9725	down	0.029427	0.485604	yes	chr4	76134175	76144473	-	3	circRNA	ENST00000507257	NUP54	chr4:76132719-76134174|chr4:76144473-76148307	nucleoporin 54 [Source:HGNC Symbol;Acc:HGNC:17359]
circRNA1569	69.4453	0	0	0	0	0	15.4843	124.34	52.9614	94.656	51.4924	97.4504	-2.65165	down	0.029466	0.485604	yes	chr7	5641154	5641376	-	1	circRNA	ENST00000425013	RNF216	chr7:5624125-5641153|chr7:5641376-5652412	ring finger protein 216 [Source:HGNC Symbol;Acc:HGNC:21698]
circRNA17767	0	0	0	0	0	0	15.4843	31.085	39.7211	0	34.3283	69.6074	-inf	down	0.029491	0.485604	yes	chr5	139317053	139319501	+	4	circRNA	ENST00000509990	MATR3	chr5:139316188-139317052|chr5:139319501-139321897	matrin 3 [Source:NCBI gene;Acc:9782]
circRNA18701	0	0	0	0	0	0	15.4843	31.085	13.2404	21.0347	85.8206	27.843	-inf	down	0.029518	0.485604	yes	chr9	77238002	77260224	+	6	circRNA	ENST00000376634	VPS13A	chr9:77228264-77238001|chr9:77260224-77273279	vacuolar protein sorting 13 homolog A [Source:HGNC Symbol;Acc:HGNC:1908]
circRNA22095	0	0	0	0	0	0	0	62.1699	0	31.552	102.985	27.843	-inf	down	0.029528	0.485604	yes	chr3	66236544	66263379	+	4	circRNA	ENST00000354883	SLC25A26	chr3:66221127-66236543|chr3:66263379-66346363	solute carrier family 25 member 26 [Source:HGNC Symbol;Acc:HGNC:20661]
circRNA19281	0	0	0	0	0	0	0	46.6274	0	52.5867	85.8206	27.843	-inf	down	0.029688	0.487694	yes	chr12	82895818	82896646	+	1	circRNA	ENST00000551915	TMTC2	chr12:82857580-82895817|chr12:82896646-82930430	transmembrane and tetratricopeptide repeat containing 2 [Source:HGNC Symbol;Acc:HGNC:25440]
circRNA18828	0	0	0	0	0	0	15.4843	31.085	13.2404	52.5867	34.3283	27.843	-inf	down	0.029798	0.488958	yes	chr8	91970658	91991889	-	5	circRNA	ENST00000613886	RUNX1T1	chr8:91960517-91970657|chr8:91991889-92005115	RUNX1 translocation partner 1 [Source:HGNC Symbol;Acc:HGNC:1535]
circRNA673	13.8891	0	0	0	0	0	92.9059	77.7124	26.4807	10.5173	17.1641	55.686	-4.33581	down	0.029854	0.489335	yes	chr17	8569720	8577338	-	3	circRNA	ENST00000360416	MYH10	chr17:8554018-8569719|chr17:8577338-8589080	myosin heavy chain 10 [Source:HGNC Symbol;Acc:HGNC:7568]
circRNA17811	0	0	0	0	0	0	46.453	0	13.2404	31.552	34.3283	55.686	-inf	down	0.029935	0.489872	yes	chr4	20491761	20529099	+	7	circRNA	ENST00000503823	SLIT2	chr4:20488982-20491760|chr4:20529099-20531983	slit guidance ligand 2 [Source:HGNC Symbol;Acc:HGNC:11086]
ciRNA443	0	0	0	0	0	0	0	108.797	66.2018	42.0693	0	0	-inf	down	0.029953	0.489872	yes	chr1	21847531	21847688	-	1	ciRNA	ENST00000374695	HSPG2	chr1:21847492-21847688	heparan sulfate proteoglycan 2 [Source:HGNC Symbol;Acc:HGNC:5273]
circRNA8204	0	0	51.7211	0	0	0	61.9373	62.1699	66.2018	73.6214	68.6565	41.7645	-2.85557	down	0.030055	0.490497	yes	chr12	111933886	111943369	-	5	circRNA	ENST00000550831	TMEM116	chr12:111932659-111933885|chr12:111943369-111991757	transmembrane protein 116 [Source:HGNC Symbol;Acc:HGNC:25084]
circRNA16372	0	0	0	0	0	0	77.4216	62.1699	0	42.0693	17.1641	0	-inf	down	0.030084	0.490497	yes	chr11	3731391	3735324	-	2	circRNA	ENST00000324932	NUP98	chr11:3725219-3731390|chr11:3735324-3744508	nucleoporin 98 [Source:HGNC Symbol;Acc:HGNC:8068]
circRNA7282	0	90.4743	38.7908	55.8361	0	0	92.9059	233.137	105.923	168.277	171.641	97.4504	-2.2316	down	0.030123	0.490497	yes	chr1	51827796	51834170	-	2	circRNA	ENST00000352171	NRDC	chr1:51825382-51827795|chr1:51834170-51836130	nardilysin convertase [Source:HGNC Symbol;Acc:HGNC:7995]
circRNA756	13.8891	0	25.8605	0	78.5132	0	15.4843	108.797	132.404	126.208	205.97	111.372	-2.56584	down	0.030189	0.490497	yes	chr17	54938924	54947312	+	2	circRNA	ENST00000575882	TOM1L1	chr17:54937226-54938923|chr17:54947312-54949517	target of myb1 like 1 membrane trafficking protein [Source:HGNC Symbol;Acc:HGNC:11983]
circRNA4909	0	51.6996	77.5816	0	0	0	0	0	0	0	0	0	inf	up	0.03019	0.490497	yes	chr16	88018428	88038011	+	5	circRNA	ENST00000286122	BANP	chr16:88006265-88018427|chr16:88038011-88065266	BTG3 associated nuclear protein [Source:HGNC Symbol;Acc:HGNC:13450]
circRNA9440	0	0	25.8605	13.959	0	0	15.4843	46.6274	132.404	52.5867	85.8206	83.5289	-3.3866	down	0.030222	0.490497	yes	chr6	85618818	85619417	-	2	circRNA	ENST00000616122	SYNCRIP	chr6:85615347-85618817|chr6:85619417-85622481	synaptotagmin binding cytoplasmic RNA interacting protein [Source:HGNC Symbol;Acc:HGNC:16918]
circRNA12085	0	0	0	13.959	47.1079	0	0	62.1699	105.923	84.1387	85.8206	180.979	-3.08736	down	0.030271	0.490497	yes	chr3	188484592	188524787	+	2	circRNA	ENST00000448637	LPP	chr3:188406313-188484591|chr3:188524787-188609160	LIM domain containing preferred translocation partner in lipoma [Source:HGNC Symbol;Acc:HGNC:6679]
circRNA14065	0	0	0	0	15.7026	0	123.875	108.797	26.4807	42.0693	34.3283	0	-4.41745	down	0.030351	0.490497	yes	chr1	243613671	243843282	-	7	circRNA	ENST00000366540	AKT3	chr1:243573048-243613670|chr1:243843282-243843543	AKT serine/threonine kinase 3 [Source:HGNC Symbol;Acc:HGNC:393]
circRNA17654	0	0	0	0	0	0	15.4843	46.6274	39.7211	42.0693	0	27.843	-inf	down	0.030366	0.490497	yes	chr5	6622016	6625669	-	3	circRNA	ENST00000264670	NSUN2	chr5:6620298-6622015|chr5:6625669-6631872	NOP2/Sun RNA methyltransferase family member 2 [Source:HGNC Symbol;Acc:HGNC:25994]
circRNA16645	0	0	0	0	0	0	46.453	77.7124	39.7211	0	0	27.843	-inf	down	0.030375	0.490497	yes	chr17	1480527	1480885	-	2	circRNA	ENST00000359786	MYO1C	chr17:1479705-1480526|chr17:1480885-1482477	myosin IC [Source:HGNC Symbol;Acc:HGNC:7597]
circRNA666	13.8891	38.7747	0	0	78.5132	13.3348	77.4216	170.967	92.6825	105.173	154.477	153.136	-2.38311	down	0.030398	0.490497	yes	chr17	4282798	4296814	-	3	circRNA	ENST00000396981	UBE2G1	chr17:4272516-4282797|chr17:4296814-4307020	ubiquitin conjugating enzyme E2 G1 [Source:HGNC Symbol;Acc:HGNC:12482]
circRNA1527	83.3344	25.8498	12.9303	0	0	53.3393	0	0	0	0	0	27.843	2.65571	up	0.030419	0.490497	yes	chr21	33421480	33432871	+	4	circRNA	ENST00000290219	IFNGR2	chr21:33415020-33421479|chr21:33432871-33436827	interferon gamma receptor 2 [Source:HGNC Symbol;Acc:HGNC:5440]
circRNA21191	0	0	0	0	0	0	0	46.6274	66.2018	0	68.6565	27.843	-inf	down	0.030422	0.490497	yes	chr7	65752164	65756574	+	4	circRNA	ENST00000434500	CCT6P1	chr7:65751278-65752163|chr7:65756574-65757602	chaperonin containing TCP1 subunit 6 pseudogene 1 [Source:HGNC Symbol;Acc:HGNC:33094]
circRNA1675	27.7781	0	25.8605	0	0	53.3393	0	0	0	0	0	0	inf	up	0.030479	0.490881	yes	chr7	77571078	77592256	+	5	circRNA	ENST00000248594	PTPN12	chr7:77537645-77571077|chr7:77592256-77597841	protein tyrosine phosphatase, non-receptor type 12 [Source:HGNC Symbol;Acc:HGNC:9645]
circRNA22478	0	0	0	0	0	0	0	15.5425	79.4422	0	102.985	27.843	-inf	down	0.030604	0.491772	yes	chr2	97813971	97833426	-	5	circRNA	ENST00000186436	TMEM131	chr2:97812749-97813970|chr2:97833426-97834620	transmembrane protein 131 [Source:HGNC Symbol;Acc:HGNC:30366]
circRNA4864	0	12.9249	12.9303	0	15.7026	0	77.4216	62.1699	39.7211	73.6214	120.149	69.6074	-3.41311	down	0.030632	0.491772	yes	chr16	69284048	69284244	+	1	circRNA	ENST00000336278	SNTB2	chr16:69270285-69284047|chr16:69284244-69299589	syntrophin beta 2 [Source:HGNC Symbol;Acc:HGNC:11169]
circRNA23252	0	0	0	0	0	0	0	46.6274	105.923	31.552	0	13.9215	-inf	down	0.030634	0.491772	yes	chr9	97347314	97350555	+	3	circRNA	ENST00000534123	AL512590.3	chr9:97343563-97347313|chr9:97350555-97354568	NA
circRNA11525	0	0	0	27.9181	0	0	77.4216	62.1699	26.4807	63.104	102.985	13.9215	-3.63185	down	0.030749	0.493083	yes	chr19	47362476	47362693	+	1	circRNA	ENST00000328771	DHX34	chr19:47360070-47362475|chr19:47362693-47366980	DExH-box helicase 34 [Source:HGNC Symbol;Acc:HGNC:16719]
circRNA4310	0	38.7747	0	0	0	40.0045	108.39	93.2549	0	0	377.611	208.822	-3.32245	down	0.030833	0.493111	yes	chr10	15833630	15847943	-	6	circRNA	ENST00000477891	MINDY3	chr10:15821726-15833629|chr10:15847943-15860205	MINDY lysine 48 deubiquitinase 3 [Source:HGNC Symbol;Acc:HGNC:23578]
circRNA23189	0	0	0	0	0	0	0	62.1699	66.2018	0	17.1641	55.686	-inf	down	0.030854	0.493111	yes	chr9	35236469	35243364	+	3	circRNA	ENST00000617908	UNC13B	chr9:35231219-35236468|chr9:35243364-35258992	unc-13 homolog B [Source:HGNC Symbol;Acc:HGNC:12566]
circRNA1265	13.8891	25.8498	25.8605	41.8771	0	66.6741	0	0	0	0	34.3283	13.9215	1.85174	up	0.030857	0.493111	yes	chr19	11120092	11120522	+	2	circRNA	ENST00000558518	LDLR	chr19:11116998-11120091|chr19:11120522-11123173	low density lipoprotein receptor [Source:HGNC Symbol;Acc:HGNC:6547]
circRNA11469	0	0	0	41.8771	31.4053	0	61.9373	62.1699	66.2018	84.1387	205.97	41.7645	-2.83301	down	0.030884	0.493111	yes	chr14	88416711	88437903	+	8	circRNA	ENST00000045347	SPATA7	chr14:88396203-88416710|chr14:88437903-88438326	spermatogenesis associated 7 [Source:HGNC Symbol;Acc:HGNC:20423]
circRNA18000	0	0	0	0	0	0	30.9686	15.5425	39.7211	52.5867	0	27.843	-inf	down	0.03095	0.493468	yes	chr3	49044390	49057890	-	4	circRNA	ENST00000395443	QRICH1	chr3:49033228-49044389|chr3:49057890-49076708	glutamine rich 1 [Source:HGNC Symbol;Acc:HGNC:24713]
circRNA3432	13.8891	0	0	0	0	0	15.4843	62.1699	105.923	31.552	17.1641	69.6074	-4.44205	down	0.030973	0.493468	yes	chr9	125929655	125935607	+	2	circRNA	ENST00000342287	PBX3	chr9:125915927-125929654|chr9:125935607-125960683	PBX homeobox 3 [Source:HGNC Symbol;Acc:HGNC:8634]
circRNA8696	0	0	12.9303	0	31.4053	66.6741	0	0	0	0	0	0	inf	up	0.031136	0.495531	yes	chr15	49225205	49239367	+	3	circRNA	ENST00000559208	GALK2	chr15:49217313-49225204|chr15:49239367-49281986	galactokinase 2 [Source:HGNC Symbol;Acc:HGNC:4119]
circRNA22002	0	0	0	0	0	0	0	124.34	39.7211	0	85.8206	0	-inf	down	0.031188	0.495826	yes	chr3	24190074	24190334	-	1	circRNA	ENST00000396671	THRB	chr3:24152490-24190073|chr3:24190334-24228937	thyroid hormone receptor beta [Source:HGNC Symbol;Acc:HGNC:11799]
circRNA23119	0	0	0	0	0	0	0	31.085	0	73.6214	51.4924	41.7645	-inf	down	0.031304	0.49665	yes	chr1	236024070	236038253	-	5	circRNA	ENST00000366595	NID1	chr1:235993872-236024069|chr1:236038253-236041909	nidogen 1 [Source:HGNC Symbol;Acc:HGNC:7821]
circRNA21760	0	0	0	0	0	0	0	46.6274	26.4807	21.0347	51.4924	41.7645	-inf	down	0.031307	0.49665	yes	chr4	7855466	7872080	-	3	circRNA	ENST00000358461	AFAP1	chr4:7843350-7855465|chr4:7872080-7939655	actin filament associated protein 1 [Source:HGNC Symbol;Acc:HGNC:24017]
circRNA18596	0	0	0	0	0	0	15.4843	46.6274	13.2404	52.5867	34.3283	13.9215	-inf	down	0.031445	0.497553	yes	chr1	193138085	193142066	+	2	circRNA	ENST00000367435	CDC73	chr1:193135589-193138084|chr1:193142066-193147866	cell division cycle 73 [Source:HGNC Symbol;Acc:HGNC:16783]
circRNA6768	0	51.6996	0	0	0	13.3348	30.9686	279.765	26.4807	21.0347	205.97	41.7645	-3.22	down	0.031463	0.497553	yes	chr3	183650296	183672484	+	5	circRNA	ENST00000242810	KLHL24	chr3:183643542-183650295|chr3:183672484-183679085	kelch like family member 24 [Source:HGNC Symbol;Acc:HGNC:25947]
circRNA4712	0	142.174	0	13.959	0	0	0	0	0	0	0	0	inf	up	0.031497	0.497553	yes	chr17	79077430	79081073	+	4	circRNA	ENST00000578419	ENGASE	chr17:79075090-79077429|chr17:79081073-79081897	endo-beta-N-acetylglucosaminidase [Source:HGNC Symbol;Acc:HGNC:24622]
circRNA18901	0	0	0	0	0	0	0	46.6274	92.6825	21.0347	17.1641	13.9215	-inf	down	0.031527	0.497553	yes	chrX	23379591	23380251	+	1	circRNA	ENST00000379361	PTCHD1	chrX:23335226-23379590|chrX:23380251-23392530	patched domain containing 1 [Source:HGNC Symbol;Acc:HGNC:26392]
circRNA24961	0	0	0	0	0	0	0	0	26.4807	21.0347	51.4924	111.372	-inf	down	0.031532	0.497553	yes	chr22	45689712	45702847	+	4	circRNA	ENST00000252934	ATXN10	chr22:45672179-45689711|chr22:45702847-45718412	ataxin 10 [Source:HGNC Symbol;Acc:HGNC:10549]
circRNA18516	0	0	0	0	0	0	46.453	15.5425	26.4807	21.0347	85.8206	0	-inf	down	0.031977	0.504038	yes	chr1	91343430	91385834	-	16	circRNA	ENST00000370425	HFM1	chr1:91324766-91343429|chr1:91385834-91394092	HFM1, ATP dependent DNA helicase homolog [Source:HGNC Symbol;Acc:HGNC:20193]
circRNA21620	0	0	0	0	0	0	0	93.2549	0	42.0693	68.6565	13.9215	-inf	down	0.032055	0.504186	yes	chr5	78509784	78510398	-	1	circRNA	ENST00000515007	LHFPL2	chr5:78489153-78509783|chr5:78510398-78549025	LHFPL tetraspan subfamily member 2 [Source:HGNC Symbol;Acc:HGNC:6588]
circRNA21856	0	0	0	0	0	0	0	46.6274	39.7211	21.0347	17.1641	55.686	-inf	down	0.032069	0.504186	yes	chr4	94618004	94640450	+	2	circRNA	ENST00000437932	PDLIM5	chr4:94586444-94618003|chr4:94640450-94654459	PDZ and LIM domain 5 [Source:HGNC Symbol;Acc:HGNC:17468]
circRNA2265	13.8891	0	0	0	0	0	15.4843	0	105.923	63.104	137.313	27.843	-4.65396	down	0.032188	0.504186	yes	chr4	67720422	67730170	+	3	circRNA	ENST00000500538	UBA6-AS1	chr4:67701484-67720421|chr4:67730170-67731505	UBA6 antisense RNA 1 (head to head) [Source:HGNC Symbol;Acc:HGNC:49083]
circRNA11858	0	0	0	13.959	0	0	0	0	211.846	0	154.477	111.372	-5.09682	down	0.032226	0.504186	yes	chr5	77449760	77464809	-	6	circRNA	ENST00000296679	WDR41	chr5:77440997-77449759|chr5:77464809-77489456	WD repeat domain 41 [Source:HGNC Symbol;Acc:HGNC:25601]
circRNA21819	0	0	0	0	0	0	0	124.34	39.7211	52.5867	0	0	-inf	down	0.032236	0.504186	yes	chr4	78265025	78267432	+	3	circRNA	ENST00000325942	FRAS1	chr4:78255375-78265024|chr4:78267432-78278654	Fraser extracellular matrix complex subunit 1 [Source:HGNC Symbol;Acc:HGNC:19185]
circRNA19771	0	0	0	0	0	0	0	62.1699	52.9614	84.1387	0	0	-inf	down	0.032247	0.504186	yes	chr10	79290959	79292356	+	2	circRNA	ENST00000334512	ZMIZ1	chr10:79289889-79290958|chr10:79292356-79293380	zinc finger MIZ-type containing 1 [Source:HGNC Symbol;Acc:HGNC:16493]
circRNA21073	0	0	0	0	0	0	0	31.085	66.2018	0	85.8206	27.843	-inf	down	0.032249	0.504186	yes	chr20	49539570	49544448	-	2	circRNA	ENST00000244043	PTGIS	chr20:49524239-49539569|chr20:49544448-49547840	prostaglandin I2 synthase [Source:HGNC Symbol;Acc:HGNC:9603]
circRNA17120	0	0	0	0	0	0	30.9686	0	13.2404	31.552	34.3283	69.6074	-inf	down	0.032265	0.504186	yes	chr19	17200293	17200829	+	2	circRNA	ENST00000595618	MYO9B	chr19:17198308-17200292|chr19:17200829-17201925	myosin IXB [Source:HGNC Symbol;Acc:HGNC:7609]
circRNA23536	0	0	0	0	0	0	0	0	26.4807	52.5867	102.985	27.843	-inf	down	0.032293	0.504186	yes	chrX	31679375	31679586	-	1	circRNA	ENST00000358062	DMD	chrX:31658144-31679374|chrX:31679586-31729630	dystrophin [Source:HGNC Symbol;Acc:HGNC:2928]
circRNA18812	0	0	0	0	0	0	46.453	15.5425	13.2404	10.5173	34.3283	55.686	-inf	down	0.032381	0.505028	yes	chr8	67118248	67164508	+	11	circRNA	ENST00000262210	CSPP1	chr8:67116122-67118247|chr8:67164508-67172415	centrosome and spindle pole associated protein 1 [Source:HGNC Symbol;Acc:HGNC:26193]
circRNA15804	0	0	0	0	0	13.3348	61.9373	62.1699	0	31.552	120.149	41.7645	-4.57382	down	0.03262	0.50822	yes	chr1	25227442	25228235	-	2	circRNA	ENST00000236273	SYF2	chr1:25225100-25227441|chr1:25228235-25228997	SYF2 pre-mRNA splicing factor [Source:HGNC Symbol;Acc:HGNC:19824]
circRNA3761	0	64.6245	0	0	0	13.3348	77.4216	139.882	79.4422	31.552	85.8206	69.6074	-2.6334	down	0.032755	0.509786	yes	chr13	41865736	41868477	-	3	circRNA	ENST00000379310	VWA8	chr13:41833531-41865735|chr13:41868477-41883386	von Willebrand factor A domain containing 8 [Source:HGNC Symbol;Acc:HGNC:29071]
circRNA637	41.6672	0	12.9303	0	47.1079	13.3348	0	341.935	39.7211	1630.19	68.6565	27.843	-4.1959	down	0.032844	0.509798	yes	chr10	115120185	115129535	+	5	circRNA	ENST00000616894	ATRNL1	chr10:115096839-115120184|chr10:115129535-115160039	attractin like 1 [Source:HGNC Symbol;Acc:HGNC:29063]
circRNA17924	0	0	0	0	0	0	30.9686	139.882	0	52.5867	0	0	-inf	down	0.032852	0.509798	yes	chr4	159238809	159241368	+	2	circRNA	ENST00000505478	RAPGEF2	chr4:159210583-159238808|chr4:159241368-159243773	Rap guanine nucleotide exchange factor 2 [Source:HGNC Symbol;Acc:HGNC:16854]
circRNA2610	13.8891	12.9249	0	0	0	0	61.9373	62.1699	39.7211	63.104	68.6565	41.7645	-3.6532	down	0.032909	0.509798	yes	chr2	23798138	23823569	-	4	circRNA	ENST00000238789	ATAD2B	chr2:23788647-23798137|chr2:23823569-23828848	ATPase family, AAA domain containing 2B [Source:HGNC Symbol;Acc:HGNC:29230]
circRNA1570	13.8891	0	0	0	0	0	0	46.6274	52.9614	52.5867	85.8206	83.5289	-4.53291	down	0.032925	0.509798	yes	chr7	5711761	5730817	-	8	circRNA	ENST00000425013	RNF216	chr7:5652510-5711760|chr7:5730817-5739275	ring finger protein 216 [Source:HGNC Symbol;Acc:HGNC:21698]
circRNA17483	0	0	0	0	0	0	15.4843	0	13.2404	10.5173	85.8206	83.5289	-inf	down	0.032928	0.509798	yes	chr7	158879684	158891333	+	4	circRNA	ENST00000407559	WDR60	chr7:158876691-158879683|chr7:158891333-158901738	WD repeat domain 60 [Source:HGNC Symbol;Acc:HGNC:21862]
circRNA2501	111.113	77.5494	90.5119	69.7952	47.1079	40.0045	30.9686	590.614	264.807	305.003	566.416	445.488	-2.33699	down	0.033057	0.511261	yes	chr3	125313308	125331238	-	3	circRNA	ENST00000360647	ZNF148	chr3:125288228-125313307|chr3:125331238-125375101	zinc finger protein 148 [Source:HGNC Symbol;Acc:HGNC:12933]
circRNA16965	0	0	0	0	0	0	30.9686	0	0	73.6214	137.313	0	-inf	down	0.033101	0.511407	yes	chr15	68141946	68164804	+	6	circRNA	ENST00000249636	PIAS1	chr15:68086750-68141945|chr15:68164804-68173731	protein inhibitor of activated STAT 1 [Source:HGNC Symbol;Acc:HGNC:2752]
circRNA16124	0	0	0	0	0	0	46.453	93.2549	0	0	0	69.6074	-inf	down	0.033279	0.513333	yes	chrX	73577407	73584572	+	2	circRNA	ENST00000373504	CHIC1	chrX:73563580-73577406|chrX:73584572-73679325	cysteine rich hydrophobic domain 1 [Source:HGNC Symbol;Acc:HGNC:1934]
circRNA10593	0	0	12.9303	0	0	0	15.4843	77.7124	66.2018	31.552	34.3283	41.7645	-4.36825	down	0.033295	0.513333	yes	chr1	172551512	172591071	+	16	circRNA	ENST00000367723	SUCO	chr1:172533497-172551511|chr1:172591071-172600063	SUN domain containing ossification factor [Source:HGNC Symbol;Acc:HGNC:1240]
circRNA1653	41.6672	0	0	0	0	53.3393	139.359	155.425	92.6825	0	308.954	41.7645	-2.95788	down	0.033505	0.516033	yes	chr7	66286511	66286709	+	1	circRNA	ENST00000304842	TPST1	chr7:66241270-66286510|chr7:66286709-66352504	tyrosylprotein sulfotransferase 1 [Source:HGNC Symbol;Acc:HGNC:12020]
circRNA4491	0	25.8498	51.7211	0	0	26.6697	0	0	0	0	0	0	inf	up	0.0338	0.519862	yes	chr17	247111	327579	-	5	circRNA	ENST00000618002	RPH3AL	chr17:219736-247110|chr17:327579-352711	rabphilin 3A like (without C2 domains) [Source:HGNC Symbol;Acc:HGNC:10296]
circRNA2523	13.8891	0	12.9303	0	0	0	0	31.085	66.2018	63.104	137.313	139.215	-4.02602	down	0.033857	0.519862	yes	chr3	146102755	146124229	-	6	circRNA	ENST00000282903	PLOD2	chr3:146091901-146102754|chr3:146124229-146160880	procollagen-lysine,2-oxoglutarate 5-dioxygenase 2 [Source:HGNC Symbol;Acc:HGNC:9082]
circRNA3059	41.6672	0	0	0	0	0	30.9686	108.797	39.7211	0	171.641	97.4504	-3.42838	down	0.033859	0.519862	yes	chr1	52801819	52802139	+	2	circRNA	ENST00000545132	ZYG11B	chr1:52796784-52801818|chr1:52802139-52805470	zyg-11 family member B, cell cycle regulator [Source:HGNC Symbol;Acc:HGNC:25820]
circRNA21124	0	0	0	0	0	0	0	124.34	26.4807	10.5173	68.6565	0	-inf	down	0.033936	0.520441	yes	chr7	5624056	5652510	-	3	circRNA	ENST00000425013	RNF216	chr7:5623179-5624055|chr7:5652510-5711760	ring finger protein 216 [Source:HGNC Symbol;Acc:HGNC:21698]
circRNA6015	0	25.8498	38.7908	13.959	0	13.3348	46.453	170.967	132.404	63.104	102.985	111.372	-2.77044	down	0.033967	0.520441	yes	chr6	75702645	75711416	+	3	circRNA	ENST00000370010	SENP6	chr6:75697517-75702644|chr6:75711416-75713512	SUMO1/sentrin specific peptidase 6 [Source:HGNC Symbol;Acc:HGNC:20944]
circRNA21225	0	0	0	0	0	0	0	77.7124	0	21.0347	34.3283	69.6074	-inf	down	0.034063	0.521154	yes	chr7	82060428	82084900	-	4	circRNA	ENST00000356860	CACNA2D1	chr7:82038235-82060427|chr7:82084900-82117043	calcium voltage-gated channel auxiliary subunit alpha2delta 1 [Source:HGNC Symbol;Acc:HGNC:1399]
circRNA6322	0	12.9249	0	0	15.7026	0	15.4843	93.2549	66.2018	42.0693	68.6565	69.6074	-3.63346	down	0.034084	0.521154	yes	chr5	177041126	177050936	+	4	circRNA	ENST00000358149	ZNF346	chr5:177022913-177041125|chr5:177050936-177062057	zinc finger protein 346 [Source:HGNC Symbol;Acc:HGNC:16403]
circRNA19283	0	0	0	0	0	0	0	15.5425	39.7211	42.0693	34.3283	41.7645	-inf	down	0.034287	0.523421	yes	chr12	82895818	82930545	+	2	circRNA	ENST00000551915	TMTC2	chr12:82857580-82895817|chr12:82930545-82965023	transmembrane and tetratricopeptide repeat containing 2 [Source:HGNC Symbol;Acc:HGNC:25440]
circRNA22155	0	0	0	0	0	0	0	46.6274	13.2404	73.6214	17.1641	27.843	-inf	down	0.034303	0.523421	yes	chr3	123638071	123640504	-	2	circRNA	ENST00000360772	MYLK	chr3:123626941-123638070|chr3:123640504-123647223	myosin light chain kinase [Source:HGNC Symbol;Acc:HGNC:7590]
circRNA2001	13.8891	129.249	38.7908	13.959	31.4053	13.3348	0	31.085	0	0	34.3283	13.9215	1.60078	up	0.034351	0.523517	yes	chr5	618990	620261	+	2	circRNA	ENST00000264935	CEP72	chr5:612443-618989|chr5:620261-624470	centrosomal protein 72 [Source:HGNC Symbol;Acc:HGNC:25547]
circRNA25735	0	0	0	0	0	0	0	0	26.4807	42.0693	68.6565	55.686	-inf	down	0.03438	0.523517	yes	chr3	24297226	24337371	-	2	circRNA	ENST00000396671	THRB	chr3:24229001-24297225|chr3:24337371-24494686	thyroid hormone receptor beta [Source:HGNC Symbol;Acc:HGNC:11799]
circRNA14972	0	0	0	0	0	13.3348	0	77.7124	26.4807	42.0693	102.985	55.686	-4.51522	down	0.034429	0.523724	yes	chr18	46890580	46891054	-	1	circRNA	ENST00000585916	PIAS2	chr18:46864248-46890579|chr18:46891054-46917321	protein inhibitor of activated STAT 2 [Source:HGNC Symbol;Acc:HGNC:17311]
circRNA10047	0	0	12.9303	0	0	0	30.9686	62.1699	13.2404	31.552	34.3283	139.215	-4.59029	down	0.034564	0.525238	yes	chr3	152414941	152447773	+	5	circRNA	ENST00000282486	MBNL1	chr3:152300367-152414940|chr3:152447773-152456266	muscleblind like splicing regulator 1 [Source:HGNC Symbol;Acc:HGNC:6923]
circRNA16557	0	0	0	0	0	0	61.9373	15.5425	52.9614	0	17.1641	27.843	-inf	down	0.03462	0.525549	yes	chr10	45662580	45663842	-	2	circRNA	ENST00000374366	ZFAND4	chr10:45653059-45662579|chr10:45663842-45672249	zinc finger AN1-type containing 4 [Source:HGNC Symbol;Acc:HGNC:23504]
circRNA735	55.5563	12.9249	0	83.7542	31.4053	66.6741	46.453	357.477	238.326	126.208	394.775	194.901	-2.43982	down	0.034688	0.526042	yes	chr17	42727635	42730918	-	3	circRNA	ENST00000428826	EZH1	chr17:42724424-42727634|chr17:42730918-42745010	enhancer of zeste 1 polycomb repressive complex 2 subunit [Source:HGNC Symbol;Acc:HGNC:3526]
circRNA9418	0	0	12.9303	0	0	0	0	77.7124	66.2018	0	171.641	41.7645	-4.78839	down	0.034747	0.526136	yes	chr6	69737942	69790472	-	6	circRNA	ENST00000370577	LMBRD1	chr6:69719081-69737941|chr6:69790472-69796812	LMBR1 domain containing 1 [Source:HGNC Symbol;Acc:HGNC:23038]
circRNA10358	0	0	12.9303	0	0	0	0	46.6274	92.6825	31.552	34.3283	69.6074	-4.40955	down	0.034801	0.526136	yes	chr2	216678112	216679079	-	2	circRNA	ENST00000233813	IGFBP5	chr2:216676882-216678111|chr2:216679079-216694438	insulin like growth factor binding protein 5 [Source:HGNC Symbol;Acc:HGNC:5474]
circRNA6133	0	12.9249	0	13.959	31.4053	13.3348	46.453	139.882	39.7211	94.656	171.641	69.6074	-2.97195	down	0.034884	0.526136	yes	chr5	52861447	52865817	+	4	circRNA	ENST00000282588	ITGA1	chr5:52849485-52861446|chr5:52865817-52881872	integrin subunit alpha 1 [Source:HGNC Symbol;Acc:HGNC:6134]
circRNA18537	0	0	0	0	0	0	15.4843	46.6274	13.2404	31.552	34.3283	27.843	-inf	down	0.034894	0.526136	yes	chr1	112576986	112584126	-	5	circRNA	ENST00000361846	ST7L	chr1:112556018-112576985|chr1:112584126-112591524	suppression of tumorigenicity 7 like [Source:HGNC Symbol;Acc:HGNC:18441]
circRNA22041	0	0	0	0	0	0	0	15.5425	26.4807	21.0347	51.4924	69.6074	-inf	down	0.034894	0.526136	yes	chr3	46991840	46994553	+	4	circRNA	ENST00000450053	NBEAL2	chr3:46991688-46991839|chr3:46994553-46995031	neurobeachin like 2 [Source:HGNC Symbol;Acc:HGNC:31928]
circRNA16465	0	0	0	0	0	0	46.453	0	13.2404	52.5867	51.4924	13.9215	-inf	down	0.034913	0.526136	yes	chr11	103219915	103223086	+	4	circRNA	ENST00000375735	DYNC2H1	chr11:103215858-103219914|chr11:103223086-103231259	dynein cytoplasmic 2 heavy chain 1 [Source:HGNC Symbol;Acc:HGNC:2962]
circRNA21003	0	0	0	0	0	0	0	62.1699	26.4807	31.552	85.8206	0	-inf	down	0.034943	0.526136	yes	chr20	8722354	8739360	+	7	circRNA	ENST00000637919	PLCB1	chr20:8717848-8722353|chr20:8739360-8740343	phospholipase C beta 1 [Source:HGNC Symbol;Acc:HGNC:15917]
circRNA20757	0	0	0	0	0	0	0	46.6274	26.4807	31.552	68.6565	13.9215	-inf	down	0.035329	0.531407	yes	chr19	42005723	42006810	-	2	circRNA	ENST00000454993	GRIK5	chr19:42003683-42005722|chr19:42006810-42021300	glutamate ionotropic receptor kainate type subunit 5 [Source:HGNC Symbol;Acc:HGNC:4583]
circRNA8854	0	0	25.8605	13.959	0	0	46.453	46.6274	92.6825	73.6214	137.313	13.9215	-3.36625	down	0.03547	0.532986	yes	chr14	67685015	67690421	-	2	circRNA	ENST00000381346	RDH11	chr14:67678423-67685014|chr14:67690421-67691139	retinol dehydrogenase 11 (all-trans/9-cis/11-cis) [Source:HGNC Symbol;Acc:HGNC:17964]
circRNA2869	13.8891	51.6996	77.5816	0	47.1079	53.3393	46.453	341.935	172.125	147.243	326.118	194.901	-2.33453	down	0.035613	0.534592	yes	chr2	206127797	206130242	-	2	circRNA	ENST00000233190	NDUFS1	chr2:206126844-206127796|chr2:206130242-206132944	NADH:ubiquinone oxidoreductase core subunit S1 [Source:HGNC Symbol;Acc:HGNC:7707]
circRNA7970	0	129.249	64.6514	0	0	13.3348	15.4843	0	0	0	0	0	3.74239	up	0.035728	0.535248	yes	chr8	144190784	144200541	+	5	circRNA	ENST00000532255	MROH1	chr8:144180523-144190783|chr8:144200541-144220599	maestro heat like repeat family member 1 [Source:HGNC Symbol;Acc:HGNC:26958]
circRNA226	13.8891	0	0	0	15.7026	13.3348	46.453	62.1699	145.644	126.208	85.8206	13.9215	-3.48374	down	0.035729	0.535248	yes	chr12	49097566	49098105	-	2	circRNA	ENST00000553040	LMBR1L	chr12:49097261-49097565|chr12:49098105-49100387	limb development membrane protein 1 like [Source:HGNC Symbol;Acc:HGNC:18268]
circRNA16319	0	0	0	0	0	0	15.4843	15.5425	0	0	154.477	55.686	-inf	down	0.035952	0.537193	yes	chr12	99772922	99812311	-	6	circRNA	ENST00000547776	ANKS1B	chr12:99655210-99772921|chr12:99812311-99825308	ankyrin repeat and sterile alpha motif domain containing 1B [Source:HGNC Symbol;Acc:HGNC:24600]
circRNA3428	69.4453	38.7747	0	13.959	78.5132	53.3393	108.39	170.967	278.048	168.277	274.626	194.901	-2.23418	down	0.035957	0.537193	yes	chr9	125337018	125337591	+	2	circRNA	ENST00000497580	GAPVD1	chr9:125332629-125337017|chr9:125337591-125341176	GTPase activating protein and VPS9 domains 1 [Source:HGNC Symbol;Acc:HGNC:23375]
circRNA23312	0	0	0	0	0	0	0	62.1699	39.7211	0	51.4924	41.7645	-inf	down	0.035994	0.537193	yes	chr9	128267194	128268524	-	5	circRNA	ENST00000421699	GOLGA2	chr9:128266325-128267193|chr9:128268524-128273849	golgin A2 [Source:HGNC Symbol;Acc:HGNC:4425]
circRNA24141	0	0	0	0	0	0	0	0	26.4807	52.5867	34.3283	69.6074	-inf	down	0.036004	0.537193	yes	chr10	77039528	77079550	-	3	circRNA	ENST00000604624	KCNMA1	chr10:77027891-77039527|chr10:77079550-77084636	potassium calcium-activated channel subfamily M alpha 1 [Source:HGNC Symbol;Acc:HGNC:6284]
circRNA26609	0	0	0	0	0	0	0	0	52.9614	52.5867	17.1641	55.686	-inf	down	0.036136	0.538286	yes	chr9	96458379	96465778	+	3	circRNA	ENST00000375249	HABP4	chr9:96450628-96458378|chr9:96465778-96471010	hyaluronan binding protein 4 [Source:HGNC Symbol;Acc:HGNC:17062]
circRNA22691	0	0	0	0	0	0	0	15.5425	0	84.1387	51.4924	41.7645	-inf	down	0.03615	0.538286	yes	chr1	8465925	8541318	-	5	circRNA	ENST00000337907	RERE	chr1:8422807-8465924|chr1:8541318-8556474	arginine-glutamic acid dipeptide repeats [Source:HGNC Symbol;Acc:HGNC:9965]
circRNA221	55.5563	38.7747	64.6514	41.8771	62.8106	40.0045	92.9059	419.647	185.365	231.381	411.939	194.901	-2.33871	down	0.036415	0.541425	yes	chr12	45926142	45928859	-	1	circRNA	ENST00000369367	SCAF11	chr12:45925074-45926141|chr12:45928859-45931505	SR-related CTD associated factor 11 [Source:HGNC Symbol;Acc:HGNC:10784]
circRNA7833	0	12.9249	0	0	15.7026	13.3348	92.9059	62.1699	92.6825	73.6214	120.149	13.9215	-3.44012	down	0.036434	0.541425	yes	chr8	67118248	67137603	+	4	circRNA	ENST00000262210	CSPP1	chr8:67116122-67118247|chr8:67137603-67149782	centrosome and spindle pole associated protein 1 [Source:HGNC Symbol;Acc:HGNC:26193]
circRNA12007	0	0	0	27.9181	0	26.6697	232.265	108.797	0	31.552	188.805	55.686	-3.49887	down	0.036513	0.542055	yes	chr3	29868858	29899755	+	4	circRNA	ENST00000636680	RBMS3	chr3:29762989-29868857|chr3:29899755-29936085	RNA binding motif single stranded interacting protein 3 [Source:HGNC Symbol;Acc:HGNC:13427]
circRNA19921	0	0	0	0	0	0	0	46.6274	26.4807	21.0347	85.8206	13.9215	-inf	down	0.036626	0.542763	yes	chr17	7846400	7846740	+	2	circRNA	ENST00000254846	KDM6B	chr17:7846297-7846399|chr17:7846740-7846818	lysine demethylase 6B [Source:HGNC Symbol;Acc:HGNC:29012]
circRNA1710	13.8891	0	0	0	0	0	15.4843	31.085	52.9614	52.5867	68.6565	55.686	-4.31505	down	0.036634	0.542763	yes	chr7	94618758	94629841	-	4	circRNA	ENST00000265735	SGCE	chr7:94603452-94618757|chr7:94629841-94655989	sarcoglycan epsilon [Source:HGNC Symbol;Acc:HGNC:10808]
circRNA20329	0	0	0	0	0	0	0	46.6274	13.2404	0	34.3283	111.372	-inf	down	0.03669	0.543049	yes	chr15	34915038	34927138	-	4	circRNA	ENST00000156471	AQR	chr15:34910313-34915037|chr15:34927138-34930257	aquarius intron-binding spliceosomal factor [Source:HGNC Symbol;Acc:HGNC:29513]
circRNA12255	0	0	0	13.959	0	13.3348	77.4216	77.7124	79.4422	63.104	102.985	0	-3.87575	down	0.036747	0.543349	yes	chr1	15630325	15651895	+	6	circRNA	ENST00000480945	DDI2	chr1:15626798-15630324|chr1:15651895-15656616	DNA damage inducible 1 homolog 2 [Source:HGNC Symbol;Acc:HGNC:24578]
circRNA13224	0	0	0	0	31.4053	0	15.4843	62.1699	79.4422	63.104	137.313	0	-3.50892	down	0.036938	0.544165	yes	chr18	42027443	42049605	+	8	circRNA	ENST00000262039	PIK3C3	chr18:42020705-42027442|chr18:42049605-42057882	phosphatidylinositol 3-kinase catalytic subunit type 3 [Source:HGNC Symbol;Acc:HGNC:8974]
circRNA22401	0	0	0	0	0	0	0	77.7124	39.7211	31.552	17.1641	13.9215	-inf	down	0.036943	0.544165	yes	chr2	50620022	50623615	-	2	circRNA	ENST00000625672	NRXN1	chr2:50553025-50620021|chr2:50623615-50921868	neurexin 1 [Source:HGNC Symbol;Acc:HGNC:8008]
circRNA17853	0	0	0	0	0	0	46.453	77.7124	0	31.552	34.3283	0	-inf	down	0.036978	0.544165	yes	chr4	76144149	76144473	-	2	circRNA	ENST00000507257	NUP54	chr4:76134362-76144148|chr4:76144473-76148307	nucleoporin 54 [Source:HGNC Symbol;Acc:HGNC:17359]
circRNA4726	0	25.8498	12.9303	41.8771	0	40.0045	0	0	0	10.5173	0	0	3.52013	up	0.036982	0.544165	yes	chr16	297056	298251	-	2	circRNA	ENST00000461023	AXIN1	chr16:293718-297055|chr16:298251-304303	axin 1 [Source:HGNC Symbol;Acc:HGNC:903]
circRNA7095	0	38.7747	51.7211	0	0	0	0	186.51	158.884	231.381	102.985	0	-2.9091	down	0.036986	0.544165	yes	chr2	201760881	201761818	-	1	circRNA	ENST00000264276	ALS2	chr2:201757759-201760880|chr2:201761818-201767228	ALS2, alsin Rho guanine nucleotide exchange factor [Source:HGNC Symbol;Acc:HGNC:443]
circRNA3116	27.7781	0	64.6514	0	0	13.3348	0	0	0	0	0	0	inf	up	0.037324	0.548592	yes	chr1	90937485	90982370	-	3	circRNA	ENST00000370440	ZNF644	chr1:90918154-90937484|chr1:90982370-91021272	zinc finger protein 644 [Source:HGNC Symbol;Acc:HGNC:29222]
circRNA2548	13.8891	38.7747	12.9303	27.9181	0	0	0	0	0	0	0	0	inf	up	0.037621	0.552409	yes	chr3	170113360	170149244	-	7	circRNA	ENST00000495893	PHC3	chr3:170106946-170113359|chr3:170149244-170171372	polyhomeotic homolog 3 [Source:HGNC Symbol;Acc:HGNC:15682]
circRNA18419	0	0	0	0	0	0	30.9686	62.1699	26.4807	21.0347	34.3283	0	-inf	down	0.037775	0.553771	yes	chr1	15534237	15536814	+	2	circRNA	ENST00000375838	DNAJC16	chr1:15529272-15534236|chr1:15536814-15544398	DnaJ heat shock protein family (Hsp40) member C16 [Source:HGNC Symbol;Acc:HGNC:29157]
circRNA3531	166.669	0	0	0	15.7026	13.3348	15.4843	0	0	0	0	0	3.65981	up	0.037815	0.553771	yes	chr8	70674818	70707153	+	4	circRNA	ENST00000520092	XKR9	chr8:70669538-70674817|chr8:70707153-70733795	XK related 9 [Source:HGNC Symbol;Acc:HGNC:20937]
circRNA2688	83.3344	142.174	90.5119	0	0	186.688	185.812	481.817	211.846	189.312	205.97	445.488	-1.77482	down	0.037826	0.553771	yes	chr2	61522611	61526521	-	2	circRNA	ENST00000401558	XPO1	chr2:61502310-61522610|chr2:61526521-61533771	exportin 1 [Source:HGNC Symbol;Acc:HGNC:12825]
circRNA27451	0	0	0	0	0	0	0	0	0	105.173	171.641	0	-inf	down	0.037905	0.553861	yes	chr17	1842803	1844686	+	3	circRNA	ENST00000571058	RPA1	chr17:1829900-1842802|chr17:1844686-1853100	replication protein A1 [Source:HGNC Symbol;Acc:HGNC:10289]
circRNA4006	0	25.8498	12.9303	0	31.4053	0	46.453	77.7124	79.4422	73.6214	154.477	83.5289	-2.87599	down	0.037907	0.553861	yes	chr12	113267843	113269845	+	3	circRNA	ENST00000335509	TPCN1	chr12:113266356-113267842|chr12:113269845-113272657	two pore segment channel 1 [Source:HGNC Symbol;Acc:HGNC:18182]
circRNA19669	0	0	0	0	0	0	0	31.085	79.4422	10.5173	51.4924	13.9215	-inf	down	0.03798	0.554381	yes	chr10	24495147	24545103	+	10	circRNA	ENST00000376462	KIAA1217	chr10:24494604-24495146|chr10:24545103-24545826	KIAA1217 [Source:HGNC Symbol;Acc:HGNC:25428]
circRNA19849	0	0	0	0	0	0	0	15.5425	92.6825	10.5173	0	69.6074	-inf	down	0.038057	0.554768	yes	chr10	110881233	110890670	+	6	circRNA	ENST00000393104	PDCD4	chr10:110876753-110881232|chr10:110890670-110894090	programmed cell death 4 [Source:HGNC Symbol;Acc:HGNC:8763]
circRNA2509	41.6672	129.249	38.7908	139.59	78.5132	26.6697	30.9686	481.817	423.692	315.52	377.611	389.802	-2.15164	down	0.03809	0.554768	yes	chr3	134175609	134195182	-	7	circRNA	ENST00000460933	RYK	chr3:134159373-134175608|chr3:134195182-134202729	receptor-like tyrosine kinase [Source:HGNC Symbol;Acc:HGNC:10481]
circRNA1367	27.7781	12.9249	155.163	13.959	0	0	77.4216	233.137	145.644	105.173	171.641	83.5289	-1.96035	down	0.038119	0.554768	yes	chr18	49331864	49379758	-	5	circRNA	ENST00000269445	DYM	chr18:49286616-49331863|chr18:49379758-49391592	dymeclin [Source:HGNC Symbol;Acc:HGNC:21317]
circRNA14362	0	0	0	0	0	13.3348	30.9686	31.085	52.9614	42.0693	85.8206	27.843	-4.34368	down	0.038241	0.555997	yes	chr12	31442775	31447769	-	2	circRNA	ENST00000389082	DENND5B	chr12:31433248-31442774|chr12:31447769-31451939	DENN domain containing 5B [Source:HGNC Symbol;Acc:HGNC:28338]
circRNA4047	0	38.7747	0	0	0	0	77.4216	202.052	13.2404	21.0347	102.985	0	-3.42594	down	0.038332	0.556773	yes	chr12	128814775	128815070	-	1	circRNA	ENST00000266771	SLC15A4	chr12:128810111-128814774|chr12:128815070-128823397	solute carrier family 15 member 4 [Source:HGNC Symbol;Acc:HGNC:23090]
circRNA2880	13.8891	0	0	0	0	0	0	139.882	39.7211	52.5867	34.3283	55.686	-4.53595	down	0.038424	0.557393	yes	chr2	213310059	213375119	+	6	circRNA	ENST00000272898	SPAG16	chr2:213297357-213310058|chr2:213375119-213375207	sperm associated antigen 16 [Source:HGNC Symbol;Acc:HGNC:23225]
circRNA2176	55.5563	64.6245	38.7908	13.959	78.5132	0	15.4843	217.595	397.211	147.243	343.283	222.744	-2.41775	down	0.03845	0.557393	yes	chr5	176943335	176958154	-	4	circRNA	ENST00000377227	UIMC1	chr5:176911389-176943334|chr5:176958154-176968554	ubiquitin interaction motif containing 1 [Source:HGNC Symbol;Acc:HGNC:30298]
circRNA3635	0	129.249	38.7908	41.8771	15.7026	26.6697	0	15.5425	0	21.0347	0	41.7645	1.68723	up	0.038538	0.558122	yes	chrX	2953143	2958435	-	3	circRNA	ENST00000545496	ARSE	chrX:2949727-2953142|chrX:2958435-2959602	arylsulfatase E (chondrodysplasia punctata 1) [Source:HGNC Symbol;Acc:HGNC:719]
circRNA10565	0	0	12.9303	0	15.7026	0	0	77.7124	66.2018	94.656	85.8206	41.7645	-3.67671	down	0.038642	0.559081	yes	chr1	151088190	151107222	+	6	circRNA	ENST00000368918	GABPB2	chr1:151070934-151088189|chr1:151107222-151117391	GA binding protein transcription factor beta subunit 2 [Source:HGNC Symbol;Acc:HGNC:28441]
circRNA17412	0	0	0	0	0	0	15.4843	0	13.2404	0	85.8206	97.4504	-inf	down	0.038717	0.559619	yes	chr7	80789306	80828745	-	10	circRNA	ENST00000265361	SEMA3C	chr7:80765243-80789305|chr7:80828745-80916678	semaphorin 3C [Source:HGNC Symbol;Acc:HGNC:10725]
circRNA1763	41.6672	38.7747	12.9303	0	31.4053	13.3348	30.9686	155.425	79.4422	115.691	257.462	250.587	-2.68727	down	0.038776	0.55987	yes	chr7	130120749	130122202	+	2	circRNA	ENST00000335420	KLHDC10	chr7:130116666-130120748|chr7:130122202-130124450	kelch domain containing 10 [Source:HGNC Symbol;Acc:HGNC:22194]
circRNA18501	0	0	0	0	0	0	30.9686	77.7124	39.7211	0	17.1641	13.9215	-inf	down	0.03881	0.55987	yes	chr1	77044204	77050365	+	2	circRNA	ENST00000477717	ST6GALNAC5	chr1:76868742-77044203|chr1:77050365-77062974	ST6 N-acetylgalactosaminide alpha-2,6-sialyltransferase 5 [Source:HGNC Symbol;Acc:HGNC:19342]
circRNA11287	0	0	0	13.959	0	0	0	46.6274	13.2404	84.1387	51.4924	83.5289	-4.32114	down	0.038889	0.560464	yes	chr16	3791981	3793626	-	2	circRNA	ENST00000262367	CREBBP	chr16:3782926-3791980|chr16:3793626-3810602	CREB binding protein [Source:HGNC Symbol;Acc:HGNC:2348]
circRNA181	27.7781	51.6996	12.9303	41.8771	31.4053	0	15.4843	202.052	251.567	136.725	257.462	139.215	-2.59705	down	0.038965	0.561013	yes	chr12	12244262	12244655	-	1	circRNA	ENST00000261349	LRP6	chr12:12203400-12244261|chr12:12244655-12266680	LDL receptor related protein 6 [Source:HGNC Symbol;Acc:HGNC:6698]
circRNA23092	0	0	0	0	0	0	0	62.1699	13.2404	10.5173	17.1641	83.5289	-inf	down	0.039041	0.561561	yes	chr1	225554906	225567414	-	2	circRNA	ENST00000366844	ENAH	chr1:225530638-225554905|chr1:225567414-225652685	ENAH, actin regulator [Source:HGNC Symbol;Acc:HGNC:18271]
circRNA16343	0	0	0	0	0	0	30.9686	31.085	26.4807	0	85.8206	13.9215	-inf	down	0.039125	0.562222	yes	chr12	112178931	112179397	-	2	circRNA	ENST00000550722	HECTD4	chr12:112176702-112178930|chr12:112179397-112183058	HECT domain E3 ubiquitin protein ligase 4 [Source:HGNC Symbol;Acc:HGNC:26611]
circRNA3887	0	116.324	12.9303	27.9181	78.5132	66.6741	30.9686	233.137	436.932	147.243	446.267	153.136	-2.25941	down	0.039182	0.562495	yes	chr12	46229153	46243314	-	4	circRNA	ENST00000398637	SLC38A1	chr12:46209127-46229152|chr12:46243314-46268525	solute carrier family 38 member 1 [Source:HGNC Symbol;Acc:HGNC:13447]
circRNA17137	0	0	0	0	0	0	123.875	0	0	42.0693	0	27.843	-inf	down	0.039234	0.562696	yes	chr19	37425868	37426378	-	2	circRNA	ENST00000392149	ZNF569	chr19:37414419-37425867|chr19:37426378-37444906	zinc finger protein 569 [Source:HGNC Symbol;Acc:HGNC:24737]
circRNA13863	0	0	0	0	15.7026	0	0	15.5425	66.2018	52.5867	51.4924	111.372	-4.24233	down	0.039272	0.562696	yes	chr2	219451136	219464608	+	5	circRNA	ENST00000312358	SPEG	chr2:219449271-219451135|chr2:219464608-219467173	SPEG complex locus [Source:HGNC Symbol;Acc:HGNC:16901]
circRNA1233	27.7781	258.498	181.024	27.9181	0	133.348	15.4843	15.5425	39.7211	52.5867	137.313	41.7645	1.05555	up	0.039481	0.565143	yes	chr14	96833467	96860735	+	10	circRNA	ENST00000216639	VRK1	chr14:96797447-96833466|chr14:96860735-96876029	vaccinia related kinase 1 [Source:HGNC Symbol;Acc:HGNC:12718]
circRNA16224	0	0	0	0	0	0	30.9686	0	13.2404	31.552	51.4924	41.7645	-inf	down	0.039537	0.565398	yes	chr12	6587384	6588422	-	3	circRNA	ENST00000544484	CHD4	chr12:6583378-6587383|chr12:6588422-6591465	chromodomain helicase DNA binding protein 4 [Source:HGNC Symbol;Acc:HGNC:1919]
circRNA19644	0	0	0	0	0	0	0	46.6274	39.7211	0	0	111.372	-inf	down	0.039587	0.565567	yes	chr10	7615982	7655675	-	6	circRNA	ENST00000397146	ITIH5	chr10:7586069-7615981|chr10:7655675-7666802	inter-alpha-trypsin inhibitor heavy chain family member 5 [Source:HGNC Symbol;Acc:HGNC:21449]
circRNA3692	0	12.9249	51.7211	13.959	0	13.3348	0	0	0	0	0	0	inf	up	0.039757	0.567448	yes	chrX	118741017	118766976	+	7	circRNA	ENST00000371666	IL13RA1	chrX:118727726-118741016|chrX:118766976-118773878	interleukin 13 receptor subunit alpha 1 [Source:HGNC Symbol;Acc:HGNC:5974]
circRNA1037	27.7781	51.6996	12.9303	13.959	15.7026	40.0045	185.812	62.1699	132.404	147.243	154.477	208.822	-2.45865	down	0.039825	0.567552	yes	chr15	63696124	63716473	-	6	circRNA	ENST00000443617	HERC1	chr15:63694894-63696123|chr15:63716473-63718573	HECT and RLD domain containing E3 ubiquitin protein ligase family member 1 [Source:HGNC Symbol;Acc:HGNC:4867]
circRNA18994	0	0	0	0	0	0	0	77.7124	13.2404	42.0693	34.3283	13.9215	-inf	down	0.039841	0.567552	yes	chrX	153693263	153693586	+	2	circRNA	ENST00000253122	SLC6A8	chrX:153693175-153693262|chrX:153693586-153693904	solute carrier family 6 member 8 [Source:HGNC Symbol;Acc:HGNC:11055]
circRNA7043	0	25.8498	25.8605	41.8771	0	13.3348	46.453	77.7124	66.2018	157.76	205.97	153.136	-2.72562	down	0.040117	0.570727	yes	chr2	171028339	171046362	-	2	circRNA	ENST00000360843	TLK1	chr2:171014948-171028338|chr2:171046362-171049813	tousled like kinase 1 [Source:HGNC Symbol;Acc:HGNC:11841]
circRNA19083	0	0	0	0	0	0	0	93.2549	0	0	17.1641	111.372	-inf	down	0.040141	0.570727	yes	chr13	75560753	75569507	+	4	circRNA	ENST00000618773	UCHL3	chr13:75549682-75560752|chr13:75569507-75594914	ubiquitin C-terminal hydrolase L3 [Source:HGNC Symbol;Acc:HGNC:12515]
circRNA4458	0	38.7747	25.8605	0	15.7026	13.3348	0	0	0	0	0	0	inf	up	0.040181	0.570748	yes	chr10	110124017	110132400	+	5	circRNA	ENST00000356080	ADD3	chr10:110122292-110124016|chr10:110132400-110133325	adducin 3 [Source:HGNC Symbol;Acc:HGNC:245]
circRNA836	83.3344	116.324	38.7908	13.959	31.4053	13.3348	108.39	295.307	251.567	241.899	205.97	153.136	-2.07989	down	0.040598	0.576118	yes	chr16	11020193	11061022	+	8	circRNA	ENST00000409790	CLEC16A	chr16:11003305-11020192|chr16:11061022-11120614	C-type lectin domain containing 16A [Source:HGNC Symbol;Acc:HGNC:29013]
circRNA19120	0	0	0	0	0	0	0	93.2549	26.4807	0	51.4924	27.843	-inf	down	0.040867	0.578101	yes	chr13	113835513	113838191	-	2	circRNA	ENST00000327773	GAS6	chr13:113834672-113835512|chr13:113838191-113839727	growth arrest specific 6 [Source:HGNC Symbol;Acc:HGNC:4168]
circRNA4483	0	25.8498	0	0	0	0	30.9686	62.1699	26.4807	84.1387	34.3283	55.686	-3.50647	down	0.040879	0.578101	yes	chr10	124706636	124706887	-	1	circRNA	ENST00000494792	AC068896.1	chr10:124696212-124706635|chr10:124706887-124760385	NA
circRNA23384	0	0	0	0	0	0	0	31.085	52.9614	73.6214	17.1641	0	-inf	down	0.040911	0.578101	yes	chr8	26391243	26408376	+	4	circRNA	ENST00000380629	BNIP3L	chr8:26383230-26391242|chr8:26408376-26410363	BCL2 interacting protein 3 like [Source:HGNC Symbol;Acc:HGNC:1085]
circRNA518	13.8891	90.4743	64.6514	97.7132	78.5132	53.3393	325.171	310.85	132.404	147.243	583.58	320.194	-2.19055	down	0.040913	0.578101	yes	chr10	17704431	17705741	+	3	circRNA	ENST00000377524	STAM	chr10:17700279-17704430|chr10:17705741-17708775	signal transducing adaptor molecule [Source:HGNC Symbol;Acc:HGNC:11357]
circRNA2996	97.2234	77.5494	77.5816	55.8361	94.2159	53.3393	201.296	450.732	211.846	241.899	514.924	320.194	-2.09042	down	0.040933	0.578101	yes	chr1	29154696	29154910	-	1	circRNA	ENST00000373795	SRSF4	chr1:29150192-29154695|chr1:29154910-29159373	serine and arginine rich splicing factor 4 [Source:HGNC Symbol;Acc:HGNC:10786]
circRNA1514	69.4453	38.7747	142.233	83.7542	94.2159	106.679	340.655	341.935	225.086	210.347	600.744	431.566	-2.00668	down	0.041087	0.579325	yes	chr21	15762891	15766141	+	2	circRNA	ENST00000285679	USP25	chr21:15730438-15762890|chr21:15766141-15777903	ubiquitin specific peptidase 25 [Source:HGNC Symbol;Acc:HGNC:12624]
circRNA189	13.8891	64.6245	0	0	0	26.6697	61.9373	108.797	66.2018	136.725	154.477	83.5289	-2.53984	down	0.041098	0.579325	yes	chr12	19462510	19473355	+	2	circRNA	ENST00000538425	AEBP2	chr12:19404216-19462509|chr12:19473355-19493799	AE binding protein 2 [Source:HGNC Symbol;Acc:HGNC:24051]
circRNA18372	0	0	0	0	0	0	15.4843	31.085	26.4807	0	17.1641	83.5289	-inf	down	0.041197	0.580168	yes	chr2	219566830	219568324	-	4	circRNA	ENST00000465149	OBSL1	chr2:219565514-219566829|chr2:219568324-219570220	obscurin like 1 [Source:HGNC Symbol;Acc:HGNC:29092]
circRNA1606	69.4453	51.6996	193.954	27.9181	47.1079	13.3348	30.9686	46.6274	13.2404	0	51.4924	41.7645	1.13199	up	0.041237	0.58018	yes	chr7	24623666	24668660	+	8	circRNA	ENST00000222644	MPP6	chr7:24573593-24623665|chr7:24668660-24679130	membrane palmitoylated protein 6 [Source:HGNC Symbol;Acc:HGNC:18167]
circRNA695	13.8891	0	0	0	0	0	46.453	0	92.6825	21.0347	102.985	27.843	-4.38899	down	0.041317	0.580753	yes	chr17	28921688	28927063	-	3	circRNA	ENST00000332830	PHF12	chr17:28919275-28921687|chr17:28927063-28950064	PHD finger protein 12 [Source:HGNC Symbol;Acc:HGNC:20816]
circRNA6734	0	12.9249	0	0	0	0	0	170.967	13.2404	63.104	0	55.686	-4.55108	down	0.041423	0.581532	yes	chr3	152445282	152447773	+	3	circRNA	ENST00000282486	MBNL1	chr3:152432920-152445281|chr3:152447773-152456266	muscleblind like splicing regulator 1 [Source:HGNC Symbol;Acc:HGNC:6923]
circRNA18840	0	0	0	0	0	0	15.4843	15.5425	39.7211	73.6214	0	13.9215	-inf	down	0.041451	0.581532	yes	chr8	100264034	100288267	-	6	circRNA	ENST00000519449	RNF19A	chr8:100261755-100264033|chr8:100288267-100300527	ring finger protein 19A, RBR E3 ubiquitin protein ligase [Source:HGNC Symbol;Acc:HGNC:13432]
circRNA20182	0	0	0	0	0	0	0	108.797	13.2404	21.0347	17.1641	27.843	-inf	down	0.041696	0.584415	yes	chr16	16079352	16102717	+	5	circRNA	ENST00000399410	ABCC1	chr16:16076401-16079351|chr16:16102717-16106737	ATP binding cassette subfamily C member 1 [Source:HGNC Symbol;Acc:HGNC:51]
circRNA10829	0	0	12.9303	0	0	0	0	93.2549	105.923	10.5173	0	83.5289	-4.50318	down	0.041778	0.585011	yes	chr8	39090047	39091346	+	2	circRNA	ENST00000487273	ADAM9	chr8:39083073-39090046|chr8:39091346-39101862	ADAM metallopeptidase domain 9 [Source:HGNC Symbol;Acc:HGNC:216]
circRNA17080	0	0	0	0	0	0	30.9686	0	0	10.5173	68.6565	83.5289	-inf	down	0.042084	0.588738	yes	chr14	88416711	88433212	+	6	circRNA	ENST00000556553	SPATA7	chr14:88396203-88416710|chr14:88433212-88437542	spermatogenesis associated 7 [Source:HGNC Symbol;Acc:HGNC:20423]
circRNA11350	0	0	0	27.9181	0	0	46.453	77.7124	119.163	42.0693	51.4924	0	-3.59301	down	0.042192	0.589692	yes	chr16	84740309	84745673	+	2	circRNA	ENST00000219473	USP10	chr16:84733503-84740308|chr16:84745673-84758715	ubiquitin specific peptidase 10 [Source:HGNC Symbol;Acc:HGNC:12608]
circRNA7195	0	38.7747	64.6514	27.9181	62.8106	53.3393	201.296	279.765	185.365	126.208	274.626	111.372	-2.25165	down	0.042388	0.591872	yes	chr1	20770930	20773610	-	2	circRNA	ENST00000312239	HP1BP3	chr1:20767664-20770929|chr1:20773610-20776596	heterochromatin protein 1 binding protein 3 [Source:HGNC Symbol;Acc:HGNC:24973]
circRNA7129	0	12.9249	0	0	0	0	30.9686	62.1699	13.2404	52.5867	154.477	0	-4.59998	down	0.04251	0.592944	yes	chr2	218656150	218656463	-	1	circRNA	ENST00000449707	ZNF142	chr2:218650526-218656149|chr2:218656463-218658700	zinc finger protein 142 [Source:HGNC Symbol;Acc:HGNC:12927]
circRNA29208	0	0	0	0	0	0	0	0	0	10.5173	51.4924	180.979	-inf	down	0.042568	0.592944	yes	chr2	217425302	217478558	-	6	circRNA	ENST00000474063	DIRC3	chr2:217328152-217425301|chr2:217478558-217599611	disrupted in renal carcinoma 3 [Source:HGNC Symbol;Acc:HGNC:17805]
circRNA10824	0	0	38.7908	0	31.4053	0	61.9373	0	79.4422	63.104	274.626	69.6074	-2.9666	down	0.042588	0.592944	yes	chr8	27525362	27536855	+	2	circRNA	ENST00000521400	EPHX2	chr8:27522508-27525361|chr8:27536855-27538658	epoxide hydrolase 2 [Source:HGNC Symbol;Acc:HGNC:3402]
circRNA1919	41.6672	12.9249	0	13.959	0	13.3348	92.9059	46.6274	52.9614	147.243	205.97	55.686	-2.87662	down	0.042625	0.592944	yes	chr6	104744160	104750472	-	3	circRNA	ENST00000262903	HACE1	chr6:104730416-104744159|chr6:104750472-104771192	HECT domain and ankyrin repeat containing E3 ubiquitin protein ligase 1 [Source:HGNC Symbol;Acc:HGNC:21033]
circRNA7565	0	206.799	232.745	237.304	0	0	170.328	310.85	251.567	283.968	274.626	598.624	-1.48146	down	0.042728	0.593819	yes	chr9	6880012	6893232	+	3	circRNA	ENST00000536108	KDM4C	chr9:6849700-6880011|chr9:6893232-6980924	lysine demethylase 4C [Source:HGNC Symbol;Acc:HGNC:17071]
circRNA4121	0	25.8498	64.6514	0	31.4053	26.6697	0	0	0	0	0	27.843	2.41582	up	0.042881	0.594562	yes	chr11	46312325	46312919	+	3	circRNA	ENST00000621158	CREB3L1	chr11:46311189-46312324|chr11:46312919-46316285	cAMP responsive element binding protein 3 like 1 [Source:HGNC Symbol;Acc:HGNC:18856]
circRNA2100	13.8891	38.7747	12.9303	0	0	26.6697	0	0	0	0	0	0	inf	up	0.042883	0.594562	yes	chr5	96722639	96729725	+	5	circRNA	ENST00000505143	CAST	chr5:96695907-96722638|chr5:96729725-96730779	calpastatin [Source:HGNC Symbol;Acc:HGNC:1515]
circRNA12650	0	0	0	0	31.4053	0	61.9373	0	52.9614	0	102.985	167.058	-3.61556	down	0.042902	0.594562	yes	chr12	102039868	102046119	-	3	circRNA	ENST00000538761	WASHC3	chr12:102026038-102039867|chr12:102046119-102048289	WASH complex subunit 3 [Source:HGNC Symbol;Acc:HGNC:24256]
circRNA8523	0	0	12.9303	0	0	13.3348	30.9686	108.797	39.7211	42.0693	85.8206	41.7645	-3.73259	down	0.042979	0.595072	yes	chr17	12081356	12113360	+	5	circRNA	ENST00000353533	MAP2K4	chr17:12054991-12081355|chr17:12113360-12125293	mitogen-activated protein kinase kinase 4 [Source:HGNC Symbol;Acc:HGNC:6844]
circRNA3493	97.2234	51.6996	116.372	27.9181	47.1079	0	263.233	295.307	172.125	157.76	223.134	236.665	-1.98609	down	0.043025	0.595136	yes	chr8	47284028	47294030	+	3	circRNA	ENST00000297423	SPIDR	chr8:47280017-47284027|chr8:47294030-47396375	scaffolding protein involved in DNA repair [Source:HGNC Symbol;Acc:HGNC:28971]
circRNA7892	0	51.6996	38.7908	41.8771	0	0	0	0	0	10.5173	0	0	3.65371	up	0.043064	0.595136	yes	chr8	100220279	100233537	+	4	circRNA	ENST00000251809	SPAG1	chr8:100213918-100220278|chr8:100233537-100239239	sperm associated antigen 1 [Source:HGNC Symbol;Acc:HGNC:11212]
circRNA21005	0	0	0	0	0	0	0	46.6274	26.4807	10.5173	68.6565	27.843	-inf	down	0.043293	0.597742	yes	chr20	8740344	8741573	+	2	circRNA	ENST00000637919	PLCB1	chr20:8739360-8740343|chr20:8741573-8757045	phospholipase C beta 1 [Source:HGNC Symbol;Acc:HGNC:15917]
circRNA16681	0	0	0	0	0	0	46.453	31.085	39.7211	0	34.3283	13.9215	-inf	down	0.043349	0.597814	yes	chr17	29648144	29672129	-	6	circRNA	ENST00000269033	SSH2	chr17:29636802-29648143|chr17:29672129-29676819	slingshot protein phosphatase 2 [Source:HGNC Symbol;Acc:HGNC:30580]
circRNA2387	13.8891	0	0	0	0	0	61.9373	62.1699	39.7211	21.0347	85.8206	0	-4.28459	down	0.043379	0.597814	yes	chr3	9453739	9464672	+	2	circRNA	ENST00000402198	SETD5	chr3:9448630-9453738|chr3:9464672-9470458	SET domain containing 5 [Source:HGNC Symbol;Acc:HGNC:25566]
circRNA6824	0	25.8498	0	0	0	0	61.9373	62.1699	92.6825	52.5867	0	27.843	-3.5233	down	0.043543	0.59854	yes	chr2	23958301	23984831	+	6	circRNA	ENST00000446425	UBXN2A	chr2:23927615-23958300|chr2:23984831-23999671	UBX domain protein 2A [Source:HGNC Symbol;Acc:HGNC:27265]
circRNA9212	0	0	12.9303	0	0	0	0	155.425	0	52.5867	34.3283	125.293	-4.82944	down	0.043552	0.59854	yes	chr7	919968	935505	-	3	circRNA	ENST00000611167	ADAP1	chr7:905172-919967|chr7:935505-945761	ArfGAP with dual PH domains 1 [Source:HGNC Symbol;Acc:HGNC:16486]
circRNA18887	0	0	0	0	0	0	0	31.085	39.7211	42.0693	17.1641	27.843	-inf	down	0.043553	0.59854	yes	chrX	10090771	10098579	+	3	circRNA	ENST00000380861	WWC3	chrX:10079804-10090770|chrX:10098579-10109777	WWC family member 3 [Source:HGNC Symbol;Acc:HGNC:29237]
circRNA16643	0	0	0	0	0	0	46.453	31.085	13.2404	21.0347	0	41.7645	-inf	down	0.043939	0.603285	yes	chr17	819439	826078	-	4	circRNA	ENST00000575801	NXN	chr17:805247-819438|chr17:826078-864014	nucleoredoxin [Source:HGNC Symbol;Acc:HGNC:18008]
circRNA4559	0	25.8498	12.9303	0	0	0	61.9373	108.797	26.4807	52.5867	51.4924	69.6074	-3.25765	down	0.044066	0.604141	yes	chr17	34983002	34986131	+	2	circRNA	ENST00000378526	LIG3	chr17:34980622-34983001|chr17:34986131-34989465	DNA ligase 3 [Source:HGNC Symbol;Acc:HGNC:6600]
circRNA18358	0	0	0	0	0	0	15.4843	15.5425	79.4422	10.5173	0	41.7645	-inf	down	0.044083	0.604141	yes	chr2	205401013	205440672	+	2	circRNA	ENST00000406610	PARD3B	chr2:205301701-205401012|chr2:205440672-205499895	par-3 family cell polarity regulator beta [Source:HGNC Symbol;Acc:HGNC:14446]
circRNA7498	0	64.6245	0	0	0	0	15.4843	31.085	66.2018	136.725	102.985	55.686	-2.65901	down	0.044311	0.606408	yes	chr1	215586495	215595471	+	2	circRNA	ENST00000259154	KCTD3	chr1:215579999-215586494|chr1:215595471-215601866	potassium channel tetramerization domain containing 3 [Source:HGNC Symbol;Acc:HGNC:21305]
circRNA305	13.8891	38.7747	25.8605	41.8771	31.4053	26.6697	61.9373	217.595	158.884	168.277	171.641	167.058	-2.40518	down	0.044372	0.606408	yes	chr12	120557282	120557682	+	2	circRNA	ENST00000325954	RNF10	chr12:120554808-120557281|chr12:120557682-120560725	ring finger protein 10 [Source:HGNC Symbol;Acc:HGNC:10055]
circRNA20865	0	0	0	0	0	0	0	46.6274	52.9614	10.5173	85.8206	0	-inf	down	0.044458	0.606408	yes	chr18	54280667	54287411	+	4	circRNA	ENST00000579534	POLI	chr18:54277855-54280666|chr18:54287411-54291832	DNA polymerase iota [Source:HGNC Symbol;Acc:HGNC:9182]
circRNA2257	13.8891	25.8498	0	0	47.1079	160.018	216.781	202.052	79.4422	94.656	188.805	111.372	-1.85511	down	0.044562	0.606408	yes	chr4	53414615	53428183	+	3	circRNA	ENST00000337488	FIP1L1	chr4:53399839-53414614|chr4:53428183-53442652	factor interacting with PAPOLA and CPSF1 [Source:HGNC Symbol;Acc:HGNC:19124]
circRNA20964	0	0	0	0	0	0	0	77.7124	26.4807	0	85.8206	13.9215	-inf	down	0.044576	0.606408	yes	chr22	41125864	41130003	+	3	circRNA	ENST00000263253	EP300	chr22:41117821-41125863|chr22:41130003-41131387	E1A binding protein p300 [Source:HGNC Symbol;Acc:HGNC:3373]
circRNA6719	0	12.9249	0	0	0	0	0	108.797	13.2404	31.552	51.4924	69.6074	-4.40958	down	0.044602	0.606408	yes	chr3	141260123	141287453	+	4	circRNA	ENST00000636601	PXYLP1	chr3:141231911-141260122|chr3:141287453-141305755	2-phosphoxylose phosphatase 1 [Source:HGNC Symbol;Acc:HGNC:26303]
circRNA5259	0	103.399	64.6514	0	62.8106	0	61.9373	202.052	145.644	189.312	223.134	111.372	-2.01555	down	0.044637	0.606408	yes	chr14	103662116	103662927	+	2	circRNA	ENST00000472726	AL139300.1	chr14:103657776-103662115|chr14:103662927-103669510	NA
circRNA4430	0	38.7747	0	55.8361	47.1079	80.009	0	0	0	31.552	51.4924	0	1.41683	up	0.044638	0.606408	yes	chr10	97743094	97744915	+	2	circRNA	ENST00000393677	ZFYVE27	chr10:97738674-97743093|chr10:97744915-97748268	zinc finger FYVE-type containing 27 [Source:HGNC Symbol;Acc:HGNC:26559]
circRNA2325	13.8891	0	0	0	0	0	30.9686	77.7124	39.7211	10.5173	120.149	13.9215	-4.39883	down	0.044653	0.606408	yes	chr4	107682015	107701285	-	4	circRNA	ENST00000265174	PAPSS1	chr4:107660072-107682014|chr4:107701285-107720119	3'-phosphoadenosine 5'-phosphosulfate synthase 1 [Source:HGNC Symbol;Acc:HGNC:8603]
circRNA2667	13.8891	0	0	0	0	0	77.4216	0	79.4422	31.552	34.3283	27.843	-4.17329	down	0.044742	0.606408	yes	chr2	48461138	48465642	+	3	circRNA	ENST00000431614	PPP1R21	chr2:48460153-48461137|chr2:48465642-48471086	protein phosphatase 1 regulatory subunit 21 [Source:HGNC Symbol;Acc:HGNC:30595]
circRNA8730	0	0	12.9303	0	0	0	0	62.1699	26.4807	31.552	85.8206	83.5289	-4.485	down	0.044756	0.606408	yes	chr15	72007826	72027793	-	5	circRNA	ENST00000356056	MYO9A	chr15:71999940-72007825|chr15:72027793-72032493	myosin IXA [Source:HGNC Symbol;Acc:HGNC:7608]
circRNA6361	0	64.6245	25.8605	0	0	13.3348	0	0	0	0	0	0	inf	up	0.044802	0.606408	yes	chr4	6923373	6967424	+	2	circRNA	ENST00000448507	TBC1D14	chr4:6909505-6923372|chr4:6967424-6994183	TBC1 domain family member 14 [Source:HGNC Symbol;Acc:HGNC:29246]
circRNA18712	0	0	0	0	0	0	30.9686	62.1699	26.4807	0	68.6565	0	-inf	down	0.044821	0.606408	yes	chr9	87698656	87700237	+	2	circRNA	ENST00000358077	DAPK1	chr9:87697204-87698655|chr9:87700237-87703028	death associated protein kinase 1 [Source:HGNC Symbol;Acc:HGNC:2674]
circRNA1433	27.7781	25.8498	51.7211	69.7952	0	53.3393	30.9686	233.137	397.211	136.725	326.118	139.215	-2.46712	down	0.044822	0.606408	yes	chr22	45729425	45740538	+	3	circRNA	ENST00000381061	ATXN10	chr22:45718493-45729424|chr22:45740538-45806958	ataxin 10 [Source:HGNC Symbol;Acc:HGNC:10549]
circRNA1946	55.5563	25.8498	64.6514	0	0	40.0045	325.171	186.51	172.125	63.104	171.641	41.7645	-2.36772	down	0.044911	0.606652	yes	chr6	130955105	130956499	-	2	circRNA	ENST00000528282	EPB41L2	chr6:130926709-130955104|chr6:130956499-131000619	erythrocyte membrane protein band 4.1 like 2 [Source:HGNC Symbol;Acc:HGNC:3379]
circRNA480	13.8891	0	0	0	0	13.3348	46.453	46.6274	66.2018	21.0347	34.3283	97.4504	-3.51904	down	0.044922	0.606652	yes	chr11	119284969	119285566	+	2	circRNA	ENST00000264033	CBL	chr11:119278713-119284968|chr11:119285566-119287851	Cbl proto-oncogene [Source:HGNC Symbol;Acc:HGNC:1541]
circRNA4325	0	25.8498	64.6514	13.959	15.7026	0	0	0	13.2404	0	0	0	3.18198	up	0.044974	0.606801	yes	chr10	27180953	27181581	+	2	circRNA	ENST00000375946	MASTL	chr10:27173259-27180952|chr10:27181581-27186378	microtubule associated serine/threonine kinase like [Source:HGNC Symbol;Acc:HGNC:19042]
circRNA13803	0	0	0	0	15.7026	13.3348	0	31.085	26.4807	73.6214	102.985	125.293	-3.62986	down	0.0451	0.607946	yes	chr2	71426460	71427414	+	1	circRNA	ENST00000264447	ZNF638	chr2:71424715-71426459|chr2:71427414-71428546	zinc finger protein 638 [Source:HGNC Symbol;Acc:HGNC:17894]
circRNA16538	0	0	0	0	0	0	15.4843	46.6274	13.2404	21.0347	17.1641	41.7645	-inf	down	0.045152	0.608093	yes	chr10	31461037	31502509	+	3	circRNA	ENST00000488625	ZEB1	chr10:31387266-31461036|chr10:31502509-31510672	zinc finger E-box binding homeobox 1 [Source:HGNC Symbol;Acc:HGNC:11642]
circRNA20379	0	0	0	0	0	0	0	77.7124	39.7211	10.5173	17.1641	27.843	-inf	down	0.045332	0.609756	yes	chr15	52584745	52593736	-	3	circRNA	ENST00000261844	FAM214A	chr15:52582307-52584744|chr15:52593736-52600126	family with sequence similarity 214 member A [Source:HGNC Symbol;Acc:HGNC:25609]
circRNA12776	0	0	0	0	15.7026	0	0	124.34	26.4807	63.104	51.4924	27.843	-4.2231	down	0.04539	0.609756	yes	chr11	123083085	123084713	-	3	circRNA	ENST00000448775	CLMP	chr11:123074843-123083084|chr11:123084713-123097794	CXADR like membrane protein [Source:HGNC Symbol;Acc:HGNC:24039]
circRNA12711	0	0	0	0	15.7026	0	0	62.1699	39.7211	52.5867	68.6565	41.7645	-4.07636	down	0.045399	0.609756	yes	chr11	33286413	33328633	+	2	circRNA	ENST00000525975	HIPK3	chr11:33256752-33286412|chr11:33328633-33337074	homeodomain interacting protein kinase 3 [Source:HGNC Symbol;Acc:HGNC:4915]
circRNA1888	41.6672	0	0	0	0	0	15.4843	62.1699	52.9614	31.552	154.477	55.686	-3.1596	down	0.045498	0.610531	yes	chr6	56179578	56182656	-	2	circRNA	ENST00000244728	COL21A1	chr6:56171128-56179577|chr6:56182656-56247386	collagen type XXI alpha 1 chain [Source:HGNC Symbol;Acc:HGNC:17025]
circRNA5687	0	103.399	38.7908	13.959	47.1079	0	0	15.5425	0	10.5173	17.1641	0	2.2334	up	0.045704	0.61274	yes	chr20	51712966	51729978	-	3	circRNA	ENST00000311637	ATP9A	chr20:51676208-51712965|chr20:51729978-51768301	ATPase phospholipid transporting 9A (putative) [Source:HGNC Symbol;Acc:HGNC:13540]
circRNA4073	0	38.7747	0	0	15.7026	0	0	170.967	39.7211	136.725	17.1641	125.293	-3.16867	down	0.046025	0.616485	yes	chr11	8435494	8464822	-	8	circRNA	ENST00000447869	STK33	chr11:8413692-8435493|chr11:8464822-8473162	serine/threonine kinase 33 [Source:HGNC Symbol;Acc:HGNC:14568]
circRNA9690	0	0	38.7908	0	0	0	0	108.797	92.6825	63.104	137.313	0	-3.37304	down	0.046111	0.617079	yes	chr5	139600372	139614966	+	4	circRNA	ENST00000511725	UBE2D2	chr5:139526612-139600371|chr5:139614966-139623367	ubiquitin conjugating enzyme E2 D2 [Source:HGNC Symbol;Acc:HGNC:12475]
circRNA21884	0	0	0	0	0	0	0	108.797	13.2404	21.0347	0	41.7645	-inf	down	0.046245	0.617808	yes	chr4	121833231	121835283	-	2	circRNA	ENST00000264499	BBS7	chr4:121828728-121833230|chr4:121835283-121839630	Bardet-Biedl syndrome 7 [Source:HGNC Symbol;Acc:HGNC:18758]
circRNA169	27.7781	258.498	38.7908	55.8361	141.324	40.0045	77.4216	575.072	278.048	220.864	480.596	375.88	-1.83644	down	0.046249	0.617808	yes	chr12	1027748	1028572	+	1	circRNA	ENST00000543086	ERC1	chr12:991322-1027747|chr12:1028572-1083163	ELKS/RAB6-interacting/CAST family member 1 [Source:HGNC Symbol;Acc:HGNC:17072]
circRNA9269	0	0	25.8605	0	62.8106	40.0045	61.9373	264.222	105.923	52.5867	308.954	27.843	-2.67446	down	0.046534	0.620655	yes	chr7	55982210	55983868	+	2	circRNA	ENST00000446692	NIPSNAP2	chr7:55981567-55982209|chr7:55983868-55984846	nipsnap homolog 2 [Source:HGNC Symbol;Acc:HGNC:4179]
circRNA2529	361.116	413.597	801.677	223.345	345.458	413.38	619.373	264.222	410.451	315.52	635.073	348.037	-0.0191034	down	0.046546	0.620655	no	chr3	149846011	149921227	+	7	circRNA	ENST00000392894	RNF13	chr3:149813353-149846010|chr3:149921227-149960055	ring finger protein 13 [Source:HGNC Symbol;Acc:HGNC:10057]
circRNA20914	0	0	0	0	0	0	0	31.085	0	31.552	102.985	27.843	-inf	down	0.046737	0.622641	yes	chr22	23095247	23096418	+	1	circRNA	ENST00000615612	GNAZ	chr22:23070570-23095246|chr22:23096418-23123086	G protein subunit alpha z [Source:HGNC Symbol;Acc:HGNC:4395]
circRNA645	27.7781	25.8498	0	0	47.1079	0	0	0	0	0	0	0	inf	up	0.046851	0.623599	yes	chr10	126970702	127110354	+	24	circRNA	ENST00000280333	DOCK1	chr10:126905563-126970701|chr10:127110354-127125473	dedicator of cytokinesis 1 [Source:HGNC Symbol;Acc:HGNC:2987]
circRNA3625	55.5563	323.123	193.954	97.7132	62.8106	106.679	216.781	512.902	635.537	399.659	789.55	292.351	-1.76115	down	0.046935	0.62373	yes	chr8	140846260	140890769	-	5	circRNA	ENST00000522684	PTK2	chr8:140830526-140846259|chr8:140890769-140925660	protein tyrosine kinase 2 [Source:HGNC Symbol;Acc:HGNC:9611]
circRNA2106	13.8891	103.399	103.442	27.9181	0	53.3393	123.875	341.935	145.644	168.277	188.805	236.665	-1.99671	down	0.046951	0.62373	yes	chr5	109713520	109716264	+	2	circRNA	ENST00000261483	MAN2A1	chr5:109690552-109713519|chr5:109716264-109729341	mannosidase alpha class 2A member 1 [Source:HGNC Symbol;Acc:HGNC:6824]
circRNA4715	0	25.8498	25.8605	0	47.1079	0	0	0	0	0	0	0	inf	up	0.047092	0.62373	yes	chr17	80287815	80291827	+	5	circRNA	ENST00000508628	RNF213	chr17:80278910-80287814|chr17:80291827-80294719	ring finger protein 213 [Source:HGNC Symbol;Acc:HGNC:14539]
circRNA26212	0	0	0	0	0	0	0	0	52.9614	31.552	85.8206	13.9215	-inf	down	0.047119	0.62373	yes	chr2	239139684	239176563	-	5	circRNA	ENST00000345617	HDAC4	chr2:239134643-239139683|chr2:239176563-239189832	histone deacetylase 4 [Source:HGNC Symbol;Acc:HGNC:14063]
circRNA26226	0	0	0	0	0	0	0	0	66.2018	52.5867	68.6565	0	-inf	down	0.047134	0.62373	yes	chr1	8508627	8557523	-	4	circRNA	ENST00000337907	RERE	chr1:8497529-8508626|chr1:8557523-8614560	arginine-glutamic acid dipeptide repeats [Source:HGNC Symbol;Acc:HGNC:9965]
circRNA17008	0	0	0	0	0	0	15.4843	62.1699	26.4807	21.0347	17.1641	13.9215	-inf	down	0.047171	0.62373	yes	chr14	21357197	21361213	-	7	circRNA	ENST00000216297	SUPT16H	chr14:21354540-21357196|chr14:21361213-21362196	SPT16 homolog, facilitates chromatin remodeling subunit [Source:HGNC Symbol;Acc:HGNC:11465]
circRNA5016	0	12.9249	0	0	0	0	15.4843	77.7124	13.2404	21.0347	171.641	13.9215	-4.5981	down	0.047176	0.62373	yes	chr15	65463761	65480399	-	6	circRNA	ENST00000341861	DPP8	chr15:65456371-65463760|chr15:65480399-65481514	dipeptidyl peptidase 8 [Source:HGNC Symbol;Acc:HGNC:16490]
circRNA18918	0	0	0	0	0	0	0	31.085	26.4807	21.0347	85.8206	13.9215	-inf	down	0.047198	0.62373	yes	chrX	32287529	32348528	-	6	circRNA	ENST00000619831	DMD	chrX:32217063-32287528|chrX:32348528-32362787	dystrophin [Source:HGNC Symbol;Acc:HGNC:2928]
circRNA20611	0	0	0	0	0	0	0	15.5425	0	21.0347	68.6565	83.5289	-inf	down	0.047303	0.624383	yes	chr14	79663778	79697937	+	3	circRNA	ENST00000634499	NRXN3	chr14:79467402-79663777|chr14:79697937-79805111	neurexin 3 [Source:HGNC Symbol;Acc:HGNC:8010]
circRNA21365	0	0	0	0	0	0	0	15.5425	26.4807	52.5867	34.3283	27.843	-inf	down	0.047342	0.624383	yes	chr6	18249651	18258405	-	5	circRNA	ENST00000397239	DEK	chr6:18237516-18249650|chr6:18258405-18263842	DEK proto-oncogene [Source:HGNC Symbol;Acc:HGNC:2768]
circRNA2903	111.113	0	77.5816	55.8361	62.8106	80.009	201.296	217.595	132.404	199.829	377.611	459.409	-2.03563	down	0.047374	0.624383	yes	chr2	230442937	230450255	+	6	circRNA	ENST00000264052	SP100	chr2:230417665-230442936|chr2:230450255-230461261	SP100 nuclear antigen [Source:HGNC Symbol;Acc:HGNC:11206]
circRNA19320	0	0	0	0	0	0	0	31.085	52.9614	31.552	0	41.7645	-inf	down	0.047499	0.625089	yes	chr12	107743197	107746424	-	3	circRNA	ENST00000228437	PRDM4	chr12:107742348-107743196|chr12:107746424-107751414	PR/SET domain 4 [Source:HGNC Symbol;Acc:HGNC:9348]
circRNA6169	0	25.8498	12.9303	55.8361	0	0	0	0	0	0	0	0	inf	up	0.047512	0.625089	yes	chr5	74634684	74636498	-	1	circRNA	ENST00000302351	ENC1	chr5:74629992-74634683|chr5:74636498-74640306	ectodermal-neural cortex 1 [Source:HGNC Symbol;Acc:HGNC:3345]
circRNA21283	0	0	0	0	0	0	0	31.085	0	10.5173	17.1641	139.215	-inf	down	0.047678	0.62658	yes	chr7	114628540	114631705	+	4	circRNA	ENST00000412402	FOXP2	chr7:114570881-114628539|chr7:114631705-114642409	forkhead box P2 [Source:HGNC Symbol;Acc:HGNC:13875]
circRNA22392	0	0	0	0	0	0	0	62.1699	13.2404	31.552	51.4924	13.9215	-inf	down	0.04771	0.62658	yes	chr2	46576087	46576656	+	2	circRNA	ENST00000238738	RHOQ	chr2:46543812-46576086|chr2:46576656-46580927	ras homolog family member Q [Source:HGNC Symbol;Acc:HGNC:17736]
circRNA17932	0	0	0	0	0	0	15.4843	62.1699	39.7211	10.5173	17.1641	13.9215	-inf	down	0.047753	0.626589	yes	chr4	168894579	168916027	+	5	circRNA	ENST00000261509	PALLD	chr4:168891057-168894578|chr4:168916027-168921533	palladin, cytoskeletal associated protein [Source:HGNC Symbol;Acc:HGNC:17068]
circRNA16853	0	0	0	0	0	0	30.9686	0	26.4807	21.0347	51.4924	27.843	-inf	down	0.047844	0.627068	yes	chr16	53255600	53263097	+	2	circRNA	ENST00000447540	CHD9	chr16:53254605-53255599|chr16:53263097-53267293	chromodomain helicase DNA binding protein 9 [Source:HGNC Symbol;Acc:HGNC:25701]
circRNA25932	0	0	0	0	0	0	0	0	105.923	42.0693	0	27.843	-inf	down	0.047923	0.627068	yes	chr2	8943187	8974435	-	2	circRNA	ENST00000462696	MBOAT2	chr2:8908716-8943186|chr2:8974435-9003539	membrane bound O-acyltransferase domain containing 2 [Source:HGNC Symbol;Acc:HGNC:25193]
circRNA21231	0	0	0	0	0	0	0	77.7124	13.2404	31.552	17.1641	27.843	-inf	down	0.047957	0.627068	yes	chr7	87163495	87174669	+	6	circRNA	ENST00000331242	DMTF1	chr7:87152555-87163494|chr7:87174669-87179544	cyclin D binding myb like transcription factor 1 [Source:HGNC Symbol;Acc:HGNC:14603]
circRNA406	27.7781	25.8498	0	13.959	62.8106	0	77.4216	108.797	145.644	189.312	85.8206	83.5289	-2.40478	down	0.047959	0.627068	yes	chr11	72984088	72989097	-	3	circRNA	ENST00000311172	FCHSD2	chr11:72921950-72984087|chr11:72989097-73000989	FCH and double SH3 domains 2 [Source:HGNC Symbol;Acc:HGNC:29114]
circRNA19682	0	0	0	0	0	0	0	31.085	26.4807	0	51.4924	69.6074	-inf	down	0.048278	0.630682	yes	chr10	29550597	29563292	-	4	circRNA	ENST00000375400	SVIL	chr10:29531288-29550596|chr10:29563292-29569254	supervillin [Source:HGNC Symbol;Acc:HGNC:11480]
circRNA23091	0	0	0	0	0	0	0	62.1699	52.9614	0	17.1641	41.7645	-inf	down	0.048414	0.631901	yes	chr1	225530554	225567414	-	3	circRNA	ENST00000366844	ENAH	chr1:225519565-225530553|chr1:225567414-225652685	ENAH, actin regulator [Source:HGNC Symbol;Acc:HGNC:18271]
circRNA17671	0	0	0	0	0	0	46.453	0	26.4807	21.0347	85.8206	0	-inf	down	0.048458	0.631918	yes	chr5	37153740	37167213	-	7	circRNA	ENST00000508244	C5orf42	chr5:37148268-37153739|chr5:37167213-37168790	chromosome 5 open reading frame 42 [Source:HGNC Symbol;Acc:HGNC:25801]
circRNA27178	0	0	0	0	0	0	0	0	0	63.104	51.4924	69.6074	-inf	down	0.048512	0.632065	yes	chr11	34089395	34092056	+	4	circRNA	ENST00000341394	CAPRIN1	chr11:34086413-34089394|chr11:34092056-34096478	cell cycle associated protein 1 [Source:HGNC Symbol;Acc:HGNC:6743]
circRNA19848	0	0	0	0	0	0	0	31.085	66.2018	21.0347	0	41.7645	-inf	down	0.04857	0.632264	yes	chr10	110881233	110887886	+	4	circRNA	ENST00000393104	PDCD4	chr10:110876753-110881232|chr10:110887886-110889532	programmed cell death 4 [Source:HGNC Symbol;Acc:HGNC:8763]
circRNA6270	0	90.4743	38.7908	13.959	0	26.6697	0	0	0	0	68.6565	0	1.30717	up	0.048664	0.632931	yes	chr5	141582312	141583615	-	3	circRNA	ENST00000389054	DIAPH1	chr5:141580883-141582311|chr5:141583615-141584123	diaphanous related formin 1 [Source:HGNC Symbol;Acc:HGNC:2876]
circRNA18352	0	0	0	0	0	0	30.9686	15.5425	26.4807	42.0693	0	27.843	-inf	down	0.048716	0.633051	yes	chr2	203193795	203211106	+	8	circRNA	ENST00000449802	NBEAL1	chr2:203190389-203193794|chr2:203211106-203213517	neurobeachin like 1 [Source:HGNC Symbol;Acc:HGNC:20681]
circRNA4778	0	12.9249	0	0	0	40.0045	15.4843	124.34	13.2404	21.0347	102.985	167.058	-3.06888	down	0.048777	0.633288	yes	chr16	16111375	16111582	+	1	circRNA	ENST00000399410	ABCC1	chr16:16106873-16111374|chr16:16111582-16114765	ATP binding cassette subfamily C member 1 [Source:HGNC Symbol;Acc:HGNC:51]
circRNA16216	0	0	0	0	0	0	15.4843	108.797	13.2404	0	17.1641	27.843	-inf	down	0.048827	0.633382	yes	chr12	2566422	2567794	+	2	circRNA	ENST00000335762	CACNA1C	chr12:2556977-2566421|chr12:2567794-2581589	calcium voltage-gated channel subunit alpha1 C [Source:HGNC Symbol;Acc:HGNC:1390]
circRNA18128	0	0	0	0	0	0	15.4843	0	66.2018	42.0693	17.1641	13.9215	-inf	down	0.04894	0.634292	yes	chr3	197814908	197817302	+	2	circRNA	ENST00000438796	LRCH3	chr3:197791540-197814907|chr3:197817302-197820324	leucine rich repeats and calponin homology domain containing 3 [Source:HGNC Symbol;Acc:HGNC:28637]
circRNA17899	0	0	0	0	0	0	30.9686	46.6274	0	10.5173	51.4924	27.843	-inf	down	0.049011	0.634656	yes	chr4	120754553	120821345	-	11	circRNA	ENST00000264808	PRDM5	chr4:120710413-120754552|chr4:120821345-120853417	PR/SET domain 5 [Source:HGNC Symbol;Acc:HGNC:9349]
circRNA17506	0	0	0	0	0	0	30.9686	31.085	39.7211	31.552	17.1641	0	-inf	down	0.049165	0.636094	yes	chr6	30670410	30671274	-	3	circRNA	ENST00000376442	DHX16	chr6:30665733-30670409|chr6:30671274-30672634	DEAH-box helicase 16 [Source:HGNC Symbol;Acc:HGNC:2739]
circRNA3598	41.6672	90.4743	77.5816	0	15.7026	0	0	0	13.2404	0	68.6565	0	1.46077	up	0.04921	0.63612	yes	chr8	123333878	123337821	-	4	circRNA	ENST00000517666	ATAD2	chr8:123326026-123333877|chr8:123337821-123339310	ATPase family, AAA domain containing 2 [Source:HGNC Symbol;Acc:HGNC:30123]
circRNA9062	0	0	77.5816	27.9181	0	0	0	0	0	0	0	0	inf	up	0.049514	0.639491	yes	chr18	49929512	49954435	-	5	circRNA	ENST00000285039	MYO5B	chr18:49912173-49929511|chr18:49954435-49962265	myosin VB [Source:HGNC Symbol;Acc:HGNC:7603]
circRNA4607	0	12.9249	25.8605	0	15.7026	0	30.9686	77.7124	92.6825	105.173	51.4924	69.6074	-2.97237	down	0.049749	0.641966	yes	chr17	46066537	46094701	-	4	circRNA	ENST00000432791	KANSL1	chr17:46050704-46066536|chr17:46094701-46170854	KAT8 regulatory NSL complex subunit 1 [Source:HGNC Symbol;Acc:HGNC:24565]
circRNA4845	0	12.9249	0	0	0	0	92.9059	31.085	52.9614	42.0693	0	27.843	-4.25549	down	0.049916	0.64356	yes	chr16	67685457	67685802	-	1	circRNA	ENST00000268797	GFOD2	chr16:67676053-67685456|chr16:67685802-67719162	glucose-fructose oxidoreductase domain containing 2 [Source:HGNC Symbol;Acc:HGNC:28159]
circRNA19786	0	0	0	0	0	0	0	15.5425	79.4422	52.5867	0	13.9215	-inf	down	0.049991	0.643966	yes	chr10	88938061	88943907	-	5	circRNA	ENST00000224784	ACTA2	chr10:88935366-88938060|chr10:88943907-88947257	actin, alpha 2, smooth muscle, aorta [Source:HGNC Symbol;Acc:HGNC:130]
circRNA566	13.8891	51.6996	12.9303	0	15.7026	0	77.4216	170.967	66.2018	31.552	274.626	27.843	-2.78323	down	0.050078	0.644526	no	chr10	63610187	63619800	+	2	circRNA	ENST00000373758	REEP3	chr10:63599283-63610186|chr10:63619800-63620812	receptor accessory protein 3 [Source:HGNC Symbol;Acc:HGNC:23711]
circRNA17765	0	0	0	0	0	0	61.9373	15.5425	13.2404	21.0347	51.4924	0	-inf	down	0.050277	0.646323	no	chr5	137942875	137949184	-	5	circRNA	ENST00000033079	FAM13B	chr5:137942045-137942874|chr5:137949184-137952627	family with sequence similarity 13 member B [Source:HGNC Symbol;Acc:HGNC:1335]
circRNA1419	13.8891	12.9249	0	0	0	13.3348	30.9686	77.7124	26.4807	105.173	85.8206	69.6074	-3.30121	down	0.050305	0.646323	no	chr22	40881770	40882177	+	1	circRNA	ENST00000357137	XPNPEP3	chr22:40869115-40881769|chr22:40882177-40886312	X-prolyl aminopeptidase 3 [Source:HGNC Symbol;Acc:HGNC:28052]
circRNA14747	0	0	0	0	0	13.3348	30.9686	77.7124	26.4807	94.656	0	27.843	-4.2722	down	0.050387	0.646815	no	chr16	28487456	28489386	-	4	circRNA	ENST00000635887	AC138894.1	chr16:28486650-28487455|chr16:28489386-28491481	NA
circRNA5725	0	38.7747	0	0	15.7026	0	46.453	155.425	92.6825	31.552	0	125.293	-3.0507	down	0.050442	0.64696	no	chr7	854920	857957	+	3	circRNA	ENST00000389574	SUN1	chr7:853618-854919|chr7:857957-860127	Sad1 and UNC84 domain containing 1 [Source:HGNC Symbol;Acc:HGNC:18587]
circRNA22337	0	0	0	0	0	0	0	15.5425	13.2404	52.5867	51.4924	27.843	-inf	down	0.050575	0.648104	no	chr2	29133655	29157347	+	7	circRNA	ENST00000401605	CLIP4	chr2:29132245-29133654|chr2:29157347-29160332	CAP-Gly domain containing linker protein family member 4 [Source:HGNC Symbol;Acc:HGNC:26108]
circRNA1142	27.7781	64.6245	12.9303	13.959	15.7026	13.3348	61.9373	248.68	79.4422	94.656	171.641	153.136	-2.44821	down	0.051055	0.653689	no	chr14	31127785	31133675	-	4	circRNA	ENST00000611816	HECTD1	chr14:31123047-31127784|chr14:31133675-31134871	HECT domain E3 ubiquitin protein ligase 1 [Source:HGNC Symbol;Acc:HGNC:20157]
circRNA819	55.5563	129.249	77.5816	13.959	31.4053	53.3393	0	31.085	13.2404	52.5867	17.1641	83.5289	0.869741	up	0.051195	0.654915	no	chr16	304304	314683	-	3	circRNA	ENST00000461023	AXIN1	chr16:298251-304303|chr16:314683-346147	axin 1 [Source:HGNC Symbol;Acc:HGNC:903]
circRNA3050	83.3344	0	64.6514	0	15.7026	80.009	61.9373	77.7124	278.048	147.243	377.611	153.136	-2.16867	down	0.051309	0.655209	no	chr1	48355670	48359770	-	2	circRNA	ENST00000371847	SPATA6	chr1:48305878-48355669|chr1:48359770-48385308	spermatogenesis associated 6 [Source:HGNC Symbol;Acc:HGNC:18309]
circRNA19632	0	0	0	0	0	0	0	77.7124	0	42.0693	0	55.686	-inf	down	0.051348	0.655209	no	chr10	413913	423033	-	4	circRNA	ENST00000381496	DIP2C	chr10:409017-413912|chr10:423033-440870	disco interacting protein 2 homolog C [Source:HGNC Symbol;Acc:HGNC:29150]
circRNA6933	0	25.8498	25.8605	0	0	40.0045	0	0	0	0	0	0	inf	up	0.05139	0.655209	no	chr2	69345904	69363670	-	9	circRNA	ENST00000357308	GFPT1	chr2:69342249-69345903|chr2:69363670-69370000	glutamine--fructose-6-phosphate transaminase 1 [Source:HGNC Symbol;Acc:HGNC:4241]
circRNA20157	0	0	0	0	0	0	0	15.5425	0	10.5173	68.6565	97.4504	-inf	down	0.051395	0.655209	no	chr16	15738565	15740188	-	2	circRNA	ENST00000396324	MYH11	chr16:15737620-15738564|chr16:15740188-15741462	myosin heavy chain 11 [Source:HGNC Symbol;Acc:HGNC:7569]
circRNA29536	0	0	0	0	0	0	0	0	0	31.552	171.641	27.843	-inf	down	0.051606	0.657271	no	chr9	14851284	14851607	-	1	circRNA	ENST00000422223	FREM1	chr9:14848773-14851283|chr9:14851607-14857552	FRAS1 related extracellular matrix 1 [Source:HGNC Symbol;Acc:HGNC:23399]
circRNA3168	27.7781	90.4743	0	55.8361	62.8106	66.6741	139.359	248.68	317.769	199.829	257.462	139.215	-2.10096	down	0.051673	0.657271	no	chr1	151315573	151316509	-	1	circRNA	ENST00000368874	PI4KB	chr1:151307801-151315572|chr1:151316509-151327270	phosphatidylinositol 4-kinase beta [Source:HGNC Symbol;Acc:HGNC:8984]
circRNA749	111.113	12.9249	12.9303	13.959	31.4053	66.6741	108.39	248.68	119.163	199.829	240.298	139.215	-2.08378	down	0.05169	0.657271	no	chr17	49311312	49312042	-	2	circRNA	ENST00000508237	ZNF652	chr17:49298924-49311311|chr17:49312042-49312697	zinc finger protein 652 [Source:HGNC Symbol;Acc:HGNC:29147]
circRNA19252	0	0	0	0	0	0	0	62.1699	39.7211	21.0347	51.4924	0	-inf	down	0.051883	0.658797	no	chr12	63617304	63647365	-	7	circRNA	ENST00000324472	DPY19L2	chr12:63608675-63617303|chr12:63647365-63661343	dpy-19 like 2 [Source:HGNC Symbol;Acc:HGNC:19414]
circRNA5277	0	12.9249	12.9303	0	0	13.3348	0	46.6274	105.923	94.656	120.149	55.686	-3.43224	down	0.051899	0.658797	no	chr19	3623688	3624162	-	1	circRNA	ENST00000429344	CACTIN	chr19:3620802-3623687|chr19:3624162-3626595	cactin, spliceosome C complex subunit [Source:HGNC Symbol;Acc:HGNC:29938]
circRNA20121	0	0	0	0	0	0	0	46.6274	26.4807	10.5173	0	83.5289	-inf	down	0.052052	0.659385	no	chr16	3504720	3506415	+	2	circRNA	ENST00000576634	CLUAP1	chr16:3501089-3504719|chr16:3506415-3508288	clusterin associated protein 1 [Source:HGNC Symbol;Acc:HGNC:19009]
circRNA19301	0	0	0	0	0	0	0	77.7124	13.2404	10.5173	68.6565	13.9215	-inf	down	0.052056	0.659385	no	chr12	98773042	98801125	-	5	circRNA	ENST00000341752	ANKS1B	chr12:98751522-98773041|chr12:98801125-98829173	ankyrin repeat and sterile alpha motif domain containing 1B [Source:HGNC Symbol;Acc:HGNC:24600]
circRNA20930	0	0	0	0	0	0	0	62.1699	39.7211	31.552	34.3283	0	-inf	down	0.052079	0.659385	no	chr22	29636751	29642285	+	3	circRNA	ENST00000413209	NF2	chr22:29604112-29636750|chr22:29642285-29694751	neurofibromin 2 [Source:HGNC Symbol;Acc:HGNC:7773]
circRNA22153	0	0	0	0	0	0	0	46.6274	13.2404	42.0693	0	55.686	-inf	down	0.052286	0.66144	no	chr3	123347782	123352581	-	2	circRNA	ENST00000462833	ADCY5	chr3:123332675-123347781|chr3:123352581-123447411	adenylate cyclase 5 [Source:HGNC Symbol;Acc:HGNC:236]
circRNA2535	152.78	142.174	374.978	41.8771	94.2159	226.692	139.359	932.549	741.46	525.867	858.206	375.88	-1.79082	down	0.052407	0.662269	no	chr3	158122103	158123991	+	2	circRNA	ENST00000480820	RSRC1	chr3:158106010-158122102|chr3:158123991-158203071	arginine and serine rich coiled-coil 1 [Source:HGNC Symbol;Acc:HGNC:24152]
circRNA3928	0	12.9249	0	0	0	0	0	62.1699	26.4807	52.5867	34.3283	69.6074	-4.24557	down	0.052441	0.662269	no	chr12	66529831	66541950	-	3	circRNA	ENST00000398016	GRIP1	chr12:66517976-66529830|chr12:66541950-66596846	glutamate receptor interacting protein 1 [Source:HGNC Symbol;Acc:HGNC:18708]
circRNA15113	0	0	0	0	0	53.3393	185.812	0	0	0	120.149	180.979	-3.19047	down	0.052718	0.663832	no	chr7	22976210	22991139	-	6	circRNA	ENST00000432176	FAM126A	chr7:22964531-22976209|chr7:22991139-23013924	family with sequence similarity 126 member A [Source:HGNC Symbol;Acc:HGNC:24587]
circRNA19888	0	0	0	0	0	0	0	46.6274	66.2018	21.0347	34.3283	0	-inf	down	0.052755	0.663832	no	chr10	130166507	130171636	+	4	circRNA	ENST00000331244	GLRX3	chr10:130160997-130166506|chr10:130171636-130174866	glutaredoxin 3 [Source:HGNC Symbol;Acc:HGNC:15987]
circRNA22601	0	0	0	0	0	0	0	46.6274	26.4807	21.0347	34.3283	27.843	-inf	down	0.052784	0.663832	no	chr2	205158722	205185863	+	4	circRNA	ENST00000406610	PARD3B	chr2:205125737-205158721|chr2:205185863-205193204	par-3 family cell polarity regulator beta [Source:HGNC Symbol;Acc:HGNC:14446]
circRNA4854	0	25.8498	0	0	15.7026	53.3393	0	0	0	0	0	0	inf	up	0.052787	0.663832	no	chr16	68274691	68275249	+	1	circRNA	ENST00000618043	SLC7A6	chr16:68266721-68274690|chr16:68275249-68287745	solute carrier family 7 member 6 [Source:HGNC Symbol;Acc:HGNC:11064]
circRNA18021	0	0	0	0	0	0	15.4843	15.5425	39.7211	0	17.1641	69.6074	-inf	down	0.052789	0.663832	no	chr3	71000972	71053773	-	6	circRNA	ENST00000318789	FOXP1	chr3:70988077-71000971|chr3:71053773-71112535	forkhead box P1 [Source:HGNC Symbol;Acc:HGNC:3823]
circRNA1397	41.6672	12.9249	0	27.9181	0	0	185.812	46.6274	132.404	63.104	0	111.372	-2.70849	down	0.052872	0.664311	no	chr22	24302195	24313466	+	2	circRNA	ENST00000437398	SPECC1L	chr22:24270983-24302194|chr22:24313466-24321287	sperm antigen with calponin homology and coiled-coil domains 1 like [Source:HGNC Symbol;Acc:HGNC:29022]
circRNA1208	13.8891	90.4743	0	69.7952	31.4053	0	77.4216	310.85	211.846	105.173	223.134	27.843	-2.21783	down	0.052934	0.664526	no	chr14	75046376	75049718	-	1	circRNA	ENST00000355774	MLH3	chr14:75042477-75046375|chr14:75049718-75051379	mutL homolog 3 [Source:HGNC Symbol;Acc:HGNC:7128]
circRNA485	13.8891	38.7747	51.7211	41.8771	94.2159	53.3393	61.9373	404.104	264.807	157.76	240.298	208.822	-2.1868	down	0.05308	0.665431	no	chr11	121045674	121060085	+	6	circRNA	ENST00000529397	TBCEL	chr11:121024154-121045673|chr11:121060085-121086777	tubulin folding cofactor E like [Source:HGNC Symbol;Acc:HGNC:28115]
circRNA2231	83.3344	25.8498	51.7211	0	15.7026	13.3348	77.4216	155.425	105.923	126.208	257.462	180.979	-2.24983	down	0.053096	0.665431	no	chr4	39737420	39777810	+	5	circRNA	ENST00000261427	UBE2K	chr4:39698390-39737419|chr4:39777810-39778359	ubiquitin conjugating enzyme E2 K [Source:HGNC Symbol;Acc:HGNC:4914]
circRNA21936	0	0	0	0	0	0	0	31.085	13.2404	31.552	120.149	0	-inf	down	0.053225	0.666483	no	chr4	154366210	154377444	-	3	circRNA	ENST00000357232	DCHS2	chr4:154357324-154366209|chr4:154377444-154384367	dachsous cadherin-related 2 [Source:HGNC Symbol;Acc:HGNC:23111]
circRNA1378	69.4453	25.8498	0	83.7542	94.2159	66.6741	170.328	124.34	278.048	252.416	326.118	208.822	-2.00033	down	0.053365	0.667499	no	chr18	56756583	56758953	+	2	circRNA	ENST00000357574	WDR7	chr18:56731597-56756582|chr18:56758953-56779430	WD repeat domain 7 [Source:HGNC Symbol;Acc:HGNC:13490]
circRNA19668	0	0	0	0	0	0	0	46.6274	0	31.552	68.6565	27.843	-inf	down	0.053472	0.667499	no	chr10	21904522	21929141	-	6	circRNA	ENST00000376980	DNAJC1	chr10:21882439-21904521|chr10:21929141-22003212	DnaJ heat shock protein family (Hsp40) member C1 [Source:HGNC Symbol;Acc:HGNC:20090]
circRNA1958	388.894	129.249	193.954	237.304	251.242	200.022	572.92	917.006	489.893	662.592	909.699	849.211	-1.65182	down	0.053493	0.667499	no	chr6	138943513	138944622	-	3	circRNA	ENST00000450536	REPS1	chr6:138941489-138943512|chr6:138944622-138945218	RALBP1 associated Eps domain containing 1 [Source:HGNC Symbol;Acc:HGNC:15578]
circRNA19684	0	0	0	0	0	0	0	46.6274	26.4807	31.552	68.6565	0	-inf	down	0.053533	0.667499	no	chr10	31373018	31387798	+	3	circRNA	ENST00000561304	ZEB1	chr10:31319133-31373017|chr10:31387798-31461036	zinc finger E-box binding homeobox 1 [Source:HGNC Symbol;Acc:HGNC:11642]
circRNA19036	0	0	0	0	0	0	0	46.6274	0	84.1387	51.4924	0	-inf	down	0.05354	0.667499	no	chr13	35040933	35058863	+	7	circRNA	ENST00000400445	NBEA	chr13:34943114-35040932|chr13:35058863-35069907	neurobeachin [Source:HGNC Symbol;Acc:HGNC:7648]
circRNA1500	13.8891	116.324	0	0	47.1079	0	0	0	0	10.5173	0	0	4.07552	up	0.053689	0.667499	no	chr20	56381433	56384324	-	3	circRNA	ENST00000395914	AURKA	chr20:56373556-56381432|chr20:56384324-56386256	aurora kinase A [Source:HGNC Symbol;Acc:HGNC:11393]
circRNA18224	0	0	0	0	0	0	15.4843	31.085	39.7211	42.0693	0	13.9215	-inf	down	0.053694	0.667499	no	chr2	63404048	63439871	-	4	circRNA	ENST00000272321	WDPCP	chr2:63382094-63404047|chr2:63439871-63484603	WD repeat containing planar cell polarity effector [Source:HGNC Symbol;Acc:HGNC:28027]
circRNA15507	0	0	0	0	0	26.6697	46.453	0	0	136.725	120.149	55.686	-3.75077	down	0.053695	0.667499	no	chr3	50252100	50253184	+	3	circRNA	ENST00000422163	GNAI2	chr3:50227193-50252099|chr3:50253184-50256191	G protein subunit alpha i2 [Source:HGNC Symbol;Acc:HGNC:4385]
circRNA8567	0	0	12.9303	0	0	13.3348	30.9686	93.2549	26.4807	21.0347	120.149	55.686	-3.7261	down	0.053712	0.667499	no	chr17	60623521	60633977	+	2	circRNA	ENST00000629650	PPM1D	chr17:60600886-60623520|chr17:60633977-60647891	protein phosphatase, Mg2+/Mn2+ dependent 1D [Source:HGNC Symbol;Acc:HGNC:9277]
circRNA3854	0	12.9249	12.9303	0	0	0	46.453	77.7124	39.7211	21.0347	154.477	13.9215	-3.77245	down	0.053847	0.667935	no	chr12	19473248	19500221	+	3	circRNA	ENST00000541908	AEBP2	chr12:19462717-19473247|chr12:19500221-19512397	AE binding protein 2 [Source:HGNC Symbol;Acc:HGNC:24051]
circRNA11096	0	0	0	55.8361	0	0	0	77.7124	52.9614	52.5867	188.805	41.7645	-2.88977	down	0.053894	0.667935	no	chr11	62535945	62536567	-	2	circRNA	ENST00000257247	AHNAK	chr11:62535190-62535944|chr11:62536567-62546659	AHNAK nucleoprotein [Source:HGNC Symbol;Acc:HGNC:347]
circRNA18179	0	0	0	0	0	0	30.9686	31.085	13.2404	10.5173	34.3283	27.843	-inf	down	0.053896	0.667935	no	chr2	40160765	40164984	-	2	circRNA	ENST00000406785	SLC8A1	chr2:40139676-40160764|chr2:40164984-40174824	solute carrier family 8 member A1 [Source:HGNC Symbol;Acc:HGNC:11068]
circRNA26293	0	0	0	0	0	0	0	0	26.4807	73.6214	51.4924	13.9215	-inf	down	0.053946	0.667935	no	chr1	43588731	43589000	+	1	circRNA	ENST00000359947	PTPRF	chr1:43578920-43588730|chr1:43589000-43590971	protein tyrosine phosphatase, receptor type F [Source:HGNC Symbol;Acc:HGNC:9670]
circRNA17038	0	0	0	0	0	0	15.4843	0	26.4807	10.5173	51.4924	55.686	-inf	down	0.054013	0.667935	no	chr14	54702062	54751537	+	4	circRNA	ENST00000554335	SAMD4A	chr14:54568112-54702061|chr14:54751537-54760160	sterile alpha motif domain containing 4A [Source:HGNC Symbol;Acc:HGNC:23023]
circRNA18928	0	0	0	0	0	0	0	31.085	79.4422	0	85.8206	0	-inf	down	0.054044	0.667935	no	chrX	32697870	32699293	-	2	circRNA	ENST00000619831	DMD	chrX:32645152-32697869|chrX:32699293-32809492	dystrophin [Source:HGNC Symbol;Acc:HGNC:2928]
circRNA4094	0	25.8498	0	27.9181	0	0	123.875	108.797	52.9614	10.5173	85.8206	69.6074	-3.07016	down	0.054063	0.667935	no	chr11	17131916	17145942	-	6	circRNA	ENST00000265970	PIK3C2A	chr11:17129467-17131915|chr11:17145942-17147516	phosphatidylinositol-4-phosphate 3-kinase catalytic subunit type 2 alpha [Source:HGNC Symbol;Acc:HGNC:8971]
circRNA1048	13.8891	0	0	0	0	0	15.4843	46.6274	0	126.208	34.3283	55.686	-4.3248	down	0.054137	0.668292	no	chr15	65752379	65761438	-	3	circRNA	ENST00000443035	DENND4A	chr15:65741784-65752378|chr15:65761438-65792009	DENN domain containing 4A [Source:HGNC Symbol;Acc:HGNC:24321]
circRNA16811	0	0	0	0	0	0	30.9686	31.085	13.2404	21.0347	17.1641	27.843	-inf	down	0.054184	0.668314	no	chr16	11779166	11782388	-	3	circRNA	ENST00000355758	ZC3H7A	chr16:11776909-11779165|chr16:11782388-11797123	zinc finger CCCH-type containing 7A [Source:HGNC Symbol;Acc:HGNC:30959]
circRNA293	13.8891	0	0	0	0	13.3348	30.9686	46.6274	66.2018	63.104	85.8206	27.843	-3.55767	down	0.054327	0.66952	no	chr12	110485078	110487943	+	4	circRNA	ENST00000377673	FAM216A	chr12:110473118-110485077|chr12:110487943-110490018	family with sequence similarity 216 member A [Source:HGNC Symbol;Acc:HGNC:30180]
circRNA16639	0	0	0	0	0	0	46.453	15.5425	0	21.0347	102.985	0	-inf	down	0.054395	0.669801	no	chr10	127008732	127012374	+	2	circRNA	ENST00000280333	DOCK1	chr10:127000307-127008731|chr10:127012374-127018709	dedicator of cytokinesis 1 [Source:HGNC Symbol;Acc:HGNC:2987]
circRNA22654	0	0	0	0	0	0	0	62.1699	0	42.0693	34.3283	27.843	-inf	down	0.054462	0.669991	no	chr2	232564247	232567214	+	3	circRNA	ENST00000258416	EIF4E2	chr2:232558018-232564246|chr2:232567214-232568944	eukaryotic translation initiation factor 4E family member 2 [Source:HGNC Symbol;Acc:HGNC:3293]
circRNA7128	0	38.7747	0	0	0	0	46.453	46.6274	66.2018	73.6214	34.3283	27.843	-2.92789	down	0.054501	0.669991	no	chr2	218582971	218584721	+	2	circRNA	ENST00000627282	CNOT9	chr2:218580740-218582970|chr2:218584721-218587304	CCR4-NOT transcription complex subunit 9 [Source:HGNC Symbol;Acc:HGNC:10445]
circRNA382	13.8891	64.6245	12.9303	97.7132	125.621	120.013	170.328	264.222	278.048	283.968	360.447	208.822	-1.84854	down	0.054564	0.670209	no	chr11	61437625	61438113	+	2	circRNA	ENST00000544025	AP003108.2	chr11:61429350-61437624|chr11:61438113-61481781	NA
circRNA7523	0	12.9249	12.9303	27.9181	0	26.6697	0	0	0	0	0	0	inf	up	0.054802	0.672331	no	chr1	233346442	233355011	+	3	circRNA	ENST00000366623	MAP3K21	chr1:233328833-233346441|chr1:233355011-233362052	mitogen-activated protein kinase kinase kinase 21 [Source:HGNC Symbol;Acc:HGNC:29798]
circRNA28729	0	0	0	0	0	0	0	0	0	63.104	188.805	0	-inf	down	0.054846	0.672331	no	chr4	119538960	119607297	-	10	circRNA	ENST00000354960	PDE5A	chr4:119525695-119538959|chr4:119607297-119628519	phosphodiesterase 5A [Source:HGNC Symbol;Acc:HGNC:8784]
circRNA4064	0	25.8498	0	0	0	0	46.453	93.2549	13.2404	52.5867	34.3283	27.843	-3.37242	down	0.054873	0.672331	no	chr11	2969803	2972243	-	3	circRNA	ENST00000620138	NAP1L4	chr11:2964751-2969802|chr11:2972243-2976023	nucleosome assembly protein 1 like 4 [Source:HGNC Symbol;Acc:HGNC:7640]
circRNA19597	0	0	0	0	0	0	0	46.6274	13.2404	21.0347	34.3283	41.7645	-inf	down	0.054993	0.673244	no	chr11	113852501	113854335	-	2	circRNA	ENST00000003302	USP28	chr11:113841768-113852500|chr11:113854335-113875444	ubiquitin specific peptidase 28 [Source:HGNC Symbol;Acc:HGNC:12625]
circRNA22651	0	0	0	0	0	0	0	62.1699	13.2404	0	0	111.372	-inf	down	0.05511	0.674118	no	chr2	231288660	231291443	+	2	circRNA	ENST00000428662	ARMC9	chr2:231282133-231288659|chr2:231291443-231296197	armadillo repeat containing 9 [Source:HGNC Symbol;Acc:HGNC:20730]
circRNA20210	0	0	0	0	0	0	0	31.085	0	52.5867	34.3283	41.7645	-inf	down	0.055347	0.676429	no	chr16	28488591	28489386	-	2	circRNA	ENST00000635887	AC138894.1	chr16:28487741-28488590|chr16:28489386-28491481	NA
circRNA17419	0	0	0	0	0	0	61.9373	0	39.7211	52.5867	0	0	-inf	down	0.055428	0.676429	no	chr7	90726567	90790652	+	3	circRNA	ENST00000380050	CDK14	chr7:90604249-90726566|chr7:90790652-90863174	cyclin dependent kinase 14 [Source:HGNC Symbol;Acc:HGNC:8883]
circRNA20363	0	0	0	0	0	0	0	62.1699	26.4807	10.5173	34.3283	27.843	-inf	down	0.055436	0.676429	no	chr15	45175219	45178306	-	2	circRNA	ENST00000560540	SHF	chr15:45172318-45175218|chr15:45178306-45187453	Src homology 2 domain containing F [Source:HGNC Symbol;Acc:HGNC:25116]
circRNA12289	0	0	0	27.9181	0	0	46.453	93.2549	105.923	0	51.4924	41.7645	-3.60154	down	0.055754	0.679749	no	chr1	51405905	51408332	-	2	circRNA	ENST00000371733	EPS15	chr1:51403532-51405904|chr1:51408332-51409534	epidermal growth factor receptor pathway substrate 15 [Source:HGNC Symbol;Acc:HGNC:3419]
circRNA92	13.8891	25.8498	0	13.959	15.7026	53.3393	0	31.085	0	0	0	0	1.98132	up	0.055958	0.681674	no	chr13	40559509	40560860	-	1	circRNA	ENST00000636651	FOXO1	chr13:40474095-40559508|chr13:40560860-40611020	forkhead box O1 [Source:HGNC Symbol;Acc:HGNC:3819]
circRNA14262	0	0	0	0	0	13.3348	0	31.085	13.2404	52.5867	120.149	55.686	-4.35429	down	0.056119	0.683073	no	chrX	155506898	155524632	-	4	circRNA	ENST00000334398	TMLHE	chrX:155492495-155506897|chrX:155524632-155545095	trimethyllysine hydroxylase, epsilon [Source:HGNC Symbol;Acc:HGNC:18308]
circRNA3816	0	64.6245	0	0	47.1079	0	0	0	0	0	0	0	inf	up	0.05622	0.683741	no	chr13	102618722	102638315	+	11	circRNA	ENST00000376065	TPP2	chr13:102616500-102618721|chr13:102638315-102640269	tripeptidyl peptidase 2 [Source:HGNC Symbol;Acc:HGNC:12016]
circRNA23722	0	0	0	0	0	0	0	0	26.4807	31.552	85.8206	27.843	-inf	down	0.056427	0.685695	no	chr12	26681874	26716242	-	8	circRNA	ENST00000381340	ITPR2	chr12:26666051-26681873|chr12:26716242-26722396	inositol 1,4,5-trisphosphate receptor type 2 [Source:HGNC Symbol;Acc:HGNC:6181]
circRNA137	166.669	25.8498	38.7908	41.8771	62.8106	40.0045	92.9059	15.5425	39.7211	0	17.1641	69.6074	0.67844	up	0.056583	0.68634	no	chr13	95832927	95837202	-	2	circRNA	ENST00000376747	UGGT2	chr13:95801812-95832926|chr13:95837202-95853542	UDP-glucose glycoprotein glucosyltransferase 2 [Source:HGNC Symbol;Acc:HGNC:15664]
circRNA22	13.8891	0	0	0	0	0	0	77.7124	39.7211	105.173	85.8206	0	-4.47291	down	0.056661	0.68634	no	chrX	32518008	32573846	-	5	circRNA	ENST00000619831	DMD	chrX:32501842-32518007|chrX:32573846-32595756	dystrophin [Source:HGNC Symbol;Acc:HGNC:2928]
circRNA2033	27.7781	38.7747	51.7211	0	15.7026	26.6697	61.9373	217.595	145.644	136.725	240.298	69.6074	-2.44012	down	0.056666	0.68634	no	chr5	43161249	43161931	+	2	circRNA	ENST00000510026	ZNF131	chr5:43139309-43161248|chr5:43161931-43173317	zinc finger protein 131 [Source:HGNC Symbol;Acc:HGNC:12915]
circRNA6540	0	38.7747	64.6514	0	62.8106	13.3348	0	15.5425	0	21.0347	0	0	2.29554	up	0.056698	0.68634	no	chr4	177353308	177360677	+	2	circRNA	ENST00000264596	NEIL3	chr4:177351549-177353307|chr4:177360677-177362288	nei like DNA glycosylase 3 [Source:HGNC Symbol;Acc:HGNC:24573]
circRNA21588	0	0	0	0	0	0	0	46.6274	79.4422	10.5173	34.3283	0	-inf	down	0.056712	0.68634	no	chr5	55467869	55475450	-	2	circRNA	ENST00000307259	PLPP1	chr5:55441908-55467868|chr5:55475450-55534571	phospholipid phosphatase 1 [Source:HGNC Symbol;Acc:HGNC:9228]
circRNA18010	0	0	0	0	0	0	46.453	46.6274	13.2404	0	68.6565	0	-inf	down	0.056886	0.687341	no	chr3	56745205	56745462	-	1	circRNA	ENST00000296315	ARHGEF3	chr3:56737355-56745204|chr3:56745462-56751055	Rho guanine nucleotide exchange factor 3 [Source:HGNC Symbol;Acc:HGNC:683]
circRNA20175	0	0	0	0	0	0	0	31.085	92.6825	0	34.3283	13.9215	-inf	down	0.056934	0.687341	no	chr16	15763796	15786732	-	7	circRNA	ENST00000396324	MYH11	chr16:15760658-15763795|chr16:15786732-15798659	myosin heavy chain 11 [Source:HGNC Symbol;Acc:HGNC:7569]
circRNA7624	0	38.7747	38.7908	0	15.7026	0	0	0	0	0	0	0	inf	up	0.056934	0.687341	no	chr9	72223120	72231181	+	4	circRNA	ENST00000545168	GDA	chr9:72219506-72223119|chr9:72231181-72241151	guanine deaminase [Source:HGNC Symbol;Acc:HGNC:4212]
circRNA875	13.8891	0	0	41.8771	0	13.3348	30.9686	124.34	66.2018	63.104	171.641	55.686	-2.8892	down	0.056999	0.687565	no	chr16	27346467	27352696	+	2	circRNA	ENST00000395762	IL4R	chr16:27345020-27346466|chr16:27352696-27355807	interleukin 4 receptor [Source:HGNC Symbol;Acc:HGNC:6015]
circRNA17560	0	0	0	0	0	0	15.4843	15.5425	39.7211	21.0347	68.6565	0	-inf	down	0.057141	0.688717	no	chr6	87371593	87375710	+	2	circRNA	ENST00000448282	SMIM8	chr6:87337166-87371592|chr6:87375710-87391779	small integral membrane protein 8 [Source:HGNC Symbol;Acc:HGNC:21401]
circRNA15165	0	0	0	0	0	13.3348	30.9686	0	0	0	34.3283	292.351	-4.74527	down	0.05726	0.688842	no	chr7	116110708	116112038	-	2	circRNA	ENST00000484212	TFEC	chr7:115984513-116110707|chr7:116112038-116159789	transcription factor EC [Source:HGNC Symbol;Acc:HGNC:11754]
circRNA17388	0	0	0	0	0	0	15.4843	0	39.7211	21.0347	68.6565	13.9215	-inf	down	0.057286	0.688842	no	chr7	42023468	42026412	-	3	circRNA	ENST00000395925	GLI3	chr7:41978748-42023467|chr7:42026412-42040037	GLI family zinc finger 3 [Source:HGNC Symbol;Acc:HGNC:4319]
circRNA17376	0	0	0	0	0	0	15.4843	0	13.2404	42.0693	34.3283	41.7645	-inf	down	0.057291	0.688842	no	chr7	32620404	32679130	-	10	circRNA	ENST00000417811	DPY19L1P1	chr7:32593306-32620403|chr7:32679130-32716717	DPY19L1 pseudogene 1 [Source:HGNC Symbol;Acc:HGNC:22395]
circRNA2163	416.672	168.024	206.884	69.7952	251.242	333.371	820.669	543.987	648.778	578.454	1047.01	612.545	-1.5559	down	0.057437	0.689375	no	chr5	154033791	154034967	-	3	circRNA	ENST00000351797	FAM114A2	chr5:154029580-154033790|chr5:154034967-154038856	family with sequence similarity 114 member A2 [Source:HGNC Symbol;Acc:HGNC:1333]
circRNA11197	0	0	0	13.959	0	0	0	170.967	13.2404	42.0693	120.149	0	-4.63328	down	0.057465	0.689375	no	chr10	124488422	124498128	+	3	circRNA	ENST00000392757	LHPP	chr10:124484326-124488421|chr10:124498128-124498327	phospholysine phosphohistidine inorganic pyrophosphate phosphatase [Source:HGNC Symbol;Acc:HGNC:30042]
circRNA19766	0	0	0	0	0	0	0	31.085	13.2404	10.5173	51.4924	55.686	-inf	down	0.057509	0.689375	no	chr10	77073097	77079550	-	2	circRNA	ENST00000604624	KCNMA1	chr10:77039637-77073096|chr10:77079550-77084636	potassium calcium-activated channel subfamily M alpha 1 [Source:HGNC Symbol;Acc:HGNC:6284]
circRNA458	27.7781	0	12.9303	0	0	0	387.108	62.1699	0	0	0	97.4504	-3.74743	down	0.05758	0.689375	no	chr11	106978619	106986131	-	2	circRNA	ENST00000526355	GUCY1A2	chr11:106940178-106978618|chr11:106986131-107017752	guanylate cyclase 1 soluble subunit alpha 2 [Source:HGNC Symbol;Acc:HGNC:4684]
circRNA17267	0	0	0	0	0	0	15.4843	0	0	0	102.985	83.5289	-inf	down	0.057655	0.689375	no	chr22	45700282	45729590	+	4	circRNA	ENST00000381061	ATXN10	chr22:45693078-45700281|chr22:45729590-45738730	ataxin 10 [Source:HGNC Symbol;Acc:HGNC:10549]
circRNA13005	0	0	0	0	15.7026	0	15.4843	31.085	52.9614	10.5173	51.4924	83.5289	-3.96411	down	0.057681	0.689375	no	chr16	71920739	71921453	+	2	circRNA	ENST00000544564	IST1	chr16:71917134-71920738|chr16:71921453-71922473	IST1, ESCRT-III associated factor [Source:HGNC Symbol;Acc:HGNC:28977]
circRNA18479	0	0	0	0	0	0	61.9373	0	13.2404	42.0693	0	27.843	-inf	down	0.057699	0.689375	no	chr1	48355670	48403882	-	6	circRNA	ENST00000371847	SPATA6	chr1:48305878-48355669|chr1:48403882-48411463	spermatogenesis associated 6 [Source:HGNC Symbol;Acc:HGNC:18309]
circRNA6372	0	77.5494	51.7211	0	0	40.0045	30.9686	0	0	0	0	0	2.45049	up	0.057708	0.689375	no	chr4	17814853	17815358	+	2	circRNA	ENST00000251496	NCAPG	chr4:17813145-17814852|chr4:17815358-17817260	non-SMC condensin I complex subunit G [Source:HGNC Symbol;Acc:HGNC:24304]
circRNA595	111.113	336.048	90.5119	111.672	329.755	160.018	464.53	885.921	317.769	420.693	772.386	668.231	-1.63156	down	0.057828	0.689851	no	chr10	84417771	84425893	+	2	circRNA	ENST00000372088	CCSER2	chr10:84373815-84417770|chr10:84425893-84438511	coiled-coil serine rich protein 2 [Source:HGNC Symbol;Acc:HGNC:29197]
circRNA22855	0	0	0	0	0	0	0	77.7124	0	0	0	125.293	-inf	down	0.057841	0.689851	no	chr1	50655442	50744775	-	4	circRNA	ENST00000396153	FAF1	chr1:50596216-50655441|chr1:50744775-50787999	Fas associated factor 1 [Source:HGNC Symbol;Acc:HGNC:3578]
circRNA344	152.78	155.099	64.6514	13.959	125.621	133.348	170.328	341.935	304.528	473.28	532.088	487.252	-1.83913	down	0.057895	0.689939	no	chr11	13413530	13421838	-	4	circRNA	ENST00000278174	BTBD10	chr11:13405856-13413529|chr11:13421838-13445023	BTB domain containing 10 [Source:HGNC Symbol;Acc:HGNC:21445]
circRNA3830	0	12.9249	0	0	0	0	30.9686	31.085	13.2404	52.5867	85.8206	27.843	-4.22406	down	0.058155	0.69219	no	chr12	1371833	1444750	+	3	circRNA	ENST00000543086	ERC1	chr12:1290012-1371832|chr12:1444750-1490092	ELKS/RAB6-interacting/CAST family member 1 [Source:HGNC Symbol;Acc:HGNC:17072]
circRNA18194	0	0	0	0	0	0	46.453	31.085	39.7211	0	17.1641	13.9215	-inf	down	0.058191	0.69219	no	chr2	43794457	43801709	+	5	circRNA	ENST00000260605	DYNC2LI1	chr2:43789721-43794456|chr2:43801709-43804641	dynein cytoplasmic 2 light intermediate chain 1 [Source:HGNC Symbol;Acc:HGNC:24595]
circRNA9497	0	0	12.9303	13.959	0	53.3393	0	93.2549	92.6825	157.76	0	180.979	-2.70924	down	0.05826	0.69219	no	chr6	136151160	136155758	+	3	circRNA	ENST00000308191	PDE7B	chr6:136149150-136151159|chr6:136155758-136173796	phosphodiesterase 7B [Source:HGNC Symbol;Acc:HGNC:8792]
circRNA2770	41.6672	0	0	0	0	0	30.9686	31.085	26.4807	42.0693	85.8206	97.4504	-2.91321	down	0.058271	0.69219	no	chr2	121757240	121761524	+	3	circRNA	ENST00000455432	TSN	chr2:121737185-121757239|chr2:121761524-121763004	translin [Source:HGNC Symbol;Acc:HGNC:12379]
circRNA321	27.7781	0	0	0	0	0	0	139.882	39.7211	42.0693	51.4924	55.686	-3.56541	down	0.058432	0.693546	no	chr12	124362126	124363799	-	2	circRNA	ENST00000405201	NCOR2	chr12:124356782-124362125|chr12:124363799-124372021	nuclear receptor corepressor 2 [Source:HGNC Symbol;Acc:HGNC:7673]
circRNA17365	0	0	0	0	0	0	15.4843	139.882	39.7211	0	0	0	-inf	down	0.058509	0.693904	no	chr7	28488175	28570537	+	4	circRNA	ENST00000357727	CREB5	chr7:28412917-28488174|chr7:28570537-28718752	cAMP responsive element binding protein 5 [Source:HGNC Symbol;Acc:HGNC:16844]
circRNA23813	0	0	0	0	0	0	0	0	13.2404	42.0693	34.3283	69.6074	-inf	down	0.058594	0.694355	no	chr12	108658738	108662158	-	2	circRNA	ENST00000261401	CORO1C	chr12:108657423-108658737|chr12:108662158-108678271	coronin 1C [Source:HGNC Symbol;Acc:HGNC:2254]
circRNA22730	0	0	0	0	0	0	0	77.7124	0	31.552	85.8206	0	-inf	down	0.058794	0.696168	no	chr1	16929846	16930594	+	4	circRNA	ENST00000375541	CROCC	chr1:16924479-16929845|chr1:16930594-16931290	ciliary rootlet coiled-coil, rootletin [Source:HGNC Symbol;Acc:HGNC:21299]
circRNA21774	0	0	0	0	0	0	0	15.5425	66.2018	10.5173	34.3283	27.843	-inf	down	0.058933	0.6969	no	chr4	38020591	38027879	+	3	circRNA	ENST00000508802	TBC1D1	chr4:38018443-38020590|chr4:38027879-38035587	TBC1 domain family member 1 [Source:HGNC Symbol;Acc:HGNC:11578]
circRNA6012	0	25.8498	0	0	0	0	30.9686	31.085	66.2018	31.552	137.313	13.9215	-3.58888	down	0.05895	0.6969	no	chr6	69233290	69239226	+	3	circRNA	ENST00000370598	ADGRB3	chr6:69076038-69233289|chr6:69239226-69324871	adhesion G protein-coupled receptor B3 [Source:HGNC Symbol;Acc:HGNC:945]
circRNA2230	55.5563	116.324	77.5816	27.9181	94.2159	40.0045	139.359	466.274	92.6825	305.003	446.267	306.273	-2.09286	down	0.059023	0.697206	no	chr4	39737420	39774933	+	4	circRNA	ENST00000261427	UBE2K	chr4:39698390-39737419|chr4:39774933-39777681	ubiquitin conjugating enzyme E2 K [Source:HGNC Symbol;Acc:HGNC:4914]
circRNA727	55.5563	77.5494	0	0	0	0	61.9373	124.34	92.6825	63.104	171.641	69.6074	-2.1317	down	0.059143	0.698067	no	chr17	38361711	38368050	+	4	circRNA	ENST00000613678	SOCS7	chr17:38353032-38361710|chr17:38368050-38377713	suppressor of cytokine signaling 7 [Source:HGNC Symbol;Acc:HGNC:29846]
circRNA3913	0	12.9249	0	0	15.7026	0	15.4843	62.1699	26.4807	42.0693	51.4924	125.293	-3.49601	down	0.05924	0.698654	no	chr12	56670275	56673065	-	4	circRNA	ENST00000537473	PTGES3	chr12:56666266-56670274|chr12:56673065-56687249	prostaglandin E synthase 3 [Source:HGNC Symbol;Acc:HGNC:16049]
circRNA9159	0	0	12.9303	13.959	0	0	30.9686	15.5425	39.7211	63.104	68.6565	83.5289	-3.48716	down	0.059423	0.699792	no	chr20	41512846	41533570	-	3	circRNA	ENST00000373233	CHD6	chr20:41499357-41512845|chr20:41533570-41551304	chromodomain helicase DNA binding protein 6 [Source:HGNC Symbol;Acc:HGNC:19057]
circRNA22930	0	0	0	0	0	0	0	31.085	52.9614	0	34.3283	41.7645	-inf	down	0.059431	0.699792	no	chr1	112581992	112598086	-	5	circRNA	ENST00000361846	ST7L	chr1:112578417-112581991|chr1:112598086-112600793	suppression of tumorigenicity 7 like [Source:HGNC Symbol;Acc:HGNC:18441]
circRNA4465	0	12.9249	0	0	0	0	15.4843	31.085	52.9614	157.76	0	13.9215	-4.3912	down	0.059507	0.70013	no	chr10	115120185	115171292	+	7	circRNA	ENST00000355044	ATRNL1	chr10:115094043-115120184|chr10:115171292-115215696	attractin like 1 [Source:HGNC Symbol;Acc:HGNC:29063]
circRNA322	27.7781	38.7747	64.6514	69.7952	62.8106	106.679	77.4216	341.935	225.086	199.829	446.267	292.351	-2.09506	down	0.059625	0.700961	no	chr12	124419957	124430787	-	5	circRNA	ENST00000405201	NCOR2	chr12:124402561-124419956|chr12:124430787-124437929	nuclear receptor corepressor 2 [Source:HGNC Symbol;Acc:HGNC:7673]
circRNA7451	0	12.9249	0	0	0	40.0045	0	46.6274	105.923	84.1387	68.6565	97.4504	-2.92791	down	0.059697	0.701164	no	chr1	179120190	179121867	-	2	circRNA	ENST00000502732	ABL2	chr1:179118764-179120189|chr1:179121867-179126376	ABL proto-oncogene 2, non-receptor tyrosine kinase [Source:HGNC Symbol;Acc:HGNC:77]
circRNA19475	0	0	0	0	0	0	0	15.5425	13.2404	0	51.4924	97.4504	-inf	down	0.059737	0.701164	no	chr11	19984125	20036097	+	2	circRNA	ENST00000360655	NAV2	chr11:19949080-19984124|chr11:20036097-20043980	neuron navigator 2 [Source:HGNC Symbol;Acc:HGNC:15997]
circRNA13355	0	0	0	0	15.7026	0	0	62.1699	39.7211	21.0347	68.6565	55.686	-3.977	down	0.059835	0.701626	no	chr7	36281115	36297187	+	4	circRNA	ENST00000242108	EEPD1	chr7:36239036-36281114|chr7:36297187-36299006	endonuclease/exonuclease/phosphatase family domain containing 1 [Source:HGNC Symbol;Acc:HGNC:22223]
circRNA630	27.7781	103.399	38.7908	27.9181	62.8106	26.6697	139.359	264.222	198.605	115.691	257.462	222.744	-2.05976	down	0.059896	0.701626	no	chr10	110596398	110598290	+	2	circRNA	ENST00000361804	SMC3	chr10:110593223-110596397|chr10:110598290-110599653	structural maintenance of chromosomes 3 [Source:HGNC Symbol;Acc:HGNC:2468]
circRNA1455	250.003	697.945	284.466	125.631	439.674	413.38	805.185	1352.2	940.066	546.902	1270.15	1197.25	-1.46682	down	0.059941	0.701626	no	chr20	32366384	32369123	+	2	circRNA	ENST00000542461	ASXL1	chr20:32358832-32366383|chr20:32369123-32372163	additional sex combs like 1, transcriptional regulator [Source:HGNC Symbol;Acc:HGNC:18318]
circRNA6677	0	77.5494	0	0	47.1079	40.0045	77.4216	170.967	66.2018	168.277	223.134	55.686	-2.20969	down	0.059966	0.701626	no	chr3	119500695	119513719	+	4	circRNA	ENST00000494664	TIMMDC1	chr3:119498927-119500694|chr3:119513719-119517204	translocase of inner mitochondrial membrane domain containing 1 [Source:HGNC Symbol;Acc:HGNC:1321]
circRNA2393	27.7781	12.9249	25.8605	0	0	53.3393	0	15.5425	0	0	0	0	2.94758	up	0.060045	0.701995	no	chr3	12379704	12392752	+	3	circRNA	ENST00000397010	PPARG	chr3:12312453-12379703|chr3:12392752-12405881	peroxisome proliferator activated receptor gamma [Source:HGNC Symbol;Acc:HGNC:9236]
circRNA21091	0	0	0	0	0	0	0	15.5425	13.2404	21.0347	34.3283	69.6074	-inf	down	0.060171	0.702913	no	chr21	32694228	32695282	-	2	circRNA	ENST00000357345	SYNJ1	chr21:32688367-32694227|chr21:32695282-32699837	synaptojanin 1 [Source:HGNC Symbol;Acc:HGNC:11503]
circRNA1759	55.5563	193.874	323.257	209.385	266.945	253.362	201.296	823.751	622.297	673.11	944.027	863.132	-1.66416	down	0.060408	0.704066	no	chr7	129014979	129018157	-	3	circRNA	ENST00000265388	TNPO3	chr7:129005159-129014978|chr7:129018157-129054650	transportin 3 [Source:HGNC Symbol;Acc:HGNC:17103]
circRNA18664	0	0	0	0	0	0	15.4843	31.085	26.4807	10.5173	51.4924	13.9215	-inf	down	0.060435	0.704066	no	chr9	5825092	5831028	-	2	circRNA	ENST00000462592	ERMP1	chr9:5824001-5825091|chr9:5831028-5832689	endoplasmic reticulum metallopeptidase 1 [Source:HGNC Symbol;Acc:HGNC:23703]
circRNA16499	0	0	0	0	0	0	30.9686	31.085	0	0	154.477	0	-inf	down	0.060444	0.704066	no	chr10	7615982	7617282	-	2	circRNA	ENST00000397146	ITIH5	chr10:7586069-7615981|chr10:7617282-7637227	inter-alpha-trypsin inhibitor heavy chain family member 5 [Source:HGNC Symbol;Acc:HGNC:21449]
circRNA1071	27.7781	64.6245	51.7211	97.7132	62.8106	0	92.9059	481.817	119.163	241.899	154.477	250.587	-2.13793	down	0.06046	0.704066	no	chr15	76292431	76295737	-	3	circRNA	ENST00000557943	ETFA	chr15:76287945-76292430|chr15:76295737-76311349	electron transfer flavoprotein alpha subunit [Source:HGNC Symbol;Acc:HGNC:3481]
circRNA3149	83.3344	258.498	543.071	153.549	188.432	146.683	588.404	730.497	595.816	536.384	892.535	529.017	-1.49539	down	0.060974	0.708438	no	chr1	117402186	117414831	+	3	circRNA	ENST00000356554	MAN1A2	chr1:117368485-117402185|chr1:117414831-117420568	mannosidase alpha class 1A member 2 [Source:HGNC Symbol;Acc:HGNC:6822]
circRNA21256	0	0	0	0	0	0	0	46.6274	26.4807	31.552	0	41.7645	-inf	down	0.060977	0.708438	no	chr7	98957981	98962427	+	4	circRNA	ENST00000355540	TRRAP	chr7:98956533-98957980|chr7:98962427-98964628	transformation/transcription domain associated protein [Source:HGNC Symbol;Acc:HGNC:12347]
circRNA4593	0	25.8498	0	27.9181	47.1079	13.3348	0	0	0	0	0	13.9215	3.03631	up	0.060979	0.708438	no	chr17	42324711	42325061	-	2	circRNA	ENST00000264657	STAT3	chr17:42323625-42324710|chr17:42325061-42326115	signal transducer and activator of transcription 3 [Source:HGNC Symbol;Acc:HGNC:11364]
circRNA12930	0	0	0	0	15.7026	13.3348	15.4843	62.1699	52.9614	52.5867	102.985	27.843	-3.43492	down	0.061226	0.71075	no	chr17	60633853	60648082	+	2	circRNA	ENST00000629650	PPM1D	chr17:60623749-60633852|chr17:60648082-60656598	protein phosphatase, Mg2+/Mn2+ dependent 1D [Source:HGNC Symbol;Acc:HGNC:9277]
circRNA6708	0	25.8498	0	0	0	0	0	93.2549	13.2404	10.5173	120.149	97.4504	-3.69426	down	0.061321	0.711295	no	chr3	136026832	136049361	+	3	circRNA	ENST00000264977	PPP2R3A	chr3:136003493-136026831|chr3:136049361-136070477	protein phosphatase 2 regulatory subunit B''alpha [Source:HGNC Symbol;Acc:HGNC:9307]
circRNA17504	0	0	0	0	0	0	30.9686	31.085	79.4422	10.5173	0	0	-inf	down	0.061569	0.712263	no	chr6	28271854	28272787	+	2	circRNA	ENST00000421553	ZSCAN26	chr6:28267213-28271853|chr6:28272787-28276194	zinc finger and SCAN domain containing 26 [Source:HGNC Symbol;Acc:HGNC:12978]
circRNA4305	0	51.6996	25.8605	41.8771	0	0	0	15.5425	0	0	0	0	2.94196	up	0.061585	0.712263	no	chr10	13172376	13172765	+	2	circRNA	ENST00000378714	MCM10	chr10:13171263-13172375|chr10:13172765-13175509	minichromosome maintenance 10 replication initiation factor [Source:HGNC Symbol;Acc:HGNC:18043]
circRNA7768	0	25.8498	0	0	0	0	30.9686	62.1699	52.9614	42.0693	17.1641	41.7645	-3.25686	down	0.061593	0.712263	no	chr8	30177126	30180630	+	3	circRNA	ENST00000221114	DCTN6	chr8:30175190-30177125|chr8:30180630-30183074	dynactin subunit 6 [Source:HGNC Symbol;Acc:HGNC:16964]
circRNA23339	0	0	0	0	0	0	0	46.6274	13.2404	21.0347	68.6565	13.9215	-inf	down	0.061597	0.712263	no	chr9	133408768	133412921	-	4	circRNA	ENST00000371942	REXO4	chr9:133407881-133408767|chr9:133412921-133414664	REX4 homolog, 3'-5' exonuclease [Source:HGNC Symbol;Acc:HGNC:12820]
circRNA20158	0	0	0	0	0	0	0	62.1699	26.4807	21.0347	0	41.7645	-inf	down	0.061772	0.713387	no	chr16	15738565	15741891	-	4	circRNA	ENST00000396324	MYH11	chr16:15737620-15738564|chr16:15741891-15745128	myosin heavy chain 11 [Source:HGNC Symbol;Acc:HGNC:7569]
circRNA18770	0	0	0	0	0	0	15.4843	15.5425	26.4807	21.0347	51.4924	13.9215	-inf	down	0.061841	0.713387	no	chr8	1876571	1909470	+	11	circRNA	ENST00000635855	KBTBD11-OT1	chr8:1869250-1876570|chr8:1909470-1922963	KBTBD11 overlapping transcript 1 [Source:NCBI gene;Acc:104266957]
circRNA20102	0	0	0	0	0	0	0	46.6274	52.9614	10.5173	0	41.7645	-inf	down	0.061876	0.713387	no	chr17	82178474	82179189	-	2	circRNA	ENST00000389641	CCDC57	chr17:82172860-82178473|chr17:82179189-82183773	coiled-coil domain containing 57 [Source:HGNC Symbol;Acc:HGNC:27564]
circRNA242	13.8891	12.9249	12.9303	13.959	31.4053	13.3348	46.453	170.967	66.2018	73.6214	274.626	55.686	-2.80411	down	0.061887	0.713387	no	chr12	53027782	53028188	+	2	circRNA	ENST00000262056	EIF4B	chr12:53022627-53027781|chr12:53028188-53033805	eukaryotic translation initiation factor 4B [Source:HGNC Symbol;Acc:HGNC:3285]
circRNA2746	83.3344	25.8498	51.7211	27.9181	15.7026	0	170.328	186.51	158.884	84.1387	205.97	83.5289	-2.12048	down	0.062009	0.714238	no	chr2	108771701	108773046	+	3	circRNA	ENST00000283195	RANBP2	chr2:108768388-108771700|chr2:108773046-108775731	RAN binding protein 2 [Source:HGNC Symbol;Acc:HGNC:9848]
circRNA5354	0	25.8498	0	0	0	26.6697	0	77.7124	52.9614	115.691	257.462	27.843	-3.33961	down	0.062102	0.714752	no	chr19	40241938	40242687	-	2	circRNA	ENST00000392038	AKT2	chr19:40240110-40241937|chr19:40242687-40255157	AKT serine/threonine kinase 2 [Source:HGNC Symbol;Acc:HGNC:392]
circRNA7682	0	12.9249	0	0	15.7026	0	61.9373	31.085	52.9614	52.5867	51.4924	41.7645	-3.34964	down	0.062387	0.717475	no	chr9	111440372	111444494	-	3	circRNA	ENST00000338205	KIAA0368	chr9:111437108-111440371|chr9:111444494-111451424	KIAA0368 [Source:HGNC Symbol;Acc:HGNC:29020]
circRNA17311	0	0	0	0	0	0	15.4843	31.085	13.2404	31.552	34.3283	13.9215	-inf	down	0.062593	0.719285	no	chr21	15799757	15842540	+	13	circRNA	ENST00000285679	USP25	chr21:15791664-15799756|chr21:15842540-15864267	ubiquitin specific peptidase 25 [Source:HGNC Symbol;Acc:HGNC:12624]
circRNA12631	0	0	0	0	15.7026	0	15.4843	46.6274	66.2018	63.104	51.4924	0	-3.95134	down	0.062799	0.721092	no	chr12	68650400	68654252	+	3	circRNA	ENST00000250559	RAP1B	chr12:68648781-68650399|chr12:68654252-68656305	RAP1B, member of RAS oncogene family [Source:HGNC Symbol;Acc:HGNC:9857]
circRNA167	13.8891	0	0	0	15.7026	0	77.4216	46.6274	39.7211	31.552	120.149	0	-3.41424	down	0.062923	0.721755	no	chr12	350621	354234	-	3	circRNA	ENST00000399788	KDM5A	chr12:334422-350620|chr12:354234-355157	lysine demethylase 5A [Source:HGNC Symbol;Acc:HGNC:9886]
circRNA3777	0	12.9249	12.9303	0	0	0	77.4216	15.5425	105.923	31.552	120.149	0	-3.76125	down	0.062991	0.721755	no	chr13	49167244	49175541	+	5	circRNA	ENST00000492622	FNDC3A	chr13:49145935-49167243|chr13:49175541-49178567	fibronectin type III domain containing 3A [Source:HGNC Symbol;Acc:HGNC:20296]
circRNA18068	0	0	0	0	0	0	30.9686	31.085	39.7211	10.5173	34.3283	0	-inf	down	0.063003	0.721755	no	chr3	131162408	131170887	+	4	circRNA	ENST00000510769	NEK11	chr3:131133956-131162407|chr3:131170887-131228527	NIMA related kinase 11 [Source:HGNC Symbol;Acc:HGNC:18593]
circRNA6144	0	77.5494	12.9303	0	15.7026	0	123.875	139.882	39.7211	52.5867	68.6565	97.4504	-2.29798	down	0.063303	0.724631	no	chr5	62449927	62451933	+	2	circRNA	ENST00000424533	IPO11	chr5:62443083-62449926|chr5:62451933-62467130	importin 11 [Source:HGNC Symbol;Acc:HGNC:20628]
circRNA537	13.8891	0	0	0	0	0	61.9373	15.5425	13.2404	21.0347	17.1641	97.4504	-4.02666	down	0.063663	0.728061	no	chr10	31387124	31461237	+	2	circRNA	ENST00000488625	ZEB1	chr10:31374964-31387123|chr10:31461237-31495775	zinc finger E-box binding homeobox 1 [Source:HGNC Symbol;Acc:HGNC:11642]
circRNA17881	0	0	0	0	0	0	15.4843	0	52.9614	0	17.1641	69.6074	-inf	down	0.063701	0.728061	no	chr4	105446383	105456745	-	4	circRNA	ENST00000341695	PPA2	chr4:105438036-105446382|chr4:105456745-105473893	pyrophosphatase (inorganic) 2 [Source:HGNC Symbol;Acc:HGNC:28883]
circRNA2075	13.8891	0	0	0	0	0	15.4843	62.1699	26.4807	21.0347	137.313	13.9215	-4.31476	down	0.063852	0.729223	no	chr5	77449760	77489572	-	7	circRNA	ENST00000296679	WDR41	chr5:77440997-77449759|chr5:77489572-77492169	WD repeat domain 41 [Source:HGNC Symbol;Acc:HGNC:25601]
circRNA25333	0	0	0	0	0	0	0	0	26.4807	63.104	51.4924	13.9215	-inf	down	0.063967	0.729973	no	chr6	138907495	138908816	-	2	circRNA	ENST00000450536	REPS1	chr6:138905132-138907494|chr6:138908816-138911275	RALBP1 associated Eps domain containing 1 [Source:HGNC Symbol;Acc:HGNC:15578]
circRNA2751	125.002	0	25.8605	139.59	78.5132	66.6741	216.781	326.392	185.365	157.76	429.103	250.587	-1.84587	down	0.064136	0.731026	no	chr2	112299849	112300029	+	1	circRNA	ENST00000409871	ZC3H6	chr2:112276026-112299848|chr2:112300029-112303228	zinc finger CCCH-type containing 6 [Source:HGNC Symbol;Acc:HGNC:24762]
circRNA935	13.8891	25.8498	12.9303	69.7952	15.7026	26.6697	92.9059	108.797	238.326	52.5867	274.626	125.293	-2.43687	down	0.064158	0.731026	no	chr16	74459682	74463479	-	4	circRNA	ENST00000205061	GLG1	chr16:74457994-74459681|chr16:74463479-74465675	golgi glycoprotein 1 [Source:HGNC Symbol;Acc:HGNC:4316]
circRNA19809	0	0	0	0	0	0	0	15.5425	26.4807	21.0347	85.8206	13.9215	-inf	down	0.064269	0.731258	no	chr10	95339133	95410777	-	18	circRNA	ENST00000371227	SORBS1	chr10:95337294-95339132|chr10:95410777-95414493	sorbin and SH3 domain containing 1 [Source:HGNC Symbol;Acc:HGNC:14565]
circRNA2700	55.5563	0	38.7908	0	47.1079	0	170.328	62.1699	92.6825	84.1387	120.149	97.4504	-2.14793	down	0.064321	0.731258	no	chr2	64572946	64585545	+	4	circRNA	ENST00000238855	AFTPH	chr2:64569679-64572945|chr2:64585545-64591887	aftiphilin [Source:HGNC Symbol;Acc:HGNC:25951]
circRNA20159	0	0	0	0	0	0	0	77.7124	26.4807	0	34.3283	27.843	-inf	down	0.064338	0.731258	no	chr16	15738565	15745237	-	5	circRNA	ENST00000396324	MYH11	chr16:15737620-15738564|chr16:15745237-15747569	myosin heavy chain 11 [Source:HGNC Symbol;Acc:HGNC:7569]
circRNA3128	13.8891	0	0	0	0	0	77.4216	31.085	26.4807	10.5173	34.3283	27.843	-3.90231	down	0.064376	0.731258	no	chr1	97515726	97549744	-	2	circRNA	ENST00000370192	DPYD	chr1:97450223-97515725|chr1:97549744-97573759	dihydropyrimidine dehydrogenase [Source:HGNC Symbol;Acc:HGNC:3012]
circRNA9110	0	0	25.8605	0	0	0	0	31.085	52.9614	73.6214	34.3283	83.5289	-3.41336	down	0.064503	0.732139	no	chr20	2986765	2988474	+	3	circRNA	ENST00000380393	PTPRA	chr20:2975241-2986764|chr20:2988474-3005055	protein tyrosine phosphatase, receptor type A [Source:HGNC Symbol;Acc:HGNC:9664]
circRNA3759	0	77.5494	0	0	0	13.3348	61.9373	77.7124	66.2018	63.104	171.641	27.843	-2.36576	down	0.064596	0.732344	no	chr13	41811225	41833531	-	5	circRNA	ENST00000379310	VWA8	chr13:41787543-41811224|chr13:41833531-41865735	von Willebrand factor A domain containing 8 [Source:HGNC Symbol;Acc:HGNC:29071]
circRNA3624	13.8891	77.5494	142.233	69.7952	109.918	66.6741	216.781	357.477	397.211	336.555	446.267	83.5289	-1.93671	down	0.06462	0.732344	no	chr8	140818277	140890769	-	8	circRNA	ENST00000522684	PTK2	chr8:140803650-140818276|chr8:140890769-140925660	protein tyrosine kinase 2 [Source:HGNC Symbol;Acc:HGNC:9611]
circRNA24901	0	0	0	0	0	0	0	0	79.4422	31.552	0	41.7645	-inf	down	0.064931	0.735305	no	chr18	54271360	54284013	+	6	circRNA	ENST00000579534	POLI	chr18:54269661-54271359|chr18:54284013-54287280	DNA polymerase iota [Source:HGNC Symbol;Acc:HGNC:9182]
circRNA13634	0	0	0	0	15.7026	0	0	77.7124	26.4807	31.552	51.4924	55.686	-3.95142	down	0.065132	0.736536	no	chr4	182600924	182653893	+	3	circRNA	ENST00000511685	TENM3	chr4:182346929-182600923|chr4:182653893-182673004	teneurin transmembrane protein 3 [Source:HGNC Symbol;Acc:HGNC:29944]
circRNA3974	0	12.9249	12.9303	0	0	0	15.4843	93.2549	13.2404	94.656	85.8206	27.843	-3.67525	down	0.065175	0.736536	no	chr12	104120400	104123423	-	3	circRNA	ENST00000240055	NFYB	chr12:104119769-104120399|chr12:104123423-104126113	nuclear transcription factor Y subunit beta [Source:HGNC Symbol;Acc:HGNC:7805]
circRNA18649	0	0	0	0	0	0	15.4843	15.5425	26.4807	10.5173	68.6565	13.9215	-inf	down	0.06526	0.736536	no	chr1	243512324	243573048	-	5	circRNA	ENST00000336199	AKT3	chr1:243499786-243512323|chr1:243573048-243613670	AKT serine/threonine kinase 3 [Source:HGNC Symbol;Acc:HGNC:393]
circRNA1199	55.5563	38.7747	38.7908	55.8361	47.1079	93.3438	216.781	170.967	198.605	199.829	377.611	194.901	-2.04427	down	0.065285	0.736536	no	chr14	73147795	73148094	+	2	circRNA	ENST00000557356	PSEN1	chr14:73136448-73147794|chr14:73148094-73170796	presenilin 1 [Source:HGNC Symbol;Acc:HGNC:9508]
circRNA1939	180.558	12.9249	219.815	41.8771	94.2159	53.3393	294.202	264.222	397.211	147.243	308.954	501.174	-1.66626	down	0.065352	0.736536	no	chr6	116689320	116692392	+	3	circRNA	ENST00000413340	KPNA5	chr6:116681552-116689319|chr6:116692392-116698703	karyopherin subunit alpha 5 [Source:HGNC Symbol;Acc:HGNC:6398]
circRNA2462	13.8891	25.8498	64.6514	111.672	47.1079	200.022	387.108	217.595	383.97	126.208	377.611	167.058	-1.84111	down	0.065354	0.736536	no	chr3	71015549	71053773	-	5	circRNA	ENST00000318789	FOXP1	chr3:71001059-71015548|chr3:71053773-71112535	forkhead box P1 [Source:HGNC Symbol;Acc:HGNC:3823]
circRNA18900	0	0	0	0	0	0	0	31.085	0	0	68.6565	83.5289	-inf	down	0.065388	0.736536	no	chrX	19950753	19970298	-	7	circRNA	ENST00000379687	BCLAF3	chrX:19937532-19950752|None	BCLAF1 and THRAP3 family member 3 [Source:HGNC Symbol;Acc:HGNC:27413]
circRNA10400	0	0	12.9303	0	0	0	0	62.1699	0	147.243	171.641	0	-4.88117	down	0.065438	0.736538	no	chr1	1804419	1817875	-	4	circRNA	ENST00000610897	GNB1	chr1:1793311-1804418|chr1:1817875-1825396	G protein subunit beta 1 [Source:HGNC Symbol;Acc:HGNC:4396]
circRNA5232	0	25.8498	0	0	0	0	108.39	77.7124	13.2404	42.0693	17.1641	13.9215	-3.39802	down	0.065583	0.736816	no	chr14	91481576	91490802	-	3	circRNA	ENST00000554684	PPP4R3A	chr14:91476986-91481575|chr14:91490802-91509505	protein phosphatase 4 regulatory subunit 3A [Source:HGNC Symbol;Acc:HGNC:20219]
circRNA29371	0	0	0	0	0	0	0	0	0	31.552	0	167.058	-inf	down	0.065588	0.736816	no	chr1	86124845	86146183	-	2	circRNA	ENST00000370571	COL24A1	chr1:86115378-86124844|chr1:86146183-86156340	collagen type XXIV alpha 1 chain [Source:HGNC Symbol;Acc:HGNC:20821]
circRNA11334	0	0	0	13.959	0	26.6697	30.9686	62.1699	39.7211	94.656	85.8206	27.843	-3.06996	down	0.065612	0.736816	no	chr16	53873786	53879987	+	2	circRNA	ENST00000636491	FTO	chr16:53844298-53873785|chr16:53879987-53888831	FTO, alpha-ketoglutarate dependent dioxygenase [Source:HGNC Symbol;Acc:HGNC:24678]
circRNA6769	0	12.9249	0	0	0	0	0	108.797	13.2404	21.0347	120.149	13.9215	-4.4224	down	0.065844	0.73788	no	chr3	183650296	183665039	+	3	circRNA	ENST00000242810	KLHL24	chr3:183643542-183650295|chr3:183665039-183671033	kelch like family member 24 [Source:HGNC Symbol;Acc:HGNC:25947]
circRNA23098	0	0	0	0	0	0	0	46.6274	39.7211	21.0347	51.4924	0	-inf	down	0.065868	0.73788	no	chr1	227747692	227748233	+	1	circRNA	ENST00000366759	SNAP47	chr1:227735499-227747691|chr1:227748233-227758994	synaptosome associated protein 47 [Source:HGNC Symbol;Acc:HGNC:30669]
circRNA19231	0	0	0	0	0	0	0	93.2549	52.9614	0	34.3283	0	-inf	down	0.065897	0.73788	no	chr12	53719739	53722183	-	3	circRNA	ENST00000262059	CALCOCO1	chr12:53716415-53719738|chr12:53722183-53723592	calcium binding and coiled-coil domain 1 [Source:HGNC Symbol;Acc:HGNC:29306]
circRNA26404	0	0	0	0	0	0	0	0	52.9614	63.104	17.1641	13.9215	-inf	down	0.065937	0.73788	no	chr1	151411625	151412396	-	2	circRNA	ENST00000392723	POGZ	chr1:151408828-151411624|chr1:151412396-151423396	pogo transposable element derived with ZNF domain [Source:HGNC Symbol;Acc:HGNC:18801]
circRNA27934	0	0	0	0	0	0	0	0	0	73.6214	68.6565	27.843	-inf	down	0.065956	0.73788	no	chr14	75782487	75783530	+	2	circRNA	ENST00000557636	TTLL5	chr14:75779702-75782486|chr14:75783530-75792912	tubulin tyrosine ligase like 5 [Source:HGNC Symbol;Acc:HGNC:19963]
circRNA26444	0	0	0	0	0	0	0	0	26.4807	31.552	51.4924	41.7645	-inf	down	0.066133	0.739301	no	chr1	173992755	173993135	-	1	circRNA	ENST00000367696	RC3H1	chr1:173984619-173992754|chr1:173993135-174022095	ring finger and CCCH-type domains 1 [Source:HGNC Symbol;Acc:HGNC:29434]
circRNA23147	0	0	0	0	0	0	0	31.085	0	21.0347	51.4924	55.686	-inf	down	0.066307	0.740663	no	chr1	243613671	243695716	-	6	circRNA	ENST00000336199	AKT3	chr1:243573048-243613670|chr1:243695716-243843124	AKT serine/threonine kinase 3 [Source:HGNC Symbol;Acc:HGNC:393]
circRNA29672	0	0	0	0	0	0	0	0	0	10.5173	120.149	69.6074	-inf	down	0.066375	0.740663	no	chr8	30700081	30703240	-	2	circRNA	ENST00000221130	GSR	chr8:30696479-30700080|chr8:30703240-30708071	glutathione-disulfide reductase [Source:HGNC Symbol;Acc:HGNC:4623]
circRNA22088	0	0	0	0	0	0	0	62.1699	0	115.691	0	0	-inf	down	0.066405	0.740663	no	chr3	64146830	64147702	-	1	circRNA	ENST00000638394	PRICKLE2	chr3:64099925-64146829|chr3:64147702-64153181	prickle planar cell polarity protein 2 [Source:HGNC Symbol;Acc:HGNC:20340]
circRNA20467	0	0	0	0	0	0	0	31.085	39.7211	31.552	51.4924	0	-inf	down	0.066808	0.744516	no	chr15	83819811	83820047	+	1	circRNA	ENST00000286744	ADAMTSL3	chr15:83804695-83819810|chr15:83820047-83838088	ADAMTS like 3 [Source:HGNC Symbol;Acc:HGNC:14633]
circRNA10727	0	0	25.8605	0	0	26.6697	15.4843	108.797	79.4422	115.691	188.805	0	-3.27423	down	0.066851	0.744516	no	chr9	33960826	33989126	-	6	circRNA	ENST00000379238	UBAP2	chr9:33956146-33960825|chr9:33989126-33996222	ubiquitin associated protein 2 [Source:HGNC Symbol;Acc:HGNC:14185]
circRNA3099	27.7781	12.9249	77.5816	27.9181	47.1079	26.6697	77.4216	202.052	211.846	168.277	308.954	69.6074	-2.23858	down	0.067353	0.749543	no	chr1	77631850	77641655	-	4	circRNA	ENST00000370801	ZZZ3	chr1:77584655-77631849|chr1:77641655-77682584	zinc finger ZZ-type containing 3 [Source:HGNC Symbol;Acc:HGNC:24523]
circRNA20320	0	0	0	0	0	0	0	15.5425	13.2404	84.1387	17.1641	13.9215	-inf	down	0.067462	0.750192	no	chr15	33584395	33601552	+	3	circRNA	ENST00000634891	RYR3	chr15:33581643-33584394|chr15:33601552-33603122	ryanodine receptor 3 [Source:HGNC Symbol;Acc:HGNC:10485]
circRNA1041	55.5563	12.9249	0	13.959	0	13.3348	77.4216	217.595	52.9614	42.0693	102.985	69.6074	-2.55449	down	0.067534	0.750305	no	chr15	64118117	64123546	+	3	circRNA	ENST00000560829	SNX1	chr15:64112684-64118116|chr15:64123546-64127173	sorting nexin 1 [Source:HGNC Symbol;Acc:HGNC:11172]
circRNA21323	0	0	0	0	0	0	0	15.5425	66.2018	31.552	0	27.843	-inf	down	0.067646	0.750305	no	chr7	151117095	151118632	+	5	circRNA	ENST00000463381	AGAP3	chr7:151116851-151117094|chr7:151118632-151119986	ArfGAP with GTPase domain, ankyrin repeat and PH domain 3 [Source:HGNC Symbol;Acc:HGNC:16923]
circRNA22634	0	0	0	0	0	0	0	93.2549	0	0	0	97.4504	-inf	down	0.067663	0.750305	no	chr2	219421340	219423820	+	2	circRNA	ENST00000373960	DES	chr2:219420953-219421339|chr2:219423820-219425662	desmin [Source:HGNC Symbol;Acc:HGNC:2770]
circRNA22903	0	0	0	0	0	0	0	31.085	13.2404	42.0693	0	55.686	-inf	down	0.067675	0.750305	no	chr1	85190057	85190752	-	1	circRNA	ENST00000341460	SYDE2	chr1:85183200-85190056|chr1:85190752-85200251	synapse defective Rho GTPase homolog 2 [Source:HGNC Symbol;Acc:HGNC:25841]
circRNA21255	0	0	0	0	0	0	0	31.085	79.4422	42.0693	0	0	-inf	down	0.067872	0.750406	no	chr7	98228014	98229166	-	2	circRNA	ENST00000447648	TECPR1	chr7:98225102-98228013|chr7:98229166-98230960	tectonin beta-propeller repeat containing 1 [Source:HGNC Symbol;Acc:HGNC:22214]
circRNA3704	0	64.6245	0	13.959	47.1079	13.3348	123.875	108.797	66.2018	115.691	120.149	97.4504	-2.18494	down	0.067906	0.750406	no	chrX	135545423	135556300	+	7	circRNA	ENST00000639893	INTS6L	chrX:135521318-135545422|chrX:135556300-135569336	integrator complex subunit 6 like [Source:HGNC Symbol;Acc:HGNC:27334]
circRNA14199	0	0	0	0	15.7026	0	15.4843	46.6274	26.4807	31.552	51.4924	41.7645	-3.76449	down	0.067918	0.750406	no	chr8	105419144	105561481	+	3	circRNA	ENST00000407775	ZFPM2	chr8:105318981-105419143|chr8:105561481-105634245	zinc finger protein, FOG family member 2 [Source:HGNC Symbol;Acc:HGNC:16700]
circRNA23742	0	0	0	0	0	0	0	0	92.6825	73.6214	0	0	-inf	down	0.067964	0.750406	no	chr12	41506456	41509913	+	2	circRNA	ENST00000402685	PDZRN4	chr12:41194188-41506455|chr12:41509913-41552655	PDZ domain containing ring finger 4 [Source:HGNC Symbol;Acc:HGNC:30552]
circRNA222	13.8891	12.9249	25.8605	0	15.7026	13.3348	15.4843	124.34	105.923	21.0347	137.313	194.901	-2.87393	down	0.067978	0.750406	no	chr12	46239679	46243314	-	2	circRNA	ENST00000398637	SLC38A1	chr12:46229639-46239678|chr12:46243314-46268525	solute carrier family 38 member 1 [Source:HGNC Symbol;Acc:HGNC:13447]
circRNA5355	0	77.5494	25.8605	125.631	31.4053	0	77.4216	295.307	278.048	73.6214	120.149	153.136	-1.93759	down	0.068005	0.750406	no	chr19	40583398	40583717	+	2	circRNA	ENST00000291842	SHKBP1	chr19:40582466-40583397|chr19:40583717-40586773	SH3KBP1 binding protein 1 [Source:HGNC Symbol;Acc:HGNC:19214]
circRNA29200	0	0	0	0	0	0	0	0	0	73.6214	137.313	0	-inf	down	0.068039	0.750406	no	chr2	208345111	208348023	+	3	circRNA	ENST00000264380	PIKFYVE	chr2:208342649-208345110|chr2:208348023-208350023	phosphoinositide kinase, FYVE-type zinc finger containing [Source:HGNC Symbol;Acc:HGNC:23785]
circRNA19818	0	0	0	0	0	0	0	62.1699	26.4807	0	68.6565	13.9215	-inf	down	0.068091	0.750421	no	chr10	95397220	95410777	-	4	circRNA	ENST00000371227	SORBS1	chr10:95384285-95397219|chr10:95410777-95414493	sorbin and SH3 domain containing 1 [Source:HGNC Symbol;Acc:HGNC:14565]
circRNA14913	0	0	0	0	0	26.6697	0	46.6274	79.4422	42.0693	102.985	27.843	-3.48671	down	0.068337	0.751658	no	chr19	3656405	3662001	-	3	circRNA	ENST00000335312	PIP5K1C	chr19:3653589-3656404|chr19:3662001-3664821	phosphatidylinositol-4-phosphate 5-kinase type 1 gamma [Source:HGNC Symbol;Acc:HGNC:8996]
circRNA3273	13.8891	12.9249	64.6514	0	0	0	0	0	0	0	0	0	inf	up	0.068368	0.751658	no	chr1	224952670	224968874	+	6	circRNA	ENST00000430092	DNAH14	chr1:224929835-224952669|chr1:224968874-224974090	dynein axonemal heavy chain 14 [Source:HGNC Symbol;Acc:HGNC:2945]
circRNA1369	13.8891	12.9249	0	13.959	15.7026	0	30.9686	108.797	66.2018	52.5867	171.641	27.843	-3.01977	down	0.068399	0.751658	no	chr18	50918110	50932360	+	7	circRNA	ENST00000321341	ME2	chr18:50917508-50918109|chr18:50932360-50939569	malic enzyme 2 [Source:HGNC Symbol;Acc:HGNC:6984]
circRNA20526	0	0	0	0	0	0	0	31.085	52.9614	42.0693	0	13.9215	-inf	down	0.068428	0.751658	no	chr14	33215182	33367268	+	2	circRNA	ENST00000551634	NPAS3	chr14:32935003-33215181|chr14:33367268-33560120	neuronal PAS domain protein 3 [Source:HGNC Symbol;Acc:HGNC:19311]
circRNA7489	0	64.6245	25.8605	13.959	0	13.3348	0	0	0	0	17.1641	0	2.77861	up	0.068481	0.751658	no	chr1	212863725	212889257	+	7	circRNA	ENST00000366971	FLVCR1	chr1:212859190-212863724|chr1:212889257-212894985	feline leukemia virus subgroup C cellular receptor 1 [Source:HGNC Symbol;Acc:HGNC:24682]
circRNA17741	0	0	0	0	0	0	30.9686	46.6274	13.2404	31.552	17.1641	0	-inf	down	0.068508	0.751658	no	chr5	108768093	108798389	+	2	circRNA	ENST00000281092	FER	chr5:108748000-108768092|chr5:108798389-108832769	FER tyrosine kinase [Source:HGNC Symbol;Acc:HGNC:3655]
circRNA2089	13.8891	0	0	0	0	13.3348	46.453	62.1699	13.2404	42.0693	17.1641	97.4504	-3.35498	down	0.068615	0.752275	no	chr5	87331348	87338091	+	4	circRNA	ENST00000274376	RASA1	chr5:87268990-87331347|chr5:87338091-87341289	RAS p21 protein activator 1 [Source:HGNC Symbol;Acc:HGNC:9871]
circRNA3102	41.6672	0	0	0	15.7026	13.3348	61.9373	155.425	52.9614	31.552	34.3283	125.293	-2.70644	down	0.068681	0.752441	no	chr1	77801331	77815231	+	5	circRNA	ENST00000370791	MIGA1	chr1:77783351-77801330|chr1:77815231-77843306	mitoguardin 1 [Source:HGNC Symbol;Acc:HGNC:24741]
circRNA20297	0	0	0	0	0	0	0	15.5425	13.2404	52.5867	51.4924	13.9215	-inf	down	0.069061	0.755474	no	chr16	88737728	88738440	-	3	circRNA	ENST00000301015	PIEZO1	chr16:88737646-88737727|chr16:88738440-88738567	piezo type mechanosensitive ion channel component 1 [Source:HGNC Symbol;Acc:HGNC:28993]
circRNA14238	0	0	0	0	0	40.0045	0	31.085	26.4807	52.5867	171.641	69.6074	-3.13489	down	0.069105	0.755474	no	chrX	80288906	80310233	-	4	circRNA	ENST00000614414	CHMP1B2P	chrX:80234590-80288905|chrX:80310233-80335215	charged multivesicular body protein 1B2, pseudogene [Source:HGNC Symbol;Acc:HGNC:49380]
circRNA2553	41.6672	12.9249	0	0	47.1079	0	61.9373	139.882	39.7211	42.0693	188.805	69.6074	-2.41403	down	0.069151	0.755474	no	chr3	170145423	170178938	-	5	circRNA	ENST00000495893	PHC3	chr3:170136665-170145422|chr3:170178938-170181701	polyhomeotic homolog 3 [Source:HGNC Symbol;Acc:HGNC:15682]
ciRNA379	0	0	0	0	0	0	0	46.6274	52.9614	31.552	17.1641	0	-inf	down	0.069162	0.755474	no	chr15	63060940	63061711	+	1	ciRNA	ENST00000403994	TPM1	chr15:63060939-63061712	tropomyosin 1 [Source:HGNC Symbol;Acc:HGNC:12010]
circRNA2271	27.7781	0	12.9303	41.8771	0	0	0	0	0	0	0	0	inf	up	0.069414	0.757667	no	chr4	73078642	73092300	-	3	circRNA	ENST00000358602	ANKRD17	chr4:73077533-73078641|chr4:73092300-73094078	ankyrin repeat domain 17 [Source:HGNC Symbol;Acc:HGNC:23575]
circRNA22398	0	0	0	0	0	0	0	62.1699	13.2404	42.0693	0	27.843	-inf	down	0.069528	0.757794	no	chr2	48580587	48591855	+	2	circRNA	ENST00000405008	STON1-GTF2A1L	chr2:48529988-48580586|chr2:48591855-48620850	STON1-GTF2A1L readthrough [Source:HGNC Symbol;Acc:HGNC:30651]
circRNA23291	0	0	0	0	0	0	0	62.1699	13.2404	42.0693	0	27.843	-inf	down	0.069528	0.757794	no	chr9	121974009	121974979	-	2	circRNA	ENST00000321582	TTLL11	chr9:121870748-121974008|chr9:121974979-121989194	tubulin tyrosine ligase like 11 [Source:HGNC Symbol;Acc:HGNC:18113]
circRNA2946	13.8891	0	38.7908	69.7952	47.1079	26.6697	123.875	186.51	52.9614	241.899	274.626	69.6074	-2.27442	down	0.070006	0.762442	no	chr1	10095461	10105744	+	4	circRNA	ENST00000253251	UBE4B	chr1:10072214-10095460|chr1:10105744-10117458	ubiquitination factor E4B [Source:HGNC Symbol;Acc:HGNC:12500]
circRNA5688	0	77.5494	51.7211	13.959	15.7026	13.3348	0	15.5425	0	0	0	55.686	1.27412	up	0.070364	0.765778	no	chr20	51725819	51729978	-	2	circRNA	ENST00000311637	ATP9A	chr20:51713074-51725818|chr20:51729978-51768301	ATPase phospholipid transporting 9A (putative) [Source:HGNC Symbol;Acc:HGNC:13540]
circRNA21920	0	0	0	0	0	0	0	46.6274	39.7211	42.0693	17.1641	0	-inf	down	0.070447	0.765787	no	chr4	147906638	147966839	+	8	circRNA	ENST00000336498	ARHGAP10	chr4:147881932-147906637|chr4:147966839-148023262	Rho GTPase activating protein 10 [Source:HGNC Symbol;Acc:HGNC:26099]
circRNA1956	41.6672	12.9249	51.7211	27.9181	31.4053	26.6697	15.4843	0	0	21.0347	0	69.6074	0.857621	up	0.070552	0.765787	no	chr6	138473306	138496371	-	2	circRNA	ENST00000427025	NHSL1	chr6:138447193-138473305|chr6:138496371-138571709	NHS like 1 [Source:HGNC Symbol;Acc:HGNC:21021]
circRNA13856	0	0	0	0	62.8106	0	108.39	108.797	52.9614	21.0347	34.3283	13.9215	-2.43405	down	0.07056	0.765787	no	chr2	202555252	202556531	+	1	circRNA	ENST00000374580	BMPR2	chr2:202552888-202555251|chr2:202556531-202559695	bone morphogenetic protein receptor type 2 [Source:HGNC Symbol;Acc:HGNC:1078]
circRNA21732	0	0	0	0	0	0	0	46.6274	66.2018	21.0347	17.1641	0	-inf	down	0.07058	0.765787	no	chr5	177537873	177539147	-	2	circRNA	ENST00000514747	FAM193B	chr5:177536745-177537872|chr5:177539147-177554248	family with sequence similarity 193 member B [Source:HGNC Symbol;Acc:HGNC:25524]
circRNA281	13.8891	0	0	0	15.7026	0	15.4843	62.1699	39.7211	52.5867	68.6565	55.686	-3.31404	down	0.070675	0.765787	no	chr12	99772922	99806700	-	5	circRNA	ENST00000547776	ANKS1B	chr12:99655210-99772921|chr12:99806700-99812154	ankyrin repeat and sterile alpha motif domain containing 1B [Source:HGNC Symbol;Acc:HGNC:24600]
circRNA2126	13.8891	0	12.9303	0	0	0	92.9059	108.797	13.2404	31.552	17.1641	41.7645	-3.50947	down	0.070693	0.765787	no	chr5	133959494	133960020	-	1	circRNA	ENST00000231512	C5orf15	chr5:133956990-133959493|chr5:133960020-133968445	chromosome 5 open reading frame 15 [Source:HGNC Symbol;Acc:HGNC:20656]
circRNA7728	0	12.9249	0	0	15.7026	0	0	108.797	39.7211	31.552	85.8206	41.7645	-3.42584	down	0.070727	0.765787	no	chr9	131455076	131459356	+	2	circRNA	ENST00000405995	PRRC2B	chr9:131447804-131455075|chr9:131459356-131464762	proline rich coiled-coil 2B [Source:HGNC Symbol;Acc:HGNC:28121]
circRNA22312	0	0	0	0	0	0	0	77.7124	0	10.5173	34.3283	41.7645	-inf	down	0.071175	0.769868	no	chr2	20326261	20327378	-	2	circRNA	ENST00000432105	PUM2	chr2:20318645-20326260|chr2:20327378-20352165	pumilio RNA binding family member 2 [Source:HGNC Symbol;Acc:HGNC:14958]
circRNA3308	27.7781	12.9249	0	13.959	0	0	15.4843	93.2549	52.9614	126.208	34.3283	83.5289	-2.89204	down	0.071208	0.769868	no	chr1	246591512	246591941	+	1	circRNA	ENST00000483271	CNST	chr1:246566663-246591511|chr1:246591941-246621428	consortin, connexin sorting protein [Source:HGNC Symbol;Acc:HGNC:26486]
circRNA21482	0	0	0	0	0	0	0	77.7124	52.9614	10.5173	0	13.9215	-inf	down	0.071556	0.772804	no	chr6	110315342	110322872	-	2	circRNA	ENST00000338882	METTL24	chr6:110299150-110315341|chr6:110322872-110357954	methyltransferase like 24 [Source:HGNC Symbol;Acc:HGNC:21566]
circRNA19198	0	0	0	0	0	0	0	77.7124	39.7211	10.5173	34.3283	0	-inf	down	0.071584	0.772804	no	chr12	31433155	31447769	-	3	circRNA	ENST00000389082	DENND5B	chr12:31426424-31433154|chr12:31447769-31451939	DENN domain containing 5B [Source:HGNC Symbol;Acc:HGNC:28338]
circRNA22980	0	0	0	0	0	0	0	15.5425	0	21.0347	51.4924	69.6074	-inf	down	0.071771	0.773709	no	chr1	155756958	155758034	-	3	circRNA	ENST00000368331	GON4L	chr1:155754488-155756957|chr1:155758034-155760443	gon-4 like [Source:HGNC Symbol;Acc:HGNC:25973]
circRNA8531	0	0	12.9303	0	15.7026	0	15.4843	77.7124	66.2018	63.104	85.8206	0	-3.4287	down	0.071882	0.773709	no	chr17	21006896	21011309	-	3	circRNA	ENST00000261497	USP22	chr17:21004990-21006895|chr17:21011309-21012829	ubiquitin specific peptidase 22 [Source:HGNC Symbol;Acc:HGNC:12621]
circRNA788	13.8891	64.6245	12.9303	27.9181	0	0	0	0	0	0	0	13.9215	3.09996	up	0.071966	0.773709	no	chr17	64821767	64822393	-	2	circRNA	ENST00000578036	PLEKHM1P1	chr17:64805100-64821766|chr17:64822393-64824624	pleckstrin homology and RUN domain containing M1 pseudogene 1 [Source:HGNC Symbol;Acc:HGNC:35411]
circRNA8471	0	0	25.8605	0	0	0	0	62.1699	92.6825	21.0347	17.1641	69.6074	-3.34436	down	0.072001	0.773709	no	chr10	92081320	92091944	-	2	circRNA	ENST00000412050	CPEB3	chr10:92052439-92081319|chr10:92091944-92111075	cytoplasmic polyadenylation element binding protein 3 [Source:HGNC Symbol;Acc:HGNC:21746]
circRNA19538	0	0	0	0	0	0	0	155.425	26.4807	0	17.1641	0	-inf	down	0.072014	0.773709	no	chr11	70333470	70378195	+	17	circRNA	ENST00000253925	PPFIA1	chr11:70332094-70333469|chr11:70378195-70382087	PTPRF interacting protein alpha 1 [Source:HGNC Symbol;Acc:HGNC:9245]
circRNA1111	41.6672	0	90.5119	0	31.4053	13.3348	30.9686	419.647	198.605	147.243	102.985	55.686	-2.43261	down	0.072026	0.773709	no	chr15	98707562	98708107	+	1	circRNA	ENST00000268035	IGF1R	chr15:98649675-98707561|chr15:98708107-98891324	insulin like growth factor 1 receptor [Source:HGNC Symbol;Acc:HGNC:5465]
circRNA19461	0	0	0	0	0	0	0	31.085	26.4807	31.552	17.1641	27.843	-inf	down	0.07205	0.773709	no	chr11	14818183	14819209	+	2	circRNA	ENST00000282096	PDE3B	chr11:14804050-14818182|chr11:14819209-14830697	phosphodiesterase 3B [Source:HGNC Symbol;Acc:HGNC:8779]
circRNA21917	0	0	0	0	0	0	0	31.085	26.4807	21.0347	85.8206	0	-inf	down	0.072086	0.773709	no	chr4	147875021	147881932	+	3	circRNA	ENST00000336498	ARHGAP10	chr4:147866816-147875020|chr4:147881932-147906637	Rho GTPase activating protein 10 [Source:HGNC Symbol;Acc:HGNC:26099]
circRNA8502	0	0	12.9303	0	47.1079	26.6697	0	0	0	0	0	0	inf	up	0.072233	0.774069	no	chr10	125088191	125111093	-	2	circRNA	ENST00000530884	CTBP2	chr10:125039155-125088190|chr10:125111093-125160826	C-terminal binding protein 2 [Source:HGNC Symbol;Acc:HGNC:2495]
circRNA471	27.7781	90.4743	12.9303	0	15.7026	66.6741	108.39	202.052	132.404	126.208	154.477	125.293	-1.99083	down	0.072342	0.774069	no	chr11	117152441	117163892	+	4	circRNA	ENST00000527958	PAFAH1B2	chr11:117144418-117152440|chr11:117163892-117167420	platelet activating factor acetylhydrolase 1b catalytic subunit 2 [Source:HGNC Symbol;Acc:HGNC:8575]
circRNA17824	0	0	0	0	0	0	15.4843	46.6274	0	52.5867	34.3283	0	-inf	down	0.072361	0.774069	no	chr4	38932235	38935790	+	2	circRNA	ENST00000515037	FAM114A1	chr4:38931612-38932234|chr4:38935790-38940967	family with sequence similarity 114 member A1 [Source:HGNC Symbol;Acc:HGNC:25087]
circRNA13493	0	0	0	0	31.4053	0	30.9686	93.2549	39.7211	31.552	85.8206	0	-3.16312	down	0.072374	0.774069	no	chr6	149512155	149517450	-	2	circRNA	ENST00000253329	PPIL4	chr6:149505704-149512154|chr6:149517450-149521059	peptidylprolyl isomerase like 4 [Source:HGNC Symbol;Acc:HGNC:15702]
circRNA2379	27.7781	25.8498	0	0	0	0	77.4216	93.2549	26.4807	42.0693	68.6565	41.7645	-2.70484	down	0.072381	0.774069	no	chr3	4410865	4420146	-	4	circRNA	ENST00000448413	SUMF1	chr3:4376389-4410864|chr3:4420146-4449265	sulfatase modifying factor 1 [Source:HGNC Symbol;Acc:HGNC:20376]
circRNA7332	0	51.6996	12.9303	27.9181	47.1079	40.0045	108.39	202.052	145.644	126.208	308.954	27.843	-2.35494	down	0.072538	0.775188	no	chr1	77717867	77725762	-	7	circRNA	ENST00000370794	USP33	chr1:77715868-77717866|chr1:77725762-77728294	ubiquitin specific peptidase 33 [Source:HGNC Symbol;Acc:HGNC:20059]
circRNA23547	0	0	0	0	0	0	0	0	39.7211	31.552	68.6565	13.9215	-inf	down	0.072797	0.777394	no	chrX	32484919	32573846	-	8	circRNA	ENST00000619831	DMD	chrX:32472309-32484918|chrX:32573846-32595756	dystrophin [Source:HGNC Symbol;Acc:HGNC:2928]
circRNA7917	0	25.8498	0	27.9181	0	26.6697	0	0	0	0	0	0	inf	up	0.072959	0.777836	no	chr8	106679210	106684359	+	3	circRNA	ENST00000531443	OXR1	chr8:106519139-106679209|chr8:106684359-106692727	oxidation resistance 1 [Source:HGNC Symbol;Acc:HGNC:15822]
circRNA6359	0	25.8498	0	0	0	0	30.9686	46.6274	66.2018	42.0693	85.8206	0	-3.39372	down	0.072973	0.777836	no	chr4	4648977	4649542	+	2	circRNA	ENST00000610009	STX18-AS1	chr4:4544907-4648976|chr4:4649542-4705672	STX18 antisense RNA 1 (head to head) [Source:HGNC Symbol;Acc:HGNC:48877]
circRNA25953	0	0	0	0	0	0	0	0	39.7211	126.208	0	0	-inf	down	0.072996	0.777836	no	chr2	23958301	23977075	+	4	circRNA	ENST00000446425	UBXN2A	chr2:23927615-23958300|chr2:23977075-23982895	UBX domain protein 2A [Source:HGNC Symbol;Acc:HGNC:27265]
circRNA8153	0	0	12.9303	0	31.4053	40.0045	0	0	0	0	0	0	inf	up	0.073069	0.778053	no	chr12	51986818	51991993	+	2	circRNA	ENST00000257963	ACVR1B	chr12:51985348-51986817|chr12:51991993-51993984	activin A receptor type 1B [Source:HGNC Symbol;Acc:HGNC:172]
circRNA8666	0	0	25.8605	13.959	0	40.0045	0	0	0	0	0	0	inf	up	0.073154	0.778399	no	chr16	84415483	84425801	+	5	circRNA	ENST00000262429	ATP2C2	chr16:84410765-84415482|chr16:84425801-84439165	ATPase secretory pathway Ca2+ transporting 2 [Source:HGNC Symbol;Acc:HGNC:29103]
circRNA1851	41.6672	38.7747	12.9303	125.631	62.8106	0	92.9059	217.595	105.923	168.277	240.298	264.508	-1.95086	down	0.073437	0.779636	no	chr6	30650994	30651466	+	2	circRNA	ENST00000293604	C6orf136	chr6:30649959-30650993|chr6:30651466-30652647	chromosome 6 open reading frame 136 [Source:HGNC Symbol;Acc:HGNC:21301]
circRNA19350	0	0	0	0	0	0	0	77.7124	0	31.552	17.1641	27.843	-inf	down	0.073475	0.779636	no	chr12	111552280	111552977	-	2	circRNA	ENST00000389153	ATXN2	chr12:111525316-111552279|chr12:111552977-111554157	ataxin 2 [Source:HGNC Symbol;Acc:HGNC:10555]
circRNA9138	0	0	12.9303	0	0	0	61.9373	93.2549	0	63.104	0	41.7645	-4.33002	down	0.073475	0.779636	no	chr20	34470048	34481206	+	6	circRNA	ENST00000374864	ITCH	chr20:34462221-34470047|chr20:34481206-34489265	itchy E3 ubiquitin protein ligase [Source:HGNC Symbol;Acc:HGNC:13890]
circRNA23281	0	0	0	0	0	0	0	46.6274	0	10.5173	0	111.372	-inf	down	0.073481	0.779636	no	chr9	115076032	115076575	-	2	circRNA	ENST00000535648	TNC	chr9:115073866-115076031|chr9:115076575-115077942	tenascin C [Source:HGNC Symbol;Acc:HGNC:5318]
[truncated: 34,106 more rows]
